# Supplementary material for: Proteomic profiling of the human amniotic stem cell-highly abundant secreted proteins
Source: PeerJ. 2025 Jun 3;13:e19449. doi: 10.7717/peerj.19449 (PMC12143284; doi:10.7717/peerj.19449)
Supplement: Supplemental Information 1 [file peerj-13-19449-s001.xlsx]

## Sheet: Quantified proteins
Supplementary Table 1. Secreted proteins identified and quantified from the global proteome of human amniotic stem
Protein IDs	Majority protein IDs	Peptide counts (all)	Peptide counts (razor+unique)	Peptide counts (unique)	Protein names	Gene names	Fasta headers	Number of proteins	Peptides	Razor + unique peptides	Unique peptides	Peptides E1	Peptides E2	Peptides E3	Peptides M1	Peptides M2	Peptides M3	Razor + unique peptides E1	Razor + unique peptides E2	Razor + unique peptides E3	Razor + unique peptides M1	Razor + unique peptides M2	Razor + unique peptides M3	Unique peptides E1	Unique peptides E2	Unique peptides E3	Unique peptides M1	Unique peptides M2	Unique peptides M3	Sequence coverage [%]	Unique + razor sequence coverage [%]	Unique sequence coverage [%]	Mol. weight [kDa]	Sequence length	Sequence lengths	Fraction average	Fraction 1	Fraction 2	Fraction 3	Fraction 4	Q-value	Score	Identification type E1	Identification type E2	Identification type E3	Identification type M1	Identification type M2	Identification type M3	Sequence coverage E1 [%]
A0MZ66	A0MZ66	3	3	3	Shootin-1	KIAA1598	>A0MZ66 Shootin-1 OS=Homo sapiens OX=9606 GN=SHTN1 PE=1 SV=4	1	3	3	3	2	2	1	3	2	2	2	2	1	3	2	2	2	2	1	3	2	2	5.5	5.5	5.5	71.639	631	631	1.92	5	5		2	0	7.6854	By MS/MS	By MS/MS	By matching	By MS/MS	By MS/MS	By MS/MS	4
A8K2U0	A8K2U0	18	18	18	Alpha-2-macroglobulin-like protein 1	A2ML1	>A8K2U0 Alpha-2-macroglobulin-like protein 1 OS=Homo sapiens OX=9606 GN=A2ML1 PE=1 SV=3	1	18	18	18	9	7	18	0	0	0	9	7	18	0	0	0	9	7	18	0	0	0	14	14	14	161.1	1454	1454	2.92	4	6	18	11	0	41.173	By MS/MS	By MS/MS	By MS/MS	By matching	By matching	By matching	6.5
Q99613;B5ME19	Q99613;B5ME19	6;6	6;6	6;6	Eukaryotic translation initiation factor 3 subunit C;Eukaryotic translation initiation factor 3 subunit C-like protein	EIF3C;EIF3CL	>Q99613 Eukaryotic translation initiation factor 3 subunit C OS=Homo sapiens OX=9606 GN=EIF3C PE=1 SV=1;>B5ME19 Eukaryotic translation initiation factor 3 subunit C-like protein OS=Homo sapiens OX=9606 GN=EIF3CL PE=3 SV=1	2	6	6	6	5	6	3	3	5	4	5	6	3	3	5	4	5	6	3	3	5	4	8.3	8.3	8.3	105.34	913	913;914	3.54			12	14	0	43.613	By MS/MS	By MS/MS	By MS/MS	By MS/MS	By MS/MS	By MS/MS	5.9
Q13765;E9PAV3;Q9BZK3	Q13765;E9PAV3	3;3;1	3;3;1	3;3;1	Nascent polypeptide-associated complex subunit alpha;Nascent polypeptide-associated complex subunit alpha, muscle-specific form	NACA	>Q13765 Nascent polypeptide-associated complex subunit alpha OS=Homo sapiens OX=9606 GN=NACA PE=1 SV=1;>E9PAV3 Nascent polypeptide-associated complex subunit alpha, muscle-specific form OS=Homo sapiens OX=9606 GN=NACA PE=1 SV=1	3	3	3	3	3	3	3	3	3	3	3	3	3	3	3	3	3	3	3	3	3	3	19.5	19.5	19.5	23.384	215	215;2078;213	1.77	12	8	6		0	62.673	By MS/MS	By MS/MS	By MS/MS	By MS/MS	By MS/MS	By MS/MS	19.5
O00151	O00151	9	9	9	PDZ and LIM domain protein 1	PDLIM1	>O00151 PDZ and LIM domain protein 1 OS=Homo sapiens OX=9606 GN=PDLIM1 PE=1 SV=4	1	9	9	9	8	6	5	4	3	1	8	6	5	4	3	1	8	6	5	4	3	1	34.7	34.7	34.7	36.071	329	329	2.78		10	13	4	0	31.323	By MS/MS	By MS/MS	By MS/MS	By MS/MS	By MS/MS	By matching	30.1
O00154	O00154	3	3	3	Cytosolic acyl coenzyme A thioester hydrolase	ACOT7	>O00154 Cytosolic acyl coenzyme A thioester hydrolase OS=Homo sapiens OX=9606 GN=ACOT7 PE=1 SV=3	1	3	3	3	1	2	0	2	3	2	1	2	0	2	3	2	1	2	0	2	3	2	10.5	10.5	10.5	41.796	380	380	3.5			5	5	0	6.2579	By matching	By MS/MS	By matching	By MS/MS	By MS/MS	By MS/MS	3.2
O00231	O00231	8	8	8	26S proteasome non-ATPase regulatory subunit 11	PSMD11	>O00231 26S proteasome non-ATPase regulatory subunit 11 OS=Homo sapiens OX=9606 GN=PSMD11 PE=1 SV=3	1	8	8	8	6	8	3	4	6	4	6	8	3	4	6	4	6	8	3	4	6	4	23.7	23.7	23.7	47.463	422	422	3.67	1	2	6	30	0	28.332	By MS/MS	By MS/MS	By MS/MS	By MS/MS	By MS/MS	By MS/MS	17.8
O00232	O00232	8	8	8	26S proteasome non-ATPase regulatory subunit 12	PSMD12	>O00232 26S proteasome non-ATPase regulatory subunit 12 OS=Homo sapiens OX=9606 GN=PSMD12 PE=1 SV=3	1	8	8	8	6	7	3	5	6	5	6	7	3	5	6	5	6	7	3	5	6	5	21.1	21.1	21.1	52.904	456	456	2.15	18		9	7	0	16.889	By MS/MS	By MS/MS	By MS/MS	By MS/MS	By MS/MS	By MS/MS	15.4
O00233	O00233	2	2	2	26S proteasome non-ATPase regulatory subunit 9	PSMD9	>O00233 26S proteasome non-ATPase regulatory subunit 9 OS=Homo sapiens OX=9606 GN=PSMD9 PE=1 SV=3	1	2	2	2	2	1	1	1	1	1	2	1	1	1	1	1	2	1	1	1	1	1	10.8	10.8	10.8	24.682	223	223	2.57		5		2	0	4.2205	By MS/MS	By MS/MS	By matching	By matching	By matching	By matching	10.8
O00299	O00299	10	10	10	Chloride intracellular channel protein 1	CLIC1	>O00299 Chloride intracellular channel protein 1 OS=Homo sapiens OX=9606 GN=CLIC1 PE=1 SV=4	1	10	10	10	6	6	6	8	9	7	6	6	6	8	9	7	6	6	6	8	9	7	55.2	55.2	55.2	26.922	241	241	3.29	2	8	13	26	0	47.982	By MS/MS	By MS/MS	By MS/MS	By MS/MS	By MS/MS	By MS/MS	30.3
O00303	O00303	3	3	3	Eukaryotic translation initiation factor 3 subunit F	EIF3F	>O00303 Eukaryotic translation initiation factor 3 subunit F OS=Homo sapiens OX=9606 GN=EIF3F PE=1 SV=1	1	3	3	3	3	3	2	3	3	2	3	3	2	3	3	2	3	3	2	3	3	2	10.6	10.6	10.6	37.563	357	357	2.12	8	4		5	0	5.136	By MS/MS	By MS/MS	By matching	By matching	By MS/MS	By matching	10.6
O00339	O00339	16	16	16	Matrilin-2	MATN2	>O00339 Matrilin-2 OS=Homo sapiens OX=9606 GN=MATN2 PE=1 SV=4	1	16	16	16	5	1	3	14	15	10	5	1	3	14	15	10	5	1	3	14	15	10	19	19	19	106.84	956	956	2.07	26	8	14	8	0	96.642	By MS/MS	By matching	By MS/MS	By MS/MS	By MS/MS	By MS/MS	6.3
O00391	O00391	26	26	26	Sulfhydryl oxidase 1	QSOX1	>O00391 Sulfhydryl oxidase 1 OS=Homo sapiens OX=9606 GN=QSOX1 PE=1 SV=3	1	26	26	26	16	13	19	22	26	21	16	13	19	22	26	21	16	13	19	22	26	21	40.7	40.7	40.7	82.577	747	747	2.75	12	59	95	33	0	323.31	By MS/MS	By MS/MS	By MS/MS	By MS/MS	By MS/MS	By MS/MS	27.2
O00410;O60518	O00410	7;1	7;1	7;1	Importin-5	IPO5	>O00410 Importin-5 OS=Homo sapiens OX=9606 GN=IPO5 PE=1 SV=4	2	7	7	7	4	5	3	4	7	3	4	5	3	4	7	3	4	5	3	4	7	3	9.8	9.8	9.8	123.63	1097	1097;1105	2.63	7	5	10	8	0	61.432	By MS/MS	By MS/MS	By MS/MS	By MS/MS	By MS/MS	By MS/MS	5.3
O00429	O00429	7	7	7	Dynamin-1-like protein	DNM1L	>O00429 Dynamin-1-like protein OS=Homo sapiens OX=9606 GN=DNM1L PE=1 SV=2	1	7	7	7	3	5	4	2	6	2	3	5	4	2	6	2	3	5	4	2	6	2	10.9	10.9	10.9	81.876	736	736	2.65	6	6	1	10	0	10.37	By matching	By MS/MS	By MS/MS	By MS/MS	By MS/MS	By matching	3.9
O00462	O00462	9	9	9	Beta-mannosidase	MANBA	>O00462 Beta-mannosidase OS=Homo sapiens OX=9606 GN=MANBA PE=2 SV=3	1	9	9	9	7	8	7	8	7	4	7	8	7	8	7	4	7	8	7	8	7	4	12.2	12.2	12.2	100.89	879	879	2.33	16	8	13	9	0	17.719	By MS/MS	By MS/MS	By MS/MS	By MS/MS	By MS/MS	By MS/MS	8.8
O00468	O00468	23	23	23	Agrin;Agrin N-terminal 110 kDa subunit;Agrin C-terminal 110 kDa subunit;Agrin C-terminal 90 kDa fragment;Agrin C-terminal 22 kDa fragment	AGRN	>O00468 Agrin OS=Homo sapiens OX=9606 GN=AGRN PE=1 SV=5	1	23	23	23	21	11	19	11	13	13	21	11	19	11	13	13	21	11	19	11	13	13	14.5	14.5	14.5	217.23	2067	2067	2.88	18	10	26	35	0	103.92	By MS/MS	By MS/MS	By MS/MS	By MS/MS	By MS/MS	By MS/MS	13.5
O00469	O00469	20	20	20	Procollagen-lysine,2-oxoglutarate 5-dioxygenase 2	PLOD2	>O00469 Procollagen-lysine,2-oxoglutarate 5-dioxygenase 2 OS=Homo sapiens OX=9606 GN=PLOD2 PE=1 SV=2	1	20	20	20	3	5	4	17	20	14	3	5	4	17	20	14	3	5	4	17	20	14	29.4	29.4	29.4	84.685	737	737	2.33	29	21	25	17	0	99.55	By matching	By MS/MS	By matching	By MS/MS	By MS/MS	By MS/MS	4.9
O00499	O00499	2	2	2	Myc box-dependent-interacting protein 1	BIN1	>O00499 Myc box-dependent-interacting protein 1 OS=Homo sapiens OX=9606 GN=BIN1 PE=1 SV=1	1	2	2	2	1	1	1	1	2	0	1	1	1	1	2	0	1	1	1	1	2	0	5.2	5.2	5.2	64.699	593	593	2		6			0	16.189	By matching	By MS/MS	By matching	By matching	By MS/MS	By matching	3
O00629;O00505	O00629;O00505	2;2	2;2	2;2	Importin subunit alpha-3;Importin subunit alpha-4	KPNA4;KPNA3	>O00629 Importin subunit alpha-3 OS=Homo sapiens OX=9606 GN=KPNA4 PE=1 SV=1;>O00505 Importin subunit alpha-4 OS=Homo sapiens OX=9606 GN=KPNA3 PE=1 SV=2	2	2	2	2	1	2	0	1	1	1	1	2	0	1	1	1	1	2	0	1	1	1	4.4	4.4	4.4	57.886	521	521;521	2.33		5		1	0.00062775	2.5932	By MS/MS	By MS/MS	By matching	By matching	By matching	By matching	1.7
O00534	O00534	3	3	3	von Willebrand factor A domain-containing protein 5A	VWA5A	>O00534 von Willebrand factor A domain-containing protein 5A OS=Homo sapiens OX=9606 GN=VWA5A PE=2 SV=2	1	3	3	3	2	2	1	2	2	2	2	2	1	2	2	2	2	2	1	2	2	2	5.2	5.2	5.2	86.488	786	786	3.42			7	5	0	4.4051	By MS/MS	By MS/MS	By matching	By MS/MS	By MS/MS	By matching	3.8
O00560	O00560	2	2	2	Syntenin-1	SDCBP	>O00560 Syntenin-1 OS=Homo sapiens OX=9606 GN=SDCBP PE=1 SV=1	1	2	2	2	0	1	2	1	1	1	0	1	2	1	1	1	0	1	2	1	1	1	10.4	10.4	10.4	32.444	298	298	2.67		4		2	0	25.332	By matching	By MS/MS	By MS/MS	By MS/MS	By MS/MS	By MS/MS	0
O00571;O15523	O00571;O15523	3;2	2;1	2;1	ATP-dependent RNA helicase DDX3X;ATP-dependent RNA helicase DDX3Y	DDX3X;DDX3Y	>O00571 ATP-dependent RNA helicase DDX3X OS=Homo sapiens OX=9606 GN=DDX3X PE=1 SV=3;>O15523 ATP-dependent RNA helicase DDX3Y OS=Homo sapiens OX=9606 GN=DDX3Y PE=1 SV=2	2	3	2	2	3	2	1	1	3	3	2	2	1	1	2	2	2	2	1	1	2	2	5	3.3	3.3	73.243	662	662;660	2.38		8	5		0.0022676	1.9654	By MS/MS	By MS/MS	By matching	By MS/MS	By MS/MS	By matching	5
O00584	O00584	4	4	4	Ribonuclease T2	RNASET2	>O00584 Ribonuclease T2 OS=Homo sapiens OX=9606 GN=RNASET2 PE=1 SV=2	1	4	4	4	4	1	4	2	3	2	4	1	4	2	3	2	4	1	4	2	3	2	20.3	20.3	20.3	29.48	256	256	3.25		4	4	8	0	9.8571	By MS/MS	By MS/MS	By MS/MS	By MS/MS	By MS/MS	By MS/MS	20.3
O00622	O00622	8	8	8	Protein CYR61	CYR61	>O00622 Protein CYR61 OS=Homo sapiens OX=9606 GN=CYR61 PE=1 SV=1	1	8	8	8	5	2	3	7	6	5	5	2	3	7	6	5	5	2	3	7	6	5	27.3	27.3	27.3	42.026	381	381	2.77		13	11	6	0	33.987	By MS/MS	By MS/MS	By MS/MS	By MS/MS	By MS/MS	By MS/MS	19.7
O00764	O00764	4	4	4	Pyridoxal kinase	PDXK	>O00764 Pyridoxal kinase OS=Homo sapiens OX=9606 GN=PDXK PE=1 SV=1	1	4	4	4	4	2	0	1	2	2	4	2	0	1	2	2	4	2	0	1	2	2	19.6	19.6	19.6	35.102	312	312	3.82			2	9	0	9.6695	By MS/MS	By MS/MS	By matching	By matching	By matching	By MS/MS	19.6
O14498	O14498	2	2	2	Immunoglobulin superfamily containing leucine-rich repeat protein	ISLR	>O14498 Immunoglobulin superfamily containing leucine-rich repeat protein OS=Homo sapiens OX=9606 GN=ISLR PE=2 SV=1	1	2	2	2	0	0	0	0	2	2	0	0	0	0	2	2	0	0	0	0	2	2	5.8	5.8	5.8	45.997	428	428	3.6			2	3	0	7.9544	By matching	By matching	By matching	By matching	By matching	By MS/MS	0
O14561	O14561	2	2	2	Acyl carrier protein, mitochondrial	NDUFAB1	>O14561 Acyl carrier protein, mitochondrial OS=Homo sapiens OX=9606 GN=NDUFAB1 PE=1 SV=3	1	2	2	2	1	1	1	1	2	2	1	1	1	1	2	2	1	1	1	1	2	2	14.7	14.7	14.7	17.417	156	156	4				9	0	8.6939	By MS/MS	By MS/MS	By MS/MS	By MS/MS	By MS/MS	By MS/MS	9
O14579	O14579	5	5	5	Coatomer subunit epsilon	COPE	>O14579 Coatomer subunit epsilon OS=Homo sapiens OX=9606 GN=COPE PE=1 SV=3	1	5	5	5	3	3	2	2	5	2	3	3	2	2	5	2	3	3	2	2	5	2	25.6	25.6	25.6	34.482	308	308	2.26	4	7	7	1	0	28.371	By MS/MS	By MS/MS	By MS/MS	By MS/MS	By MS/MS	By MS/MS	14.6
P47813;O14602	P47813;O14602	2;2	2;2	2;2	Eukaryotic translation initiation factor 1A, X-chromosomal;Eukaryotic translation initiation factor 1A, Y-chromosomal	EIF1AX;EIF1AY	>P47813 Eukaryotic translation initiation factor 1A, X-chromosomal OS=Homo sapiens OX=9606 GN=EIF1AX PE=1 SV=2;>O14602 Eukaryotic translation initiation factor 1A, Y-chromosomal OS=Homo sapiens OX=9606 GN=EIF1AY PE=1 SV=4	2	2	2	2	2	1	1	1	1	1	2	1	1	1	1	1	2	1	1	1	1	1	14.6	14.6	14.6	16.46	144	144;144	1	7				0	3.983	By MS/MS	By MS/MS	By matching	By MS/MS	By MS/MS	By MS/MS	14.6
O14618	O14618	2	2	2	Copper chaperone for superoxide dismutase	CCS	>O14618 Copper chaperone for superoxide dismutase OS=Homo sapiens OX=9606 GN=CCS PE=1 SV=1	1	2	2	2	0	1	1	1	2	2	0	1	1	1	2	2	0	1	1	1	2	2	7.7	7.7	7.7	29.04	274	274	3.14	2			5	0.0043267	1.6964	By matching	By MS/MS	By MS/MS	By MS/MS	By matching	By MS/MS	0
O14672	O14672	6	6	6	Disintegrin and metalloproteinase domain-containing protein 10	ADAM10	>O14672 Disintegrin and metalloproteinase domain-containing protein 10 OS=Homo sapiens OX=9606 GN=ADAM10 PE=1 SV=1	1	6	6	6	5	1	5	2	5	2	5	1	5	2	5	2	5	1	5	2	5	2	9.4	9.4	9.4	84.141	748	748	2.68	4	8	1	9	0	9.3439	By MS/MS	By matching	By MS/MS	By MS/MS	By MS/MS	By matching	8.3
O14737	O14737	2	2	2	Programmed cell death protein 5	PDCD5	>O14737 Programmed cell death protein 5 OS=Homo sapiens OX=9606 GN=PDCD5 PE=1 SV=3	1	2	2	2	1	1	0	1	1	1	1	1	0	1	1	1	1	1	0	1	1	1	16	16	16	14.285	125	125	3.4	1			4	0	9.3396	By matching	By MS/MS	By matching	By MS/MS	By MS/MS	By MS/MS	8.8
O14745	O14745	2	2	2	Na(+)/H(+) exchange regulatory cofactor NHE-RF1	SLC9A3R1	>O14745 Na(+)/H(+) exchange regulatory cofactor NHE-RF1 OS=Homo sapiens OX=9606 GN=SLC9A3R1 PE=1 SV=4	1	2	2	2	1	1	1	1	2	0	1	1	1	1	2	0	1	1	1	1	2	0	5.3	5.3	5.3	38.868	358	358	1	6				0.0078906	1.5538	By matching	By matching	By matching	By matching	By MS/MS	By matching	2
O14773	O14773	9	9	9	Tripeptidyl-peptidase 1	TPP1	>O14773 Tripeptidyl-peptidase 1 OS=Homo sapiens OX=9606 GN=TPP1 PE=1 SV=2	1	9	9	9	5	3	6	5	6	5	5	3	6	5	6	5	5	3	6	5	6	5	21	21	21	61.247	563	563	3.61	4	1		31	0	35.935	By MS/MS	By MS/MS	By MS/MS	By MS/MS	By MS/MS	By MS/MS	9.9
O14786	O14786	6	6	6	Neuropilin-1	NRP1	>O14786 Neuropilin-1 OS=Homo sapiens OX=9606 GN=NRP1 PE=1 SV=3	1	6	6	6	1	1	1	3	6	5	1	1	1	3	6	5	1	1	1	3	6	5	9.2	9.2	9.2	103.13	923	923	3.21		7	1	11	0	64.877	By MS/MS	By matching	By MS/MS	By MS/MS	By MS/MS	By MS/MS	1.4
O14818;Q8TAA3	O14818	9;4	9;4	9;4	Proteasome subunit alpha type-7	PSMA7	>O14818 Proteasome subunit alpha type-7 OS=Homo sapiens OX=9606 GN=PSMA7 PE=1 SV=1	2	9	9	9	9	9	8	9	8	9	9	9	8	9	8	9	9	9	8	9	8	9	44	44	44	27.887	248	248;256	2.41	15	10	24	7	0	53.201	By MS/MS	By MS/MS	By MS/MS	By MS/MS	By MS/MS	By MS/MS	44
P19105;O14950	P19105;O14950	9;9	9;9	3;3	Myosin regulatory light chain 12A;Myosin regulatory light chain 12B	MYL12A;MYL12B	>P19105 Myosin regulatory light chain 12A OS=Homo sapiens OX=9606 GN=MYL12A PE=1 SV=2;>O14950 Myosin regulatory light chain 12B OS=Homo sapiens OX=9606 GN=MYL12B PE=1 SV=2	2	9	9	3	8	5	5	6	9	6	8	5	5	6	9	6	2	1	1	1	3	2	62.6	62.6	24	19.794	171	171;172	2.33	19	12	9	14	0	116.09	By MS/MS	By MS/MS	By MS/MS	By MS/MS	By MS/MS	By MS/MS	56.7
O14964	O14964	2	2	2	Hepatocyte growth factor-regulated tyrosine kinase substrate	HGS	>O14964 Hepatocyte growth factor-regulated tyrosine kinase substrate OS=Homo sapiens OX=9606 GN=HGS PE=1 SV=1	1	2	2	2	1	1	2	1	2	1	1	1	2	1	2	1	1	1	2	1	2	1	3.1	3.1	3.1	86.191	777	777	3.25	2			6	0	3.5094	By matching	By MS/MS	By MS/MS	By matching	By MS/MS	By MS/MS	1.5
O14974	O14974	5	5	5	Protein phosphatase 1 regulatory subunit 12A	PPP1R12A	>O14974 Protein phosphatase 1 regulatory subunit 12A OS=Homo sapiens OX=9606 GN=PPP1R12A PE=1 SV=1	1	5	5	5	5	2	1	3	3	0	5	2	1	3	3	0	5	2	1	3	3	0	5.8	5.8	5.8	115.28	1030	1030	2.13		13	2		0	12.932	By MS/MS	By MS/MS	By MS/MS	By MS/MS	By MS/MS	By matching	5.8
O14980	O14980	4	4	4	Exportin-1	XPO1	>O14980 Exportin-1 OS=Homo sapiens OX=9606 GN=XPO1 PE=1 SV=1	1	4	4	4	2	2	1	0	4	1	2	2	1	0	4	1	2	2	1	0	4	1	4.3	4.3	4.3	123.38	1071	1071	1.4	8	1		1	0	5.6578	By MS/MS	By MS/MS	By matching	By matching	By MS/MS	By matching	2.1
O15083	O15083	2	2	2	ERC protein 2	ERC2	>O15083 ERC protein 2 OS=Homo sapiens OX=9606 GN=ERC2 PE=1 SV=3	1	2	2	2	1	1	1	1	2	1	1	1	1	1	2	1	1	1	1	1	2	1	1.9	1.9	1.9	110.56	957	957	2.71	1		6		0.00062735	2.5928	By MS/MS	By MS/MS	By MS/MS	By MS/MS	By MS/MS	By matching	1
O15143	O15143	3	3	3	Actin-related protein 2/3 complex subunit 1B	ARPC1B	>O15143 Actin-related protein 2/3 complex subunit 1B OS=Homo sapiens OX=9606 GN=ARPC1B PE=1 SV=3	1	3	3	3	3	2	2	3	3	3	3	2	2	3	3	3	3	2	2	3	3	3	9.4	9.4	9.4	40.949	372	372	2.21	1	13	5		0	12.359	By MS/MS	By MS/MS	By MS/MS	By MS/MS	By MS/MS	By matching	9.4
O15144	O15144	9	9	9	Actin-related protein 2/3 complex subunit 2	ARPC2	>O15144 Actin-related protein 2/3 complex subunit 2 OS=Homo sapiens OX=9606 GN=ARPC2 PE=1 SV=1	1	9	9	9	9	9	7	9	8	6	9	9	7	9	8	6	9	9	7	9	8	6	30	30	30	34.333	300	300	3.12		12	28	19	0	33.735	By MS/MS	By MS/MS	By MS/MS	By MS/MS	By MS/MS	By MS/MS	30
O15145	O15145	4	4	4	Actin-related protein 2/3 complex subunit 3	ARPC3	>O15145 Actin-related protein 2/3 complex subunit 3 OS=Homo sapiens OX=9606 GN=ARPC3 PE=1 SV=3	1	4	4	4	4	3	3	3	3	3	4	3	3	3	3	3	4	3	3	3	3	3	24.7	24.7	24.7	20.546	178	178	2.52		11	12		0	10.182	By MS/MS	By MS/MS	By MS/MS	By MS/MS	By MS/MS	By MS/MS	24.7
O15212	O15212	3	3	3	Prefoldin subunit 6	PFDN6	>O15212 Prefoldin subunit 6 OS=Homo sapiens OX=9606 GN=PFDN6 PE=1 SV=1	1	3	3	3	0	1	0	3	2	2	0	1	0	3	2	2	0	1	0	3	2	2	25.6	25.6	25.6	14.582	129	129	2.5		4	4		0	24.799	By matching	By MS/MS	By matching	By MS/MS	By MS/MS	By MS/MS	0
O15217	O15217	4	4	4	Glutathione S-transferase A4	GSTA4	>O15217 Glutathione S-transferase A4 OS=Homo sapiens OX=9606 GN=GSTA4 PE=1 SV=1	1	4	4	4	4	4	3	3	3	3	4	4	3	3	3	3	4	4	3	3	3	3	20.3	20.3	20.3	25.704	222	222	3.69			8	18	0	22.606	By MS/MS	By MS/MS	By MS/MS	By MS/MS	By MS/MS	By MS/MS	20.3
O15230	O15230	5	4	4	Laminin subunit alpha-5	LAMA5	>O15230 Laminin subunit alpha-5 OS=Homo sapiens OX=9606 GN=LAMA5 PE=1 SV=8	1	5	4	4	4	0	3	0	0	0	3	0	2	0	0	0	3	0	2	0	0	0	1.9	1.7	1.7	399.73	3695	3695	2.2	1	2	2		0	5.7635	By MS/MS	By matching	By MS/MS	By matching	By matching	By matching	1.4
O15240	O15240	4	4	4	Neurosecretory protein VGF;Neuroendocrine regulatory peptide-1;Neuroendocrine regulatory peptide-2;Antimicrobial peptide VGF[554-577]	VGF	>O15240 Neurosecretory protein VGF OS=Homo sapiens OX=9606 GN=VGF PE=1 SV=2	1	4	4	4	2	0	0	3	2	0	2	0	0	3	2	0	2	0	0	3	2	0	9.1	9.1	9.1	67.257	615	615	2.43	1	2	4		0	8.9163	By MS/MS	By matching	By matching	By MS/MS	By MS/MS	By matching	5
O15347	O15347	2	2	2	High mobility group protein B3	HMGB3	>O15347 High mobility group protein B3 OS=Homo sapiens OX=9606 GN=HMGB3 PE=1 SV=4	1	2	2	2	1	0	1	0	2	1	1	0	1	0	2	1	1	0	1	0	2	1	13	13	13	22.98	200	200	3			5		0.001804	2.296	By matching	By matching	By matching	By matching	By MS/MS	By matching	6.5
O15355	O15355	2	2	2	Protein phosphatase 1G	PPM1G	>O15355 Protein phosphatase 1G OS=Homo sapiens OX=9606 GN=PPM1G PE=1 SV=1	1	2	2	2	0	2	1	2	1	1	0	2	1	2	1	1	0	2	1	2	1	1	6.2	6.2	6.2	59.271	546	546	2.38		5	3		0	10.703	By matching	By MS/MS	By MS/MS	By matching	By MS/MS	By matching	0
O15371	O15371	5	5	5	Eukaryotic translation initiation factor 3 subunit D	EIF3D	>O15371 Eukaryotic translation initiation factor 3 subunit D OS=Homo sapiens OX=9606 GN=EIF3D PE=1 SV=1	1	5	5	5	2	4	0	1	2	2	2	4	0	1	2	2	2	4	0	1	2	2	12	12	12	63.972	548	548	3.18		4	1	6	0	17.661	By MS/MS	By MS/MS	By matching	By MS/MS	By MS/MS	By MS/MS	5.3
O15372	O15372	4	4	4	Eukaryotic translation initiation factor 3 subunit H	EIF3H	>O15372 Eukaryotic translation initiation factor 3 subunit H OS=Homo sapiens OX=9606 GN=EIF3H PE=1 SV=1	1	4	4	4	2	2	0	3	3	1	2	2	0	3	3	1	2	2	0	3	3	1	18.2	18.2	18.2	39.93	352	352	2.92	4		1	7	0	21.395	By MS/MS	By MS/MS	By matching	By MS/MS	By MS/MS	By MS/MS	7.4
O15400	O15400	2	2	2	Syntaxin-7	STX7	>O15400 Syntaxin-7 OS=Homo sapiens OX=9606 GN=STX7 PE=1 SV=4	1	2	2	2	2	2	1	2	2	2	2	2	1	2	2	2	2	2	1	2	2	2	11.1	11.1	11.1	29.815	261	261	2.38		8	5		0	62.505	By MS/MS	By MS/MS	By matching	By MS/MS	By MS/MS	By MS/MS	11.1
O15460	O15460	8	8	8	Prolyl 4-hydroxylase subunit alpha-2	P4HA2	>O15460 Prolyl 4-hydroxylase subunit alpha-2 OS=Homo sapiens OX=9606 GN=P4HA2 PE=1 SV=1	1	8	8	8	2	7	3	6	8	6	2	7	3	6	8	6	2	7	3	6	8	6	17.4	17.4	17.4	60.901	535	535	1.36	23	8	2		0	14.876	By MS/MS	By MS/MS	By MS/MS	By MS/MS	By MS/MS	By MS/MS	3.6
O15511	O15511	2	2	2	Actin-related protein 2/3 complex subunit 5	ARPC5	>O15511 Actin-related protein 2/3 complex subunit 5 OS=Homo sapiens OX=9606 GN=ARPC5 PE=1 SV=3	1	2	2	2	1	1	2	1	1	1	1	1	2	1	1	1	1	1	2	1	1	1	16.6	16.6	16.6	16.32	151	151	3.86			1	6	0	2.7939	By MS/MS	By MS/MS	By MS/MS	By MS/MS	By matching	By MS/MS	8.6
O43175	O43175	3	3	3	D-3-phosphoglycerate dehydrogenase	PHGDH	>O43175 D-3-phosphoglycerate dehydrogenase OS=Homo sapiens OX=9606 GN=PHGDH PE=1 SV=4	1	3	3	3	1	2	0	2	3	1	1	2	0	2	3	1	1	2	0	2	3	1	7.3	7.3	7.3	56.65	533	533	2.22		8		1	0	5.765	By MS/MS	By MS/MS	By matching	By MS/MS	By MS/MS	By matching	2.1
O43242	O43242	8	8	8	26S proteasome non-ATPase regulatory subunit 3	PSMD3	>O43242 26S proteasome non-ATPase regulatory subunit 3 OS=Homo sapiens OX=9606 GN=PSMD3 PE=1 SV=2	1	8	8	8	5	6	2	5	7	5	5	6	2	5	7	5	5	6	2	5	7	5	18.2	18.2	18.2	60.977	534	534	1.62	17	17	3		0	24.042	By MS/MS	By MS/MS	By MS/MS	By MS/MS	By MS/MS	By MS/MS	11.6
O43324	O43324	2	2	2	Eukaryotic translation elongation factor 1 epsilon-1	EEF1E1	>O43324 Eukaryotic translation elongation factor 1 epsilon-1 OS=Homo sapiens OX=9606 GN=EEF1E1 PE=1 SV=1	1	2	2	2	2	1	1	2	2	1	2	1	1	2	2	1	2	1	1	2	2	1	11.5	11.5	11.5	19.81	174	174	1.33	6	3			0.0017783	2.2118	By MS/MS	By matching	By matching	By MS/MS	By MS/MS	By matching	11.5
O43390	O43390	8	5	5	Heterogeneous nuclear ribonucleoprotein R	HNRNPR	>O43390 Heterogeneous nuclear ribonucleoprotein R OS=Homo sapiens OX=9606 GN=HNRNPR PE=1 SV=1	1	8	5	5	6	6	6	7	8	8	3	3	3	4	5	5	3	3	3	4	5	5	14.2	9.8	9.8	70.942	633	633	2.21		19	5		0	13.343	By MS/MS	By MS/MS	By MS/MS	By MS/MS	By MS/MS	By MS/MS	11.2
O43396	O43396	11	11	11	Thioredoxin-like protein 1	TXNL1	>O43396 Thioredoxin-like protein 1 OS=Homo sapiens OX=9606 GN=TXNL1 PE=1 SV=3	1	11	11	11	7	9	7	8	9	9	7	9	7	8	9	9	7	9	7	8	9	9	46.4	46.4	46.4	32.251	289	289	1.75	34	7	8	6	0	124.05	By MS/MS	By MS/MS	By MS/MS	By MS/MS	By MS/MS	By MS/MS	36.7
O43399	O43399	4	4	4	Tumor protein D54	TPD52L2	>O43399 Tumor protein D54 OS=Homo sapiens OX=9606 GN=TPD52L2 PE=1 SV=2	1	4	4	4	3	3	3	3	4	2	3	3	3	3	4	2	3	3	3	3	4	2	20.9	20.9	20.9	22.237	206	206	2.33	11	1		9	0	7.5219	By MS/MS	By MS/MS	By MS/MS	By MS/MS	By MS/MS	By MS/MS	17
O43447	O43447	2	2	2	Peptidyl-prolyl cis-trans isomerase H	PPIH	>O43447 Peptidyl-prolyl cis-trans isomerase H OS=Homo sapiens OX=9606 GN=PPIH PE=1 SV=1	1	2	2	2	2	2	2	2	2	2	2	2	2	2	2	2	2	2	2	2	2	2	13	13	13	19.208	177	177	2.08	6		7		0	3.7052	By MS/MS	By MS/MS	By MS/MS	By MS/MS	By MS/MS	By MS/MS	13
O43504	O43504	2	2	2	Ragulator complex protein LAMTOR5	LAMTOR5	>O43504 Ragulator complex protein LAMTOR5 OS=Homo sapiens OX=9606 GN=LAMTOR5 PE=1 SV=1	1	2	2	2	2	2	2	2	2	2	2	2	2	2	2	2	2	2	2	2	2	2	37.4	37.4	37.4	9.6138	91	91	2.88		9	1	7	0	93.94	By MS/MS	By MS/MS	By MS/MS	By MS/MS	By MS/MS	By MS/MS	37.4
O43505	O43505	3	3	3	N-acetyllactosaminide beta-1,3-N-acetylglucosaminyltransferase	B3GNT1	>O43505 Beta-1,4-glucuronyltransferase 1 OS=Homo sapiens OX=9606 GN=B4GAT1 PE=1 SV=1	1	3	3	3	1	1	1	2	3	2	1	1	1	2	3	2	1	1	1	2	3	2	8.4	8.4	8.4	47.119	415	415	1.8	4	5		1	0	4.6568	By matching	By matching	By matching	By matching	By MS/MS	By MS/MS	3.9
O43570	O43570	2	2	2	Carbonic anhydrase 12	CA12	>O43570 Carbonic anhydrase 12 OS=Homo sapiens OX=9606 GN=CA12 PE=1 SV=1	1	2	2	2	0	0	0	0	0	2	0	0	0	0	0	2	0	0	0	0	0	2	7.6	7.6	7.6	39.45	354	354	4				2	0	5.1333	By matching	By matching	By matching	By matching	By matching	By MS/MS	0
O43583	O43583	3	3	3	Density-regulated protein	DENR	>O43583 Density-regulated protein OS=Homo sapiens OX=9606 GN=DENR PE=1 SV=2	1	3	3	3	2	1	0	3	1	1	2	1	0	3	1	1	2	1	0	3	1	1	16.2	16.2	16.2	22.092	198	198	1.25	6	2			0.0012392	2.4886	By MS/MS	By matching	By matching	By MS/MS	By matching	By matching	12.1
O43617	O43617	2	2	2	Trafficking protein particle complex subunit 3	TRAPPC3	>O43617 Trafficking protein particle complex subunit 3 OS=Homo sapiens OX=9606 GN=TRAPPC3 PE=1 SV=1	1	2	2	2	1	2	0	0	1	0	1	2	0	0	1	0	1	2	0	0	1	0	11.7	11.7	11.7	20.274	180	180	3.6			2	3	0	3.2269	By MS/MS	By MS/MS	By matching	By matching	By MS/MS	By matching	7.2
O43670	O43670	4	4	4	BUB3-interacting and GLEBS motif-containing protein ZNF207	ZNF207	>O43670 BUB3-interacting and GLEBS motif-containing protein ZNF207 OS=Homo sapiens OX=9606 GN=ZNF207 PE=1 SV=1	1	4	4	4	4	2	1	2	3	2	4	2	1	2	3	2	4	2	1	2	3	2	9.4	9.4	9.4	50.75	478	478	2.35	3	5	9		0	4.9723	By MS/MS	By MS/MS	By matching	By matching	By MS/MS	By matching	9.4
O43681	O43681	2	2	2	ATPase ASNA1	ASNA1	>O43681 ATPase ASNA1 OS=Homo sapiens OX=9606 GN=ASNA1 PE=1 SV=2	1	2	2	2	1	1	1	2	1	0	1	1	1	2	1	0	1	1	1	2	1	0	7.5	7.5	7.5	38.792	348	348	1.33	5		1		0	2.8225	By MS/MS	By MS/MS	By matching	By MS/MS	By matching	By matching	2.9
O43684	O43684	4	4	4	Mitotic checkpoint protein BUB3	BUB3	>O43684 Mitotic checkpoint protein BUB3 OS=Homo sapiens OX=9606 GN=BUB3 PE=1 SV=1	1	4	4	4	4	4	0	2	4	2	4	4	0	2	4	2	4	4	0	2	4	2	10.7	10.7	10.7	37.154	328	328	3.29			12	5	0	4.1489	By MS/MS	By MS/MS	By matching	By MS/MS	By MS/MS	By MS/MS	10.7
O43707;Q9H254	O43707	47;1	47;1	32;1	Alpha-actinin-4	ACTN4	>O43707 Alpha-actinin-4 OS=Homo sapiens OX=9606 GN=ACTN4 PE=1 SV=2	2	47	47	32	45	45	41	44	41	41	45	45	41	44	41	41	30	30	26	29	26	27	57.6	57.6	40.2	104.85	911	911;2564	2.33	97	158	121	61	0	323.31	By MS/MS	By MS/MS	By MS/MS	By MS/MS	By MS/MS	By MS/MS	56.8
O43719	O43719	2	2	2	HIV Tat-specific factor 1	HTATSF1	>O43719 HIV Tat-specific factor 1 OS=Homo sapiens OX=9606 GN=HTATSF1 PE=1 SV=1	1	2	2	2	1	2	1	1	1	0	1	2	1	1	1	0	1	2	1	1	1	0	3.6	3.6	3.6	85.852	755	755	1.33	5		1		0	5.3496	By MS/MS	By MS/MS	By matching	By MS/MS	By MS/MS	By matching	1.1
O43747	O43747	2	2	2	AP-1 complex subunit gamma-1	AP1G1	>O43747 AP-1 complex subunit gamma-1 OS=Homo sapiens OX=9606 GN=AP1G1 PE=1 SV=5	1	2	2	2	2	2	2	2	1	2	2	2	2	2	1	2	2	2	2	2	1	2	2.9	2.9	2.9	91.35	822	822	3			11		0	4.0716	By MS/MS	By MS/MS	By MS/MS	By MS/MS	By MS/MS	By MS/MS	2.9
O43765	O43765	3	3	3	Small glutamine-rich tetratricopeptide repeat-containing protein alpha	SGTA	>O43765 Small glutamine-rich tetratricopeptide repeat-containing protein alpha OS=Homo sapiens OX=9606 GN=SGTA PE=1 SV=1	1	3	3	3	2	3	2	2	1	2	2	3	2	2	1	2	2	3	2	2	1	2	11.2	11.2	11.2	34.063	313	313	2.79	5	1		8	0	5.4346	By MS/MS	By MS/MS	By MS/MS	By MS/MS	By MS/MS	By MS/MS	7
O43776	O43776	3	3	3	Asparagine--tRNA ligase, cytoplasmic	NARS	>O43776 Asparagine--tRNA ligase, cytoplasmic OS=Homo sapiens OX=9606 GN=NARS PE=1 SV=1	1	3	3	3	2	2	1	2	3	3	2	2	1	2	3	3	2	2	1	2	3	3	7.5	7.5	7.5	62.942	548	548	2.36	1	10		3	0	12.451	By MS/MS	By MS/MS	By matching	By MS/MS	By MS/MS	By MS/MS	4
O43809	O43809	4	4	4	Cleavage and polyadenylation specificity factor subunit 5	NUDT21	>O43809 Cleavage and polyadenylation specificity factor subunit 5 OS=Homo sapiens OX=9606 GN=NUDT21 PE=1 SV=1	1	4	4	4	4	3	3	3	3	3	4	3	3	3	3	3	4	3	3	3	3	3	20.3	20.3	20.3	26.227	227	227	2.05	12		1	6	0	12.194	By MS/MS	By MS/MS	By matching	By MS/MS	By MS/MS	By MS/MS	20.3
O43813	O43813	3	3	3	LanC-like protein 1	LANCL1	>O43813 LanC-like protein 1 OS=Homo sapiens OX=9606 GN=LANCL1 PE=1 SV=1	1	3	3	3	3	3	2	3	3	2	3	3	2	3	3	2	3	3	2	3	3	2	6.8	6.8	6.8	45.283	399	399	2.39	1	12	10		0	4.1248	By MS/MS	By MS/MS	By MS/MS	By MS/MS	By MS/MS	By MS/MS	6.8
O43852	O43852	16	16	16	Calumenin	CALU	>O43852 Calumenin OS=Homo sapiens OX=9606 GN=CALU PE=1 SV=2	1	16	16	16	12	5	13	14	15	13	12	5	13	14	15	13	12	5	13	14	15	13	57.1	57.1	57.1	37.106	315	315	1.83	38	44	13	4	0	323.31	By MS/MS	By MS/MS	By MS/MS	By MS/MS	By MS/MS	By MS/MS	47
O43854	O43854	7	7	7	EGF-like repeat and discoidin I-like domain-containing protein 3	EDIL3	>O43854 EGF-like repeat and discoidin I-like domain-containing protein 3 OS=Homo sapiens OX=9606 GN=EDIL3 PE=1 SV=1	1	7	7	7	0	1	0	7	6	2	0	1	0	7	6	2	0	1	0	7	6	2	22.1	22.1	22.1	53.764	480	480	2.62	2	5	6	3	0	31.435	By matching	By matching	By matching	By MS/MS	By MS/MS	By matching	0
O43865;Q96HN2	O43865;Q96HN2	6;5	6;5	6;5	Putative adenosylhomocysteinase 2;Putative adenosylhomocysteinase 3	AHCYL1;AHCYL2	>O43865 S-adenosylhomocysteine hydrolase-like protein 1 OS=Homo sapiens OX=9606 GN=AHCYL1 PE=1 SV=2;>Q96HN2 Adenosylhomocysteinase 3 OS=Homo sapiens OX=9606 GN=AHCYL2 PE=1 SV=1	2	6	6	6	3	6	2	3	2	3	3	6	2	3	2	3	3	6	2	3	2	3	12.5	12.5	12.5	58.951	530	530;611	2.35		13	7		0	9.0746	By MS/MS	By MS/MS	By MS/MS	By MS/MS	By MS/MS	By matching	5.3
O60220	O60220	2	2	2	Mitochondrial import inner membrane translocase subunit Tim8 A	TIMM8A	>O60220 Mitochondrial import inner membrane translocase subunit Tim8 A OS=Homo sapiens OX=9606 GN=TIMM8A PE=1 SV=1	1	2	2	2	2	2	2	2	2	2	2	2	2	2	2	2	2	2	2	2	2	2	22.7	22.7	22.7	10.998	97	97	1	12				0.0012438	2.5241	By MS/MS	By MS/MS	By MS/MS	By MS/MS	By MS/MS	By MS/MS	22.7
O60271	O60271	2	2	2	C-Jun-amino-terminal kinase-interacting protein 4	SPAG9	>O60271 C-Jun-amino-terminal kinase-interacting protein 4 OS=Homo sapiens OX=9606 GN=SPAG9 PE=1 SV=4	1	2	2	2	2	1	1	2	2	0	2	1	1	2	2	0	2	1	1	2	2	0	1.7	1.7	1.7	146.2	1321	1321	1.12	7	1			0	3.7806	By MS/MS	By MS/MS	By matching	By MS/MS	By MS/MS	By matching	1.7
O60493	O60493	4	4	3	Sorting nexin-3	SNX3	>O60493 Sorting nexin-3 OS=Homo sapiens OX=9606 GN=SNX3 PE=1 SV=3	1	4	4	3	4	2	3	3	3	1	4	2	3	3	3	1	3	2	3	2	2	1	25.9	25.9	20.4	18.762	162	162	2.12	6	2	8		0	7.224	By MS/MS	By matching	By MS/MS	By MS/MS	By MS/MS	By matching	25.9
O60502	O60502	2	2	2	Bifunctional protein NCOAT;Protein O-GlcNAcase;Histone acetyltransferase	MGEA5	>O60502 Protein O-GlcNAcase OS=Homo sapiens OX=9606 GN=MGEA5 PE=1 SV=2	1	2	2	2	1	1	1	1	1	1	1	1	1	1	1	1	1	1	1	1	1	1	2.7	2.7	2.7	102.91	916	916	1.17	5	1			0.0022497	1.9194	By matching	By MS/MS	By matching	By MS/MS	By MS/MS	By matching	1.3
O60506	O60506	13	13	10	Heterogeneous nuclear ribonucleoprotein Q	SYNCRIP	>O60506 Heterogeneous nuclear ribonucleoprotein Q OS=Homo sapiens OX=9606 GN=SYNCRIP PE=1 SV=2	1	13	13	10	12	10	9	9	12	9	12	10	9	9	12	9	9	7	6	6	9	6	25.7	25.7	21.2	69.602	623	623	2.77	9	15	24	18	0	33.497	By MS/MS	By MS/MS	By MS/MS	By MS/MS	By MS/MS	By MS/MS	22.8
O60513	O60513	4	4	4	Beta-1,4-galactosyltransferase 4;N-acetyllactosamine synthase;Lactotriaosylceramide beta-1,4-galactosyltransferase	B4GALT4	>O60513 Beta-1,4-galactosyltransferase 4 OS=Homo sapiens OX=9606 GN=B4GALT4 PE=1 SV=1	1	4	4	4	4	3	4	1	4	2	4	3	4	1	4	2	4	3	4	1	4	2	12.8	12.8	12.8	40.041	344	344	2.78	6		4	8	0	14.009	By MS/MS	By MS/MS	By MS/MS	By matching	By MS/MS	By matching	12.8
O60568	O60568	8	8	8	Procollagen-lysine,2-oxoglutarate 5-dioxygenase 3	PLOD3	>O60568 Procollagen-lysine,2-oxoglutarate 5-dioxygenase 3 OS=Homo sapiens OX=9606 GN=PLOD3 PE=1 SV=1	1	8	8	8	0	0	0	6	8	6	0	0	0	6	8	6	0	0	0	6	8	6	13.7	13.7	13.7	84.784	738	738	2.48	4	9	2	6	0	18.752	By matching	By matching	By matching	By MS/MS	By MS/MS	By MS/MS	0
O60610	O60610	2	2	2	Protein diaphanous homolog 1	DIAPH1	>O60610 Protein diaphanous homolog 1 OS=Homo sapiens OX=9606 GN=DIAPH1 PE=1 SV=2	1	2	2	2	2	2	0	2	1	0	2	2	0	2	1	0	2	2	0	2	1	0	1.8	1.8	1.8	141.35	1272	1272	2.57		3	4		0	3.5262	By MS/MS	By matching	By matching	By MS/MS	By matching	By matching	1.8
O60664	O60664	6	6	6	Perilipin-3	PLIN3	>O60664 Perilipin-3 OS=Homo sapiens OX=9606 GN=PLIN3 PE=1 SV=3	1	6	6	6	4	4	2	5	5	4	4	4	2	5	5	4	4	4	2	5	5	4	20.7	20.7	20.7	47.074	434	434	2.38	5	12		7	0	54.488	By MS/MS	By MS/MS	By MS/MS	By MS/MS	By MS/MS	By MS/MS	14.7
O60687	O60687	12	12	12	Sushi repeat-containing protein SRPX2	SRPX2	>O60687 Sushi repeat-containing protein SRPX2 OS=Homo sapiens OX=9606 GN=SRPX2 PE=1 SV=1	1	12	12	12	4	2	1	12	12	12	4	2	1	12	12	12	4	2	1	12	12	12	33.8	33.8	33.8	52.971	465	465	2.69	8	21	6	20	0	82.027	By MS/MS	By MS/MS	By matching	By MS/MS	By MS/MS	By MS/MS	8.6
O60701	O60701	4	4	4	UDP-glucose 6-dehydrogenase	UGDH	>O60701 UDP-glucose 6-dehydrogenase OS=Homo sapiens OX=9606 GN=UGDH PE=1 SV=1	1	4	4	4	1	1	0	2	4	1	1	1	0	2	4	1	1	1	0	2	4	1	11.1	11.1	11.1	55.023	494	494	1.44	7	1		1	0	6.2966	By MS/MS	By MS/MS	By matching	By MS/MS	By MS/MS	By matching	2.4
P41567;O60739	P41567;O60739	3;3	3;3	3;3	Eukaryotic translation initiation factor 1;Eukaryotic translation initiation factor 1b	EIF1;EIF1B	>P41567 Eukaryotic translation initiation factor 1 OS=Homo sapiens OX=9606 GN=EIF1 PE=1 SV=1;>O60739 Eukaryotic translation initiation factor 1b OS=Homo sapiens OX=9606 GN=EIF1B PE=1 SV=2	2	3	3	3	2	1	1	2	1	0	2	1	1	2	1	0	2	1	1	2	1	0	47.8	47.8	47.8	12.732	113	113;113	2.29		5	2		0	32.537	By MS/MS	By MS/MS	By MS/MS	By MS/MS	By MS/MS	By matching	26.5
O60749	O60749	3	3	2	Sorting nexin-2	SNX2	>O60749 Sorting nexin-2 OS=Homo sapiens OX=9606 GN=SNX2 PE=1 SV=2	1	3	3	2	3	3	3	3	3	3	3	3	3	3	3	3	2	2	2	2	2	2	6.2	6.2	4	58.47	519	519	1.33	12	6			0	6.1226	By MS/MS	By MS/MS	By MS/MS	By MS/MS	By MS/MS	By MS/MS	6.2
O60763	O60763	7	7	7	General vesicular transport factor p115	USO1	>O60763 General vesicular transport factor p115 OS=Homo sapiens OX=9606 GN=USO1 PE=1 SV=2	1	7	7	7	6	5	5	7	7	5	6	5	5	7	7	5	6	5	5	7	7	5	7.5	7.5	7.5	107.89	962	962	2.38	3	18	18		0	29.809	By MS/MS	By MS/MS	By MS/MS	By MS/MS	By MS/MS	By MS/MS	6.4
O60784	O60784	2	2	2	Target of Myb protein 1	TOM1	>O60784 Target of Myb protein 1 OS=Homo sapiens OX=9606 GN=TOM1 PE=1 SV=2	1	2	2	2	1	0	1	1	1	0	1	0	1	1	1	0	1	0	1	1	1	0	5.7	5.7	5.7	53.818	492	492	2		4			0	9.8459	By MS/MS	By matching	By MS/MS	By MS/MS	By MS/MS	By matching	3.5
Q99880;Q99879;Q99877;Q93079;Q5QNW6;Q16778;P62807;P58876;P57053;P33778;P23527;P06899;O60814;Q8N257;Q96A08	Q99880;Q99879;Q99877;Q93079;Q5QNW6;Q16778;P62807;P58876;P57053;P33778;P23527;P06899;O60814;Q8N257;Q96A08	3;3;3;3;3;3;3;3;3;3;3;3;3;2;2	3;3;3;3;3;3;3;3;3;3;3;3;3;2;2	3;3;3;3;3;3;3;3;3;3;3;3;3;2;2	Histone H2B type 1-L;Histone H2B type 1-M;Histone H2B type 1-N;Histone H2B type 1-H;Histone H2B type 2-F;Histone H2B type 2-E;Histone H2B type 1-C/E/F/G/I;Histone H2B type 1-D;Histone H2B type F-S;Histone H2B type 1-B;Histone H2B type 1-O;Histone H2B type 1-J;Histone H2B type 1-K;Histone H2B type 3-B;Histone H2B type 1-A	HIST1H2BL;HIST1H2BM;HIST1H2BN;HIST1H2BH;HIST2H2BF;HIST2H2BE;HIST1H2BC;HIST1H2BD;H2BFS;HIST1H2BB;HIST1H2BO;HIST1H2BJ;HIST1H2BK;HIST3H2BB;HIST1H2BA	>Q99880 Histone H2B type 1-L OS=Homo sapiens OX=9606 GN=HIST1H2BL PE=1 SV=3;>Q99879 Histone H2B type 1-M OS=Homo sapiens OX=9606 GN=HIST1H2BM PE=1 SV=3;>Q99877 Histone H2B type 1-N OS=Homo sapiens OX=9606 GN=HIST1H2BN PE=1 SV=3;>Q93079 Histone H2B type 1-H	15	3	3	3	2	2	0	2	2	2	2	2	0	2	2	2	2	2	0	2	2	2	24.6	24.6	24.6	13.952	126	126;126;126;126;126;126;126;126;126;126;126;126;126;126;127	2.5	5	1	1	5	0	3.1147	By MS/MS	By MS/MS	By matching	By MS/MS	By MS/MS	By MS/MS	19
O60841	O60841	3	3	3	Eukaryotic translation initiation factor 5B	EIF5B	>O60841 Eukaryotic translation initiation factor 5B OS=Homo sapiens OX=9606 GN=EIF5B PE=1 SV=4	1	3	3	3	1	0	0	2	1	1	1	0	0	2	1	1	1	0	0	2	1	1	3.4	3.4	3.4	138.83	1220	1220	3.33			4	2	0	3.6723	By matching	By matching	By matching	By MS/MS	By MS/MS	By MS/MS	1.6
O60869	O60869	2	2	2	Endothelial differentiation-related factor 1	EDF1	>O60869 Endothelial differentiation-related factor 1 OS=Homo sapiens OX=9606 GN=EDF1 PE=1 SV=1	1	2	2	2	2	1	1	2	2	2	2	1	1	2	2	2	2	1	1	2	2	2	18.2	18.2	18.2	16.368	148	148	1.92	1	12			0	11.025	By MS/MS	By MS/MS	By matching	By MS/MS	By MS/MS	By MS/MS	18.2
O60888	O60888	2	2	2	Protein CutA	CUTA	>O60888 Protein CutA OS=Homo sapiens OX=9606 GN=CUTA PE=1 SV=2	1	2	2	2	2	2	2	2	2	2	2	2	2	2	2	2	2	2	2	2	2	2	14.5	14.5	14.5	19.116	179	179	3.2		6		9	0	9.1462	By MS/MS	By MS/MS	By MS/MS	By MS/MS	By MS/MS	By MS/MS	14.5
O75083	O75083	14	14	14	WD repeat-containing protein 1	WDR1	>O75083 WD repeat-containing protein 1 OS=Homo sapiens OX=9606 GN=WDR1 PE=1 SV=4	1	14	14	14	13	13	11	13	13	9	13	13	11	13	13	9	13	13	11	13	13	9	29.4	29.4	29.4	66.193	606	606	2.79	15	16	38	26	0	95.387	By MS/MS	By MS/MS	By MS/MS	By MS/MS	By MS/MS	By MS/MS	27.6
O75116	O75116	2	2	2	Rho-associated protein kinase 2	ROCK2	>O75116 Rho-associated protein kinase 2 OS=Homo sapiens OX=9606 GN=ROCK2 PE=1 SV=4	1	2	2	2	0	1	0	1	0	0	0	1	0	1	0	0	0	1	0	1	0	0	1.8	1.8	1.8	160.9	1388	1388	1	2				0	3.0452	By matching	By MS/MS	By matching	By MS/MS	By matching	By matching	0
O75326	O75326	11	11	11	Semaphorin-7A	SEMA7A	>O75326 Semaphorin-7A OS=Homo sapiens OX=9606 GN=SEMA7A PE=1 SV=1	1	11	11	11	8	10	5	2	1	6	8	10	5	2	1	6	8	10	5	2	1	6	21.8	21.8	21.8	74.823	666	666	2.59	4	12	12	6	0	31.444	By MS/MS	By MS/MS	By MS/MS	By MS/MS	By MS/MS	By MS/MS	14.3
O75339	O75339	2	2	2	Cartilage intermediate layer protein 1;Cartilage intermediate layer protein 1 C1;Cartilage intermediate layer protein 1 C2	CILP	>O75339 Cartilage intermediate layer protein 1 OS=Homo sapiens OX=9606 GN=CILP PE=1 SV=4	1	2	2	2	0	0	0	0	2	1	0	0	0	0	2	1	0	0	0	0	2	1	1.7	1.7	1.7	132.56	1184	1184	3.4	1			4	0.0038126	1.737	By matching	By matching	By matching	By matching	By MS/MS	By MS/MS	0
O75347	O75347	3	3	3	Tubulin-specific chaperone A	TBCA	>O75347 Tubulin-specific chaperone A OS=Homo sapiens OX=9606 GN=TBCA PE=1 SV=3	1	3	3	3	2	1	3	3	3	1	2	1	3	3	3	1	2	1	3	3	3	1	27.8	27.8	27.8	12.855	108	108	2.08	4	4	5		0	5.2828	By MS/MS	By matching	By MS/MS	By MS/MS	By MS/MS	By matching	21.3
O75368	O75368	4	4	4	SH3 domain-binding glutamic acid-rich-like protein	SH3BGRL	>O75368 SH3 domain-binding glutamic acid-rich-like protein OS=Homo sapiens OX=9606 GN=SH3BGRL PE=1 SV=1	1	4	4	4	4	4	3	4	3	4	4	4	3	4	3	4	4	4	3	4	3	4	46.5	46.5	46.5	12.774	114	114	3.12		6	11	9	0	77.509	By MS/MS	By MS/MS	By MS/MS	By MS/MS	By MS/MS	By MS/MS	46.5
O75369	O75369	95	95	84	Filamin-B	FLNB	>O75369 Filamin-B OS=Homo sapiens OX=9606 GN=FLNB PE=1 SV=2	1	95	95	84	93	67	74	46	66	42	93	67	74	46	66	42	83	58	65	38	57	34	48	48	43.5	278.16	2602	2602	2.59	92	153	140	127	0	323.31	By MS/MS	By MS/MS	By MS/MS	By MS/MS	By MS/MS	By MS/MS	47.2
O75390	O75390	6	6	6	Citrate synthase, mitochondrial	CS	>O75390 Citrate synthase, mitochondrial OS=Homo sapiens OX=9606 GN=CS PE=1 SV=2	1	6	6	6	4	4	4	3	6	4	4	4	4	3	6	4	4	4	4	3	6	4	13.1	13.1	13.1	51.712	466	466	3.48		7	2	22	0	15.878	By MS/MS	By MS/MS	By MS/MS	By MS/MS	By MS/MS	By MS/MS	9.7
O75436	O75436	5	5	5	Vacuolar protein sorting-associated protein 26A	VPS26A	>O75436 Vacuolar protein sorting-associated protein 26A OS=Homo sapiens OX=9606 GN=VPS26A PE=1 SV=2	1	5	5	5	4	3	2	2	4	3	4	3	2	2	4	3	4	3	2	2	4	3	22.3	22.3	22.3	38.169	327	327	3.39		5	1	12	0	17.337	By MS/MS	By MS/MS	By MS/MS	By MS/MS	By MS/MS	By MS/MS	16.2
O75475	O75475	2	2	2	PC4 and SFRS1-interacting protein	PSIP1	>O75475 PC4 and SFRS1-interacting protein OS=Homo sapiens OX=9606 GN=PSIP1 PE=1 SV=1	1	2	2	2	2	1	0	1	0	1	2	1	0	1	0	1	2	1	0	1	0	1	4.7	4.7	4.7	60.103	530	530	1	5				0.0083595	1.5161	By MS/MS	By MS/MS	By matching	By matching	By matching	By matching	4.7
O75503	O75503	3	3	3	Ceroid-lipofuscinosis neuronal protein 5	CLN5	>O75503 Ceroid-lipofuscinosis neuronal protein 5 OS=Homo sapiens OX=9606 GN=CLN5 PE=1 SV=2	1	3	3	3	2	2	3	1	2	1	2	2	3	1	2	1	2	2	3	1	2	1	9.2	9.2	9.2	41.496	358	358	3.82		1		10	0	3.1522	By MS/MS	By MS/MS	By MS/MS	By matching	By matching	By matching	5.6
O75531	O75531	3	3	3	Barrier-to-autointegration factor;Barrier-to-autointegration factor, N-terminally processed	BANF1	>O75531 Barrier-to-autointegration factor OS=Homo sapiens OX=9606 GN=BANF1 PE=1 SV=1	1	3	3	3	3	2	1	2	2	1	3	2	1	2	2	1	3	2	1	2	2	1	34.8	34.8	34.8	10.058	89	89	1.58	7	4		1	0	9.3377	By MS/MS	By MS/MS	By matching	By matching	By matching	By matching	34.8
O75635	O75635	10	10	10	Serpin B7	SERPINB7	>O75635 Serpin B7 OS=Homo sapiens OX=9606 GN=SERPINB7 PE=1 SV=1	1	10	10	10	5	4	10	0	0	2	5	4	10	0	0	2	5	4	10	0	0	2	26.8	26.8	26.8	42.904	380	380	2.35	7	6	10	3	0	41.024	By MS/MS	By MS/MS	By MS/MS	By matching	By matching	By matching	13.2
O75643	O75643	2	2	2	U5 small nuclear ribonucleoprotein 200 kDa helicase	SNRNP200	>O75643 U5 small nuclear ribonucleoprotein 200 kDa helicase OS=Homo sapiens OX=9606 GN=SNRNP200 PE=1 SV=2	1	2	2	2	0	1	0	0	1	0	0	1	0	0	1	0	0	1	0	0	1	0	1.2	1.2	1.2	244.5	2136	2136	3		1		1	0	4.074	By matching	By MS/MS	By matching	By matching	By MS/MS	By matching	0
O75663	O75663	6	6	6	TIP41-like protein	TIPRL	>O75663 TIP41-like protein OS=Homo sapiens OX=9606 GN=TIPRL PE=1 SV=2	1	6	6	6	4	5	1	5	5	1	4	5	1	5	5	1	4	5	1	5	5	1	29	29	29	31.444	272	272	2.73	6	1	8	7	0	11.264	By MS/MS	By MS/MS	By MS/MS	By MS/MS	By MS/MS	By MS/MS	19.9
O75718	O75718	3	3	3	Cartilage-associated protein	CRTAP	>O75718 Cartilage-associated protein OS=Homo sapiens OX=9606 GN=CRTAP PE=1 SV=1	1	3	3	3	0	0	0	1	3	2	0	0	0	1	3	2	0	0	0	1	3	2	8.5	8.5	8.5	46.561	401	401	3.33		1	2	3	0	3.8186	By matching	By matching	By matching	By MS/MS	By MS/MS	By MS/MS	0
O75787	O75787	4	4	4	Renin receptor	ATP6AP2	>O75787 Renin receptor OS=Homo sapiens OX=9606 GN=ATP6AP2 PE=1 SV=2	1	4	4	4	4	3	2	3	3	1	4	3	2	3	3	1	4	3	2	3	3	1	13.7	13.7	13.7	39.008	350	350	3			18		0	14.831	By MS/MS	By matching	By MS/MS	By MS/MS	By MS/MS	By matching	13.7
O75821	O75821	5	5	5	Eukaryotic translation initiation factor 3 subunit G	EIF3G	>O75821 Eukaryotic translation initiation factor 3 subunit G OS=Homo sapiens OX=9606 GN=EIF3G PE=1 SV=2	1	5	5	5	2	3	1	3	5	3	2	3	1	3	5	3	2	3	1	3	5	3	18.8	18.8	18.8	35.611	320	320	1.71	5	12			0	9.7756	By MS/MS	By MS/MS	By matching	By MS/MS	By MS/MS	By MS/MS	6.9
O75822	O75822	5	5	5	Eukaryotic translation initiation factor 3 subunit J	EIF3J	>O75822 Eukaryotic translation initiation factor 3 subunit J OS=Homo sapiens OX=9606 GN=EIF3J PE=1 SV=2	1	5	5	5	5	4	4	5	4	5	5	4	4	5	4	5	5	4	4	5	4	5	19.4	19.4	19.4	29.062	258	258	1.64	22			6	0	14.518	By MS/MS	By MS/MS	By MS/MS	By MS/MS	By MS/MS	By MS/MS	19.4
O75874	O75874	9	9	8	Isocitrate dehydrogenase [NADP] cytoplasmic	IDH1	>O75874 Isocitrate dehydrogenase [NADP] cytoplasmic OS=Homo sapiens OX=9606 GN=IDH1 PE=1 SV=2	1	9	9	8	5	4	4	6	5	6	5	4	4	6	5	6	4	3	3	5	4	5	23.4	23.4	21.3	46.659	414	414	2.39	12	9	7	10	0	73.339	By MS/MS	By MS/MS	By MS/MS	By MS/MS	By MS/MS	By MS/MS	12.1
O75882	O75882	4	4	4	Attractin	ATRN	>O75882 Attractin OS=Homo sapiens OX=9606 GN=ATRN PE=1 SV=2	1	4	4	4	3	1	1	2	3	1	3	1	1	2	3	1	3	1	1	2	3	1	3.6	3.6	3.6	158.54	1429	1429	1.73	5	4	2		0	8.4524	By MS/MS	By matching	By matching	By matching	By MS/MS	By MS/MS	2.4
O75915	O75915	2	2	2	PRA1 family protein 3	ARL6IP5	>O75915 PRA1 family protein 3 OS=Homo sapiens OX=9606 GN=ARL6IP5 PE=1 SV=1	1	2	2	2	1	1	0	0	1	0	1	1	0	0	1	0	1	1	0	0	1	0	16	16	16	21.614	188	188	3			3		0	2.8544	By MS/MS	By MS/MS	By matching	By matching	By MS/MS	By matching	10.1
O76003	O76003	2	2	2	Glutaredoxin-3	GLRX3	>O76003 Glutaredoxin-3 OS=Homo sapiens OX=9606 GN=GLRX3 PE=1 SV=2	1	2	2	2	0	0	0	0	2	0	0	0	0	0	2	0	0	0	0	0	2	0	9.3	9.3	9.3	37.432	335	335	2	1		1		0	3.8051	By matching	By matching	By matching	By matching	By MS/MS	By matching	0
O76038	O76038	3	3	3	Secretagogin	SCGN	>O76038 Secretagogin OS=Homo sapiens OX=9606 GN=SCGN PE=2 SV=2	1	3	3	3	3	3	2	2	2	2	3	3	2	2	2	2	3	3	2	2	2	2	11.6	11.6	11.6	32.039	276	276	2.71		4	10		0	4.408	By MS/MS	By MS/MS	By MS/MS	By MS/MS	By MS/MS	By MS/MS	11.6
O76061	O76061	5	5	5	Stanniocalcin-2	STC2	>O76061 Stanniocalcin-2 OS=Homo sapiens OX=9606 GN=STC2 PE=1 SV=1	1	5	5	5	0	3	0	4	5	4	0	3	0	4	5	4	0	3	0	4	5	4	26.5	26.5	26.5	33.248	302	302	2.71	4	12		12	0	124.53	By matching	By MS/MS	By matching	By MS/MS	By MS/MS	By MS/MS	0
O94760	O94760	8	8	7	N(G),N(G)-dimethylarginine dimethylaminohydrolase 1	DDAH1	>O94760 N(G),N(G)-dimethylarginine dimethylaminohydrolase 1 OS=Homo sapiens OX=9606 GN=DDAH1 PE=1 SV=3	1	8	8	7	6	7	6	4	6	6	6	7	6	4	6	6	5	6	5	3	5	5	32.6	32.6	29.8	31.121	285	285	3.07	5	5	18	18	0	14.857	By MS/MS	By MS/MS	By MS/MS	By MS/MS	By MS/MS	By MS/MS	21.1
O94788;P30837	O94788	11;1	11;1	9;0	Retinal dehydrogenase 2	ALDH1A2	>O94788 Retinal dehydrogenase 2 OS=Homo sapiens OX=9606 GN=ALDH1A2 PE=1 SV=3	2	11	11	9	8	10	7	10	9	10	8	10	7	10	9	10	6	8	5	8	7	9	25.5	25.5	21.8	56.723	518	518;517	2.84	6	10	27	13	0	58.74	By MS/MS	By MS/MS	By MS/MS	By MS/MS	By MS/MS	By MS/MS	18
O94855	O94855	5	5	5	Protein transport protein Sec24D	SEC24D	>O94855 Protein transport protein Sec24D OS=Homo sapiens OX=9606 GN=SEC24D PE=1 SV=2	1	5	5	5	4	4	3	4	4	3	4	4	3	4	4	3	4	4	3	4	4	3	6.1	6.1	6.1	113.01	1032	1032	2.18	13		1	8	0	13.067	By MS/MS	By MS/MS	By matching	By MS/MS	By MS/MS	By matching	5.2
O94856	O94856	3	3	3	Neurofascin	NFASC	>O94856 Neurofascin OS=Homo sapiens OX=9606 GN=NFASC PE=1 SV=4	1	3	3	3	2	2	2	2	3	2	2	2	2	2	3	2	2	2	2	2	3	2	2.3	2.3	2.3	150.02	1347	1347	1.07	13	1			0	3.3747	By MS/MS	By MS/MS	By MS/MS	By MS/MS	By MS/MS	By MS/MS	1.5
O94875	O94875	2	2	2	Sorbin and SH3 domain-containing protein 2	SORBS2	>O94875 Sorbin and SH3 domain-containing protein 2 OS=Homo sapiens OX=9606 GN=SORBS2 PE=1 SV=3	1	2	2	2	2	2	2	2	2	0	2	2	2	2	2	0	2	2	2	2	2	0	1.9	1.9	1.9	124.11	1100	1100	2.75	5			7	0	2.9579	By MS/MS	By MS/MS	By MS/MS	By MS/MS	By MS/MS	By matching	1.9
O94907;Q9UBU2	O94907	6;1	6;1	6;1	Dickkopf-related protein 1	DKK1	>O94907 Dickkopf-related protein 1 OS=Homo sapiens OX=9606 GN=DKK1 PE=1 SV=1	2	6	6	6	0	0	4	5	5	1	0	0	4	5	5	1	0	0	4	5	5	1	29.3	29.3	29.3	28.671	266	266;259	2.15	5	7	8		0	22.749	By matching	By matching	By MS/MS	By MS/MS	By MS/MS	By MS/MS	0
O94979	O94979	5	5	5	Protein transport protein Sec31A	SEC31A	>O94979 Protein transport protein Sec31A OS=Homo sapiens OX=9606 GN=SEC31A PE=1 SV=3	1	5	5	5	4	5	4	4	5	5	4	5	4	4	5	5	4	5	4	4	5	5	4.1	4.1	4.1	133.01	1220	1220	3.07	5		10	12	0	10.143	By MS/MS	By MS/MS	By matching	By MS/MS	By MS/MS	By MS/MS	3.4
O94985	O94985	18	18	18	Calsyntenin-1;Soluble Alc-alpha;CTF1-alpha	CLSTN1	>O94985 Calsyntenin-1 OS=Homo sapiens OX=9606 GN=CLSTN1 PE=1 SV=1	1	18	18	18	13	13	16	16	17	15	13	13	16	16	17	15	13	13	16	16	17	15	20.7	20.7	20.7	109.79	981	981	2.83	17	17	48	32	0	107.74	By MS/MS	By MS/MS	By MS/MS	By MS/MS	By MS/MS	By MS/MS	15.1
O94991;Q9H5Y7;Q9H156	O94991;Q9H5Y7;Q9H156	2;1;1	2;1;1	2;1;1	SLIT and NTRK-like protein 5;SLIT and NTRK-like protein 6;SLIT and NTRK-like protein 2	SLITRK5;SLITRK6;SLITRK2	>O94991 SLIT and NTRK-like protein 5 OS=Homo sapiens OX=9606 GN=SLITRK5 PE=2 SV=2;>Q9H5Y7 SLIT and NTRK-like protein 6 OS=Homo sapiens OX=9606 GN=SLITRK6 PE=2 SV=3;>Q9H156 SLIT and NTRK-like protein 2 OS=Homo sapiens OX=9606 GN=SLITRK2 PE=1 SV=1	3	2	2	2	1	1	1	0	1	0	1	1	1	0	1	0	1	1	1	0	1	0	1.8	1.8	1.8	107.48	958	958;841;845	1	4				0.008342	1.511	By MS/MS	By matching	By matching	By matching	By MS/MS	By matching	1
O94992	O94992	2	2	2	Protein HEXIM1	HEXIM1	>O94992 Protein HEXIM1 OS=Homo sapiens OX=9606 GN=HEXIM1 PE=1 SV=1	1	2	2	2	1	2	1	2	1	2	1	2	1	2	1	2	1	2	1	2	1	2	6.1	6.1	6.1	40.623	359	359	1.44	5	4			0.0083638	1.5225	By matching	By MS/MS	By MS/MS	By MS/MS	By MS/MS	By matching	3.9
O95084	O95084	8	8	8	Serine protease 23	PRSS23	>O95084 Serine protease 23 OS=Homo sapiens OX=9606 GN=PRSS23 PE=1 SV=1	1	8	8	8	8	4	8	5	4	1	8	4	8	5	4	1	8	4	8	5	4	1	26.4	26.4	26.4	43.001	383	383	2.07	13	18	14	1	0	61.955	By MS/MS	By MS/MS	By MS/MS	By MS/MS	By MS/MS	By matching	26.4
O95302	O95302	3	3	3	Peptidyl-prolyl cis-trans isomerase FKBP9	FKBP9	>O95302 Peptidyl-prolyl cis-trans isomerase FKBP9 OS=Homo sapiens OX=9606 GN=FKBP9 PE=1 SV=2	1	3	3	3	1	1	0	2	3	3	1	1	0	2	3	3	1	1	0	2	3	3	6.1	6.1	6.1	63.083	570	570	2	5		5		0	3.875	By matching	By matching	By matching	By matching	By MS/MS	By MS/MS	3
O95336	O95336	3	3	3	6-phosphogluconolactonase	PGLS	>O95336 6-phosphogluconolactonase OS=Homo sapiens OX=9606 GN=PGLS PE=1 SV=2	1	3	3	3	3	3	2	2	3	2	3	3	2	2	3	2	3	3	2	2	3	2	14.7	14.7	14.7	27.547	258	258	2.8	4		6	5	0	5.5471	By MS/MS	By MS/MS	By matching	By MS/MS	By MS/MS	By MS/MS	14.7
O95372	O95372	2	2	2	Acyl-protein thioesterase 2	LYPLA2	>O95372 Acyl-protein thioesterase 2 OS=Homo sapiens OX=9606 GN=LYPLA2 PE=1 SV=1	1	2	2	2	1	2	1	1	1	0	1	2	1	1	1	0	1	2	1	1	1	0	6.9	6.9	6.9	24.737	231	231	2.17		5	1		0.0022485	1.9152	By MS/MS	By MS/MS	By matching	By MS/MS	By MS/MS	By matching	3.5
O95373	O95373	4	4	4	Importin-7	IPO7	>O95373 Importin-7 OS=Homo sapiens OX=9606 GN=IPO7 PE=1 SV=1	1	4	4	4	1	4	2	2	3	1	1	4	2	2	3	1	1	4	2	2	3	1	4.9	4.9	4.9	119.52	1038	1038	3.69			4	9	0	6.799	By MS/MS	By MS/MS	By MS/MS	By MS/MS	By MS/MS	By MS/MS	0.9
O95388	O95388	3	3	3	WNT1-inducible-signaling pathway protein 1	WISP1	>O95388 WNT1-inducible-signaling pathway protein 1 OS=Homo sapiens OX=9606 GN=WISP1 PE=1 SV=1	1	3	3	3	0	0	0	1	3	1	0	0	0	1	3	1	0	0	0	1	3	1	12	12	12	40.331	367	367	2.67		3	2	1	0	10.878	By matching	By matching	By matching	By matching	By MS/MS	By matching	0
O95394	O95394	6	6	6	Phosphoacetylglucosamine mutase	PGM3	>O95394 Phosphoacetylglucosamine mutase OS=Homo sapiens OX=9606 GN=PGM3 PE=1 SV=1	1	6	6	6	6	6	5	6	4	5	6	6	5	6	4	5	6	6	5	6	4	5	11.8	11.8	11.8	59.851	542	542	2.58	6	10	19	5	0	12.872	By MS/MS	By MS/MS	By MS/MS	By MS/MS	By MS/MS	By MS/MS	11.8
O95433	O95433	2	2	2	Activator of 90 kDa heat shock protein ATPase homolog 1	AHSA1	>O95433 Activator of 90 kDa heat shock protein ATPase homolog 1 OS=Homo sapiens OX=9606 GN=AHSA1 PE=1 SV=1	1	2	2	2	2	2	0	1	1	1	2	2	0	1	1	1	2	2	0	1	1	1	6.2	6.2	6.2	38.274	338	338	1.29	5	2			0.0048361	1.6594	By MS/MS	By matching	By matching	By MS/MS	By MS/MS	By matching	6.2
O95450	O95450	11	11	11	A disintegrin and metalloproteinase with thrombospondin motifs 2	ADAMTS2	>O95450 A disintegrin and metalloproteinase with thrombospondin motifs 2 OS=Homo sapiens OX=9606 GN=ADAMTS2 PE=2 SV=2	1	11	11	11	0	0	0	8	10	5	0	0	0	8	10	5	0	0	0	8	10	5	13.9	13.9	13.9	134.75	1211	1211	2.62	8	3	6	9	0	118.64	By matching	By matching	By matching	By MS/MS	By MS/MS	By MS/MS	0
O95502	O95502	2	2	2	Neuronal pentraxin receptor	NPTXR	>O95502 Neuronal pentraxin receptor OS=Homo sapiens OX=9606 GN=NPTXR PE=3 SV=2	1	2	2	2	0	1	0	1	1	0	0	1	0	1	1	0	0	1	0	1	1	0	6.4	6.4	6.4	52.846	500	500	3			3		0	4.1579	By matching	By MS/MS	By matching	By MS/MS	By MS/MS	By matching	0
O95571	O95571	2	2	2	Persulfide dioxygenase ETHE1, mitochondrial	ETHE1	>O95571 Persulfide dioxygenase ETHE1, mitochondrial OS=Homo sapiens OX=9606 GN=ETHE1 PE=1 SV=2	1	2	2	2	2	1	0	1	1	1	2	1	0	1	1	1	2	1	0	1	1	1	10.2	10.2	10.2	27.873	254	254	3.71		1		6	0	3.884	By MS/MS	By MS/MS	By matching	By MS/MS	By MS/MS	By matching	10.2
O95633	O95633	7	7	7	Follistatin-related protein 3	FSTL3	>O95633 Follistatin-related protein 3 OS=Homo sapiens OX=9606 GN=FSTL3 PE=1 SV=1	1	7	7	7	5	4	5	7	7	2	5	4	5	7	7	2	5	4	5	7	7	2	31.2	31.2	31.2	27.663	263	263	2.03	14	3	15		0	49.507	By MS/MS	By MS/MS	By MS/MS	By MS/MS	By MS/MS	By MS/MS	22.1
O95716	O95716	5	2	2	Ras-related protein Rab-3D	RAB3D	>O95716 Ras-related protein Rab-3D OS=Homo sapiens OX=9606 GN=RAB3D PE=1 SV=1	1	5	2	2	3	4	2	5	4	4	1	1	1	2	1	1	1	1	1	2	1	1	26.5	10.5	10.5	24.267	219	219	3.83		1		11	0.0018116	2.3193	By MS/MS	By MS/MS	By MS/MS	By MS/MS	By MS/MS	By MS/MS	12.3
O95747	O95747	3	3	3	Serine/threonine-protein kinase OSR1	OXSR1	>O95747 Serine/threonine-protein kinase OSR1 OS=Homo sapiens OX=9606 GN=OXSR1 PE=1 SV=1	1	3	3	3	2	2	1	2	2	2	2	2	1	2	2	2	2	2	1	2	2	2	8.5	8.5	8.5	58.022	527	527	2.38	2	10		4	0	18.46	By MS/MS	By MS/MS	By MS/MS	By MS/MS	By MS/MS	By MS/MS	5.7
O95757	O95757	4	4	4	Heat shock 70 kDa protein 4L	HSPA4L	>O95757 Heat shock 70 kDa protein 4L OS=Homo sapiens OX=9606 GN=HSPA4L PE=1 SV=3	1	4	4	4	2	3	1	2	1	1	2	3	1	2	1	1	2	3	1	2	1	1	5.8	5.8	5.8	94.511	839	839	2.36		9		2	0	8.3267	By MS/MS	By MS/MS	By MS/MS	By MS/MS	By MS/MS	By MS/MS	2.5
O95777	O95777	3	3	3	U6 snRNA-associated Sm-like protein LSm8	LSM8	>O95777 U6 snRNA-associated Sm-like protein LSm8 OS=Homo sapiens OX=9606 GN=LSM8 PE=1 SV=3	1	3	3	3	2	3	2	3	2	1	2	3	2	3	2	1	2	3	2	3	2	1	37.5	37.5	37.5	10.403	96	96	2.79		4	15		0	31.062	By MS/MS	By MS/MS	By MS/MS	By MS/MS	By MS/MS	By MS/MS	27.1
O95782;O94973	O95782	8;3	8;3	8;3	AP-2 complex subunit alpha-1	AP2A1	>O95782 AP-2 complex subunit alpha-1 OS=Homo sapiens OX=9606 GN=AP2A1 PE=1 SV=3	2	8	8	8	6	5	3	4	5	2	6	5	3	4	5	2	6	5	3	4	5	2	9.8	9.8	9.8	107.54	977	977;939	3.76		3		22	0	14.252	By MS/MS	By MS/MS	By MS/MS	By MS/MS	By MS/MS	By MS/MS	6.6
O95817	O95817	4	4	4	BAG family molecular chaperone regulator 3	BAG3	>O95817 BAG family molecular chaperone regulator 3 OS=Homo sapiens OX=9606 GN=BAG3 PE=1 SV=3	1	4	4	4	4	3	0	3	3	2	4	3	0	3	3	2	4	3	0	3	3	2	9	9	9	61.594	575	575	2.5	1	10	1	4	0	20.024	By MS/MS	By MS/MS	By matching	By MS/MS	By MS/MS	By MS/MS	9
O95834	O95834	3	3	3	Echinoderm microtubule-associated protein-like 2	EML2	>O95834 Echinoderm microtubule-associated protein-like 2 OS=Homo sapiens OX=9606 GN=EML2 PE=1 SV=1	1	3	3	3	2	3	2	2	1	2	2	3	2	2	1	2	2	3	2	2	1	2	5.2	5.2	5.2	70.678	649	649	2.92		6	1	5	0	10.922	By MS/MS	By MS/MS	By MS/MS	By MS/MS	By MS/MS	By MS/MS	3.7
O95841	O95841	4	4	4	Angiopoietin-related protein 1	ANGPTL1	>O95841 Angiopoietin-related protein 1 OS=Homo sapiens OX=9606 GN=ANGPTL1 PE=2 SV=1	1	4	4	4	0	0	0	0	4	1	0	0	0	0	4	1	0	0	0	0	4	1	8.8	8.8	8.8	56.719	491	491	2	3		1	1	0	8.7625	By matching	By matching	By matching	By matching	By MS/MS	By MS/MS	0
O95861	O95861	7	7	7	3(2),5-bisphosphate nucleotidase 1	BPNT1	>O95861 3(2),5-bisphosphate nucleotidase 1 OS=Homo sapiens OX=9606 GN=BPNT1 PE=1 SV=1	1	7	7	7	6	6	5	6	6	7	6	6	5	6	6	7	6	6	5	6	6	7	25	25	25	33.392	308	308	3.52	2	7	3	36	0	13.624	By MS/MS	By MS/MS	By MS/MS	By MS/MS	By MS/MS	By MS/MS	22.4
O95865	O95865	7	6	6	N(G),N(G)-dimethylarginine dimethylaminohydrolase 2	DDAH2	>O95865 N(G),N(G)-dimethylarginine dimethylaminohydrolase 2 OS=Homo sapiens OX=9606 GN=DDAH2 PE=1 SV=1	1	7	6	6	6	5	4	6	6	5	5	4	3	5	5	4	5	4	3	5	5	4	30.2	27.4	27.4	29.644	285	285	2.37	6	5	16		0	16.709	By MS/MS	By MS/MS	By MS/MS	By MS/MS	By MS/MS	By MS/MS	27.4
O95881	O95881	4	4	4	Thioredoxin domain-containing protein 12	TXNDC12	>O95881 Thioredoxin domain-containing protein 12 OS=Homo sapiens OX=9606 GN=TXNDC12 PE=1 SV=1	1	4	4	4	4	2	2	2	4	2	4	2	2	2	4	2	4	2	2	2	4	2	26.7	26.7	26.7	19.206	172	172	3.36		7		15	0	8.3298	By MS/MS	By MS/MS	By MS/MS	By MS/MS	By MS/MS	By MS/MS	26.7
O95967	O95967	5	5	5	EGF-containing fibulin-like extracellular matrix protein 2	EFEMP2	>O95967 EGF-containing fibulin-like extracellular matrix protein 2 OS=Homo sapiens OX=9606 GN=EFEMP2 PE=1 SV=3	1	5	5	5	1	0	1	2	5	4	1	0	1	2	5	4	1	0	1	2	5	4	12.6	12.6	12.6	49.405	443	443	1.71	8	4		2	0	6.8365	By MS/MS	By matching	By MS/MS	By MS/MS	By MS/MS	By MS/MS	2.7
O95989	O95989	3	3	3	Diphosphoinositol polyphosphate phosphohydrolase 1	NUDT3	>O95989 Diphosphoinositol polyphosphate phosphohydrolase 1 OS=Homo sapiens OX=9606 GN=NUDT3 PE=1 SV=1	1	3	3	3	1	3	0	1	2	2	1	3	0	1	2	2	1	3	0	1	2	2	20.3	20.3	20.3	19.471	172	172	2.11	5		2	2	0	9.4875	By MS/MS	By MS/MS	By matching	By MS/MS	By MS/MS	By MS/MS	8.1
O95994	O95994	5	5	4	Anterior gradient protein 2 homolog	AGR2	>O95994 Anterior gradient protein 2 homolog OS=Homo sapiens OX=9606 GN=AGR2 PE=1 SV=1	1	5	5	4	5	3	5	0	0	0	5	3	5	0	0	0	4	2	4	0	0	0	38.9	38.9	32.6	19.979	175	175	3.2		6	4	10	0	27.184	By MS/MS	By MS/MS	By MS/MS	By matching	By matching	By matching	38.9
P00167	P00167	3	3	3	Cytochrome b5	CYB5A	>P00167 Cytochrome b5 OS=Homo sapiens OX=9606 GN=CYB5A PE=1 SV=2	1	3	3	3	2	2	1	2	2	1	2	2	1	2	2	1	2	2	1	2	2	1	25.4	25.4	25.4	15.33	134	134	2.4		6	4		0	4.2322	By MS/MS	By MS/MS	By matching	By matching	By MS/MS	By matching	18.7
P00338;Q6ZMR3;P07864	P00338	13;1;1	13;1;1	12;0;0	L-lactate dehydrogenase A chain	LDHA	>P00338 L-lactate dehydrogenase A chain OS=Homo sapiens OX=9606 GN=LDHA PE=1 SV=2	3	13	13	12	13	12	12	12	12	12	13	12	12	12	12	12	12	11	11	11	11	11	41.9	41.9	38.3	36.688	332	332;332;332	2.52	30	32	25	34	0	75.112	By MS/MS	By MS/MS	By MS/MS	By MS/MS	By MS/MS	By MS/MS	41.9
P00352	P00352	10	9	8	Retinal dehydrogenase 1	ALDH1A1	>P00352 Retinal dehydrogenase 1 OS=Homo sapiens OX=9606 GN=ALDH1A1 PE=1 SV=2	1	10	9	8	10	10	10	10	10	9	9	9	9	9	9	8	8	8	8	8	8	8	21.8	20.2	18.8	54.861	501	501	2.66		31	28	8	0	67.099	By MS/MS	By MS/MS	By MS/MS	By MS/MS	By MS/MS	By MS/MS	21.8
P00367;P49448	P00367;P49448	11;8	11;8	11;8	Glutamate dehydrogenase 1, mitochondrial;Glutamate dehydrogenase 2, mitochondrial	GLUD1;GLUD2	>P00367 Glutamate dehydrogenase 1, mitochondrial OS=Homo sapiens OX=9606 GN=GLUD1 PE=1 SV=2;>P49448 Glutamate dehydrogenase 2, mitochondrial OS=Homo sapiens OX=9606 GN=GLUD2 PE=1 SV=2	2	11	11	11	3	8	6	7	10	6	3	8	6	7	10	6	3	8	6	7	10	6	22.6	22.6	22.6	61.397	558	558;558	2.65	8	9	24	8	0	44.887	By MS/MS	By MS/MS	By MS/MS	By MS/MS	By MS/MS	By MS/MS	6.8
P00390	P00390	2	2	2	Glutathione reductase, mitochondrial	GSR	>P00390 Glutathione reductase, mitochondrial OS=Homo sapiens OX=9606 GN=GSR PE=1 SV=2	1	2	2	2	0	2	1	2	1	1	0	2	1	2	1	1	0	2	1	2	1	1	4.8	4.8	4.8	56.256	522	522	3.43			4	3	0	3.7481	By matching	By MS/MS	By MS/MS	By MS/MS	By MS/MS	By MS/MS	0
P00441	P00441	3	3	3	Superoxide dismutase [Cu-Zn]	SOD1	>P00441 Superoxide dismutase [Cu-Zn] OS=Homo sapiens OX=9606 GN=SOD1 PE=1 SV=2	1	3	3	3	3	2	1	2	3	2	3	2	1	2	3	2	3	2	1	2	3	2	32.5	32.5	32.5	15.936	154	154	2.65		12	7	4	0	35.485	By MS/MS	By MS/MS	By MS/MS	By MS/MS	By MS/MS	By MS/MS	32.5
P00491	P00491	6	6	6	Purine nucleoside phosphorylase	PNP	>P00491 Purine nucleoside phosphorylase OS=Homo sapiens OX=9606 GN=PNP PE=1 SV=2	1	6	6	6	6	3	2	3	1	2	6	3	2	3	1	2	6	3	2	3	1	2	30.1	30.1	30.1	32.118	289	289	3.25		6	6	12	0	44.22	By MS/MS	By MS/MS	By MS/MS	By MS/MS	By matching	By matching	30.1
P00492	P00492	6	6	6	Hypoxanthine-guanine phosphoribosyltransferase	HPRT1	>P00492 Hypoxanthine-guanine phosphoribosyltransferase OS=Homo sapiens OX=9606 GN=HPRT1 PE=1 SV=2	1	6	6	6	5	6	4	6	6	5	5	6	4	6	6	5	5	6	4	6	6	5	32.1	32.1	32.1	24.579	218	218	2.46	6	13	13	5	0	20.738	By MS/MS	By MS/MS	By MS/MS	By MS/MS	By MS/MS	By MS/MS	26.1
P00505	P00505	10	10	10	Aspartate aminotransferase, mitochondrial	GOT2	>P00505 Aspartate aminotransferase, mitochondrial OS=Homo sapiens OX=9606 GN=GOT2 PE=1 SV=3	1	10	10	10	3	7	2	8	7	5	3	7	2	8	7	5	3	7	2	8	7	5	23.5	23.5	23.5	47.517	430	430	3.34	1	7	6	21	0	28.431	By MS/MS	By MS/MS	By MS/MS	By MS/MS	By MS/MS	By MS/MS	6.3
P00558;P07205	P00558	17;5	17;5	17;5	Phosphoglycerate kinase 1	PGK1	>P00558 Phosphoglycerate kinase 1 OS=Homo sapiens OX=9606 GN=PGK1 PE=1 SV=3	2	17	17	17	16	17	16	17	15	15	16	17	16	17	15	15	16	17	16	17	15	15	54	54	54	44.614	417	417;417	3.15	23	7	62	78	0	259.94	By MS/MS	By MS/MS	By MS/MS	By MS/MS	By MS/MS	By MS/MS	49.6
P00568;Q9Y6K8	P00568	5;1	5;1	5;1	Adenylate kinase isoenzyme 1	AK1	>P00568 Adenylate kinase isoenzyme 1 OS=Homo sapiens OX=9606 GN=AK1 PE=1 SV=3	2	5	5	5	3	4	3	5	5	3	3	4	3	5	5	3	3	4	3	5	5	3	28.4	28.4	28.4	21.635	194	194;562	2.27	8	5	11	2	0	10.186	By MS/MS	By MS/MS	By MS/MS	By MS/MS	By MS/MS	By MS/MS	18.6
P00736	P00736	23	23	22	Complement C1r subcomponent;Complement C1r subcomponent heavy chain;Complement C1r subcomponent light chain	C1R	>P00736 Complement C1r subcomponent OS=Homo sapiens OX=9606 GN=C1R PE=1 SV=2	1	23	23	22	2	1	4	15	21	22	2	1	4	15	21	22	2	1	4	14	20	21	44.1	44.1	42.8	80.118	705	705	2.81	13	28	18	36	0	323.31	By MS/MS	By matching	By matching	By MS/MS	By MS/MS	By MS/MS	2.3
P00738;P00739	P00738;P00739	6;5	6;5	6;5	Haptoglobin;Haptoglobin alpha chain;Haptoglobin beta chain;Haptoglobin-related protein	HP;HPR	>P00738 Haptoglobin OS=Homo sapiens OX=9606 GN=HP PE=1 SV=1;>P00739 Haptoglobin-related protein OS=Homo sapiens OX=9606 GN=HPR PE=2 SV=2	2	6	6	6	6	5	6	5	5	5	6	5	6	5	5	5	6	5	6	5	5	5	12.3	12.3	12.3	45.205	406	406;348	3	7	2	12	16	0	11.888	By MS/MS	By MS/MS	By MS/MS	By MS/MS	By MS/MS	By MS/MS	12.3
P00742	P00742	3	3	3	Coagulation factor X;Factor X light chain;Factor X heavy chain;Activated factor Xa heavy chain	F10	>P00742 Coagulation factor X OS=Homo sapiens OX=9606 GN=F10 PE=1 SV=2	1	3	3	3	1	1	1	1	3	2	1	1	1	1	3	2	1	1	1	1	3	2	6.8	6.8	6.8	54.731	488	488	2.89		1	8		0	5.6697	By MS/MS	By MS/MS	By matching	By matching	By MS/MS	By MS/MS	2.3
P00750	P00750	2	2	2	Tissue-type plasminogen activator;Tissue-type plasminogen activator chain A;Tissue-type plasminogen activator chain B	PLAT	>P00750 Tissue-type plasminogen activator OS=Homo sapiens OX=9606 GN=PLAT PE=1 SV=1	1	2	2	2	0	2	0	1	2	0	0	2	0	1	2	0	0	2	0	1	2	0	5.3	5.3	5.3	62.916	562	562	2		5			0.0023242	2.0836	By matching	By MS/MS	By matching	By MS/MS	By MS/MS	By matching	0
P00751	P00751	15	14	14	Complement factor B;Complement factor B Ba fragment;Complement factor B Bb fragment	CFB	>P00751 Complement factor B OS=Homo sapiens OX=9606 GN=CFB PE=1 SV=2	1	15	14	14	2	2	1	1	9	15	1	1	0	0	8	14	1	1	0	0	8	14	21.5	20.5	20.5	85.532	764	764	2.38	9	9	7	7	0	73.25	By matching	By matching	By matching	By matching	By MS/MS	By MS/MS	2.4
P00918	P00918	3	3	3	Carbonic anhydrase 2	CA2	>P00918 Carbonic anhydrase 2 OS=Homo sapiens OX=9606 GN=CA2 PE=1 SV=2	1	3	3	3	3	2	3	3	3	3	3	2	3	3	3	3	3	2	3	3	3	3	11.5	11.5	11.5	29.246	260	260	3.3		5	6	12	0	10.274	By MS/MS	By MS/MS	By MS/MS	By MS/MS	By MS/MS	By MS/MS	11.5
P01011	P01011	8	8	8	Alpha-1-antichymotrypsin;Alpha-1-antichymotrypsin His-Pro-less	SERPINA3	>P01011 Alpha-1-antichymotrypsin OS=Homo sapiens OX=9606 GN=SERPINA3 PE=1 SV=2	1	8	8	8	1	2	0	7	8	6	1	2	0	7	8	6	1	2	0	7	8	6	24.3	24.3	24.3	47.65	423	423	2.5	4	9	18	1	0	56.947	By matching	By matching	By matching	By MS/MS	By MS/MS	By MS/MS	2.4
P01024;O95568	P01024	48;1	39;1	39;1	Complement C3;Complement C3 beta chain;C3-beta-c;Complement C3 alpha chain;C3a anaphylatoxin;Acylation stimulating protein;Complement C3b alpha chain;Complement C3c alpha chain fragment 1;Complement C3dg fragment;Complement C3g fragment;Complement C3d fragment;Complement C3f fragment;Complement C3c alpha chain fragment 2	C3	>P01024 Complement C3 OS=Homo sapiens OX=9606 GN=C3 PE=1 SV=2	2	48	39	39	12	9	10	36	32	47	3	0	1	27	23	38	3	0	1	27	23	38	35.5	30.7	30.7	187.15	1663	1663;372	2.66	27	13	43	29	0	289.83	By matching	By matching	By matching	By MS/MS	By MS/MS	By MS/MS	7.5
P01033	P01033	7	7	7	Metalloproteinase inhibitor 1	TIMP1	>P01033 Metalloproteinase inhibitor 1 OS=Homo sapiens OX=9606 GN=TIMP1 PE=1 SV=1	1	7	7	7	6	5	7	7	7	7	6	5	7	7	7	7	6	5	7	7	7	7	45.4	45.4	45.4	23.171	207	207	2.85	20	26	31	47	0	295.74	By MS/MS	By MS/MS	By MS/MS	By MS/MS	By MS/MS	By MS/MS	37.7
P01034	P01034	6	6	6	Cystatin-C	CST3	>P01034 Cystatin-C OS=Homo sapiens OX=9606 GN=CST3 PE=1 SV=1	1	6	6	6	2	2	3	5	4	4	2	2	3	5	4	4	2	2	3	5	4	4	47.9	47.9	47.9	15.799	146	146	2.26	27	9	28	9	0	64.614	By MS/MS	By MS/MS	By MS/MS	By MS/MS	By MS/MS	By MS/MS	22.6
P01130	P01130	2	2	2	Low-density lipoprotein receptor	LDLR	>P01130 Low-density lipoprotein receptor OS=Homo sapiens OX=9606 GN=LDLR PE=1 SV=1	1	2	2	2	1	1	0	1	2	0	1	1	0	1	2	0	1	1	0	1	2	0	2.6	2.6	2.6	95.375	860	860	1.6	4			1	0.0018226	2.3495	By matching	By matching	By matching	By MS/MS	By MS/MS	By matching	1
P01137	P01137	4	4	4	Transforming growth factor beta-1;Latency-associated peptide	TGFB1	>P01137 Transforming growth factor beta-1 OS=Homo sapiens OX=9606 GN=TGFB1 PE=1 SV=2	1	4	4	4	0	0	0	2	4	3	0	0	0	2	4	3	0	0	0	2	4	3	9.5	9.5	9.5	44.341	390	390	1.89	1	8			0	10.271	By matching	By matching	By matching	By MS/MS	By MS/MS	By MS/MS	0
P01185;P01178	P01185	4;1	4;1	4;1	Vasopressin-neurophysin 2-copeptin;Arg-vasopressin;Neurophysin 2;Copeptin	AVP	>P01185 Vasopressin-neurophysin 2-copeptin OS=Homo sapiens OX=9606 GN=AVP PE=1 SV=2	2	4	4	4	4	3	3	4	3	4	4	3	3	4	3	4	4	3	3	4	3	4	22	22	22	17.325	164	164;125	2.1	16	53	4	10	0	53.169	By MS/MS	By MS/MS	By MS/MS	By MS/MS	By MS/MS	By MS/MS	22
P01189	P01189	3	3	3	Pro-opiomelanocortin;NPP;Melanotropin gamma;Potential peptide;Corticotropin;Melanotropin alpha;Corticotropin-like intermediary peptide;Lipotropin beta;Lipotropin gamma;Melanotropin beta;Beta-endorphin;Met-enkephalin	POMC	>P01189 Pro-opiomelanocortin OS=Homo sapiens OX=9606 GN=POMC PE=1 SV=2	1	3	3	3	3	2	2	3	3	3	3	2	2	3	3	3	3	2	2	3	3	3	9	9	9	29.424	267	267	3.17		6	17	12	0	5.8644	By MS/MS	By MS/MS	By MS/MS	By MS/MS	By MS/MS	By MS/MS	9
P01222	P01222	2	2	2	Thyrotropin subunit beta	TSHB	>P01222 Thyrotropin subunit beta OS=Homo sapiens OX=9606 GN=TSHB PE=1 SV=2	1	2	2	2	2	2	2	2	2	1	2	2	2	2	2	1	2	2	2	2	2	1	18.1	18.1	18.1	15.639	138	138	2.29		12	5		0	15.779	By MS/MS	By MS/MS	By MS/MS	By MS/MS	By MS/MS	By MS/MS	18.1
P01344	P01344	4	4	4	Insulin-like growth factor II;Insulin-like growth factor II;Insulin-like growth factor II Ala-25 Del;Preptin	IGF2	>P01344 Insulin-like growth factor II OS=Homo sapiens OX=9606 GN=IGF2 PE=1 SV=1	1	4	4	4	4	4	4	4	4	4	4	4	4	4	4	4	4	4	4	4	4	4	30	30	30	20.14	180	180	3.03		6	24	7	0	239.21	By MS/MS	By MS/MS	By MS/MS	By MS/MS	By MS/MS	By MS/MS	30
P02452;CON__Q862S4;Q15485	P02452	64;2;1	64;2;1	60;2;0	Collagen alpha-1(I) chain	COL1A1	>P02452 Collagen alpha-1(I) chain OS=Homo sapiens OX=9606 GN=COL1A1 PE=1 SV=5	3	64	64	60	34	30	5	62	60	61	34	30	5	62	60	61	33	28	5	58	56	57	63.2	63.2	61	138.94	1464	1464;114;313	2.37	153	173	215	84	0	323.31	By MS/MS	By MS/MS	By MS/MS	By MS/MS	By MS/MS	By MS/MS	32.2
P02461	P02461	60	60	45	Collagen alpha-1(III) chain	COL3A1	>P02461 Collagen alpha-1(III) chain OS=Homo sapiens OX=9606 GN=COL3A1 PE=1 SV=4	1	60	60	45	28	18	15	56	57	57	28	18	15	56	57	57	18	12	9	42	42	42	55.5	55.5	41.7	138.56	1466	1466	2.31	151	194	174	82	0	323.31	By MS/MS	By MS/MS	By MS/MS	By MS/MS	By MS/MS	By MS/MS	26.1
P02462	P02462	8	8	5	Collagen alpha-1(IV) chain;Arresten	COL4A1	>P02462 Collagen alpha-1(IV) chain OS=Homo sapiens OX=9606 GN=COL4A1 PE=1 SV=4	1	8	8	5	2	1	2	7	7	6	2	1	2	7	7	6	0	0	0	4	5	4	7.3	7.3	5.4	160.61	1669	1669	2.6	5	15	4	11	0	38.958	By MS/MS	By MS/MS	By matching	By MS/MS	By MS/MS	By MS/MS	1.4
P02545	P02545	25	25	25	Prelamin-A/C;Lamin-A/C	LMNA	>P02545 Prelamin-A/C OS=Homo sapiens OX=9606 GN=LMNA PE=1 SV=1	1	25	25	25	24	23	18	21	22	21	24	23	18	21	22	21	24	23	18	21	22	21	39.9	39.9	39.9	74.139	664	664	1.72	80	38	24	7	0	124.68	By MS/MS	By MS/MS	By MS/MS	By MS/MS	By MS/MS	By MS/MS	38.3
P02649	P02649	12	12	8	Apolipoprotein E	APOE	>P02649 Apolipoprotein E OS=Homo sapiens OX=9606 GN=APOE PE=1 SV=1	1	12	12	8	6	4	2	6	10	7	6	4	2	6	10	7	3	1	0	4	7	6	44.8	44.8	33.1	36.154	317	317	2.25	12	7	20	1	0	131.81	By MS/MS	By MS/MS	By MS/MS	By MS/MS	By MS/MS	By MS/MS	21.5
P02679	P02679	2	2	2	Fibrinogen gamma chain	FGG	>P02679 Fibrinogen gamma chain OS=Homo sapiens OX=9606 GN=FGG PE=1 SV=3	1	2	2	2	2	2	2	2	2	2	2	2	2	2	2	2	2	2	2	2	2	2	6	6	6	51.511	453	453	2.5	6		12	2	0	54.832	By MS/MS	By MS/MS	By MS/MS	By MS/MS	By MS/MS	By MS/MS	6
P02751	P02751	102	102	102	Fibronectin;Anastellin;Ugl-Y1;Ugl-Y2;Ugl-Y3	FN1	>P02751 Fibronectin OS=Homo sapiens OX=9606 GN=FN1 PE=1 SV=4	1	102	102	102	85	87	84	97	99	97	85	87	84	97	99	97	85	87	84	97	99	97	55.8	55.8	55.8	262.62	2386	2386	2.71	253	424	535	447	0	323.31	By MS/MS	By MS/MS	By MS/MS	By MS/MS	By MS/MS	By MS/MS	43
P02753	P02753	3	3	3	Retinol-binding protein 4;Plasma retinol-binding protein(1-182);Plasma retinol-binding protein(1-181);Plasma retinol-binding protein(1-179);Plasma retinol-binding protein(1-176)	RBP4	>P02753 Retinol-binding protein 4 OS=Homo sapiens OX=9606 GN=RBP4 PE=1 SV=3	1	3	3	3	3	2	1	2	2	2	3	2	1	2	2	2	3	2	1	2	2	2	20.4	20.4	20.4	23.01	201	201	2.12	7		9		0	27.615	By MS/MS	By MS/MS	By matching	By MS/MS	By MS/MS	By MS/MS	20.4
P02786	P02786	3	3	3	Transferrin receptor protein 1;Transferrin receptor protein 1, serum form	TFRC	>P02786 Transferrin receptor protein 1 OS=Homo sapiens OX=9606 GN=TFRC PE=1 SV=2	1	3	3	3	0	0	0	0	3	1	0	0	0	0	3	1	0	0	0	0	3	1	5.1	5.1	5.1	84.87	760	760	3.25	1			3	0	4.1972	By matching	By matching	By matching	By matching	By MS/MS	By matching	0
P02787	P02787	3	2	2	Serotransferrin	TF	>P02787 Serotransferrin OS=Homo sapiens OX=9606 GN=TF PE=1 SV=3	1	3	2	2	1	1	1	3	2	2	0	0	0	2	1	1	0	0	0	2	1	1	4.3	3.2	3.2	77.063	698	698	3		2	2	2	0.0022422	1.9081	By matching	By matching	By matching	By MS/MS	By MS/MS	By matching	1.1
P02794	P02794	4	4	4	Ferritin heavy chain;Ferritin heavy chain, N-terminally processed	FTH1	>P02794 Ferritin heavy chain OS=Homo sapiens OX=9606 GN=FTH1 PE=1 SV=2	1	4	4	4	3	3	2	3	4	3	3	3	2	3	4	3	3	3	2	3	4	3	24.6	24.6	24.6	21.225	183	183	3.05	2	4	6	9	0	6.455	By matching	By MS/MS	By MS/MS	By MS/MS	By MS/MS	By MS/MS	17.5
P03950	P03950	2	2	2	Angiogenin	ANG	>P03950 Angiogenin OS=Homo sapiens OX=9606 GN=ANG PE=1 SV=1	1	2	2	2	0	0	0	2	1	1	0	0	0	2	1	1	0	0	0	2	1	1	15	15	15	16.55	147	147	3.25	1			3	0	3.0789	By matching	By matching	By matching	By MS/MS	By matching	By matching	0
P03951;P03952	P03951;P03952	2;1	2;1	2;1	Coagulation factor XI;Coagulation factor XIa heavy chain;Coagulation factor XIa light chain;Plasma kallikrein;Plasma kallikrein heavy chain;Plasma kallikrein light chain	F11;KLKB1	>P03951 Coagulation factor XI OS=Homo sapiens OX=9606 GN=F11 PE=1 SV=1;>P03952 Plasma kallikrein OS=Homo sapiens OX=9606 GN=KLKB1 PE=1 SV=1	2	2	2	2	2	2	2	1	1	2	2	2	2	1	1	2	2	2	2	1	1	2	2.2	2.2	2.2	70.108	625	625;638	3.27		4		7	0	7.8302	By MS/MS	By MS/MS	By MS/MS	By matching	By MS/MS	By MS/MS	2.2
P03956	P03956	4	4	4	Interstitial collagenase;22 kDa interstitial collagenase;27 kDa interstitial collagenase	MMP1	>P03956 Interstitial collagenase OS=Homo sapiens OX=9606 GN=MMP1 PE=1 SV=3	1	4	4	4	0	2	0	0	3	2	0	2	0	0	3	2	0	2	0	0	3	2	10.2	10.2	10.2	54.006	469	469	3.29	1		2	4	0	7.528	By matching	By MS/MS	By matching	By matching	By MS/MS	By MS/MS	0
P04004	P04004	6	3	3	Vitronectin;Vitronectin V65 subunit;Vitronectin V10 subunit;Somatomedin-B	VTN	>P04004 Vitronectin OS=Homo sapiens OX=9606 GN=VTN PE=1 SV=1	1	6	3	3	2	2	2	3	5	6	0	0	0	1	3	3	0	0	0	1	3	3	13.2	6.5	6.5	54.305	478	478	2	4	1		2	0	4.4446	By matching	By matching	By matching	By matching	By MS/MS	By MS/MS	5
P04040	P04040	7	7	7	Catalase	CAT	>P04040 Catalase OS=Homo sapiens OX=9606 GN=CAT PE=1 SV=3	1	7	7	7	6	7	6	7	7	7	6	7	6	7	7	7	6	7	6	7	7	7	15.4	15.4	15.4	59.755	527	527	2.57	5	10	31		0	89.82	By MS/MS	By MS/MS	By MS/MS	By MS/MS	By MS/MS	By MS/MS	13.7
P04066	P04066	3	3	3	Tissue alpha-L-fucosidase	FUCA1	>P04066 Tissue alpha-L-fucosidase OS=Homo sapiens OX=9606 GN=FUCA1 PE=1 SV=4	1	3	3	3	3	3	3	3	3	3	3	3	3	3	3	3	3	3	3	3	3	3	6.9	6.9	6.9	53.688	466	466	3.33			12	6	0	4.2161	By MS/MS	By MS/MS	By MS/MS	By MS/MS	By MS/MS	By MS/MS	6.9
P04075	P04075	22	22	18	Fructose-bisphosphate aldolase A	ALDOA	>P04075 Fructose-bisphosphate aldolase A OS=Homo sapiens OX=9606 GN=ALDOA PE=1 SV=2	1	22	22	18	18	16	16	18	21	17	18	16	16	18	21	17	16	14	13	15	17	14	73.4	73.4	61.8	39.42	364	364	2.74	51	27	62	73	0	323.31	By MS/MS	By MS/MS	By MS/MS	By MS/MS	By MS/MS	By MS/MS	61.5
P04080	P04080	3	3	3	Cystatin-B	CSTB	>P04080 Cystatin-B OS=Homo sapiens OX=9606 GN=CSTB PE=1 SV=2	1	3	3	3	3	2	2	3	2	2	3	2	2	3	2	2	3	2	2	3	2	2	58.2	58.2	58.2	11.139	98	98	3.24		7	2	12	0	37.347	By MS/MS	By MS/MS	By MS/MS	By MS/MS	By MS/MS	By MS/MS	58.2
P04083	P04083	18	18	18	Annexin A1	ANXA1	>P04083 Annexin A1 OS=Homo sapiens OX=9606 GN=ANXA1 PE=1 SV=2	1	18	18	18	17	15	18	17	15	13	17	15	18	17	15	13	17	15	18	17	15	13	60.1	60.1	60.1	38.714	346	346	2.62	29	18	54	27	0	221.52	By MS/MS	By MS/MS	By MS/MS	By MS/MS	By MS/MS	By MS/MS	57.5
P04179	P04179	3	3	3	Superoxide dismutase [Mn], mitochondrial	SOD2	>P04179 Superoxide dismutase [Mn], mitochondrial OS=Homo sapiens OX=9606 GN=SOD2 PE=1 SV=3	1	3	3	3	2	1	1	3	3	3	2	1	1	3	3	3	2	1	1	3	3	3	13.1	13.1	13.1	24.75	222	222	2.29	3	4	7		0	5.8097	By MS/MS	By MS/MS	By MS/MS	By MS/MS	By MS/MS	By MS/MS	9.9
P04271	P04271	2	2	2	Protein S100-B	S100B	>P04271 Protein S100-B OS=Homo sapiens OX=9606 GN=S100B PE=1 SV=2	1	2	2	2	2	2	1	2	2	2	2	2	1	2	2	2	2	2	1	2	2	2	23.9	23.9	23.9	10.713	92	92	3			21		0	151.52	By MS/MS	By MS/MS	By MS/MS	By MS/MS	By MS/MS	By MS/MS	23.9
P04406;O14556	P04406	15;1	15;1	15;1	Glyceraldehyde-3-phosphate dehydrogenase	GAPDH	>P04406 Glyceraldehyde-3-phosphate dehydrogenase OS=Homo sapiens OX=9606 GN=GAPDH PE=1 SV=3	2	15	15	15	13	11	11	13	14	10	13	11	11	13	14	10	13	11	11	13	14	10	68.1	68.1	68.1	36.053	335	335;408	3.01	29	21	49	81	0	252.41	By MS/MS	By MS/MS	By MS/MS	By MS/MS	By MS/MS	By MS/MS	54.3
P04632	P04632	3	3	3	Calpain small subunit 1	CAPNS1	>P04632 Calpain small subunit 1 OS=Homo sapiens OX=9606 GN=CAPNS1 PE=1 SV=1	1	3	3	3	1	2	1	3	3	1	1	2	1	3	3	1	1	2	1	3	3	1	14.2	14.2	14.2	28.315	268	268	1.67	4	8			0	29.274	By MS/MS	By MS/MS	By MS/MS	By MS/MS	By MS/MS	By MS/MS	4.9
P04792	P04792	5	5	5	Heat shock protein beta-1	HSPB1	>P04792 Heat shock protein beta-1 OS=Homo sapiens OX=9606 GN=HSPB1 PE=1 SV=2	1	5	5	5	5	5	4	5	5	4	5	5	4	5	5	4	5	5	4	5	5	4	30.2	30.2	30.2	22.782	205	205	2.12	12	6	14	1	0	31.189	By MS/MS	By MS/MS	By MS/MS	By MS/MS	By MS/MS	By MS/MS	30.2
P04899;P63096;P08754	P04899;P63096;P08754	6;4;4	4;2;2	4;2;2	Guanine nucleotide-binding protein G(i) subunit alpha-2;Guanine nucleotide-binding protein G(i) subunit alpha-1;Guanine nucleotide-binding protein G(k) subunit alpha	GNAI2;GNAI1;GNAI3	>P04899 Guanine nucleotide-binding protein G(i) subunit alpha-2 OS=Homo sapiens OX=9606 GN=GNAI2 PE=1 SV=3;>P63096 Guanine nucleotide-binding protein G(i) subunit alpha-1 OS=Homo sapiens OX=9606 GN=GNAI1 PE=1 SV=2;>P08754 Guanine nucleotide-binding protein	3	6	4	4	4	5	3	4	4	3	2	3	1	2	2	1	2	3	1	2	2	1	21.1	14.6	14.6	40.45	355	355;354;354	3.08			11	1	0	10.683	By MS/MS	By MS/MS	By matching	By MS/MS	By MS/MS	By MS/MS	12.7
P05023;P50993;Q13733;P54707;P20648	P05023	13;6;4;3;2	13;6;4;3;2	6;0;0;0;0	Sodium/potassium-transporting ATPase subunit alpha-1	ATP1A1	>P05023 Sodium/potassium-transporting ATPase subunit alpha-1 OS=Homo sapiens OX=9606 GN=ATP1A1 PE=1 SV=1	5	13	13	6	7	8	3	7	10	4	7	8	3	7	10	4	2	3	0	3	6	2	15.4	15.4	6.8	112.89	1023	1023;1020;1029;1039;1035	3.19		7	21	15	0	26.395	By MS/MS	By MS/MS	By MS/MS	By MS/MS	By MS/MS	By MS/MS	8.2
P05060	P05060	3	3	3	Secretogranin-1;GAWK peptide;CCB peptide	CHGB	>P05060 Secretogranin-1 OS=Homo sapiens OX=9606 GN=CHGB PE=1 SV=2	1	3	3	3	2	1	2	3	3	2	2	1	2	3	3	2	2	1	2	3	3	2	5.3	5.3	5.3	78.275	677	677	2.72	6	1	3	8	0	49.261	By MS/MS	By MS/MS	By MS/MS	By MS/MS	By MS/MS	By MS/MS	3.2
P05062	P05062	2	2	2	Fructose-bisphosphate aldolase B	ALDOB	>P05062 Fructose-bisphosphate aldolase B OS=Homo sapiens OX=9606 GN=ALDOB PE=1 SV=2	1	2	2	2	1	2	1	0	0	0	1	2	1	0	0	0	1	2	1	0	0	0	8	8	8	39.473	364	364	3.75			1	3	0.0022689	1.9734	By matching	By MS/MS	By MS/MS	By matching	By matching	By matching	4.4
P05067	P05067	14	14	13	Amyloid beta A4 protein;N-APP;Soluble APP-alpha;Soluble APP-beta;C99;Beta-amyloid protein 42;Beta-amyloid protein 40;C83;P3(42);P3(40);C80;Gamma-secretase C-terminal fragment 59;Gamma-secretase C-terminal fragment 57;Gamma-secretase C-terminal fragment 50;C31	APP	>P05067 Amyloid-beta A4 protein OS=Homo sapiens OX=9606 GN=APP PE=1 SV=3	1	14	14	13	9	7	10	11	14	11	9	7	10	11	14	11	9	7	9	11	13	11	23.6	23.6	22.6	86.942	770	770	2.63	16	20	34	19	0	68.185	By MS/MS	By MS/MS	By MS/MS	By MS/MS	By MS/MS	By MS/MS	15.1
P05090	P05090	4	4	4	Apolipoprotein D	APOD	>P05090 Apolipoprotein D OS=Homo sapiens OX=9606 GN=APOD PE=1 SV=1	1	4	4	4	1	1	1	1	2	4	1	1	1	1	2	4	1	1	1	1	2	4	22.2	22.2	22.2	21.275	189	189	1.58	6	5	1		0	12.923	By matching	By matching	By matching	By matching	By matching	By MS/MS	3.7
P05091	P05091	9	7	7	Aldehyde dehydrogenase, mitochondrial	ALDH2	>P05091 Aldehyde dehydrogenase, mitochondrial OS=Homo sapiens OX=9606 GN=ALDH2 PE=1 SV=2	1	9	7	7	6	7	6	7	9	5	4	5	4	5	7	4	4	5	4	5	7	4	24.2	21.3	21.3	56.381	517	517	3.22	6	1	8	21	0	36.317	By MS/MS	By MS/MS	By MS/MS	By MS/MS	By MS/MS	By MS/MS	13.2
P05120	P05120	11	11	11	Plasminogen activator inhibitor 2	SERPINB2	>P05120 Plasminogen activator inhibitor 2 OS=Homo sapiens OX=9606 GN=SERPINB2 PE=1 SV=2	1	11	11	11	1	9	11	0	6	2	1	9	11	0	6	2	1	9	11	0	6	2	33.5	33.5	33.5	46.596	415	415	2.19	7	18	8	3	0	51.024	By matching	By MS/MS	By MS/MS	By matching	By MS/MS	By MS/MS	4.6
P05121	P05121	20	20	20	Plasminogen activator inhibitor 1	SERPINE1	>P05121 Plasminogen activator inhibitor 1 OS=Homo sapiens OX=9606 GN=SERPINE1 PE=1 SV=1	1	20	20	20	18	19	18	20	20	19	18	19	18	20	20	19	18	19	18	20	20	19	49.3	49.3	49.3	45.059	402	402	2.93	29	64	87	103	0	323.31	By MS/MS	By MS/MS	By MS/MS	By MS/MS	By MS/MS	By MS/MS	49.3
P05155	P05155	8	6	6	Plasma protease C1 inhibitor	SERPING1	>P05155 Plasma protease C1 inhibitor OS=Homo sapiens OX=9606 GN=SERPING1 PE=1 SV=2	1	8	6	6	6	1	6	2	2	3	4	0	4	0	2	3	4	0	4	0	2	3	17	14.2	14.2	55.154	500	500	2.79	4		5	5	0	10.949	By MS/MS	By matching	By MS/MS	By matching	By matching	By MS/MS	12.8
P05198	P05198	8	8	8	Eukaryotic translation initiation factor 2 subunit 1	EIF2S1	>P05198 Eukaryotic translation initiation factor 2 subunit 1 OS=Homo sapiens OX=9606 GN=EIF2S1 PE=1 SV=3	1	8	8	8	5	4	4	5	7	6	5	4	4	5	7	6	5	4	4	5	7	6	28.3	28.3	28.3	36.112	315	315	2.7	1	14	12	6	0	21.262	By MS/MS	By MS/MS	By MS/MS	By MS/MS	By MS/MS	By MS/MS	15.2
P05231	P05231	2	2	2	Interleukin-6	IL6	>P05231 Interleukin-6 OS=Homo sapiens OX=9606 GN=IL6 PE=1 SV=1	1	2	2	2	0	0	0	2	0	1	0	0	0	2	0	1	0	0	0	2	0	1	9.4	9.4	9.4	23.718	212	212	1.33	2	1			0.0017815	2.222	By matching	By matching	By matching	By MS/MS	By matching	By MS/MS	0
P05387	P05387	4	4	4	60S acidic ribosomal protein P2	RPLP2	>P05387 60S acidic ribosomal protein P2 OS=Homo sapiens OX=9606 GN=RPLP2 PE=1 SV=1	1	4	4	4	4	4	2	4	4	2	4	4	2	4	4	2	4	4	2	4	4	2	31.3	31.3	31.3	11.665	115	115	2.17	2	15	6		0	45.381	By MS/MS	By MS/MS	By matching	By MS/MS	By MS/MS	By MS/MS	31.3
P05388;Q8NHW5	P05388;Q8NHW5	8;5	8;5	8;5	60S acidic ribosomal protein P0;60S acidic ribosomal protein P0-like	RPLP0;RPLP0P6	>P05388 60S acidic ribosomal protein P0 OS=Homo sapiens OX=9606 GN=RPLP0 PE=1 SV=1;>Q8NHW5 60S acidic ribosomal protein P0-like OS=Homo sapiens OX=9606 GN=RPLP0P6 PE=5 SV=1	2	8	8	8	5	5	2	4	8	3	5	5	2	4	8	3	5	5	2	4	8	3	34.4	34.4	34.4	34.273	317	317;317	2.61	11	2	6	12	0	29.209	By MS/MS	By MS/MS	By MS/MS	By MS/MS	By MS/MS	By MS/MS	23.7
P05408	P05408	3	3	3	Neuroendocrine protein 7B2;N-terminal peptide;C-terminal peptide	SCG5	>P05408 Neuroendocrine protein 7B2 OS=Homo sapiens OX=9606 GN=SCG5 PE=1 SV=2	1	3	3	3	2	2	1	3	3	2	2	2	1	3	3	2	2	2	1	3	3	2	18.4	18.4	18.4	23.729	212	212	1.96	1	23			0	30.898	By MS/MS	By MS/MS	By MS/MS	By MS/MS	By MS/MS	By MS/MS	12.3
P05413	P05413	5	5	4	Fatty acid-binding protein, heart	FABP3	>P05413 Fatty acid-binding protein, heart OS=Homo sapiens OX=9606 GN=FABP3 PE=1 SV=4	1	5	5	4	4	4	1	3	3	3	4	4	1	3	3	3	3	3	1	2	2	2	45.1	45.1	39.8	14.858	133	133	2.42	4	6	6	3	0	7.3535	By MS/MS	By MS/MS	By matching	By MS/MS	By MS/MS	By MS/MS	38.3
P05455	P05455	7	7	7	Lupus La protein	SSB	>P05455 Lupus La protein OS=Homo sapiens OX=9606 GN=SSB PE=1 SV=2	1	7	7	7	6	3	3	4	7	2	6	3	3	4	7	2	6	3	3	4	7	2	19.9	19.9	19.9	46.836	408	408	1.67	15	9		3	0	25.652	By MS/MS	By MS/MS	By matching	By MS/MS	By MS/MS	By MS/MS	17.2
P05556	P05556	6	6	6	Integrin beta-1	ITGB1	>P05556 Integrin beta-1 OS=Homo sapiens OX=9606 GN=ITGB1 PE=1 SV=2	1	6	6	6	1	2	0	4	5	1	1	2	0	4	5	1	1	2	0	4	5	1	9.5	9.5	9.5	88.414	798	798	3.08		3	6	4	0	12.273	By matching	By MS/MS	By matching	By MS/MS	By MS/MS	By matching	1
P05783;CON__H-INV:HIT000015463	P05783	10;1	8;1	6;1	Keratin, type I cytoskeletal 18	KRT18	>P05783 Keratin, type I cytoskeletal 18 OS=Homo sapiens OX=9606 GN=KRT18 PE=1 SV=2	2	10	8	6	10	7	1	7	7	6	8	6	0	5	5	4	6	4	0	3	3	2	26.5	22.8	18.8	48.057	430	430;295	1.94	9	17	3	2	0	13.756	By MS/MS	By MS/MS	By matching	By MS/MS	By MS/MS	By MS/MS	26.5
P05997	P05997	39	39	38	Collagen alpha-2(V) chain	COL5A2	>P05997 Collagen alpha-2(V) chain OS=Homo sapiens OX=9606 GN=COL5A2 PE=1 SV=3	1	39	39	38	0	3	0	35	33	36	0	3	0	35	33	36	0	3	0	34	33	35	38.8	38.8	38	144.91	1499	1499	2.62	20	57	64	31	0	323.31	By matching	By matching	By matching	By MS/MS	By MS/MS	By MS/MS	0
P06396	P06396	20	8	8	Gelsolin	GSN	>P06396 Gelsolin OS=Homo sapiens OX=9606 GN=GSN PE=1 SV=1	1	20	8	8	19	16	18	15	14	15	7	5	7	4	2	4	7	5	7	4	2	4	33.6	17.8	17.8	85.696	782	782	2.69	1	11	26	1	0	256.43	By MS/MS	By MS/MS	By MS/MS	By MS/MS	By MS/MS	By MS/MS	32
P06454	P06454	2	2	2	Prothymosin alpha;Prothymosin alpha, N-terminally processed;Thymosin alpha-1	PTMA	>P06454 Prothymosin alpha OS=Homo sapiens OX=9606 GN=PTMA PE=1 SV=2	1	2	2	2	1	2	1	2	1	1	1	2	1	2	1	1	1	2	1	2	1	1	15.3	15.3	15.3	12.203	111	111	1	8				0	18.092	By MS/MS	By MS/MS	By MS/MS	By MS/MS	By MS/MS	By MS/MS	12.6
P06576	P06576	13	13	13	ATP synthase subunit beta, mitochondrial	ATP5B	>P06576 ATP synthase subunit beta, mitochondrial OS=Homo sapiens OX=9606 GN=ATP5F1B PE=1 SV=3	1	13	13	13	10	11	7	10	10	8	10	11	7	10	10	8	10	11	7	10	10	8	37.4	37.4	37.4	56.559	529	529	3.03	8	13	39	32	0	310.03	By MS/MS	By MS/MS	By MS/MS	By MS/MS	By MS/MS	By MS/MS	28
P06703	P06703	3	3	3	Protein S100-A6	S100A6	>P06703 Protein S100-A6 OS=Homo sapiens OX=9606 GN=S100A6 PE=1 SV=1	1	3	3	3	3	2	2	2	3	2	3	2	2	2	3	2	3	2	2	2	3	2	24.4	24.4	24.4	10.18	90	90	1	14				0	10.14	By MS/MS	By MS/MS	By MS/MS	By MS/MS	By MS/MS	By MS/MS	24.4
P06730	P06730	2	2	2	Eukaryotic translation initiation factor 4E	EIF4E	>P06730 Eukaryotic translation initiation factor 4E OS=Homo sapiens OX=9606 GN=EIF4E PE=1 SV=2	1	2	2	2	1	1	1	1	1	1	1	1	1	1	1	1	1	1	1	1	1	1	12	12	12	25.097	217	217	1.17	5	1			0	2.9663	By MS/MS	By matching	By matching	By MS/MS	By MS/MS	By matching	5.1
P06732	P06732	7	5	5	Creatine kinase M-type;Creatine kinase M-type, N-terminally processed	CKM	>P06732 Creatine kinase M-type OS=Homo sapiens OX=9606 GN=CKM PE=1 SV=2	1	7	5	5	6	4	5	2	2	3	4	2	3	0	0	1	4	2	3	0	0	1	23.1	17.6	17.6	43.101	381	381	2.5	3		6	1	0	17.615	By MS/MS	By matching	By MS/MS	By matching	By matching	By matching	21.3
P06733	P06733	20	20	17	Alpha-enolase	ENO1	>P06733 Alpha-enolase OS=Homo sapiens OX=9606 GN=ENO1 PE=1 SV=2	1	20	20	17	19	16	15	17	18	17	19	16	15	17	18	17	16	14	13	15	16	15	63.4	63.4	50.7	47.168	434	434	2.69	40	35	61	56	0	323.31	By MS/MS	By MS/MS	By MS/MS	By MS/MS	By MS/MS	By MS/MS	58.5
P06737	P06737	11	11	7	Glycogen phosphorylase, liver form	PYGL	>P06737 Glycogen phosphorylase, liver form OS=Homo sapiens OX=9606 GN=PYGL PE=1 SV=4	1	11	11	7	9	6	5	4	2	3	9	6	5	4	2	3	6	2	3	2	0	1	13.5	13.5	9.2	97.147	847	847	2.83	1	13	5	10	0	18.085	By MS/MS	By MS/MS	By MS/MS	By MS/MS	By matching	By MS/MS	11.1
P06744	P06744	13	7	7	Glucose-6-phosphate isomerase	GPI	>P06744 Glucose-6-phosphate isomerase OS=Homo sapiens OX=9606 GN=GPI PE=1 SV=4	1	13	7	7	9	8	4	8	10	9	4	4	1	4	7	6	4	4	1	4	7	6	27.6	15.4	15.4	63.146	558	558	2.54	5	8	10	5	0	15.553	By MS/MS	By MS/MS	By MS/MS	By MS/MS	By MS/MS	By MS/MS	20.3
P06748	P06748	6	6	6	Nucleophosmin	NPM1	>P06748 Nucleophosmin OS=Homo sapiens OX=9606 GN=NPM1 PE=1 SV=2	1	6	6	6	4	4	4	5	6	4	4	4	4	5	6	4	4	4	4	5	6	4	29.9	29.9	29.9	32.575	294	294	2.22	14	10	9	7	0	164.01	By MS/MS	By MS/MS	By MS/MS	By MS/MS	By MS/MS	By MS/MS	18.7
P06753	P06753	11	8	5	Tropomyosin alpha-3 chain	TPM3	>P06753 Tropomyosin alpha-3 chain OS=Homo sapiens OX=9606 GN=TPM3 PE=1 SV=2	1	11	8	5	10	10	10	10	11	10	8	8	8	7	8	8	5	5	5	4	5	5	38.2	29.8	18.9	32.95	285	285	1.59	50	30	12		0	199.33	By MS/MS	By MS/MS	By MS/MS	By MS/MS	By MS/MS	By MS/MS	35.8
P06865	P06865	8	8	8	Beta-hexosaminidase subunit alpha	HEXA	>P06865 Beta-hexosaminidase subunit alpha OS=Homo sapiens OX=9606 GN=HEXA PE=1 SV=2	1	8	8	8	8	7	7	7	8	5	8	7	7	7	8	5	8	7	7	7	8	5	15.1	15.1	15.1	60.702	529	529	2.78	5	13	26	11	0	21.892	By MS/MS	By MS/MS	By MS/MS	By MS/MS	By MS/MS	By MS/MS	15.1
P07093	P07093	17	17	17	Glia-derived nexin	SERPINE2	>P07093 Glia-derived nexin OS=Homo sapiens OX=9606 GN=SERPINE2 PE=1 SV=1	1	17	17	17	12	9	9	16	16	14	12	9	9	16	16	14	12	9	9	16	16	14	46.2	46.2	46.2	44.002	398	398	2.99	34	14	28	81	0	169.23	By MS/MS	By MS/MS	By MS/MS	By MS/MS	By MS/MS	By MS/MS	36.7
P07108	P07108	7	7	7	Acyl-CoA-binding protein	DBI	>P07108 Acyl-CoA-binding protein OS=Homo sapiens OX=9606 GN=DBI PE=1 SV=2	1	7	7	7	4	4	2	7	7	5	4	4	2	7	7	5	4	4	2	7	7	5	70.1	70.1	70.1	10.044	87	87	2.26	8	7	16		0	59.305	By MS/MS	By MS/MS	By MS/MS	By MS/MS	By MS/MS	By MS/MS	43.7
P07195	P07195	11	10	10	L-lactate dehydrogenase B chain	LDHB	>P07195 L-lactate dehydrogenase B chain OS=Homo sapiens OX=9606 GN=LDHB PE=1 SV=2	1	11	10	10	11	10	6	10	10	9	10	9	5	9	9	8	10	9	5	9	9	8	41.3	37.7	37.7	36.638	334	334	2.73	7	16	23	14	0	42.493	By MS/MS	By MS/MS	By MS/MS	By MS/MS	By MS/MS	By MS/MS	41.3
P07203	P07203	2	2	2	Glutathione peroxidase 1	GPX1	>P07203 Glutathione peroxidase 1 OS=Homo sapiens OX=9606 GN=GPX1 PE=1 SV=4	1	2	2	2	1	1	1	1	2	1	1	1	1	1	2	1	1	1	1	1	2	1	16.3	16.3	16.3	22.088	203	203	1.43	6			1	0	14.618	By MS/MS	By MS/MS	By MS/MS	By MS/MS	By MS/MS	By MS/MS	9.4
P07237	P07237	22	22	22	Protein disulfide-isomerase	P4HB	>P07237 Protein disulfide-isomerase OS=Homo sapiens OX=9606 GN=P4HB PE=1 SV=3	1	22	22	22	18	22	17	20	22	21	18	22	17	20	22	21	18	22	17	20	22	21	46.3	46.3	46.3	57.116	508	508	2.27	59	44	52	28	0	322.83	By MS/MS	By MS/MS	By MS/MS	By MS/MS	By MS/MS	By MS/MS	34.4
P07311	P07311	2	2	2	Acylphosphatase-1	ACYP1	>P07311 Acylphosphatase-1 OS=Homo sapiens OX=9606 GN=ACYP1 PE=1 SV=2	1	2	2	2	2	2	1	2	2	2	2	2	1	2	2	2	2	2	1	2	2	2	23.2	23.2	23.2	11.261	99	99	3.55			5	6	0	3.3401	By MS/MS	By MS/MS	By MS/MS	By MS/MS	By MS/MS	By MS/MS	23.2
P07339	P07339	11	11	11	Cathepsin D;Cathepsin D light chain;Cathepsin D heavy chain	CTSD	>P07339 Cathepsin D OS=Homo sapiens OX=9606 GN=CTSD PE=1 SV=1	1	11	11	11	9	8	10	7	10	6	9	8	10	7	10	6	9	8	10	7	10	6	35.7	35.7	35.7	44.552	412	412	2.89	18	5	15	33	0	71.075	By MS/MS	By MS/MS	By MS/MS	By MS/MS	By MS/MS	By MS/MS	28.4
P07355;A6NMY6	P07355;A6NMY6	18;13	18;13	18;13	Annexin A2;Putative annexin A2-like protein	ANXA2;ANXA2P2	>P07355 Annexin A2 OS=Homo sapiens OX=9606 GN=ANXA2 PE=1 SV=2;>A6NMY6 Putative annexin A2-like protein OS=Homo sapiens OX=9606 GN=ANXA2P2 PE=5 SV=2	2	18	18	18	18	14	16	15	16	16	18	14	16	15	16	16	18	14	16	15	16	16	62.8	62.8	62.8	38.604	339	339;339	2.31	65	20	48	34	0	323.31	By MS/MS	By MS/MS	By MS/MS	By MS/MS	By MS/MS	By MS/MS	62.8
P07358	P07358	2	2	2	Complement component C8 beta chain	C8B	>P07358 Complement component C8 beta chain OS=Homo sapiens OX=9606 GN=C8B PE=1 SV=3	1	2	2	2	1	1	2	1	2	1	1	1	2	1	2	1	1	1	2	1	2	1	3.4	3.4	3.4	67.046	591	591	1.62	3	5			0	6.4063	By MS/MS	By MS/MS	By MS/MS	By matching	By matching	By matching	1.9
P07384	P07384	6	6	6	Calpain-1 catalytic subunit	CAPN1	>P07384 Calpain-1 catalytic subunit OS=Homo sapiens OX=9606 GN=CAPN1 PE=1 SV=1	1	6	6	6	5	6	2	3	3	4	5	6	2	3	3	4	5	6	2	3	3	4	9.1	9.1	9.1	81.889	714	714	2.87	2	4	12	5	0	8.8223	By MS/MS	By MS/MS	By MS/MS	By MS/MS	By MS/MS	By MS/MS	6.7
P07437;A6NNZ2	P07437	14;5	4;0	3;0	Tubulin beta chain	TUBB	>P07437 Tubulin beta chain OS=Homo sapiens OX=9606 GN=TUBB PE=1 SV=2	2	14	4	3	14	11	10	13	12	9	4	3	3	4	4	3	3	2	2	3	3	2	40.8	15.5	12.2	49.67	444	444;444	3.28	1	1	21	13	0	93.953	By MS/MS	By MS/MS	By MS/MS	By MS/MS	By MS/MS	By MS/MS	40.8
P07585	P07585	10	10	9	Decorin	DCN	>P07585 Decorin OS=Homo sapiens OX=9606 GN=DCN PE=1 SV=1	1	10	10	9	2	5	9	9	10	10	2	5	9	9	10	10	2	4	8	8	9	9	30.1	30.1	27.9	39.746	359	359	2.63	25	29	38	33	0	232.11	By MS/MS	By MS/MS	By MS/MS	By MS/MS	By MS/MS	By MS/MS	5.6
P07602	P07602	22	22	22	Prosaposin;Saposin-A;Saposin-B-Val;Saposin-B;Saposin-C;Saposin-D	PSAP	>P07602 Prosaposin OS=Homo sapiens OX=9606 GN=PSAP PE=1 SV=2	1	22	22	22	22	20	22	19	20	18	22	20	22	19	20	18	22	20	22	19	20	18	43.9	43.9	43.9	58.112	524	524	2.98	18	33	85	64	0	187.66	By MS/MS	By MS/MS	By MS/MS	By MS/MS	By MS/MS	By MS/MS	43.9
P07686	P07686	7	7	7	Beta-hexosaminidase subunit beta;Beta-hexosaminidase subunit beta chain B;Beta-hexosaminidase subunit beta chain A	HEXB	>P07686 Beta-hexosaminidase subunit beta OS=Homo sapiens OX=9606 GN=HEXB PE=1 SV=3	1	7	7	7	5	5	3	6	7	5	5	5	3	6	7	5	5	5	3	6	7	5	17.3	17.3	17.3	63.111	556	556	2.97	6	4	9	15	0	24.576	By MS/MS	By MS/MS	By MS/MS	By MS/MS	By MS/MS	By MS/MS	11.3
P07711	P07711	5	5	5	Cathepsin L1;Cathepsin L1 heavy chain;Cathepsin L1 light chain	CTSL	>P07711 Cathepsin L1 OS=Homo sapiens OX=9606 GN=CTSL PE=1 SV=2	1	5	5	5	3	4	3	4	4	4	3	4	3	4	4	4	3	4	3	4	4	4	16.5	16.5	16.5	37.564	333	333	3			23		0	23.053	By MS/MS	By MS/MS	By MS/MS	By MS/MS	By MS/MS	By MS/MS	10.8
P07737	P07737	8	8	5	Profilin-1	PFN1	>P07737 Profilin-1 OS=Homo sapiens OX=9606 GN=PFN1 PE=1 SV=2	1	8	8	5	8	8	8	8	8	8	8	8	8	8	8	8	5	5	5	5	5	5	69.3	69.3	48.6	15.054	140	140	2.84	9	27	32	29	0	70.43	By MS/MS	By MS/MS	By MS/MS	By MS/MS	By MS/MS	By MS/MS	69.3
P07814	P07814	8	8	8	Bifunctional glutamate/proline--tRNA ligase;Glutamate--tRNA ligase;Proline--tRNA ligase	EPRS	>P07814 Bifunctional glutamate/proline--tRNA ligase OS=Homo sapiens OX=9606 GN=EPRS PE=1 SV=5	1	8	8	8	3	3	2	2	4	1	3	3	2	2	4	1	3	3	2	2	4	1	6.5	6.5	6.5	170.59	1512	1512	3.33		4	2	9	0	11.482	By MS/MS	By MS/MS	By matching	By MS/MS	By MS/MS	By matching	1.8
P07858	P07858	13	13	13	Cathepsin B;Cathepsin B light chain;Cathepsin B heavy chain	CTSB	>P07858 Cathepsin B OS=Homo sapiens OX=9606 GN=CTSB PE=1 SV=3	1	13	13	13	11	11	9	10	13	9	11	11	9	10	13	9	11	11	9	10	13	9	44.2	44.2	44.2	37.821	339	339	2.72	7	51	29	32	0	175.64	By MS/MS	By MS/MS	By MS/MS	By MS/MS	By MS/MS	By MS/MS	39.8
P07900;Q14568;Q58FG0;Q58FG1	P07900	29;6;4;1	29;6;4;1	19;2;2;0	Heat shock protein HSP 90-alpha	HSP90AA1	>P07900 Heat shock protein HSP 90-alpha OS=Homo sapiens OX=9606 GN=HSP90AA1 PE=1 SV=5	4	29	29	19	26	26	23	28	28	27	26	26	23	28	28	27	17	18	14	18	18	18	41.4	41.4	26.5	84.659	732	732;343;334;418	2.49	86	34	108	60	0	323.31	By MS/MS	By MS/MS	By MS/MS	By MS/MS	By MS/MS	By MS/MS	38.9
P07910;P0DMR1;B7ZW38;Q86SE5;O60812;B2RXH8	P07910	5;1;1;1;1;1	5;1;1;1;1;1	5;1;1;1;1;1	Heterogeneous nuclear ribonucleoproteins C1/C2	HNRNPC	>P07910 Heterogeneous nuclear ribonucleoproteins C1/C2 OS=Homo sapiens OX=9606 GN=HNRNPC PE=1 SV=4	6	5	5	5	2	2	2	2	4	3	2	2	2	2	4	3	2	2	2	2	4	3	17.3	17.3	17.3	33.67	306	306;293;293;291;293;293	3.62		2	2	12	0	17.097	By MS/MS	By MS/MS	By MS/MS	By MS/MS	By MS/MS	By MS/MS	8.8
P07942	P07942	34	34	34	Laminin subunit beta-1	LAMB1	>P07942 Laminin subunit beta-1 OS=Homo sapiens OX=9606 GN=LAMB1 PE=1 SV=2	1	34	34	34	22	12	24	24	31	32	22	12	24	24	31	32	22	12	24	24	31	32	20.8	20.8	20.8	198.04	1786	1786	2.15	62	45	34	27	0	201.16	By MS/MS	By MS/MS	By MS/MS	By MS/MS	By MS/MS	By MS/MS	14.6
P07954	P07954	7	7	7	Fumarate hydratase, mitochondrial	FH	>P07954 Fumarate hydratase, mitochondrial OS=Homo sapiens OX=9606 GN=FH PE=1 SV=3	1	7	7	7	5	5	4	4	5	4	5	5	4	4	5	4	5	5	4	4	5	4	22.4	22.4	22.4	54.636	510	510	3	3	6	7	12	0	141.19	By MS/MS	By MS/MS	By MS/MS	By MS/MS	By MS/MS	By MS/MS	14.1
P07996	P07996	59	59	14	Thrombospondin-1	THBS1	>P07996 Thrombospondin-1 OS=Homo sapiens OX=9606 GN=THBS1 PE=1 SV=2	1	59	59	14	51	50	54	48	39	46	51	50	54	48	39	46	13	13	14	13	11	12	62.3	62.3	16.9	129.38	1170	1170	2.57	154	248	287	179	0	323.31	By MS/MS	By MS/MS	By MS/MS	By MS/MS	By MS/MS	By MS/MS	51
P08123;Q6P1N0	P08123	61;1	60;0	60;0	Collagen alpha-2(I) chain	COL1A2	>P08123 Collagen alpha-2(I) chain OS=Homo sapiens OX=9606 GN=COL1A2 PE=1 SV=7	2	61	60	60	52	48	28	60	59	59	51	47	27	59	58	58	51	47	27	59	58	58	68.7	68.2	68.2	129.31	1366	1366;951	2.48	172	259	207	180	0	323.31	By MS/MS	By MS/MS	By MS/MS	By MS/MS	By MS/MS	By MS/MS	58.3
P08133	P08133	15	15	15	Annexin A6	ANXA6	>P08133 Annexin A6 OS=Homo sapiens OX=9606 GN=ANXA6 PE=1 SV=3	1	15	15	15	4	6	3	15	12	10	4	6	3	15	12	10	4	6	3	15	12	10	27.3	27.3	27.3	75.872	673	673	2.52	11	16	28	8	0	99.901	By MS/MS	By MS/MS	By matching	By MS/MS	By MS/MS	By MS/MS	7.4
P08195	P08195	4	4	4	4F2 cell-surface antigen heavy chain	SLC3A2	>P08195 4F2 cell-surface antigen heavy chain OS=Homo sapiens OX=9606 GN=SLC3A2 PE=1 SV=3	1	4	4	4	3	1	2	3	2	1	3	1	2	3	2	1	3	1	2	3	2	1	7.8	7.8	7.8	67.993	630	630	2	4	6		2	0	7.325	By MS/MS	By MS/MS	By MS/MS	By MS/MS	By MS/MS	By MS/MS	5.7
P08237	P08237	3	2	2	ATP-dependent 6-phosphofructokinase, muscle type	PFKM	>P08237 ATP-dependent 6-phosphofructokinase, muscle type OS=Homo sapiens OX=9606 GN=PFKM PE=1 SV=2	1	3	2	2	1	1	2	3	3	2	0	0	1	2	2	1	0	0	1	2	2	1	4.7	3.6	3.6	85.182	780	780	1	7				0	3.0979	By matching	By matching	By MS/MS	By MS/MS	By MS/MS	By matching	1.2
P08238;Q58FF7	P08238	23;9	13;4	12;4	Heat shock protein HSP 90-beta	HSP90AB1	>P08238 Heat shock protein HSP 90-beta OS=Homo sapiens OX=9606 GN=HSP90AB1 PE=1 SV=4	2	23	13	12	22	21	20	23	21	22	13	13	11	13	11	13	12	12	10	12	10	12	35.9	20.9	19.2	83.263	724	724;597	2.78	33	7	69	40	0	246.65	By MS/MS	By MS/MS	By MS/MS	By MS/MS	By MS/MS	By MS/MS	35.9
P08253	P08253	23	23	23	72 kDa type IV collagenase;PEX	MMP2	>P08253 72 kDa type IV collagenase OS=Homo sapiens OX=9606 GN=MMP2 PE=1 SV=2	1	23	23	23	20	13	0	19	20	23	20	13	0	19	20	23	20	13	0	19	20	23	48	48	48	73.881	660	660	2.96	39	28	36	98	0	323.31	By MS/MS	By MS/MS	By matching	By MS/MS	By MS/MS	By MS/MS	39.4
P08254	P08254	3	3	3	Stromelysin-1	MMP3	>P08254 Stromelysin-1 OS=Homo sapiens OX=9606 GN=MMP3 PE=1 SV=2	1	3	3	3	1	1	0	0	2	2	1	1	0	0	2	2	1	1	0	0	2	2	5.9	5.9	5.9	53.977	477	477	2.17		5	1		0	8.0108	By MS/MS	By matching	By matching	By matching	By MS/MS	By MS/MS	2.1
P08294	P08294	2	2	2	Extracellular superoxide dismutase [Cu-Zn]	SOD3	>P08294 Extracellular superoxide dismutase [Cu-Zn] OS=Homo sapiens OX=9606 GN=SOD3 PE=1 SV=2	1	2	2	2	1	1	1	1	1	1	1	1	1	1	1	1	1	1	1	1	1	1	8.8	8.8	8.8	25.851	240	240	1.14	6	1			0.0022792	1.999	By matching	By MS/MS	By matching	By MS/MS	By matching	By MS/MS	3.3
P08473	P08473	3	3	3	Neprilysin	MME	>P08473 Neprilysin OS=Homo sapiens OX=9606 GN=MME PE=1 SV=2	1	3	3	3	0	0	0	2	2	0	0	0	0	2	2	0	0	0	0	2	2	0	4.9	4.9	4.9	85.513	750	750	3.25			3	1	0	4.373	By matching	By matching	By matching	By MS/MS	By MS/MS	By matching	0
P08476	P08476	10	10	10	Inhibin beta A chain	INHBA	>P08476 Inhibin beta A chain OS=Homo sapiens OX=9606 GN=INHBA PE=1 SV=2	1	10	10	10	4	2	2	10	10	7	4	2	2	10	10	7	4	2	2	10	10	7	27.9	27.9	27.9	47.442	426	426	2.16	20	3	13	7	0	105.8	By MS/MS	By MS/MS	By matching	By MS/MS	By MS/MS	By MS/MS	10.8
P08559	P08559	3	3	3	Pyruvate dehydrogenase E1 component subunit alpha, somatic form, mitochondrial	PDHA1	>P08559 Pyruvate dehydrogenase E1 component subunit alpha, somatic form, mitochondrial OS=Homo sapiens OX=9606 GN=PDHA1 PE=1 SV=3	1	3	3	3	1	3	2	3	2	1	1	3	2	3	2	1	1	3	2	3	2	1	7.9	7.9	7.9	43.295	390	390	3			12		0	5.9512	By matching	By MS/MS	By MS/MS	By MS/MS	By matching	By MS/MS	2.1
P08571	P08571	2	2	2	Monocyte differentiation antigen CD14;Monocyte differentiation antigen CD14, urinary form;Monocyte differentiation antigen CD14, membrane-bound form	CD14	>P08571 Monocyte differentiation antigen CD14 OS=Homo sapiens OX=9606 GN=CD14 PE=1 SV=2	1	2	2	2	0	0	0	0	2	0	0	0	0	0	2	0	0	0	0	0	2	0	6.9	6.9	6.9	40.076	375	375	3.5			1	1	0	7.2623	By matching	By matching	By matching	By matching	By MS/MS	By matching	0
P08572	P08572	29	29	29	Collagen alpha-2(IV) chain;Canstatin	COL4A2	>P08572 Collagen alpha-2(IV) chain OS=Homo sapiens OX=9606 GN=COL4A2 PE=1 SV=4	1	29	29	29	4	3	2	24	25	22	4	3	2	24	25	22	4	3	2	24	25	22	24.6	24.6	24.6	167.55	1712	1712	2.92	9	25	58	33	0	323.31	By MS/MS	By MS/MS	By matching	By MS/MS	By MS/MS	By MS/MS	3.4
P08581	P08581	2	2	2	Hepatocyte growth factor receptor	MET	>P08581 Hepatocyte growth factor receptor OS=Homo sapiens OX=9606 GN=MET PE=1 SV=4	1	2	2	2	1	0	2	0	0	0	1	0	2	0	0	0	1	0	2	0	0	0	1.3	1.3	1.3	155.54	1390	1390	3.67			1	2	0.00123	2.4174	By matching	By matching	By MS/MS	By matching	By matching	By matching	0.6
P08603;Q03591	P08603	8;1	8;1	8;1	Complement factor H	CFH	>P08603 Complement factor H OS=Homo sapiens OX=9606 GN=CFH PE=1 SV=4	2	8	8	8	0	0	0	3	2	8	0	0	0	3	2	8	0	0	0	3	2	8	8	8	8	139.09	1231	1231;330	2.23	5	3	2	3	0	20.139	By matching	By matching	By matching	By MS/MS	By matching	By MS/MS	0
P08621	P08621	3	3	3	U1 small nuclear ribonucleoprotein 70 kDa	SNRNP70	>P08621 U1 small nuclear ribonucleoprotein 70 kDa OS=Homo sapiens OX=9606 GN=SNRNP70 PE=1 SV=2	1	3	3	3	1	1	2	0	3	0	1	1	2	0	3	0	1	1	2	0	3	0	6.6	6.6	6.6	51.556	437	437	1.38	5	3			0	3.2251	By MS/MS	By matching	By matching	By matching	By MS/MS	By matching	2.1
P08670;P41219;P07196	P08670	29;3;1	29;3;1	23;2;0	Vimentin	VIM	>P08670 Vimentin OS=Homo sapiens OX=9606 GN=VIM PE=1 SV=4	3	29	29	23	28	24	20	26	26	23	28	24	20	26	26	23	23	18	15	21	21	18	60.1	60.1	49.6	53.651	466	466;470;543	1.86	113	92	54	10	0	323.31	By MS/MS	By MS/MS	By MS/MS	By MS/MS	By MS/MS	By MS/MS	58.4
P08758	P08758	14	14	14	Annexin A5	ANXA5	>P08758 Annexin A5 OS=Homo sapiens OX=9606 GN=ANXA5 PE=1 SV=2	1	14	14	14	10	13	11	14	13	12	10	13	11	14	13	12	10	13	11	14	13	12	46.6	46.6	46.6	35.936	320	320	2.71	12	36	12	33	0	105.18	By MS/MS	By MS/MS	By MS/MS	By MS/MS	By MS/MS	By MS/MS	35
P08865	P08865	7	7	7	40S ribosomal protein SA	RPSA	>P08865 40S ribosomal protein SA OS=Homo sapiens OX=9606 GN=RPSA PE=1 SV=4	1	7	7	7	6	5	3	6	7	4	6	5	3	6	7	4	6	5	3	6	7	4	28.1	28.1	28.1	32.854	295	295	3.06			30	2	0	47.266	By MS/MS	By MS/MS	By MS/MS	By MS/MS	By MS/MS	By MS/MS	23.4
P08962	P08962	2	2	2	CD63 antigen	CD63	>P08962 CD63 antigen OS=Homo sapiens OX=9606 GN=CD63 PE=1 SV=2	1	2	2	2	0	0	0	0	2	0	0	0	0	0	2	0	0	0	0	0	2	0	7.6	7.6	7.6	25.636	238	238	2	1		1		0	9.2262	By matching	By matching	By matching	By matching	By MS/MS	By matching	0
P09012	P09012	3	3	3	U1 small nuclear ribonucleoprotein A	SNRPA	>P09012 U1 small nuclear ribonucleoprotein A OS=Homo sapiens OX=9606 GN=SNRPA PE=1 SV=3	1	3	3	3	2	2	1	1	1	0	2	2	1	1	1	0	2	2	1	1	1	0	13.8	13.8	13.8	31.279	282	282	2.62		5	1	2	0	8.7322	By MS/MS	By MS/MS	By matching	By matching	By matching	By matching	7.4
P09104	P09104	10	7	6	Gamma-enolase	ENO2	>P09104 Gamma-enolase OS=Homo sapiens OX=9606 GN=ENO2 PE=1 SV=3	1	10	7	6	7	8	6	8	9	7	4	6	4	6	7	5	4	5	4	5	6	4	36.4	23.7	21.9	47.268	434	434	3.57			18	24	0	96.686	By MS/MS	By MS/MS	By MS/MS	By MS/MS	By MS/MS	By MS/MS	25.1
P09110	P09110	2	2	2	3-ketoacyl-CoA thiolase, peroxisomal	ACAA1	>P09110 3-ketoacyl-CoA thiolase, peroxisomal OS=Homo sapiens OX=9606 GN=ACAA1 PE=1 SV=2	1	2	2	2	1	1	0	1	2	1	1	1	0	1	2	1	1	1	0	1	2	1	5.4	5.4	5.4	44.292	424	424	4				6	0.0097636	1.458	By matching	By matching	By matching	By matching	By MS/MS	By matching	2.4
P09211	P09211	10	10	10	Glutathione S-transferase P	GSTP1	>P09211 Glutathione S-transferase P OS=Homo sapiens OX=9606 GN=GSTP1 PE=1 SV=2	1	10	10	10	7	6	6	10	8	9	7	6	6	10	8	9	7	6	6	10	8	9	60.5	60.5	60.5	23.356	210	210	2.9	6	23	14	28	0	182.97	By MS/MS	By MS/MS	By MS/MS	By MS/MS	By MS/MS	By MS/MS	55.2
P09341	P09341	4	3	3	Growth-regulated alpha protein;GRO-alpha(4-73);GRO-alpha(5-73);GRO-alpha(6-73)	CXCL1	>P09341 Growth-regulated alpha protein OS=Homo sapiens OX=9606 GN=CXCL1 PE=1 SV=1	1	4	3	3	0	0	0	4	4	4	0	0	0	3	3	3	0	0	0	3	3	3	44.9	29.9	29.9	11.301	107	107	3.06		3	11	4	0	13.125	By matching	By matching	By matching	By MS/MS	By MS/MS	By MS/MS	0
P09382	P09382	8	8	8	Galectin-1	LGALS1	>P09382 Galectin-1 OS=Homo sapiens OX=9606 GN=LGALS1 PE=1 SV=2	1	8	8	8	7	8	6	8	8	8	7	8	6	8	8	8	7	8	6	8	8	8	64.4	64.4	64.4	14.716	135	135	2.95	12	18	37	37	0	282.85	By MS/MS	By MS/MS	By MS/MS	By MS/MS	By MS/MS	By MS/MS	57
P09417	P09417	5	5	5	Dihydropteridine reductase	QDPR	>P09417 Dihydropteridine reductase OS=Homo sapiens OX=9606 GN=QDPR PE=1 SV=2	1	5	5	5	3	5	3	3	4	3	3	5	3	3	4	3	3	5	3	3	4	3	26.6	26.6	26.6	25.789	244	244	2.33	1	26	12	1	0	55.583	By MS/MS	By MS/MS	By MS/MS	By MS/MS	By MS/MS	By MS/MS	13.1
P09429;B2RPK0	P09429	4;1	4;1	4;1	High mobility group protein B1	HMGB1	>P09429 High mobility group protein B1 OS=Homo sapiens OX=9606 GN=HMGB1 PE=1 SV=3	2	4	4	4	4	4	4	3	4	2	4	4	4	3	4	2	4	4	4	3	4	2	20.9	20.9	20.9	24.893	215	215;211	2.41		16	11		0	185.42	By MS/MS	By MS/MS	By MS/MS	By MS/MS	By MS/MS	By MS/MS	20.9
P09455	P09455	3	3	3	Retinol-binding protein 1	RBP1	>P09455 Retinol-binding protein 1 OS=Homo sapiens OX=9606 GN=RBP1 PE=1 SV=2	1	3	3	3	1	2	1	1	2	1	1	2	1	1	2	1	1	2	1	1	2	1	30.4	30.4	30.4	15.85	135	135	1.5	6		2		0	11.11	By MS/MS	By MS/MS	By MS/MS	By MS/MS	By MS/MS	By MS/MS	8.9
P09467;O00757	P09467;O00757	2;1	2;1	2;1	Fructose-1,6-bisphosphatase 1;Fructose-1,6-bisphosphatase isozyme 2	FBP1;FBP2	>P09467 Fructose-1,6-bisphosphatase 1 OS=Homo sapiens OX=9606 GN=FBP1 PE=1 SV=5;>O00757 Fructose-1,6-bisphosphatase isozyme 2 OS=Homo sapiens OX=9606 GN=FBP2 PE=1 SV=2	2	2	2	2	2	2	2	2	2	2	2	2	2	2	2	2	2	2	2	2	2	2	6.8	6.8	6.8	36.842	338	338;339	2.67		6	12		0	4.0129	By MS/MS	By MS/MS	By MS/MS	By MS/MS	By MS/MS	By MS/MS	6.8
P09471	P09471	9	9	7	Guanine nucleotide-binding protein G(o) subunit alpha	GNAO1	>P09471 Guanine nucleotide-binding protein G(o) subunit alpha OS=Homo sapiens OX=9606 GN=GNAO1 PE=1 SV=4	1	9	9	7	8	8	8	9	7	8	8	8	8	9	7	8	6	6	6	7	5	6	28.2	28.2	21.8	40.05	354	354	2.69	7	27	2	23	0	57.076	By MS/MS	By MS/MS	By MS/MS	By MS/MS	By MS/MS	By MS/MS	26
P09486	P09486	14	14	14	SPARC	SPARC	>P09486 SPARC OS=Homo sapiens OX=9606 GN=SPARC PE=1 SV=1	1	14	14	14	10	9	11	13	13	12	10	9	11	13	13	12	10	9	11	13	13	12	47.5	47.5	47.5	34.632	303	303	2.77	44	45	89	74	0	323.31	By MS/MS	By MS/MS	By MS/MS	By MS/MS	By MS/MS	By MS/MS	39.6
P09488;Q03013	P09488;Q03013	5;3	5;3	2;0	Glutathione S-transferase Mu 1;Glutathione S-transferase Mu 4	GSTM1;GSTM4	>P09488 Glutathione S-transferase Mu 1 OS=Homo sapiens OX=9606 GN=GSTM1 PE=1 SV=3;>Q03013 Glutathione S-transferase Mu 4 OS=Homo sapiens OX=9606 GN=GSTM4 PE=1 SV=3	2	5	5	2	4	5	2	5	4	5	4	5	2	5	4	5	1	2	1	2	1	2	19.3	19.3	7.8	25.712	218	218;218	2.26	9	2	16		0	13.931	By MS/MS	By MS/MS	By MS/MS	By MS/MS	By MS/MS	By MS/MS	15.1
P09493	P09493	10	5	4	Tropomyosin alpha-1 chain	TPM1	>P09493 Tropomyosin alpha-1 chain OS=Homo sapiens OX=9606 GN=TPM1 PE=1 SV=2	1	10	5	4	10	10	10	10	10	10	5	5	5	5	5	5	4	4	4	4	4	4	34.5	17.6	13	32.708	284	284	1.4	32	17		1	0	186.68	By MS/MS	By MS/MS	By MS/MS	By MS/MS	By MS/MS	By MS/MS	34.5
P09496	P09496	2	2	2	Clathrin light chain A	CLTA	>P09496 Clathrin light chain A OS=Homo sapiens OX=9606 GN=CLTA PE=1 SV=1	1	2	2	2	1	0	1	2	2	0	1	0	1	2	2	0	1	0	1	2	2	0	7.3	7.3	7.3	27.076	248	248	1	6				0	4.4662	By MS/MS	By matching	By matching	By MS/MS	By MS/MS	By matching	3.6
P09497	P09497	3	3	3	Clathrin light chain B	CLTB	>P09497 Clathrin light chain B OS=Homo sapiens OX=9606 GN=CLTB PE=1 SV=1	1	3	3	3	3	2	3	3	3	0	3	2	3	3	3	0	3	2	3	3	3	0	11.8	11.8	11.8	25.19	229	229	1.71	9		5		0	6.2082	By MS/MS	By MS/MS	By MS/MS	By MS/MS	By MS/MS	By matching	11.8
P09525	P09525	9	9	9	Annexin A4	ANXA4	>P09525 Annexin A4 OS=Homo sapiens OX=9606 GN=ANXA4 PE=1 SV=4	1	9	9	9	9	6	6	4	4	2	9	6	6	4	4	2	9	6	6	4	4	2	33.9	33.9	33.9	35.882	319	319	2.16	10	9	11	2	0	45.905	By MS/MS	By MS/MS	By MS/MS	By MS/MS	By MS/MS	By MS/MS	33.9
P09603	P09603	5	5	5	Macrophage colony-stimulating factor 1;Processed macrophage colony-stimulating factor 1	CSF1	>P09603 Macrophage colony-stimulating factor 1 OS=Homo sapiens OX=9606 GN=CSF1 PE=1 SV=2	1	5	5	5	0	0	0	3	5	3	0	0	0	3	5	3	0	0	0	3	5	3	10.8	10.8	10.8	60.179	554	554	3.09	2	2		7	0	23.112	By matching	By matching	By matching	By MS/MS	By MS/MS	By MS/MS	0
P09622	P09622	8	8	8	Dihydrolipoyl dehydrogenase, mitochondrial	DLD	>P09622 Dihydrolipoyl dehydrogenase, mitochondrial OS=Homo sapiens OX=9606 GN=DLD PE=1 SV=2	1	8	8	8	5	7	5	5	7	5	5	7	5	5	7	5	5	7	5	5	7	5	16.9	16.9	16.9	54.177	509	509	1.48	29	6	7		0	14.604	By MS/MS	By MS/MS	By MS/MS	By MS/MS	By MS/MS	By MS/MS	10
P09651;Q32P51	P09651;Q32P51	8;6	8;6	8;6	Heterogeneous nuclear ribonucleoprotein A1;Heterogeneous nuclear ribonucleoprotein A1, N-terminally processed;Heterogeneous nuclear ribonucleoprotein A1-like 2	HNRNPA1;HNRNPA1L2	>P09651 Heterogeneous nuclear ribonucleoprotein A1 OS=Homo sapiens OX=9606 GN=HNRNPA1 PE=1 SV=5;>Q32P51 Heterogeneous nuclear ribonucleoprotein A1-like 2 OS=Homo sapiens OX=9606 GN=HNRNPA1L2 PE=2 SV=2	2	8	8	8	8	8	7	8	8	8	8	8	7	8	8	8	8	8	7	8	8	8	29.6	29.6	29.6	38.746	372	372;320	2.69	12	23	15	24	0	134.94	By MS/MS	By MS/MS	By MS/MS	By MS/MS	By MS/MS	By MS/MS	29.6
P09871	P09871	19	19	19	Complement C1s subcomponent;Complement C1s subcomponent heavy chain;Complement C1s subcomponent light chain	C1S	>P09871 Complement C1s subcomponent OS=Homo sapiens OX=9606 GN=C1S PE=1 SV=1	1	19	19	19	1	0	0	13	19	17	1	0	0	13	19	17	1	0	0	13	19	17	35.5	35.5	35.5	76.684	688	688	2.47	18	20	27	14	0	202.78	By matching	By matching	By matching	By MS/MS	By MS/MS	By MS/MS	1.6
P09936	P09936	8	8	8	Ubiquitin carboxyl-terminal hydrolase isozyme L1	UCHL1	>P09936 Ubiquitin carboxyl-terminal hydrolase isozyme L1 OS=Homo sapiens OX=9606 GN=UCHL1 PE=1 SV=2	1	8	8	8	6	7	6	8	7	8	6	7	6	8	7	8	6	7	6	8	7	8	43.9	43.9	43.9	24.824	223	223	3.02	11	29	40	54	0	323.31	By MS/MS	By MS/MS	By MS/MS	By MS/MS	By MS/MS	By MS/MS	31.8
P09960	P09960	7	7	7	Leukotriene A-4 hydrolase	LTA4H	>P09960 Leukotriene A-4 hydrolase OS=Homo sapiens OX=9606 GN=LTA4H PE=1 SV=2	1	7	7	7	6	6	6	6	6	6	6	6	6	6	6	6	6	6	6	6	6	6	13.9	13.9	13.9	69.284	611	611	2.7	6	12	6	13	0	19.533	By MS/MS	By MS/MS	By MS/MS	By MS/MS	By MS/MS	By MS/MS	11.5
P09972	P09972	16	12	12	Fructose-bisphosphate aldolase C	ALDOC	>P09972 Fructose-bisphosphate aldolase C OS=Homo sapiens OX=9606 GN=ALDOC PE=1 SV=2	1	16	12	12	12	12	11	15	13	14	10	10	8	12	9	11	10	10	8	12	9	11	48.6	37.1	37.1	39.455	364	364	1.95	37	53	13	9	0	217.83	By MS/MS	By MS/MS	By MS/MS	By MS/MS	By MS/MS	By MS/MS	39.8
P0C0L5;P0C0L4	P0C0L5;P0C0L4	10;10	2;2	2;2	Complement C4-B;Complement C4 beta chain;Complement C4-B alpha chain;C4a anaphylatoxin;C4b-B;C4d-B;Complement C4 gamma chain;Complement C4-A;Complement C4 beta chain;Complement C4-A alpha chain;C4a anaphylatoxin;C4b-A;C4d-A;Complement C4 gamma chain	C4B;C4A	>P0C0L5 Complement C4-B OS=Homo sapiens OX=9606 GN=C4B PE=1 SV=2;>P0C0L4 Complement C4-A OS=Homo sapiens OX=9606 GN=C4A PE=1 SV=2	2	10	2	2	9	7	9	8	9	9	1	1	1	1	1	1	1	1	1	1	1	1	5.8	2.1	2.1	192.75	1744	1744;1744	3.56		2		7	0	29.031	By MS/MS	By MS/MS	By matching	By matching	By MS/MS	By matching	5
Q71UI9;P0C0S5;Q99878;Q96KK5;Q9BTM1;Q16777;Q93077;Q7L7L0;Q6FI13;P20671;P0C0S8;P04908;Q96QV6;P16104;Q8IUE6	Q71UI9;P0C0S5;Q99878;Q96KK5;Q9BTM1;Q16777;Q93077;Q7L7L0;Q6FI13;P20671;P0C0S8;P04908;Q96QV6;P16104	3;3;2;2;2;2;2;2;2;2;2;2;2;2;1	3;3;2;2;2;2;2;2;2;2;2;2;2;2;1	3;3;2;2;2;2;2;2;2;2;2;2;2;2;1	Histone H2A.V;Histone H2A.Z;Histone H2A type 1-J;Histone H2A type 1-H;Histone H2A.J;Histone H2A type 2-C;Histone H2A type 1-C;Histone H2A type 3;Histone H2A type 2-A;Histone H2A type 1-D;Histone H2A type 1;Histone H2A type 1-B/E;Histone H2A type 1-A;Histone H2AX	H2AFV;H2AFZ;HIST1H2AJ;HIST1H2AH;H2AFJ;HIST2H2AC;HIST1H2AC;HIST3H2A;HIST2H2AA3;HIST1H2AD;HIST1H2AG;HIST1H2AB;HIST1H2AA;H2AFX	>Q71UI9 Histone H2A.V OS=Homo sapiens OX=9606 GN=H2AFV PE=1 SV=3;>P0C0S5 Histone H2A.Z OS=Homo sapiens OX=9606 GN=H2AFZ PE=1 SV=2;>Q99878 Histone H2A type 1-J OS=Homo sapiens OX=9606 GN=HIST1H2AJ PE=1 SV=3;>Q96KK5 Histone H2A type 1-H OS=Homo sapiens OX=96	15	3	3	3	2	3	2	2	3	3	2	3	2	2	3	3	2	3	2	2	3	3	20.3	20.3	20.3	13.509	128	128;128;128;128;129;129;130;130;130;130;130;130;131;143;130	2.68	6		7	6	0	5.7398	By MS/MS	By MS/MS	By matching	By MS/MS	By MS/MS	By MS/MS	13.3
P62987;P62979;P0CG47;P0CG48	P62987;P62979;P0CG47;P0CG48	9;9;9;9	9;9;9;9	9;9;9;9	Ubiquitin-60S ribosomal protein L40;Ubiquitin;60S ribosomal protein L40;Ubiquitin-40S ribosomal protein S27a;Ubiquitin;40S ribosomal protein S27a;Polyubiquitin-B;Ubiquitin;Polyubiquitin-C;Ubiquitin	UBA52;RPS27A;UBB;UBC	>P62987 Ubiquitin-60S ribosomal protein L40 OS=Homo sapiens OX=9606 GN=UBA52 PE=1 SV=2;>P62979 Ubiquitin-40S ribosomal protein S27a OS=Homo sapiens OX=9606 GN=RPS27A PE=1 SV=2;>P0CG47 Polyubiquitin-B OS=Homo sapiens OX=9606 GN=UBB PE=1 SV=1;>P0CG48 Polyubi	4	9	9	9	9	9	8	9	8	8	9	9	8	9	8	8	9	9	8	9	8	8	47.7	47.7	47.7	14.728	128	128;156;229;685	2.38	51	56	30	45	0	176.2	By MS/MS	By MS/MS	By MS/MS	By MS/MS	By MS/MS	By MS/MS	47.7
P0DJI9;P0DJI8	P0DJI9;P0DJI8	3;2	3;2	3;2	Serum amyloid A-2 protein;Serum amyloid A-1 protein;Amyloid protein A;Serum amyloid protein A(2-104);Serum amyloid protein A(3-104);Serum amyloid protein A(2-103);Serum amyloid protein A(2-102);Serum amyloid protein A(4-101)	SAA2;SAA1	>P0DJI9 Serum amyloid A-2 protein OS=Homo sapiens OX=9606 GN=SAA2 PE=1 SV=1;>P0DJI8 Serum amyloid A-1 protein OS=Homo sapiens OX=9606 GN=SAA1 PE=1 SV=1	2	3	3	3	0	0	0	2	3	0	0	0	0	2	3	0	0	0	0	2	3	0	25.4	25.4	25.4	13.527	122	122;122	1.4	4		1		0	4.3495	By matching	By matching	By matching	By MS/MS	By MS/MS	By matching	0
P0DMV9;P0DMV8	P0DMV9;P0DMV8	18;18	16;16	8;8			>P0DMV9 Heat shock 70 kDa protein 1B OS=Homo sapiens OX=9606 GN=HSPA1B PE=1 SV=1;>P0DMV8 Heat shock 70 kDa protein 1A OS=Homo sapiens OX=9606 GN=HSPA1A PE=1 SV=1	2	18	16	8	18	17	17	17	16	16	16	15	15	15	14	14	8	7	8	7	7	7	32.9	29.8	12.8	70.051	641	641;641	3.07	33	6	50	85	0	323.31	By MS/MS	By MS/MS	By MS/MS	By MS/MS	By MS/MS	By MS/MS	32.9
P0DP25;P0DP24;P0DP23;P27482;P02585	P0DP25;P0DP24;P0DP23	8;8;8;2;1	8;8;8;2;1	8;8;8;2;1			>P0DP25 Calmodulin-3 OS=Homo sapiens OX=9606 GN=CALM3 PE=1 SV=1;>P0DP24 Calmodulin-2 OS=Homo sapiens OX=9606 GN=CALM2 PE=1 SV=1;>P0DP23 Calmodulin-1 OS=Homo sapiens OX=9606 GN=CALM1 PE=1 SV=1	5	8	8	8	8	8	6	8	8	7	8	8	6	8	8	7	8	8	6	8	8	7	57.7	57.7	57.7	16.837	149	149;149;149;149;160	2.41	12	25	44	1	0	231.57	By MS/MS	By MS/MS	By MS/MS	By MS/MS	By MS/MS	By MS/MS	57.7
P10155	P10155	2	2	2	60 kDa SS-A/Ro ribonucleoprotein	TROVE2	>P10155 60 kDa SS-A/Ro ribonucleoprotein OS=Homo sapiens OX=9606 GN=TROVE2 PE=1 SV=2	1	2	2	2	1	1	0	1	2	1	1	1	0	1	2	1	1	1	0	1	2	1	4.1	4.1	4.1	60.67	538	538	1.67	2	4			0	3.4067	By MS/MS	By matching	By matching	By matching	By MS/MS	By MS/MS	2.4
P10253	P10253	4	4	4	Lysosomal alpha-glucosidase;76 kDa lysosomal alpha-glucosidase;70 kDa lysosomal alpha-glucosidase	GAA	>P10253 Lysosomal alpha-glucosidase OS=Homo sapiens OX=9606 GN=GAA PE=1 SV=4	1	4	4	4	3	1	2	2	2	3	3	1	2	2	2	3	3	1	2	2	2	3	5	5	5	105.32	952	952	1.23	11	1	1		0	4.7352	By MS/MS	By matching	By MS/MS	By matching	By MS/MS	By MS/MS	3.2
P10515	P10515	6	6	6	Dihydrolipoyllysine-residue acetyltransferase component of pyruvate dehydrogenase complex, mitochondrial	DLAT	>P10515 Dihydrolipoyllysine-residue acetyltransferase component of pyruvate dehydrogenase complex, mitochondrial OS=Homo sapiens OX=9606 GN=DLAT PE=1 SV=3	1	6	6	6	4	4	3	5	4	3	4	4	3	5	4	3	4	4	3	5	4	3	9.9	9.9	9.9	68.996	647	647	3.62		2	6	18	0	14.208	By MS/MS	By MS/MS	By MS/MS	By MS/MS	By MS/MS	By MS/MS	7.4
P10586	P10586	2	2	2	Receptor-type tyrosine-protein phosphatase F	PTPRF	>P10586 Receptor-type tyrosine-protein phosphatase F OS=Homo sapiens OX=9606 GN=PTPRF PE=1 SV=2	1	2	2	2	0	0	0	1	1	0	0	0	0	1	1	0	0	0	0	1	1	0	1.3	1.3	1.3	212.88	1907	1907	3.5			1	1	0	3.0886	By matching	By matching	By matching	By MS/MS	By MS/MS	By matching	0
P10599	P10599	6	6	6	Thioredoxin	TXN	>P10599 Thioredoxin OS=Homo sapiens OX=9606 GN=TXN PE=1 SV=3	1	6	6	6	6	6	6	6	6	6	6	6	6	6	6	6	6	6	6	6	6	6	48.6	48.6	48.6	11.737	105	105	2.07	23	22	3	12	0	186.4	By MS/MS	By MS/MS	By MS/MS	By MS/MS	By MS/MS	By MS/MS	48.6
P10619	P10619	3	3	3	Lysosomal protective protein;Lysosomal protective protein 32 kDa chain;Lysosomal protective protein 20 kDa chain	CTSA	>P10619 Lysosomal protective protein OS=Homo sapiens OX=9606 GN=CTSA PE=1 SV=2	1	3	3	3	2	2	2	1	3	1	2	2	2	1	3	1	2	2	2	1	3	1	7.7	7.7	7.7	54.465	480	480	3.23		4	2	7	0	19.38	By MS/MS	By MS/MS	By MS/MS	By MS/MS	By MS/MS	By MS/MS	5
P10636	P10636	3	3	3	Microtubule-associated protein tau	MAPT	>P10636 Microtubule-associated protein tau OS=Homo sapiens OX=9606 GN=MAPT PE=1 SV=5	1	3	3	3	3	3	2	3	2	1	3	3	2	3	2	1	3	3	2	3	2	1	5.1	5.1	5.1	78.927	758	758	2.22	5	4	9		0	5.83	By MS/MS	By MS/MS	By MS/MS	By MS/MS	By MS/MS	By MS/MS	5.1
P10644;P31321	P10644	9;1	9;1	9;1	cAMP-dependent protein kinase type I-alpha regulatory subunit;cAMP-dependent protein kinase type I-alpha regulatory subunit, N-terminally processed	PRKAR1A	>P10644 cAMP-dependent protein kinase type I-alpha regulatory subunit OS=Homo sapiens OX=9606 GN=PRKAR1A PE=1 SV=1	2	9	9	9	7	8	6	8	7	2	7	8	6	8	7	2	7	8	6	8	7	2	24.9	24.9	24.9	42.981	381	381;381	2.71	7	9	19	10	0	29.836	By MS/MS	By MS/MS	By MS/MS	By MS/MS	By MS/MS	By MS/MS	18.1
P10645	P10645	3	3	3	Chromogranin-A;Vasostatin-1;Vasostatin-2;EA-92;ES-43;Pancreastatin;SS-18;WA-8;WE-14;LF-19;AL-11;GV-19;GR-44;ER-37	CHGA	>P10645 Chromogranin-A OS=Homo sapiens OX=9606 GN=CHGA PE=1 SV=7	1	3	3	3	3	3	3	3	3	3	3	3	3	3	3	3	3	3	3	3	3	3	9.2	9.2	9.2	50.688	457	457	2.93	2	19	1	20	0	55.099	By MS/MS	By MS/MS	By MS/MS	By MS/MS	By MS/MS	By MS/MS	9.2
P10646	P10646	6	6	6	Tissue factor pathway inhibitor	TFPI	>P10646 Tissue factor pathway inhibitor OS=Homo sapiens OX=9606 GN=TFPI PE=1 SV=1	1	6	6	6	5	1	1	3	6	5	5	1	1	3	6	5	5	1	1	3	6	5	25.3	25.3	25.3	35.015	304	304	2.29	10		6	5	0	59.944	By MS/MS	By matching	By matching	By MS/MS	By MS/MS	By MS/MS	18.4
P10768	P10768	3	3	3	S-formylglutathione hydrolase	ESD	>P10768 S-formylglutathione hydrolase OS=Homo sapiens OX=9606 GN=ESD PE=1 SV=2	1	3	3	3	1	1	1	2	3	1	1	1	1	2	3	1	1	1	1	2	3	1	10.6	10.6	10.6	31.462	282	282	3.11			8	1	0	3.8117	By matching	By MS/MS	By MS/MS	By MS/MS	By MS/MS	By MS/MS	2.5
P10809	P10809	21	21	21	60 kDa heat shock protein, mitochondrial	HSPD1	>P10809 60 kDa heat shock protein, mitochondrial OS=Homo sapiens OX=9606 GN=HSPD1 PE=1 SV=2	1	21	21	21	18	14	13	14	17	13	18	14	13	14	17	13	18	14	13	14	17	13	49.7	49.7	49.7	61.054	573	573	2.25	26	32	47	3	0	294.1	By MS/MS	By MS/MS	By MS/MS	By MS/MS	By MS/MS	By MS/MS	39.8
P10909	P10909	10	10	10	Clusterin;Clusterin beta chain;Clusterin alpha chain	CLU	>P10909 Clusterin OS=Homo sapiens OX=9606 GN=CLU PE=1 SV=1	1	10	10	10	10	10	10	8	10	9	10	10	10	8	10	9	10	10	10	8	10	9	27.6	27.6	27.6	52.494	449	449	2.22	25	24	16	13	0	323.31	By MS/MS	By MS/MS	By MS/MS	By MS/MS	By MS/MS	By MS/MS	27.6
P11021	P11021	27	27	26	78 kDa glucose-regulated protein	HSPA5	>P11021 Endoplasmic reticulum chaperone BiP OS=Homo sapiens OX=9606 GN=HSPA5 PE=1 SV=2	1	27	27	26	23	23	21	27	25	26	23	23	21	27	25	26	22	22	20	26	24	25	47.7	47.7	45.3	72.332	654	654	2.71	67	78	78	115	0	323.31	By MS/MS	By MS/MS	By MS/MS	By MS/MS	By MS/MS	By MS/MS	43.1
P11047;Q9Y6N6	P11047	39;1	39;1	39;1	Laminin subunit gamma-1	LAMC1	>P11047 Laminin subunit gamma-1 OS=Homo sapiens OX=9606 GN=LAMC1 PE=1 SV=3	2	39	39	39	26	16	23	22	33	36	26	16	23	22	33	36	26	16	23	22	33	36	32.4	32.4	32.4	177.6	1609	1609;1575	2.31	53	53	53	29	0	323.31	By MS/MS	By MS/MS	By MS/MS	By MS/MS	By MS/MS	By MS/MS	20.6
P11142	P11142	25	24	17	Heat shock cognate 71 kDa protein	HSPA8	>P11142 Heat shock cognate 71 kDa protein OS=Homo sapiens OX=9606 GN=HSPA8 PE=1 SV=1	1	25	24	17	23	24	22	23	23	23	22	23	21	22	22	22	16	16	15	15	15	15	47.8	45.4	34.7	70.897	646	646	2.68	83	39	76	108	0	323.31	By MS/MS	By MS/MS	By MS/MS	By MS/MS	By MS/MS	By MS/MS	43
P11216;P11217	P11216	9;4	5;0	5;0	Glycogen phosphorylase, brain form	PYGB	>P11216 Glycogen phosphorylase, brain form OS=Homo sapiens OX=9606 GN=PYGB PE=1 SV=5	2	9	5	5	7	7	3	4	6	3	4	3	1	2	4	1	4	3	1	2	4	1	11.7	7.5	7.5	96.695	843	843;842	2.24	7		9	1	0	13.8	By MS/MS	By MS/MS	By MS/MS	By MS/MS	By MS/MS	By MS/MS	9.1
P11413	P11413	14	14	14	Glucose-6-phosphate 1-dehydrogenase	G6PD	>P11413 Glucose-6-phosphate 1-dehydrogenase OS=Homo sapiens OX=9606 GN=G6PD PE=1 SV=4	1	14	14	14	6	9	4	9	14	13	6	9	4	9	14	13	6	9	4	9	14	13	30.5	30.5	30.5	59.256	515	515	2.67	15	10	19	19	0	85.525	By MS/MS	By MS/MS	By MS/MS	By MS/MS	By MS/MS	By MS/MS	10.9
P11586	P11586	2	2	2	C-1-tetrahydrofolate synthase, cytoplasmic;Methylenetetrahydrofolate dehydrogenase;Methenyltetrahydrofolate cyclohydrolase;Formyltetrahydrofolate synthetase;C-1-tetrahydrofolate synthase, cytoplasmic, N-terminally processed	MTHFD1	>P11586 C-1-tetrahydrofolate synthase, cytoplasmic OS=Homo sapiens OX=9606 GN=MTHFD1 PE=1 SV=3	1	2	2	2	1	0	0	0	1	0	1	0	0	0	1	0	1	0	0	0	1	0	3.4	3.4	3.4	101.56	935	935	2.5	1			1	0	4.2383	By MS/MS	By matching	By matching	By matching	By MS/MS	By matching	2.6
P11717	P11717	2	2	2	Cation-independent mannose-6-phosphate receptor	IGF2R	>P11717 Cation-independent mannose-6-phosphate receptor OS=Homo sapiens OX=9606 GN=IGF2R PE=1 SV=3	1	2	2	2	0	1	1	1	2	1	0	1	1	1	2	1	0	1	1	1	2	1	0.9	0.9	0.9	274.37	2491	2491	3.67		1		5	0.00063211	2.719	By matching	By matching	By MS/MS	By matching	By MS/MS	By MS/MS	0
P11766	P11766	6	6	6	Alcohol dehydrogenase class-3	ADH5	>P11766 Alcohol dehydrogenase class-3 OS=Homo sapiens OX=9606 GN=ADH5 PE=1 SV=4	1	6	6	6	4	5	3	5	5	5	4	5	3	5	5	5	4	5	3	5	5	5	17.4	17.4	17.4	39.724	374	374	2.31	4	14	14		0	11.542	By MS/MS	By MS/MS	By MS/MS	By MS/MS	By MS/MS	By MS/MS	10.7
P11940;Q13310;Q9H361;Q4VXU2;Q5JQF8	P11940	11;5;4;2;1	11;5;4;2;1	11;5;4;2;1	Polyadenylate-binding protein 1	PABPC1	>P11940 Polyadenylate-binding protein 1 OS=Homo sapiens OX=9606 GN=PABPC1 PE=1 SV=2	5	11	11	11	10	7	4	7	8	8	10	7	4	7	8	8	10	7	4	7	8	8	19.8	19.8	19.8	70.67	636	636;644;631;614;200	3.29	2	1	26	19	0	58.799	By MS/MS	By MS/MS	By MS/MS	By MS/MS	By MS/MS	By MS/MS	18.6
P12004	P12004	3	3	3	Proliferating cell nuclear antigen	PCNA	>P12004 Proliferating cell nuclear antigen OS=Homo sapiens OX=9606 GN=PCNA PE=1 SV=1	1	3	3	3	3	2	2	3	2	2	3	2	2	3	2	2	3	2	2	3	2	2	13.4	13.4	13.4	28.768	261	261	1.86	5	6	3		0	11.461	By MS/MS	By MS/MS	By matching	By MS/MS	By MS/MS	By MS/MS	13.4
P12081;P49590	P12081	10;4	10;4	10;4	Histidine--tRNA ligase, cytoplasmic	HARS	>P12081 Histidine--tRNA ligase, cytoplasmic OS=Homo sapiens OX=9606 GN=HARS PE=1 SV=2	2	10	10	10	4	10	8	8	8	7	4	10	8	8	8	7	4	10	8	8	8	7	22.8	22.8	22.8	57.41	509	509;506	2.54	14	10	8	16	0	82.885	By MS/MS	By MS/MS	By MS/MS	By MS/MS	By MS/MS	By MS/MS	10.4
P12107	P12107	28	24	24	Collagen alpha-1(XI) chain	COL11A1	>P12107 Collagen alpha-1(XI) chain OS=Homo sapiens OX=9606 GN=COL11A1 PE=1 SV=4	1	28	24	24	0	2	1	28	24	18	0	1	0	24	20	14	0	1	0	24	20	14	19.9	17.3	17.3	181.06	1806	1806	2.64	12	10	45	7	0	188.39	By matching	By matching	By matching	By MS/MS	By MS/MS	By MS/MS	0
P12109	P12109	34	34	34	Collagen alpha-1(VI) chain	COL6A1	>P12109 Collagen alpha-1(VI) chain OS=Homo sapiens OX=9606 GN=COL6A1 PE=1 SV=3	1	34	34	34	10	19	11	31	30	34	10	19	11	31	30	34	10	19	11	31	30	34	44.7	44.7	44.7	108.53	1028	1028	2.88	44	49	88	103	0	323.31	By MS/MS	By MS/MS	By MS/MS	By MS/MS	By MS/MS	By MS/MS	12.2
P12110	P12110	27	27	27	Collagen alpha-2(VI) chain	COL6A2	>P12110 Collagen alpha-2(VI) chain OS=Homo sapiens OX=9606 GN=COL6A2 PE=1 SV=4	1	27	27	27	5	13	7	21	21	27	5	13	7	21	21	27	5	13	7	21	21	27	30	30	30	108.58	1019	1019	2.66	25	31	46	35	0	262.5	By MS/MS	By MS/MS	By MS/MS	By MS/MS	By MS/MS	By MS/MS	5
P12111	P12111	92	92	92	Collagen alpha-3(VI) chain	COL6A3	>P12111 Collagen alpha-3(VI) chain OS=Homo sapiens OX=9606 GN=COL6A3 PE=1 SV=5	1	92	92	92	8	57	7	81	82	89	8	57	7	81	82	89	8	57	7	81	82	89	35.6	35.6	35.6	343.67	3177	3177	2.8	74	87	170	142	0	323.31	By matching	By MS/MS	By matching	By MS/MS	By MS/MS	By MS/MS	2.3
P12268	P12268	2	2	2	Inosine-5-monophosphate dehydrogenase 2	IMPDH2	>P12268 Inosine-5-monophosphate dehydrogenase 2 OS=Homo sapiens OX=9606 GN=IMPDH2 PE=1 SV=2	1	2	2	2	2	2	1	1	2	2	2	2	1	1	2	2	2	2	1	1	2	2	4.7	4.7	4.7	55.804	514	514	3.6			4	6	0	13.385	By MS/MS	By MS/MS	By matching	By MS/MS	By MS/MS	By matching	4.7
P12270	P12270	12	12	12	Nucleoprotein TPR	TPR	>P12270 Nucleoprotein TPR OS=Homo sapiens OX=9606 GN=TPR PE=1 SV=3	1	12	12	12	7	11	4	8	8	7	7	11	4	8	8	7	7	11	4	8	8	7	5.9	5.9	5.9	267.29	2363	2363	2.54	6	16	20	6	0	33.817	By MS/MS	By MS/MS	By MS/MS	By MS/MS	By MS/MS	By MS/MS	3.2
P12277	P12277	10	10	8	Creatine kinase B-type	CKB	>P12277 Creatine kinase B-type OS=Homo sapiens OX=9606 GN=CKB PE=1 SV=1	1	10	10	8	10	10	8	10	10	9	10	10	8	10	10	9	8	8	6	8	8	7	39.6	39.6	37.5	42.644	381	381	2.87	6	20	38	21	0	219.91	By MS/MS	By MS/MS	By MS/MS	By MS/MS	By MS/MS	By MS/MS	39.6
P12429	P12429	13	13	13	Annexin A3	ANXA3	>P12429 Annexin A3 OS=Homo sapiens OX=9606 GN=ANXA3 PE=1 SV=3	1	13	13	13	13	10	12	5	3	1	13	10	12	5	3	1	13	10	12	5	3	1	43	43	43	36.375	323	323	2.41	12	15	15	9	0	86.457	By MS/MS	By MS/MS	By MS/MS	By MS/MS	By matching	By matching	43
P12532;P17540	P12532	4;1	4;1	4;1	Creatine kinase U-type, mitochondrial	CKMT1A	>P12532 Creatine kinase U-type, mitochondrial OS=Homo sapiens OX=9606 GN=CKMT1A PE=1 SV=1	2	4	4	4	2	3	2	4	3	2	2	3	2	4	3	2	2	3	2	4	3	2	12.2	12.2	12.2	47.036	417	417;419	2.81	4	1	5	6	0	7.3244	By MS/MS	By MS/MS	By MS/MS	By MS/MS	By MS/MS	By matching	5.5
P12814;P35609;Q08043	P12814	43;13;9	28;4;2	28;4;2	Alpha-actinin-1	ACTN1	>P12814 Alpha-actinin-1 OS=Homo sapiens OX=9606 GN=ACTN1 PE=1 SV=2	3	43	28	28	38	41	34	40	43	38	23	26	19	25	28	24	23	26	19	25	28	24	55.6	37.8	37.8	103.06	892	892;894;901	2.76	31	48	67	61	0	323.31	By MS/MS	By MS/MS	By MS/MS	By MS/MS	By MS/MS	By MS/MS	51.7
P12955	P12955	3	3	3	Xaa-Pro dipeptidase	PEPD	>P12955 Xaa-Pro dipeptidase OS=Homo sapiens OX=9606 GN=PEPD PE=1 SV=3	1	3	3	3	1	2	2	1	2	2	1	2	2	1	2	2	1	2	2	1	2	2	7.9	7.9	7.9	54.548	493	493	2.5	1	6		3	0	20.79	By MS/MS	By MS/MS	By MS/MS	By MS/MS	By MS/MS	By MS/MS	1.8
P12956	P12956	8	8	8	X-ray repair cross-complementing protein 6	XRCC6	>P12956 X-ray repair cross-complementing protein 6 OS=Homo sapiens OX=9606 GN=XRCC6 PE=1 SV=2	1	8	8	8	6	3	2	3	8	3	6	3	2	3	8	3	6	3	2	3	8	3	16.3	16.3	16.3	69.842	609	609	3.04	5	1	7	12	0	17.639	By MS/MS	By MS/MS	By MS/MS	By MS/MS	By MS/MS	By MS/MS	11.8
P13010	P13010	5	5	5	X-ray repair cross-complementing protein 5	XRCC5	>P13010 X-ray repair cross-complementing protein 5 OS=Homo sapiens OX=9606 GN=XRCC5 PE=1 SV=3	1	5	5	5	4	2	3	2	5	4	4	2	3	2	5	4	4	2	3	2	5	4	8.7	8.7	8.7	82.704	732	732	2.5	6	4	4	6	0	17.283	By MS/MS	By matching	By matching	By MS/MS	By MS/MS	By MS/MS	6.6
P13473	P13473	4	4	4	Lysosome-associated membrane glycoprotein 2	LAMP2	>P13473 Lysosome-associated membrane glycoprotein 2 OS=Homo sapiens OX=9606 GN=LAMP2 PE=1 SV=2	1	4	4	4	1	1	1	3	3	2	1	1	1	3	3	2	1	1	1	3	3	2	8.8	8.8	8.8	44.96	410	410	3.09	3		1	7	0	14.879	By matching	By MS/MS	By matching	By MS/MS	By MS/MS	By MS/MS	2
P13489	P13489	7	7	7	Ribonuclease inhibitor	RNH1	>P13489 Ribonuclease inhibitor OS=Homo sapiens OX=9606 GN=RNH1 PE=1 SV=2	1	7	7	7	5	5	4	5	7	4	5	5	4	5	7	4	5	5	4	5	7	4	22.6	22.6	22.6	49.973	461	461	2.13	16	2	6	7	0	88.946	By MS/MS	By MS/MS	By MS/MS	By MS/MS	By MS/MS	By MS/MS	15.8
P13497;Q9Y6L7;O43897	P13497	25;5;2	25;5;2	25;5;2	Bone morphogenetic protein 1	BMP1	>P13497 Bone morphogenetic protein 1 OS=Homo sapiens OX=9606 GN=BMP1 PE=1 SV=2	3	25	25	25	22	10	21	14	15	9	22	10	21	14	15	9	22	10	21	14	15	9	31.2	31.2	31.2	111.25	986	986;1015;1013	2.32	16	55	32	10	0	129.22	By MS/MS	By MS/MS	By MS/MS	By MS/MS	By MS/MS	By MS/MS	26.9
P13521	P13521	13	13	13	Secretogranin-2;Secretoneurin	SCG2	>P13521 Secretogranin-2 OS=Homo sapiens OX=9606 GN=SCG2 PE=1 SV=2	1	13	13	13	11	8	10	10	13	8	11	8	10	10	13	8	11	8	10	10	13	8	25.1	25.1	25.1	70.94	617	617	2.17	29	59	37	7	0	245.1	By MS/MS	By MS/MS	By MS/MS	By MS/MS	By MS/MS	By MS/MS	19.4
P13591	P13591	3	3	3	Neural cell adhesion molecule 1	NCAM1	>P13591 Neural cell adhesion molecule 1 OS=Homo sapiens OX=9606 GN=NCAM1 PE=1 SV=3	1	3	3	3	1	2	2	1	1	2	1	2	2	1	1	2	1	2	2	1	1	2	5.2	5.2	5.2	94.573	858	858	3.6			4	6	0	9.702	By matching	By MS/MS	By MS/MS	By MS/MS	By matching	By MS/MS	1.3
P13611	P13611	19	19	19	Versican core protein	VCAN	>P13611 Versican core protein OS=Homo sapiens OX=9606 GN=VCAN PE=1 SV=3	1	19	19	19	3	7	3	18	19	19	3	7	3	18	19	19	3	7	3	18	19	19	7	7	7	372.82	3396	3396	2.64	12	37	33	23	0	323.31	By matching	By MS/MS	By matching	By MS/MS	By MS/MS	By MS/MS	0.8
P13639;Q15029	P13639	36;1	36;1	36;1	Elongation factor 2	EEF2	>P13639 Elongation factor 2 OS=Homo sapiens OX=9606 GN=EEF2 PE=1 SV=4	2	36	36	36	32	34	25	33	34	31	32	34	25	33	34	31	32	34	25	33	34	31	38	38	38	95.337	858	858;972	2.24	78	67	69	35	0	203.57	By MS/MS	By MS/MS	By MS/MS	By MS/MS	By MS/MS	By MS/MS	33.1
P13667	P13667	16	16	16	Protein disulfide-isomerase A4	PDIA4	>P13667 Protein disulfide-isomerase A4 OS=Homo sapiens OX=9606 GN=PDIA4 PE=1 SV=2	1	16	16	16	8	13	8	15	15	14	8	13	8	15	15	14	8	13	8	15	15	14	30.4	30.4	30.4	72.932	645	645	2.28	24	22	32	8	0	61.725	By MS/MS	By MS/MS	By MS/MS	By MS/MS	By MS/MS	By MS/MS	13
P13674	P13674	7	7	7	Prolyl 4-hydroxylase subunit alpha-1	P4HA1	>P13674 Prolyl 4-hydroxylase subunit alpha-1 OS=Homo sapiens OX=9606 GN=P4HA1 PE=1 SV=2	1	7	7	7	1	3	0	4	7	4	1	3	0	4	7	4	1	3	0	4	7	4	15.9	15.9	15.9	61.049	534	534	2.77		10	7	5	0	23.425	By MS/MS	By MS/MS	By matching	By MS/MS	By MS/MS	By MS/MS	2.1
P13693;Q56UQ5	P13693	3;1	3;1	3;1	Translationally-controlled tumor protein	TPT1	>P13693 Translationally-controlled tumor protein OS=Homo sapiens OX=9606 GN=TPT1 PE=1 SV=1	2	3	3	3	2	2	2	3	3	2	2	2	2	3	3	2	2	2	2	3	3	2	19.8	19.8	19.8	19.595	172	172;140	3.2		2	12	6	0	118.79	By MS/MS	By MS/MS	By MS/MS	By MS/MS	By MS/MS	By MS/MS	12.2
P13716	P13716	3	3	3	Delta-aminolevulinic acid dehydratase	ALAD	>P13716 Delta-aminolevulinic acid dehydratase OS=Homo sapiens OX=9606 GN=ALAD PE=1 SV=1	1	3	3	3	2	3	2	3	3	2	2	3	2	3	3	2	2	3	2	3	3	2	10.6	10.6	10.6	36.294	330	330	2.29	5	7		5	0	9.3021	By MS/MS	By MS/MS	By MS/MS	By MS/MS	By MS/MS	By MS/MS	7.6
P13726	P13726	3	3	3	Tissue factor	F3	>P13726 Tissue factor OS=Homo sapiens OX=9606 GN=F3 PE=1 SV=1	1	3	3	3	1	0	2	0	2	0	1	0	2	0	2	0	1	0	2	0	2	0	12.9	12.9	12.9	33.067	295	295	2.6		3	1	1	0	8.7722	By MS/MS	By matching	By MS/MS	By matching	By MS/MS	By matching	5.8
P13796	P13796	19	13	13	Plastin-2	LCP1	>P13796 Plastin-2 OS=Homo sapiens OX=9606 GN=LCP1 PE=1 SV=6	1	19	13	13	17	18	13	16	16	18	11	12	9	11	10	12	11	12	9	11	10	12	35.7	27	27	70.288	627	627	3.18	15		33	47	0	115.36	By MS/MS	By MS/MS	By MS/MS	By MS/MS	By MS/MS	By MS/MS	31.1
P13797	P13797	22	22	15	Plastin-3	PLS3	>P13797 Plastin-3 OS=Homo sapiens OX=9606 GN=PLS3 PE=1 SV=4	1	22	22	15	21	19	14	18	19	14	21	19	14	18	19	14	14	12	10	12	12	7	37.5	37.5	26.5	70.81	630	630	2.58	15	31	63	11	0	114.55	By MS/MS	By MS/MS	By MS/MS	By MS/MS	By MS/MS	By MS/MS	37.5
P13798	P13798	3	3	3	Acylamino-acid-releasing enzyme	APEH	>P13798 Acylamino-acid-releasing enzyme OS=Homo sapiens OX=9606 GN=APEH PE=1 SV=4	1	3	3	3	1	3	0	1	1	1	1	3	0	1	1	1	1	3	0	1	1	1	3.6	3.6	3.6	81.224	732	732	2.11		8	1		0	2.8808	By matching	By MS/MS	By matching	By matching	By matching	By MS/MS	1.2
P13929	P13929	7	3	3	Beta-enolase	ENO3	>P13929 Beta-enolase OS=Homo sapiens OX=9606 GN=ENO3 PE=1 SV=5	1	7	3	3	6	6	5	6	6	6	3	3	3	3	3	3	3	3	3	3	3	3	24	9.4	9.4	46.986	434	434	3.56		8	5	35	0	70.204	By MS/MS	By MS/MS	By MS/MS	By MS/MS	By MS/MS	By MS/MS	22.1
P13987	P13987	3	3	3	CD59 glycoprotein	CD59	>P13987 CD59 glycoprotein OS=Homo sapiens OX=9606 GN=CD59 PE=1 SV=1	1	3	3	3	3	3	3	3	3	2	3	3	3	3	3	2	3	3	3	3	3	2	23.4	23.4	23.4	14.177	128	128	1.96	6	15	5		0	13.884	By MS/MS	By MS/MS	By MS/MS	By MS/MS	By MS/MS	By MS/MS	23.4
P14174	P14174	2	2	2	Macrophage migration inhibitory factor	MIF	>P14174 Macrophage migration inhibitory factor OS=Homo sapiens OX=9606 GN=MIF PE=1 SV=4	1	2	2	2	2	2	2	2	2	2	2	2	2	2	2	2	2	2	2	2	2	2	17.4	17.4	17.4	12.476	115	115	2.71	6			8	0	14.29	By MS/MS	By MS/MS	By MS/MS	By MS/MS	By MS/MS	By MS/MS	17.4
P14209	P14209	3	3	3	CD99 antigen	CD99	>P14209 CD99 antigen OS=Homo sapiens OX=9606 GN=CD99 PE=1 SV=1	1	3	3	3	0	0	0	1	3	1	0	0	0	1	3	1	0	0	0	1	3	1	28.6	28.6	28.6	18.848	185	185	1.5	3	3			0	36.904	By matching	By matching	By matching	By MS/MS	By MS/MS	By MS/MS	0
P14210	P14210	8	8	8	Hepatocyte growth factor;Hepatocyte growth factor alpha chain;Hepatocyte growth factor beta chain	HGF	>P14210 Hepatocyte growth factor OS=Homo sapiens OX=9606 GN=HGF PE=1 SV=2	1	8	8	8	0	0	0	0	8	3	0	0	0	0	8	3	0	0	0	0	8	3	13.3	13.3	13.3	83.133	728	728	2.25	2	5	5		0	37.374	By matching	By matching	By matching	By matching	By MS/MS	By matching	0
P14314	P14314	11	11	11	Glucosidase 2 subunit beta	PRKCSH	>P14314 Glucosidase 2 subunit beta OS=Homo sapiens OX=9606 GN=PRKCSH PE=1 SV=2	1	11	11	11	3	6	6	5	11	7	3	6	6	5	11	7	3	6	6	5	11	7	25	25	25	59.425	528	528	2.28	11	13	10	6	0	44.759	By MS/MS	By MS/MS	By MS/MS	By MS/MS	By MS/MS	By MS/MS	5.3
P14324	P14324	4	4	4	Farnesyl pyrophosphate synthase	FDPS	>P14324 Farnesyl pyrophosphate synthase OS=Homo sapiens OX=9606 GN=FDPS PE=1 SV=4	1	4	4	4	2	2	2	3	4	3	2	2	2	3	4	3	2	2	2	3	4	3	11.9	11.9	11.9	48.275	419	419	1.88	6	8		2	0	14.33	By MS/MS	By MS/MS	By MS/MS	By MS/MS	By MS/MS	By MS/MS	4.8
P14543	P14543	26	25	25	Nidogen-1	NID1	>P14543 Nidogen-1 OS=Homo sapiens OX=9606 GN=NID1 PE=1 SV=3	1	26	25	25	2	1	1	17	25	26	2	1	1	17	24	25	2	1	1	17	24	25	27.5	26.7	26.7	136.38	1247	1247	2.95	10	23	47	37	0	323.31	By MS/MS	By matching	By matching	By MS/MS	By MS/MS	By MS/MS	1.8
P14550	P14550	7	7	7	Alcohol dehydrogenase [NADP(+)]	AKR1A1	>P14550 Alcohol dehydrogenase [NADP(+)] OS=Homo sapiens OX=9606 GN=AKR1A1 PE=1 SV=3	1	7	7	7	7	7	7	7	7	6	7	7	7	7	7	6	7	7	7	7	7	6	25.2	25.2	25.2	36.573	325	325	2.54	22		16	18	0	80.047	By MS/MS	By MS/MS	By MS/MS	By MS/MS	By MS/MS	By MS/MS	25.2
P14618;P30613	P14618	30;1	30;1	30;1	Pyruvate kinase PKM	PKM	>P14618 Pyruvate kinase PKM OS=Homo sapiens OX=9606 GN=PKM PE=1 SV=4	2	30	30	30	30	29	27	29	29	28	30	29	27	29	29	28	30	29	27	29	29	28	66.9	66.9	66.9	57.936	531	531;574	2.7	44	52	162	48	0	323.31	By MS/MS	By MS/MS	By MS/MS	By MS/MS	By MS/MS	By MS/MS	66.9
P14625;Q58FF3	P14625	20;4	19;4	19;4	Endoplasmin	HSP90B1	>P14625 Endoplasmin OS=Homo sapiens OX=9606 GN=HSP90B1 PE=1 SV=1	2	20	19	19	18	18	18	20	20	20	17	17	17	19	19	19	17	17	17	19	19	19	27.6	26.2	26.2	92.468	803	803;399	2.66	27	54	42	49	0	191.23	By MS/MS	By MS/MS	By MS/MS	By MS/MS	By MS/MS	By MS/MS	24
P14780	P14780	21	21	21	Matrix metalloproteinase-9;67 kDa matrix metalloproteinase-9;82 kDa matrix metalloproteinase-9	MMP9	>P14780 Matrix metalloproteinase-9 OS=Homo sapiens OX=9606 GN=MMP9 PE=1 SV=3	1	21	21	21	12	5	21	0	0	2	12	5	21	0	0	2	12	5	21	0	0	2	30.6	30.6	30.6	78.457	707	707	2.38	11	15	10	9	0	82.701	By MS/MS	By MS/MS	By MS/MS	By matching	By matching	By matching	19.7
P14866;Q8WVV9	P14866	5;1	5;1	5;1	Heterogeneous nuclear ribonucleoprotein L	HNRNPL	>P14866 Heterogeneous nuclear ribonucleoprotein L OS=Homo sapiens OX=9606 GN=HNRNPL PE=1 SV=2	2	5	5	5	4	3	2	3	4	2	4	3	2	3	4	2	4	3	2	3	4	2	9.2	9.2	9.2	64.132	589	589;542	3.14		6	7	9	0	12.528	By MS/MS	By MS/MS	By matching	By MS/MS	By MS/MS	By MS/MS	7.5
P14868	P14868	8	8	8	Aspartate--tRNA ligase, cytoplasmic	DARS	>P14868 Aspartate--tRNA ligase, cytoplasmic OS=Homo sapiens OX=9606 GN=DARS PE=1 SV=2	1	8	8	8	8	7	3	6	8	4	8	7	3	6	8	4	8	7	3	6	8	4	18.8	18.8	18.8	57.136	501	501	2.7		21	6	10	0	18.264	By MS/MS	By MS/MS	By MS/MS	By MS/MS	By MS/MS	By MS/MS	18.8
P15104	P15104	5	5	5	Glutamine synthetase	GLUL	>P15104 Glutamine synthetase OS=Homo sapiens OX=9606 GN=GLUL PE=1 SV=4	1	5	5	5	2	2	2	4	5	4	2	2	2	4	5	4	2	2	2	4	5	4	17.4	17.4	17.4	42.064	373	373	2.37	5	6	4	4	0	27.278	By MS/MS	By MS/MS	By MS/MS	By MS/MS	By MS/MS	By MS/MS	7.8
P15121	P15121	9	9	8	Aldose reductase	AKR1B1	>P15121 Aldose reductase OS=Homo sapiens OX=9606 GN=AKR1B1 PE=1 SV=3	1	9	9	8	5	6	5	6	8	7	5	6	5	6	8	7	4	5	4	5	7	6	26.3	26.3	23.7	35.853	316	316	2.87	8	1	27	11	0	79.05	By MS/MS	By MS/MS	By MS/MS	By MS/MS	By MS/MS	By MS/MS	20.3
P15144	P15144	6	6	6	Aminopeptidase N	ANPEP	>P15144 Aminopeptidase N OS=Homo sapiens OX=9606 GN=ANPEP PE=1 SV=4	1	6	6	6	0	0	0	3	4	5	0	0	0	3	4	5	0	0	0	3	4	5	7.2	7.2	7.2	109.54	967	967	3	3	1	1	7	0	22.045	By matching	By matching	By matching	By MS/MS	By MS/MS	By MS/MS	0
P15291	P15291	4	4	4	Beta-1,4-galactosyltransferase 1;Lactose synthase A protein;N-acetyllactosamine synthase;Beta-N-acetylglucosaminylglycopeptide beta-1,4-galactosyltransferase;Beta-N-acetylglucosaminyl-glycolipid beta-1,4-galactosyltransferase;Processed beta-1,4-galactosyltransferase 1	B4GALT1	>P15291 Beta-1,4-galactosyltransferase 1 OS=Homo sapiens OX=9606 GN=B4GALT1 PE=1 SV=5	1	4	4	4	4	1	2	4	4	4	4	1	2	4	4	4	4	1	2	4	4	4	14.8	14.8	14.8	43.92	398	398	3.45		6		16	0	49.635	By MS/MS	By MS/MS	By MS/MS	By MS/MS	By MS/MS	By MS/MS	14.8
P15311	P15311	16	7	7	Ezrin	EZR	>P15311 Ezrin OS=Homo sapiens OX=9606 GN=EZR PE=1 SV=4	1	16	7	7	15	15	14	12	14	11	6	6	6	4	5	4	6	6	6	4	5	4	28.2	16.4	16.4	69.412	586	586	2.26	15	18	13	8	0	100.17	By MS/MS	By MS/MS	By MS/MS	By MS/MS	By MS/MS	By MS/MS	26.3
P15374	P15374	4	4	4	Ubiquitin carboxyl-terminal hydrolase isozyme L3	UCHL3	>P15374 Ubiquitin carboxyl-terminal hydrolase isozyme L3 OS=Homo sapiens OX=9606 GN=UCHL3 PE=1 SV=1	1	4	4	4	3	3	2	1	3	0	3	3	2	1	3	0	3	3	2	1	3	0	25.7	25.7	25.7	26.182	230	230	2.07	4	7	1	2	0	26.81	By MS/MS	By MS/MS	By MS/MS	By MS/MS	By MS/MS	By matching	18.7
P15531	P15531	6	2	2	Nucleoside diphosphate kinase A	NME1	>P15531 Nucleoside diphosphate kinase A OS=Homo sapiens OX=9606 GN=NME1 PE=1 SV=1	1	6	2	2	6	5	5	6	6	5	2	2	2	2	2	2	2	2	2	2	2	2	40.1	15.8	15.8	17.149	152	152	2.62	12			14	0	20.847	By MS/MS	By MS/MS	By MS/MS	By MS/MS	By MS/MS	By MS/MS	40.1
P15586	P15586	7	7	7	N-acetylglucosamine-6-sulfatase	GNS	>P15586 N-acetylglucosamine-6-sulfatase OS=Homo sapiens OX=9606 GN=GNS PE=1 SV=3	1	7	7	7	7	6	7	5	6	7	7	6	7	5	6	7	7	6	7	5	6	7	13.8	13.8	13.8	62.081	552	552	2.76	11		19	12	0	32.44	By MS/MS	By MS/MS	By MS/MS	By MS/MS	By MS/MS	By MS/MS	13.8
P15880	P15880	5	5	5	40S ribosomal protein S2	RPS2	>P15880 40S ribosomal protein S2 OS=Homo sapiens OX=9606 GN=RPS2 PE=1 SV=2	1	5	5	5	4	4	2	4	4	3	4	4	2	4	4	3	4	4	2	4	4	3	18.1	18.1	18.1	31.324	293	293	3.09		6	8	8	0	7.2049	By MS/MS	By MS/MS	By MS/MS	By MS/MS	By MS/MS	By MS/MS	14
P15924	P15924	3	3	3	Desmoplakin	DSP	>P15924 Desmoplakin OS=Homo sapiens OX=9606 GN=DSP PE=1 SV=3	1	3	3	3	3	2	3	1	2	3	3	2	3	1	2	3	3	2	3	1	2	3	1	1	1	331.77	2871	2871	2.88	6			10	0	4.2032	By MS/MS	By MS/MS	By MS/MS	By matching	By MS/MS	By MS/MS	1
P16035	P16035	7	7	7	Metalloproteinase inhibitor 2	TIMP2	>P16035 Metalloproteinase inhibitor 2 OS=Homo sapiens OX=9606 GN=TIMP2 PE=1 SV=2	1	7	7	7	5	5	5	5	6	6	5	5	5	5	6	6	5	5	5	5	6	6	32.7	32.7	32.7	24.399	220	220	1.55	24	13		3	0	34.451	By MS/MS	By MS/MS	By MS/MS	By MS/MS	By MS/MS	By MS/MS	21.8
P16070	P16070	7	7	7	CD44 antigen	CD44	>P16070 CD44 antigen OS=Homo sapiens OX=9606 GN=CD44 PE=1 SV=3	1	7	7	7	0	3	0	5	7	4	0	3	0	5	7	4	0	3	0	5	7	4	10.2	10.2	10.2	81.537	742	742	2.18	8	8		6	0	16.022	By matching	By MS/MS	By matching	By MS/MS	By MS/MS	By MS/MS	0
P16152;O75828	P16152	5;1	5;1	5;1	Carbonyl reductase [NADPH] 1	CBR1	>P16152 Carbonyl reductase [NADPH] 1 OS=Homo sapiens OX=9606 GN=CBR1 PE=1 SV=3	2	5	5	5	1	1	0	4	4	1	1	1	0	4	4	1	1	1	0	4	4	1	23.5	23.5	23.5	30.375	277	277;277	3.36	1	1	2	7	0	10.31	By MS/MS	By matching	By matching	By MS/MS	By MS/MS	By MS/MS	5.1
P16278	P16278	3	3	3	Beta-galactosidase	GLB1	>P16278 Beta-galactosidase OS=Homo sapiens OX=9606 GN=GLB1 PE=1 SV=2	1	3	3	3	1	1	2	3	2	2	1	1	2	3	2	2	1	1	2	3	2	2	6.2	6.2	6.2	76.074	677	677	2.25	7			5	0	20.002	By MS/MS	By matching	By MS/MS	By MS/MS	By MS/MS	By MS/MS	1.8
P16298	P16298	6	6	2	Serine/threonine-protein phosphatase 2B catalytic subunit beta isoform	PPP3CB	>P16298 Serine/threonine-protein phosphatase 2B catalytic subunit beta isoform OS=Homo sapiens OX=9606 GN=PPP3CB PE=1 SV=2	1	6	6	2	5	5	3	3	4	3	5	5	3	3	4	3	2	2	1	0	1	1	12	12	4.8	59.024	524	524	2.61	8	4		11	0	9.4919	By MS/MS	By MS/MS	By MS/MS	By MS/MS	By MS/MS	By MS/MS	10.1
P16519	P16519	6	6	6	Neuroendocrine convertase 2	PCSK2	>P16519 Neuroendocrine convertase 2 OS=Homo sapiens OX=9606 GN=PCSK2 PE=1 SV=2	1	6	6	6	4	4	5	5	4	4	4	4	5	5	4	4	4	4	5	5	4	4	12.5	12.5	12.5	70.564	638	638	2.61		13	20		0	53.512	By MS/MS	By MS/MS	By MS/MS	By MS/MS	By MS/MS	By MS/MS	7.5
P16870	P16870	14	14	14	Carboxypeptidase E	CPE	>P16870 Carboxypeptidase E OS=Homo sapiens OX=9606 GN=CPE PE=1 SV=1	1	14	14	14	8	11	8	9	9	13	8	11	8	9	9	13	8	11	8	9	9	13	35.5	35.5	35.5	53.15	476	476	2.6	10	27	24	16	0	161.03	By MS/MS	By MS/MS	By MS/MS	By MS/MS	By MS/MS	By MS/MS	20.4
P16930	P16930	6	6	6	Fumarylacetoacetase	FAH	>P16930 Fumarylacetoacetase OS=Homo sapiens OX=9606 GN=FAH PE=1 SV=2	1	6	6	6	2	2	2	6	6	4	2	2	2	6	6	4	2	2	2	6	6	4	15.5	15.5	15.5	46.374	419	419	3.29		2	13	9	0	10.877	By MS/MS	By MS/MS	By MS/MS	By MS/MS	By MS/MS	By MS/MS	5.3
P16949	P16949	4	4	3	Stathmin	STMN1	>P16949 Stathmin OS=Homo sapiens OX=9606 GN=STMN1 PE=1 SV=3	1	4	4	3	4	4	4	4	4	3	4	4	4	4	4	3	3	3	3	3	3	2	28.2	28.2	22.1	17.302	149	149	2.32	12		11	5	0	10.563	By MS/MS	By MS/MS	By MS/MS	By MS/MS	By MS/MS	By MS/MS	28.2
P17050	P17050	2	2	2	Alpha-N-acetylgalactosaminidase	NAGA	>P17050 Alpha-N-acetylgalactosaminidase OS=Homo sapiens OX=9606 GN=NAGA PE=1 SV=2	1	2	2	2	2	1	0	1	1	0	2	1	0	1	1	0	2	1	0	1	1	0	6.3	6.3	6.3	46.564	411	411	3			5		0	8.8299	By MS/MS	By MS/MS	By matching	By matching	By MS/MS	By matching	6.3
P17174	P17174	6	6	6	Aspartate aminotransferase, cytoplasmic	GOT1	>P17174 Aspartate aminotransferase, cytoplasmic OS=Homo sapiens OX=9606 GN=GOT1 PE=1 SV=3	1	6	6	6	5	5	4	4	6	4	5	5	4	4	6	4	5	5	4	4	6	4	17.9	17.9	17.9	46.247	413	413	3.25		4	16	12	0	15.898	By MS/MS	By MS/MS	By MS/MS	By MS/MS	By MS/MS	By MS/MS	12.8
P17600;Q92777	P17600	3;1	3;1	3;1	Synapsin-1	SYN1	>P17600 Synapsin-1 OS=Homo sapiens OX=9606 GN=SYN1 PE=1 SV=3	2	3	3	3	3	3	2	3	2	2	3	3	2	3	2	2	3	3	2	3	2	2	5.7	5.7	5.7	74.111	705	705;582	3.44			9	7	0	10.957	By MS/MS	By MS/MS	By MS/MS	By MS/MS	By MS/MS	By MS/MS	5.7
P22694;P17612	P22694;P17612	2;2	2;2	2;2	cAMP-dependent protein kinase catalytic subunit beta;cAMP-dependent protein kinase catalytic subunit alpha	PRKACB;PRKACA	>P22694 cAMP-dependent protein kinase catalytic subunit beta OS=Homo sapiens OX=9606 GN=PRKACB PE=1 SV=2;>P17612 cAMP-dependent protein kinase catalytic subunit alpha OS=Homo sapiens OX=9606 GN=PRKACA PE=1 SV=2	2	2	2	2	1	1	1	1	2	1	1	1	1	1	2	1	1	1	1	1	2	1	5.1	5.1	5.1	40.622	351	351;351	3			7		0.0023433	2.1206	By matching	By MS/MS	By matching	By matching	By MS/MS	By matching	2.6
P17655	P17655	8	8	8	Calpain-2 catalytic subunit	CAPN2	>P17655 Calpain-2 catalytic subunit OS=Homo sapiens OX=9606 GN=CAPN2 PE=1 SV=6	1	8	8	8	6	4	3	6	6	5	6	4	3	6	6	5	6	4	3	6	6	5	11.9	11.9	11.9	79.994	700	700	2.71	6	11	5	13	0	20.952	By MS/MS	By MS/MS	By MS/MS	By MS/MS	By MS/MS	By MS/MS	8.1
P17661	P17661	10	6	6	Desmin	DES	>P17661 Desmin OS=Homo sapiens OX=9606 GN=DES PE=1 SV=3	1	10	6	6	8	8	9	8	10	6	5	4	6	5	6	3	5	4	6	5	6	3	19.4	12.1	12.1	53.535	470	470	1.67	10	20			0	15.29	By MS/MS	By MS/MS	By MS/MS	By MS/MS	By MS/MS	By MS/MS	15.5
P17812;Q9NRF8	P17812	4;1	4;1	4;1	CTP synthase 1	CTPS1	>P17812 CTP synthase 1 OS=Homo sapiens OX=9606 GN=CTPS1 PE=1 SV=2	2	4	4	4	4	2	3	2	2	1	4	2	3	2	2	1	4	2	3	2	2	1	8.6	8.6	8.6	66.69	591	591;586	2.14	5	2	7		0	30.434	By MS/MS	By MS/MS	By MS/MS	By MS/MS	By MS/MS	By MS/MS	8.6
P17858	P17858	3	2	2	ATP-dependent 6-phosphofructokinase, liver type	PFKL	>P17858 ATP-dependent 6-phosphofructokinase, liver type OS=Homo sapiens OX=9606 GN=PFKL PE=1 SV=6	1	3	2	2	2	3	1	1	3	3	1	2	0	0	2	2	1	2	0	0	2	2	5.6	4.5	4.5	85.018	780	780	1.82	8			3	0	31.352	By MS/MS	By MS/MS	By matching	By matching	By matching	By MS/MS	3.3
P17900	P17900	2	2	2	Ganglioside GM2 activator;Ganglioside GM2 activator isoform short	GM2A	>P17900 Ganglioside GM2 activator OS=Homo sapiens OX=9606 GN=GM2A PE=1 SV=4	1	2	2	2	2	2	2	2	2	2	2	2	2	2	2	2	2	2	2	2	2	2	9.3	9.3	9.3	20.838	193	193	3			12		0	4.614	By MS/MS	By MS/MS	By MS/MS	By MS/MS	By MS/MS	By MS/MS	9.3
P17931	P17931	4	4	4	Galectin-3	LGALS3	>P17931 Galectin-3 OS=Homo sapiens OX=9606 GN=LGALS3 PE=1 SV=5	1	4	4	4	4	2	4	1	2	2	4	2	4	1	2	2	4	2	4	1	2	2	15.6	15.6	15.6	26.152	250	250	2.65		6	11		0	15.874	By MS/MS	By matching	By MS/MS	By matching	By matching	By MS/MS	15.6
P17936	P17936	13	13	13	Insulin-like growth factor-binding protein 3	IGFBP3	>P17936 Insulin-like growth factor-binding protein 3 OS=Homo sapiens OX=9606 GN=IGFBP3 PE=1 SV=2	1	13	13	13	13	11	11	10	13	12	13	11	11	10	13	12	13	11	11	10	13	12	44.3	44.3	44.3	31.674	291	291	2.28	38	25	42	15	0	239.21	By MS/MS	By MS/MS	By MS/MS	By MS/MS	By MS/MS	By MS/MS	44.3
P17948	P17948	7	7	7	Vascular endothelial growth factor receptor 1	FLT1	>P17948 Vascular endothelial growth factor receptor 1 OS=Homo sapiens OX=9606 GN=FLT1 PE=1 SV=2	1	7	7	7	1	0	1	6	6	6	1	0	1	6	6	6	1	0	1	6	6	6	6.5	6.5	6.5	150.77	1338	1338	3		8	4	8	0	11.217	By matching	By matching	By matching	By MS/MS	By MS/MS	By MS/MS	0.6
P17980	P17980	8	8	8	26S protease regulatory subunit 6A	PSMC3	>P17980 26S proteasome regulatory subunit 6A OS=Homo sapiens OX=9606 GN=PSMC3 PE=1 SV=3	1	8	8	8	7	8	3	5	5	3	7	8	3	5	5	3	7	8	3	5	5	3	25.5	25.5	25.5	49.203	439	439	3.19		8	9	14	0	27.982	By MS/MS	By MS/MS	By MS/MS	By MS/MS	By MS/MS	By MS/MS	21.9
P17987	P17987	9	9	9	T-complex protein 1 subunit alpha	TCP1	>P17987 T-complex protein 1 subunit alpha OS=Homo sapiens OX=9606 GN=TCP1 PE=1 SV=1	1	9	9	9	9	6	4	4	6	6	9	6	4	4	6	6	9	6	4	4	6	6	22.7	22.7	22.7	60.343	556	556	2.72	7	9	20	10	0	35.023	By MS/MS	By MS/MS	By MS/MS	By MS/MS	By MS/MS	By MS/MS	22.7
P18065	P18065	12	12	12	Insulin-like growth factor-binding protein 2	IGFBP2	>P18065 Insulin-like growth factor-binding protein 2 OS=Homo sapiens OX=9606 GN=IGFBP2 PE=1 SV=2	1	12	12	12	11	9	12	1	4	10	11	9	12	1	4	10	11	9	12	1	4	10	48.6	48.6	48.6	34.814	325	325	2.73	9	25	8	25	0	257.36	By MS/MS	By MS/MS	By MS/MS	By matching	By MS/MS	By MS/MS	44.9
P18085	P18085	7	4	4	ADP-ribosylation factor 4	ARF4	>P18085 ADP-ribosylation factor 4 OS=Homo sapiens OX=9606 GN=ARF4 PE=1 SV=3	1	7	4	4	4	6	4	5	7	2	3	3	3	3	4	0	3	3	3	3	4	0	50	22.2	22.2	20.511	180	180	3.5			10	10	0	6.3931	By MS/MS	By MS/MS	By MS/MS	By MS/MS	By MS/MS	By matching	20
P18206	P18206	41	41	41	Vinculin	VCL	>P18206 Vinculin OS=Homo sapiens OX=9606 GN=VCL PE=1 SV=4	1	41	41	41	37	38	30	39	41	36	37	38	30	39	41	36	37	38	30	39	41	36	44.5	44.5	44.5	123.8	1134	1134	2.47	64	78	76	60	0	323.31	By MS/MS	By MS/MS	By MS/MS	By MS/MS	By MS/MS	By MS/MS	39.6
P18669;P15259	P18669;P15259	12;6	12;6	9;4	Phosphoglycerate mutase 1;Phosphoglycerate mutase 2	PGAM1;PGAM2	>P18669 Phosphoglycerate mutase 1 OS=Homo sapiens OX=9606 GN=PGAM1 PE=1 SV=2;>P15259 Phosphoglycerate mutase 2 OS=Homo sapiens OX=9606 GN=PGAM2 PE=1 SV=3	2	12	12	9	11	12	11	12	12	11	11	12	11	12	12	11	8	9	8	9	9	8	57.1	57.1	39.4	28.804	254	254;253	2.93	7	43	60	46	0	288.57	By MS/MS	By MS/MS	By MS/MS	By MS/MS	By MS/MS	By MS/MS	51.2
P19021	P19021	14	14	14	Peptidyl-glycine alpha-amidating monooxygenase;Peptidylglycine alpha-hydroxylating monooxygenase;Peptidyl-alpha-hydroxyglycine alpha-amidating lyase	PAM	>P19021 Peptidyl-glycine alpha-amidating monooxygenase OS=Homo sapiens OX=9606 GN=PAM PE=1 SV=2	1	14	14	14	9	8	8	8	11	9	9	8	8	8	11	9	9	8	8	8	11	9	14.9	14.9	14.9	108.33	973	973	3.2	4	7	26	28	0	37.703	By MS/MS	By MS/MS	By MS/MS	By MS/MS	By MS/MS	By MS/MS	9.2
P19022	P19022	9	9	9	Cadherin-2	CDH2	>P19022 Cadherin-2 OS=Homo sapiens OX=9606 GN=CDH2 PE=1 SV=4	1	9	9	9	2	4	0	8	9	5	2	4	0	8	9	5	2	4	0	8	9	5	12.1	12.1	12.1	99.808	906	906	2.08	12	16	9	3	0	74.261	By MS/MS	By MS/MS	By matching	By MS/MS	By MS/MS	By MS/MS	4.1
P19338	P19338	18	18	18	Nucleolin	NCL	>P19338 Nucleolin OS=Homo sapiens OX=9606 GN=NCL PE=1 SV=3	1	18	18	18	15	15	10	15	18	14	15	15	10	15	18	14	15	15	10	15	18	14	24.6	24.6	24.6	76.613	710	710	2.16	21	42	30	3	0	87.384	By MS/MS	By MS/MS	By MS/MS	By MS/MS	By MS/MS	By MS/MS	21
P19367;Q2TB90;P52789;P52790	P19367	15;2;1;1	15;2;1;1	15;2;1;1	Hexokinase-1	HK1	>P19367 Hexokinase-1 OS=Homo sapiens OX=9606 GN=HK1 PE=1 SV=3	4	15	15	15	11	11	5	8	11	8	11	11	5	8	11	8	11	11	5	8	11	8	17.9	17.9	17.9	102.48	917	917;917;917;923	3.06	5	13	10	26	0	28.626	By MS/MS	By MS/MS	By MS/MS	By MS/MS	By MS/MS	By MS/MS	12.9
P19876;P19875	P19876;P19875	4;2	4;2	3;1	C-X-C motif chemokine 3;GRO-gamma(5-73);C-X-C motif chemokine 2;GRO-beta(5-73)	CXCL3;CXCL2	>P19876 C-X-C motif chemokine 3 OS=Homo sapiens OX=9606 GN=CXCL3 PE=1 SV=1;>P19875 C-X-C motif chemokine 2 OS=Homo sapiens OX=9606 GN=CXCL2 PE=1 SV=1	2	4	4	3	1	2	1	4	4	4	1	2	1	4	4	4	1	2	1	3	3	3	45.8	45.8	30.8	11.342	107	107;107	3.05		6	7	7	0	59.848	By matching	By MS/MS	By matching	By MS/MS	By MS/MS	By MS/MS	7.5
P19883	P19883	6	6	6	Follistatin	FST	>P19883 Follistatin OS=Homo sapiens OX=9606 GN=FST PE=1 SV=2	1	6	6	6	0	0	0	1	5	5	0	0	0	1	5	5	0	0	0	1	5	5	24.1	24.1	24.1	38.007	344	344	1.82	4	5	2		0	17.162	By matching	By matching	By matching	By MS/MS	By MS/MS	By MS/MS	0
P20042	P20042	4	4	4	Eukaryotic translation initiation factor 2 subunit 2	EIF2S2	>P20042 Eukaryotic translation initiation factor 2 subunit 2 OS=Homo sapiens OX=9606 GN=EIF2S2 PE=1 SV=2	1	4	4	4	4	3	4	3	4	2	4	3	4	3	4	2	4	3	4	3	4	2	14.1	14.1	14.1	38.388	333	333	1.55	9	11			0	13.061	By MS/MS	By MS/MS	By MS/MS	By MS/MS	By MS/MS	By MS/MS	14.1
P20073	P20073	4	4	4	Annexin A7	ANXA7	>P20073 Annexin A7 OS=Homo sapiens OX=9606 GN=ANXA7 PE=1 SV=3	1	4	4	4	4	2	0	2	2	2	4	2	0	2	2	2	4	2	0	2	2	2	8.8	8.8	8.8	52.739	488	488	3.08		5	1	6	0	5.0351	By MS/MS	By MS/MS	By matching	By MS/MS	By MS/MS	By MS/MS	8.8
P20336;P20337	P20336	7;1	7;1	4;0	Ras-related protein Rab-3A	RAB3A	>P20336 Ras-related protein Rab-3A OS=Homo sapiens OX=9606 GN=RAB3A PE=1 SV=1	2	7	7	4	6	6	3	7	7	7	6	6	3	7	7	7	4	3	2	4	4	4	42.7	42.7	26.8	24.984	220	220;219	2.95	7	7	11	19	0	20.035	By MS/MS	By MS/MS	By MS/MS	By MS/MS	By MS/MS	By MS/MS	34.1
P20340;Q9NRW1;Q14964	P20340;Q9NRW1	4;3;1	4;3;1	4;3;1	Ras-related protein Rab-6A;Ras-related protein Rab-6B	RAB6A;RAB6B	>P20340 Ras-related protein Rab-6A OS=Homo sapiens OX=9606 GN=RAB6A PE=1 SV=3;>Q9NRW1 Ras-related protein Rab-6B OS=Homo sapiens OX=9606 GN=RAB6B PE=1 SV=1	3	4	4	4	3	4	3	3	3	2	3	4	3	3	3	2	3	4	3	3	3	2	22.1	22.1	22.1	23.593	208	208;208;217	3.62			8	13	0	18.43	By MS/MS	By MS/MS	By MS/MS	By MS/MS	By MS/MS	By MS/MS	16.3
P20618	P20618	6	6	6	Proteasome subunit beta type-1	PSMB1	>P20618 Proteasome subunit beta type-1 OS=Homo sapiens OX=9606 GN=PSMB1 PE=1 SV=2	1	6	6	6	5	5	5	5	5	4	5	5	5	5	5	4	5	5	5	5	5	4	34.9	34.9	34.9	26.489	241	241	3.21	4	3	15	20	0	108.56	By MS/MS	By MS/MS	By MS/MS	By MS/MS	By MS/MS	By MS/MS	30.7
P20700	P20700	10	10	10	Lamin-B1	LMNB1	>P20700 Lamin-B1 OS=Homo sapiens OX=9606 GN=LMNB1 PE=1 SV=2	1	10	10	10	7	6	3	6	7	7	7	6	3	6	7	7	7	6	3	6	7	7	20.6	20.6	20.6	66.408	586	586	2.17	9	18	3	6	0	49.19	By MS/MS	By MS/MS	By MS/MS	By MS/MS	By MS/MS	By MS/MS	14.2
P20774	P20774	3	3	3	Mimecan	OGN	>P20774 Mimecan OS=Homo sapiens OX=9606 GN=OGN PE=1 SV=1	1	3	3	3	3	1	1	3	3	2	3	1	1	3	3	2	3	1	1	3	3	2	11.7	11.7	11.7	33.922	298	298	2.69		5	7	1	0	12.247	By MS/MS	By matching	By MS/MS	By MS/MS	By MS/MS	By MS/MS	11.7
P20810	P20810	6	6	6	Calpastatin	CAST	>P20810 Calpastatin OS=Homo sapiens OX=9606 GN=CAST PE=1 SV=4	1	6	6	6	5	2	3	0	2	1	5	2	3	0	2	1	5	2	3	0	2	1	16.2	16.2	16.2	76.572	708	708	3.21		2	7	5	0	22.678	By MS/MS	By MS/MS	By MS/MS	By matching	By MS/MS	By MS/MS	14.4
P20908;P25940	P20908	38;1	37;1	33;0	Collagen alpha-1(V) chain	COL5A1	>P20908 Collagen alpha-1(V) chain OS=Homo sapiens OX=9606 GN=COL5A1 PE=1 SV=3	2	38	37	33	23	20	20	38	37	35	23	20	20	37	36	34	23	19	19	33	33	30	22.5	22	20.4	183.56	1838	1838;1745	2.82	53	44	130	93	0	323.31	By MS/MS	By MS/MS	By MS/MS	By MS/MS	By MS/MS	By MS/MS	14
P60891;P21108;P11908	P60891;P21108	3;3;1	3;3;1	3;3;1	Ribose-phosphate pyrophosphokinase 1;Ribose-phosphate pyrophosphokinase 3	PRPS1;PRPS1L1	>P60891 Ribose-phosphate pyrophosphokinase 1 OS=Homo sapiens OX=9606 GN=PRPS1 PE=1 SV=2;>P21108 Ribose-phosphate pyrophosphokinase 3 OS=Homo sapiens OX=9606 GN=PRPS1L1 PE=1 SV=2	3	3	3	3	3	2	3	3	3	3	3	2	3	3	3	3	3	2	3	3	3	3	10.4	10.4	10.4	34.834	318	318;318;318	2.4	5	2	13		0	10.185	By MS/MS	By MS/MS	By MS/MS	By MS/MS	By MS/MS	By MS/MS	10.4
P21266	P21266	5	4	3	Glutathione S-transferase Mu 3	GSTM3	>P21266 Glutathione S-transferase Mu 3 OS=Homo sapiens OX=9606 GN=GSTM3 PE=1 SV=3	1	5	4	3	3	3	3	5	5	4	2	2	2	4	4	3	1	1	1	3	3	2	22.2	19.1	15.1	26.559	225	225	3.33			14	7	0	17.442	By MS/MS	By MS/MS	By MS/MS	By MS/MS	By MS/MS	By MS/MS	11.1
P21281;P15313	P21281	11;4	11;4	11;4	V-type proton ATPase subunit B, brain isoform	ATP6V1B2	>P21281 V-type proton ATPase subunit B, brain isoform OS=Homo sapiens OX=9606 GN=ATP6V1B2 PE=1 SV=3	2	11	11	11	10	11	8	11	10	10	10	11	8	11	10	10	10	11	8	11	10	10	29.2	29.2	29.2	56.5	511	511;513	2.96	15	12	6	39	0	71.002	By MS/MS	By MS/MS	By MS/MS	By MS/MS	By MS/MS	By MS/MS	27
P21283;Q8NEY4	P21283	8;1	8;1	8;1	V-type proton ATPase subunit C 1	ATP6V1C1	>P21283 V-type proton ATPase subunit C 1 OS=Homo sapiens OX=9606 GN=ATP6V1C1 PE=1 SV=4	2	8	8	8	5	6	5	7	8	7	5	6	5	7	8	7	5	6	5	7	8	7	22	22	22	43.941	382	382;427	3.33	5		15	25	0	28.023	By MS/MS	By MS/MS	By MS/MS	By MS/MS	By MS/MS	By MS/MS	14.9
P21291	P21291	6	6	6	Cysteine and glycine-rich protein 1	CSRP1	>P21291 Cysteine and glycine-rich protein 1 OS=Homo sapiens OX=9606 GN=CSRP1 PE=1 SV=3	1	6	6	6	4	2	2	6	6	3	4	2	2	6	6	3	4	2	2	6	6	3	42	42	42	20.567	193	193	2.06	2	30	4		0	82.627	By MS/MS	By MS/MS	By MS/MS	By MS/MS	By MS/MS	By MS/MS	34.2
P21333	P21333	74	66	64	Filamin-A	FLNA	>P21333 Filamin-A OS=Homo sapiens OX=9606 GN=FLNA PE=1 SV=4	1	74	66	64	67	54	41	65	68	59	59	48	34	58	60	52	57	48	33	56	58	50	38.5	35.7	34.5	280.74	2647	2647	2.49	97	108	112	93	0	323.31	By MS/MS	By MS/MS	By MS/MS	By MS/MS	By MS/MS	By MS/MS	35.3
P21399	P21399	6	6	6	Cytoplasmic aconitate hydratase	ACO1	>P21399 Cytoplasmic aconitate hydratase OS=Homo sapiens OX=9606 GN=ACO1 PE=1 SV=3	1	6	6	6	3	4	3	4	5	3	3	4	3	4	5	3	3	4	3	4	5	3	9.2	9.2	9.2	98.398	889	889	1.75	16		6	2	0	31.78	By MS/MS	By MS/MS	By MS/MS	By MS/MS	By MS/MS	By MS/MS	4.9
P21589	P21589	2	2	2	5-nucleotidase	NT5E	>P21589 5-nucleotidase OS=Homo sapiens OX=9606 GN=NT5E PE=1 SV=1	1	2	2	2	2	1	1	2	2	1	2	1	1	2	2	1	2	1	1	2	2	1	5.2	5.2	5.2	63.367	574	574	4				10	0	3.9089	By matching	By matching	By matching	By matching	By MS/MS	By matching	5.2
P21810	P21810	10	9	9	Biglycan	BGN	>P21810 Biglycan OS=Homo sapiens OX=9606 GN=BGN PE=1 SV=2	1	10	9	9	4	9	3	9	9	10	4	8	2	8	8	9	4	8	2	8	8	9	37.5	35.3	35.3	41.654	368	368	3.12		17	34	26	0	212.42	By MS/MS	By MS/MS	By MS/MS	By MS/MS	By MS/MS	By MS/MS	14.7
P21980;O43548	P21980	14;1	14;1	14;1	Protein-glutamine gamma-glutamyltransferase 2	TGM2	>P21980 Protein-glutamine gamma-glutamyltransferase 2 OS=Homo sapiens OX=9606 GN=TGM2 PE=1 SV=2	2	14	14	14	13	11	10	5	11	5	13	11	10	5	11	5	13	11	10	5	11	5	24.2	24.2	24.2	77.328	687	687;720	2.12	26	12	11	11	0	99.757	By MS/MS	By MS/MS	By MS/MS	By matching	By MS/MS	By MS/MS	22.3
P22033	P22033	2	2	2	Methylmalonyl-CoA mutase, mitochondrial	MUT	>P22033 Methylmalonyl-CoA mutase, mitochondrial OS=Homo sapiens OX=9606 GN=MUT PE=1 SV=4	1	2	2	2	1	2	1	1	1	1	1	2	1	1	1	1	1	2	1	1	1	1	3.2	3.2	3.2	83.134	750	750	1.14	6	1			0	2.8157	By matching	By MS/MS	By MS/MS	By matching	By MS/MS	By MS/MS	1.5
P22059	P22059	2	2	2	Oxysterol-binding protein 1	OSBP	>P22059 Oxysterol-binding protein 1 OS=Homo sapiens OX=9606 GN=OSBP PE=1 SV=1	1	2	2	2	2	2	0	1	1	0	2	2	0	1	1	0	2	2	0	1	1	0	3.2	3.2	3.2	89.42	807	807	2		6			0.00063251	2.7228	By matching	By matching	By matching	By MS/MS	By MS/MS	By matching	3.2
P22061	P22061	6	6	6	Protein-L-isoaspartate(D-aspartate) O-methyltransferase	PCMT1	>P22061 Protein-L-isoaspartate(D-aspartate) O-methyltransferase OS=Homo sapiens OX=9606 GN=PCMT1 PE=1 SV=4	1	6	6	6	5	5	4	5	6	5	5	5	4	5	6	5	5	5	4	5	6	5	33	33	33	24.636	227	227	3.17	1	6	29	17	0	184.09	By MS/MS	By MS/MS	By MS/MS	By MS/MS	By MS/MS	By MS/MS	26.4
P22102	P22102	5	5	5	Trifunctional purine biosynthetic protein adenosine-3;Phosphoribosylamine--glycine ligase;Phosphoribosylformylglycinamidine cyclo-ligase;Phosphoribosylglycinamide formyltransferase	GART	>P22102 Trifunctional purine biosynthetic protein adenosine-3 OS=Homo sapiens OX=9606 GN=GART PE=1 SV=1	1	5	5	5	4	4	2	4	4	3	4	4	2	4	4	3	4	4	2	4	4	3	5.4	5.4	5.4	107.77	1010	1010	3.38		4	7	13	0	8.4218	By MS/MS	By MS/MS	By matching	By MS/MS	By MS/MS	By MS/MS	4.1
P22105;Q16473;REV__Q96CG3	P22105	69;8;1	69;8;1	69;8;1	Tenascin-X	TNXB	>P22105 Tenascin-X OS=Homo sapiens OX=9606 GN=TNXB PE=1 SV=4	3	69	69	69	50	15	65	0	0	2	50	15	65	0	0	2	50	15	65	0	0	2	26.9	26.9	26.9	458.22	4242	4242;311;184	2.34	42	58	39	30	0	286.31	By MS/MS	By MS/MS	By MS/MS	By matching	By matching	By matching	21.1
P22234	P22234	7	7	7	Multifunctional protein ADE2;Phosphoribosylaminoimidazole-succinocarboxamide synthase;Phosphoribosylaminoimidazole carboxylase	PAICS	>P22234 Multifunctional protein ADE2 OS=Homo sapiens OX=9606 GN=PAICS PE=1 SV=3	1	7	7	7	5	6	4	6	6	6	5	6	4	6	6	6	5	6	4	6	6	6	20.2	20.2	20.2	47.079	425	425	2.76		15	17	6	0	37.831	By MS/MS	By MS/MS	By MS/MS	By MS/MS	By MS/MS	By MS/MS	13.9
P22314	P22314	16	16	16	Ubiquitin-like modifier-activating enzyme 1	UBA1	>P22314 Ubiquitin-like modifier-activating enzyme 1 OS=Homo sapiens OX=9606 GN=UBA1 PE=1 SV=3	1	16	16	16	14	12	10	13	14	11	14	12	10	13	14	11	14	12	10	13	14	11	19.5	19.5	19.5	117.85	1058	1058	2.59	15	37	15	28	0	147.41	By MS/MS	By MS/MS	By MS/MS	By MS/MS	By MS/MS	By MS/MS	17
P22352	P22352	3	3	3	Glutathione peroxidase 3	GPX3	>P22352 Glutathione peroxidase 3 OS=Homo sapiens OX=9606 GN=GPX3 PE=1 SV=2	1	3	3	3	2	2	2	2	3	1	2	2	2	2	3	1	2	2	2	2	3	1	14.6	14.6	14.6	25.552	226	226	2.79	7	1		11	0	4.1371	By MS/MS	By MS/MS	By MS/MS	By MS/MS	By MS/MS	By MS/MS	8.4
P22392;O60361	P22392;O60361	8;6	8;6	4;4	Nucleoside diphosphate kinase B;Putative nucleoside diphosphate kinase	NME2;NME2P1	>P22392 Nucleoside diphosphate kinase B OS=Homo sapiens OX=9606 GN=NME2 PE=1 SV=1;>O60361 Putative nucleoside diphosphate kinase OS=Homo sapiens OX=9606 GN=NME2P1 PE=5 SV=1	2	8	8	4	8	7	6	8	8	7	8	7	6	8	8	7	4	4	3	4	4	4	48	48	23.7	17.298	152	152;137	2.7	14	28	36	25	0	81.086	By MS/MS	By MS/MS	By MS/MS	By MS/MS	By MS/MS	By MS/MS	48
P22626	P22626	12	12	12	Heterogeneous nuclear ribonucleoproteins A2/B1	HNRNPA2B1	>P22626 Heterogeneous nuclear ribonucleoproteins A2/B1 OS=Homo sapiens OX=9606 GN=HNRNPA2B1 PE=1 SV=2	1	12	12	12	12	11	11	11	9	10	12	11	11	11	9	10	12	11	11	11	9	10	39.9	39.9	39.9	37.429	353	353	2.17	23	37	22	8	0	103.25	By MS/MS	By MS/MS	By MS/MS	By MS/MS	By MS/MS	By MS/MS	39.9
P22676;P05937	P22676	8;1	8;1	8;1	Calretinin	CALB2	>P22676 Calretinin OS=Homo sapiens OX=9606 GN=CALB2 PE=2 SV=2	2	8	8	8	2	6	3	4	5	5	2	6	3	4	5	5	2	6	3	4	5	5	32.1	32.1	32.1	31.54	271	271;261	1.63	18	2	6	1	0	22.547	By MS/MS	By MS/MS	By MS/MS	By MS/MS	By MS/MS	By MS/MS	7
P22692	P22692	9	9	9	Insulin-like growth factor-binding protein 4	IGFBP4	>P22692 Insulin-like growth factor-binding protein 4 OS=Homo sapiens OX=9606 GN=IGFBP4 PE=1 SV=2	1	9	9	9	6	5	5	8	8	9	6	5	5	8	8	9	6	5	5	8	8	9	38.8	38.8	38.8	27.934	258	258	1.98	17	52	7	4	0	98.133	By MS/MS	By MS/MS	By MS/MS	By MS/MS	By MS/MS	By MS/MS	23.6
P23142	P23142	17	17	9	Fibulin-1	FBLN1	>P23142 Fibulin-1 OS=Homo sapiens OX=9606 GN=FBLN1 PE=1 SV=4	1	17	17	9	11	9	7	12	15	17	11	9	7	12	15	17	4	4	0	5	8	9	35.7	35.7	20.9	77.213	703	703	2.46	35	11	25	28	0	323.31	By MS/MS	By MS/MS	By MS/MS	By MS/MS	By MS/MS	By MS/MS	20.5
P23193;Q15560	P23193;Q15560	4;2	4;2	4;2	Transcription elongation factor A protein 1;Transcription elongation factor A protein 2	TCEA1;TCEA2	>P23193 Transcription elongation factor A protein 1 OS=Homo sapiens OX=9606 GN=TCEA1 PE=1 SV=2;>Q15560 Transcription elongation factor A protein 2 OS=Homo sapiens OX=9606 GN=TCEA2 PE=1 SV=1	2	4	4	4	3	2	0	2	2	2	3	2	0	2	2	2	3	2	0	2	2	2	15.6	15.6	15.6	33.969	301	301;299	1.42	7	5			0	6.6541	By MS/MS	By MS/MS	By matching	By MS/MS	By MS/MS	By MS/MS	11.6
P23229	P23229	2	2	2	Integrin alpha-6;Integrin alpha-6 heavy chain;Integrin alpha-6 light chain;Processed integrin alpha-6	ITGA6	>P23229 Integrin alpha-6 OS=Homo sapiens OX=9606 GN=ITGA6 PE=1 SV=5	1	2	2	2	1	1	2	0	1	1	1	1	2	0	1	1	1	1	2	0	1	1	1.7	1.7	1.7	126.6	1130	1130	3.67		1		5	0.0048387	1.6621	By MS/MS	By matching	By MS/MS	By matching	By matching	By matching	0.7
P23246	P23246	7	7	7	Splicing factor, proline- and glutamine-rich	SFPQ	>P23246 Splicing factor, proline- and glutamine-rich OS=Homo sapiens OX=9606 GN=SFPQ PE=1 SV=2	1	7	7	7	6	3	3	3	6	5	6	3	3	3	6	5	6	3	3	3	6	5	14.6	14.6	14.6	76.149	707	707	2.26	7	14	12	2	0	41.098	By MS/MS	By MS/MS	By MS/MS	By MS/MS	By MS/MS	By MS/MS	12.7
P23284	P23284	10	10	10	Peptidyl-prolyl cis-trans isomerase B	PPIB	>P23284 Peptidyl-prolyl cis-trans isomerase B OS=Homo sapiens OX=9606 GN=PPIB PE=1 SV=2	1	10	10	10	9	8	9	10	10	10	9	8	9	10	10	10	9	8	9	10	10	10	47.7	47.7	47.7	23.742	216	216	2.6	22	6	37	17	0	119.2	By MS/MS	By MS/MS	By MS/MS	By MS/MS	By MS/MS	By MS/MS	44
P23368;Q16798	P23368;Q16798	2;1	2;1	2;1	NAD-dependent malic enzyme, mitochondrial;NADP-dependent malic enzyme, mitochondrial	ME2;ME3	>P23368 NAD-dependent malic enzyme, mitochondrial OS=Homo sapiens OX=9606 GN=ME2 PE=1 SV=1;>Q16798 NADP-dependent malic enzyme, mitochondrial OS=Homo sapiens OX=9606 GN=ME3 PE=2 SV=2	2	2	2	2	1	2	0	2	2	1	1	2	0	2	2	1	1	2	0	2	2	1	3.1	3.1	3.1	65.443	584	584;604	1.75	5		3		0	3.0319	By MS/MS	By MS/MS	By matching	By MS/MS	By MS/MS	By MS/MS	1.5
P23381	P23381	7	7	7	Tryptophan--tRNA ligase, cytoplasmic;T1-TrpRS;T2-TrpRS	WARS	>P23381 Tryptophan--tRNA ligase, cytoplasmic OS=Homo sapiens OX=9606 GN=WARS PE=1 SV=2	1	7	7	7	6	5	5	4	6	6	6	5	5	4	6	6	6	5	5	4	6	6	18.9	18.9	18.9	53.165	471	471	2.5	9	4	22	3	0	34.042	By MS/MS	By MS/MS	By MS/MS	By MS/MS	By MS/MS	By MS/MS	16.1
P23396	P23396	11	11	11	40S ribosomal protein S3	RPS3	>P23396 40S ribosomal protein S3 OS=Homo sapiens OX=9606 GN=RPS3 PE=1 SV=2	1	11	11	11	10	10	7	9	11	9	10	10	7	9	11	9	10	10	7	9	11	9	48.1	48.1	48.1	26.688	243	243	2.72	12	5	28	13	0	31.536	By MS/MS	By MS/MS	By MS/MS	By MS/MS	By MS/MS	By MS/MS	44.9
P23526	P23526	13	13	13	Adenosylhomocysteinase	AHCY	>P23526 Adenosylhomocysteinase OS=Homo sapiens OX=9606 GN=AHCY PE=1 SV=4	1	13	13	13	12	12	12	12	12	12	12	12	12	12	12	12	12	12	12	12	12	12	31	31	31	47.716	432	432	2.74	8	36	33	25	0	142.82	By MS/MS	By MS/MS	By MS/MS	By MS/MS	By MS/MS	By MS/MS	28.9
P23528	P23528	12	12	9	Cofilin-1	CFL1	>P23528 Cofilin-1 OS=Homo sapiens OX=9606 GN=CFL1 PE=1 SV=3	1	12	12	9	10	9	10	12	11	11	10	9	10	12	11	11	7	7	8	9	8	8	68.7	68.7	47.6	18.502	166	166	2.36	25	17	30	13	0	181.87	By MS/MS	By MS/MS	By MS/MS	By MS/MS	By MS/MS	By MS/MS	67.5
P24043	P24043	37	37	36	Laminin subunit alpha-2	LAMA2	>P24043 Laminin subunit alpha-2 OS=Homo sapiens OX=9606 GN=LAMA2 PE=1 SV=4	1	37	37	36	2	2	3	17	35	29	2	2	3	17	35	29	2	1	3	17	34	28	15.4	15.4	15.1	343.9	3122	3122	3.02	15	17	29	49	0	271.78	By MS/MS	By matching	By MS/MS	By MS/MS	By MS/MS	By MS/MS	0.8
P24534	P24534	5	4	4	Elongation factor 1-beta	EEF1B2	>P24534 Elongation factor 1-beta OS=Homo sapiens OX=9606 GN=EEF1B2 PE=1 SV=3	1	5	4	4	4	4	4	4	5	5	3	3	3	3	4	4	3	3	3	3	4	4	29.3	24.4	24.4	24.763	225	225	3.38			15	9	0	97.987	By MS/MS	By MS/MS	By MS/MS	By MS/MS	By MS/MS	By MS/MS	25.3
P24592	P24592	3	3	3	Insulin-like growth factor-binding protein 6	IGFBP6	>P24592 Insulin-like growth factor-binding protein 6 OS=Homo sapiens OX=9606 GN=IGFBP6 PE=1 SV=1	1	3	3	3	3	2	3	3	2	2	3	2	3	3	2	2	3	2	3	3	2	2	15.8	15.8	15.8	25.322	240	240	2.95	3	6		11	0	275.12	By MS/MS	By MS/MS	By MS/MS	By MS/MS	By MS/MS	By MS/MS	15.8
P24593	P24593	11	11	11	Insulin-like growth factor-binding protein 5	IGFBP5	>P24593 Insulin-like growth factor-binding protein 5 OS=Homo sapiens OX=9606 GN=IGFBP5 PE=1 SV=1	1	11	11	11	11	7	5	9	11	9	11	7	5	9	11	9	11	7	5	9	11	9	54.4	54.4	54.4	30.57	272	272	2.62	12	29	45	15	0	219.5	By MS/MS	By MS/MS	By MS/MS	By MS/MS	By MS/MS	By MS/MS	54.4
P24666	P24666	3	3	3	Low molecular weight phosphotyrosine protein phosphatase	ACP1	>P24666 Low molecular weight phosphotyrosine protein phosphatase OS=Homo sapiens OX=9606 GN=ACP1 PE=1 SV=3	1	3	3	3	3	2	2	3	2	1	3	2	2	3	2	1	3	2	2	3	2	1	19	19	19	18.042	158	158	3.12			14	2	0	4.7867	By MS/MS	By matching	By MS/MS	By MS/MS	By MS/MS	By MS/MS	19
P24752	P24752	2	2	2	Acetyl-CoA acetyltransferase, mitochondrial	ACAT1	>P24752 Acetyl-CoA acetyltransferase, mitochondrial OS=Homo sapiens OX=9606 GN=ACAT1 PE=1 SV=1	1	2	2	2	2	2	1	2	2	2	2	2	1	2	2	2	2	2	1	2	2	2	3.7	3.7	3.7	45.199	427	427	1.5	6	6			0.0018138	2.3308	By MS/MS	By MS/MS	By matching	By MS/MS	By MS/MS	By MS/MS	3.7
P24821	P24821	22	22	22	Tenascin	TNC	>P24821 Tenascin OS=Homo sapiens OX=9606 GN=TNC PE=1 SV=3	1	22	22	22	3	2	1	4	4	22	3	2	1	4	4	22	3	2	1	4	4	22	15	15	15	240.85	2201	2201	2.89		17	7	13	0	92.896	By MS/MS	By MS/MS	By matching	By MS/MS	By MS/MS	By MS/MS	2.9
P24844	P24844	8	2	2	Myosin regulatory light polypeptide 9	MYL9	>P24844 Myosin regulatory light polypeptide 9 OS=Homo sapiens OX=9606 GN=MYL9 PE=1 SV=4	1	8	2	2	7	6	5	7	8	4	1	2	1	2	2	0	1	2	1	2	2	0	56.4	18	18	19.827	172	172	1.75	5		3		0	9.1428	By MS/MS	By MS/MS	By matching	By MS/MS	By MS/MS	By matching	44.8
P25391	P25391	10	9	9	Laminin subunit alpha-1	LAMA1	>P25391 Laminin subunit alpha-1 OS=Homo sapiens OX=9606 GN=LAMA1 PE=1 SV=2	1	10	9	9	0	1	0	1	2	10	0	0	0	1	1	9	0	0	0	1	1	9	4	3.7	3.7	337.08	3075	3075	2.91	2	1	4	4	0	17.403	By matching	By matching	By matching	By matching	By MS/MS	By MS/MS	0
P25398	P25398	5	5	5	40S ribosomal protein S12	RPS12	>P25398 40S ribosomal protein S12 OS=Homo sapiens OX=9606 GN=RPS12 PE=1 SV=3	1	5	5	5	5	5	5	5	5	4	5	5	5	5	5	4	5	5	5	5	5	4	48.5	48.5	48.5	14.515	132	132	3.37	3	6	5	27	0	130.03	By MS/MS	By MS/MS	By MS/MS	By MS/MS	By MS/MS	By MS/MS	48.5
P25705	P25705	9	9	9	ATP synthase subunit alpha, mitochondrial	ATP5A1	>P25705 ATP synthase subunit alpha, mitochondrial OS=Homo sapiens OX=9606 GN=ATP5F1A PE=1 SV=1	1	9	9	9	6	7	4	7	9	6	6	7	4	7	9	6	6	7	4	7	9	6	17.9	17.9	17.9	59.75	553	553	2.92	5	5	18	12	0	22.164	By MS/MS	By MS/MS	By MS/MS	By MS/MS	By MS/MS	By MS/MS	13.4
P25786	P25786	7	7	7	Proteasome subunit alpha type-1	PSMA1	>P25786 Proteasome subunit alpha type-1 OS=Homo sapiens OX=9606 GN=PSMA1 PE=1 SV=1	1	7	7	7	5	6	4	5	5	4	5	6	4	5	5	4	5	6	4	5	5	4	29.3	29.3	29.3	29.555	263	263	2.23	16	6	2	11	0	20.586	By MS/MS	By MS/MS	By MS/MS	By MS/MS	By MS/MS	By MS/MS	17.9
P25787	P25787	3	3	3	Proteasome subunit alpha type-2	PSMA2	>P25787 Proteasome subunit alpha type-2 OS=Homo sapiens OX=9606 GN=PSMA2 PE=1 SV=2	1	3	3	3	3	3	1	3	3	2	3	3	1	3	3	2	3	3	1	3	3	2	18.8	18.8	18.8	25.898	234	234	2.93	6	7		17	0	43.743	By MS/MS	By MS/MS	By MS/MS	By MS/MS	By MS/MS	By MS/MS	18.8
P25788	P25788	8	8	8	Proteasome subunit alpha type-3	PSMA3	>P25788 Proteasome subunit alpha type-3 OS=Homo sapiens OX=9606 GN=PSMA3 PE=1 SV=2	1	8	8	8	6	7	5	7	8	6	6	7	5	7	8	6	6	7	5	7	8	6	30.2	30.2	30.2	28.433	255	255	2.21	16	12	12	7	0	14.463	By MS/MS	By MS/MS	By MS/MS	By MS/MS	By MS/MS	By MS/MS	24.7
P25789	P25789	8	8	8	Proteasome subunit alpha type-4	PSMA4	>P25789 Proteasome subunit alpha type-4 OS=Homo sapiens OX=9606 GN=PSMA4 PE=1 SV=1	1	8	8	8	7	7	6	8	6	7	7	7	6	8	6	7	7	7	6	8	6	7	40.2	40.2	40.2	29.483	261	261	2.74	5	11	26	8	0	115.39	By MS/MS	By MS/MS	By MS/MS	By MS/MS	By MS/MS	By MS/MS	31.8
P26022	P26022	19	19	19	Pentraxin-related protein PTX3	PTX3	>P26022 Pentraxin-related protein PTX3 OS=Homo sapiens OX=9606 GN=PTX3 PE=1 SV=3	1	19	19	19	1	11	0	18	15	18	1	11	0	18	15	18	1	11	0	18	15	18	57.2	57.2	57.2	41.975	381	381	2.67	43	13	30	53	0	302.54	By matching	By MS/MS	By matching	By MS/MS	By MS/MS	By MS/MS	2.9
P26038	P26038	24	24	15	Moesin	MSN	>P26038 Moesin OS=Homo sapiens OX=9606 GN=MSN PE=1 SV=3	1	24	24	15	22	21	16	22	21	19	22	21	16	22	21	19	13	12	8	14	12	12	39.7	39.7	27.7	67.819	577	577	2.28	37	64	43	20	0	237.7	By MS/MS	By MS/MS	By MS/MS	By MS/MS	By MS/MS	By MS/MS	37.1
P26368	P26368	2	2	2	Splicing factor U2AF 65 kDa subunit	U2AF2	>P26368 Splicing factor U2AF 65 kDa subunit OS=Homo sapiens OX=9606 GN=U2AF2 PE=1 SV=4	1	2	2	2	2	2	2	2	2	2	2	2	2	2	2	2	2	2	2	2	2	2	3.8	3.8	3.8	53.5	475	475	4				12	0.0012369	2.467	By MS/MS	By MS/MS	By MS/MS	By MS/MS	By MS/MS	By MS/MS	3.8
P26373	P26373	2	2	2	60S ribosomal protein L13	RPL13	>P26373 60S ribosomal protein L13 OS=Homo sapiens OX=9606 GN=RPL13 PE=1 SV=4	1	2	2	2	2	0	0	0	1	0	2	0	0	0	1	0	2	0	0	0	1	0	11.4	11.4	11.4	24.261	211	211	4				3	0	3.6641	By MS/MS	By matching	By matching	By matching	By matching	By matching	11.4
P26447	P26447	4	4	4	Protein S100-A4	S100A4	>P26447 Protein S100-A4 OS=Homo sapiens OX=9606 GN=S100A4 PE=1 SV=1	1	4	4	4	4	3	4	2	2	2	4	3	4	2	2	2	4	3	4	2	2	2	35.6	35.6	35.6	11.728	101	101	3.14	5	2	12	17	0	7.7686	By MS/MS	By MS/MS	By MS/MS	By MS/MS	By MS/MS	By MS/MS	35.6
P26572	P26572	2	2	2	Alpha-1,3-mannosyl-glycoprotein 2-beta-N-acetylglucosaminyltransferase	MGAT1	>P26572 Alpha-1,3-mannosyl-glycoprotein 2-beta-N-acetylglucosaminyltransferase OS=Homo sapiens OX=9606 GN=MGAT1 PE=1 SV=2	1	2	2	2	2	1	2	1	1	1	2	1	2	1	1	1	2	1	2	1	1	1	4.9	4.9	4.9	50.878	445	445	3			8		0	3.0407	By MS/MS	By matching	By MS/MS	By matching	By matching	By matching	4.9
P26599;O95758	P26599	9;2	9;2	9;2	Polypyrimidine tract-binding protein 1	PTBP1	>P26599 Polypyrimidine tract-binding protein 1 OS=Homo sapiens OX=9606 GN=PTBP1 PE=1 SV=1	2	9	9	9	9	7	3	5	7	6	9	7	3	5	7	6	9	7	3	5	7	6	25.2	25.2	25.2	57.221	531	531;552	3.08	7	4	5	21	0	48.759	By MS/MS	By MS/MS	By matching	By MS/MS	By MS/MS	By MS/MS	25.2
P26639	P26639	10	10	10	Threonine--tRNA ligase, cytoplasmic	TARS	>P26639 Threonine--tRNA ligase, cytoplasmic OS=Homo sapiens OX=9606 GN=TARS PE=1 SV=3	1	10	10	10	9	5	4	8	8	5	9	5	4	8	8	5	9	5	4	8	8	5	17.6	17.6	17.6	83.434	723	723	3.45		3	16	21	0	25.726	By MS/MS	By MS/MS	By MS/MS	By MS/MS	By MS/MS	By MS/MS	15.9
P26640	P26640	5	5	5	Valine--tRNA ligase	VARS	>P26640 Valine--tRNA ligase OS=Homo sapiens OX=9606 GN=VARS PE=1 SV=4	1	5	5	5	5	4	4	3	5	4	5	4	4	3	5	4	5	4	4	3	5	4	4.8	4.8	4.8	140.47	1264	1264	3.88			3	22	0	17.651	By MS/MS	By MS/MS	By MS/MS	By MS/MS	By MS/MS	By MS/MS	4.8
P26641	P26641	12	12	12	Elongation factor 1-gamma	EEF1G	>P26641 Elongation factor 1-gamma OS=Homo sapiens OX=9606 GN=EEF1G PE=1 SV=3	1	12	12	12	12	12	9	10	12	11	12	12	9	10	12	11	12	12	9	10	12	11	27.2	27.2	27.2	50.118	437	437	2.72	12	20	38	19	0	53.091	By MS/MS	By MS/MS	By MS/MS	By MS/MS	By MS/MS	By MS/MS	27.2
P26885	P26885	5	5	5	Peptidyl-prolyl cis-trans isomerase FKBP2	FKBP2	>P26885 Peptidyl-prolyl cis-trans isomerase FKBP2 OS=Homo sapiens OX=9606 GN=FKBP2 PE=1 SV=2	1	5	5	5	4	5	4	3	2	3	4	5	4	3	2	3	4	5	4	3	2	3	37.3	37.3	37.3	15.649	142	142	3.08			22	2	0	15.809	By MS/MS	By MS/MS	By MS/MS	By MS/MS	By MS/MS	By MS/MS	26.8
P27105	P27105	2	2	2	Erythrocyte band 7 integral membrane protein	STOM	>P27105 Erythrocyte band 7 integral membrane protein OS=Homo sapiens OX=9606 GN=STOM PE=1 SV=3	1	2	2	2	0	1	0	1	2	1	0	1	0	1	2	1	0	1	0	1	2	1	6.9	6.9	6.9	31.73	288	288	4				5	0	3.056	By matching	By MS/MS	By matching	By MS/MS	By MS/MS	By MS/MS	0
P27348	P27348	13	8	8	14-3-3 protein theta	YWHAQ	>P27348 14-3-3 protein theta OS=Homo sapiens OX=9606 GN=YWHAQ PE=1 SV=1	1	13	8	8	11	12	12	11	13	11	8	8	7	8	8	7	8	8	7	8	8	7	56.3	42	42	27.764	245	245	1.94	28	21	8	8	0	163.74	By MS/MS	By MS/MS	By MS/MS	By MS/MS	By MS/MS	By MS/MS	50.2
P27361	P27361	6	4	4	Mitogen-activated protein kinase 3	MAPK3	>P27361 Mitogen-activated protein kinase 3 OS=Homo sapiens OX=9606 GN=MAPK3 PE=1 SV=4	1	6	4	4	6	6	4	3	3	2	4	4	2	1	1	1	4	4	2	1	1	1	18.5	11.3	11.3	43.135	379	379	2.15		11	2		0	10.767	By MS/MS	By MS/MS	By MS/MS	By matching	By matching	By MS/MS	18.5
P27487	P27487	4	4	4	Dipeptidyl peptidase 4;Dipeptidyl peptidase 4 membrane form;Dipeptidyl peptidase 4 soluble form	DPP4	>P27487 Dipeptidyl peptidase 4 OS=Homo sapiens OX=9606 GN=DPP4 PE=1 SV=2	1	4	4	4	0	0	0	1	4	0	0	0	0	1	4	0	0	0	0	1	4	0	6.9	6.9	6.9	88.278	766	766	2.6		3	1	1	0	8.2205	By matching	By matching	By matching	By matching	By MS/MS	By matching	0
P27635	P27635	2	2	2	60S ribosomal protein L10	RPL10	>P27635 60S ribosomal protein L10 OS=Homo sapiens OX=9606 GN=RPL10 PE=1 SV=4	1	2	2	2	2	0	0	1	1	0	2	0	0	1	1	0	2	0	0	1	1	0	9.8	9.8	9.8	24.604	214	214	2		4			0.0012315	2.4383	By MS/MS	By matching	By matching	By MS/MS	By matching	By matching	9.8
P27658	P27658	9	9	9	Collagen alpha-1(VIII) chain;Vastatin	COL8A1	>P27658 Collagen alpha-1(VIII) chain OS=Homo sapiens OX=9606 GN=COL8A1 PE=1 SV=2	1	9	9	9	0	0	0	9	1	2	0	0	0	9	1	2	0	0	0	9	1	2	16	16	16	73.363	744	744	3.43	1	1	3	9	0	54.004	By matching	By matching	By matching	By MS/MS	By matching	By matching	0
P27701	P27701	2	2	2	CD82 antigen	CD82	>P27701 CD82 antigen OS=Homo sapiens OX=9606 GN=CD82 PE=1 SV=1	1	2	2	2	0	0	0	0	2	0	0	0	0	0	2	0	0	0	0	0	2	0	10.5	10.5	10.5	29.625	267	267	3			2		0	3.0689	By matching	By matching	By matching	By matching	By MS/MS	By matching	0
P27708	P27708	2	2	2	CAD protein;Glutamine-dependent carbamoyl-phosphate synthase;Aspartate carbamoyltransferase;Dihydroorotase	CAD	>P27708 CAD protein OS=Homo sapiens OX=9606 GN=CAD PE=1 SV=3	1	2	2	2	2	2	1	2	2	1	2	2	1	2	2	1	2	2	1	2	2	1	1.1	1.1	1.1	242.98	2225	2225	3.4			6	4	0	2.8534	By MS/MS	By matching	By MS/MS	By MS/MS	By MS/MS	By matching	1.1
P27797	P27797	13	13	13	Calreticulin	CALR	>P27797 Calreticulin OS=Homo sapiens OX=9606 GN=CALR PE=1 SV=1	1	13	13	13	9	10	5	10	12	11	9	10	5	10	12	11	9	10	5	10	12	11	35.7	35.7	35.7	48.141	417	417	2.27	46	40	10	36	0	315.8	By MS/MS	By MS/MS	By MS/MS	By MS/MS	By MS/MS	By MS/MS	33.6
P27816	P27816	14	14	14	Microtubule-associated protein 4	MAP4	>P27816 Microtubule-associated protein 4 OS=Homo sapiens OX=9606 GN=MAP4 PE=1 SV=3	1	14	14	14	13	7	1	6	9	4	13	7	1	6	9	4	13	7	1	6	9	4	17.6	17.6	17.6	121	1152	1152	2.24	5	25	14	1	0	38.075	By MS/MS	By MS/MS	By matching	By MS/MS	By MS/MS	By MS/MS	16.4
P27824	P27824	3	3	3	Calnexin	CANX	>P27824 Calnexin OS=Homo sapiens OX=9606 GN=CANX PE=1 SV=2	1	3	3	3	2	1	2	2	2	1	2	1	2	2	2	1	2	1	2	2	2	1	7.9	7.9	7.9	67.567	592	592	2.3	3	1	6		0	9.1523	By MS/MS	By matching	By MS/MS	By MS/MS	By MS/MS	By matching	4.7
P28066	P28066	7	7	7	Proteasome subunit alpha type-5	PSMA5	>P28066 Proteasome subunit alpha type-5 OS=Homo sapiens OX=9606 GN=PSMA5 PE=1 SV=3	1	7	7	7	7	7	6	7	6	6	7	7	6	7	6	6	7	7	6	7	6	6	29.5	29.5	29.5	26.411	241	241	2.52	13	6	11	12	0	21.378	By MS/MS	By MS/MS	By MS/MS	By MS/MS	By MS/MS	By MS/MS	29.5
P28070	P28070	6	6	6	Proteasome subunit beta type-4	PSMB4	>P28070 Proteasome subunit beta type-4 OS=Homo sapiens OX=9606 GN=PSMB4 PE=1 SV=4	1	6	6	6	4	5	3	4	6	3	4	5	3	4	6	3	4	5	3	4	6	3	31.1	31.1	31.1	29.204	264	264	3	5		11	10	0	27.088	By MS/MS	By MS/MS	By MS/MS	By MS/MS	By MS/MS	By MS/MS	15.9
P28072	P28072	3	3	3	Proteasome subunit beta type-6	PSMB6	>P28072 Proteasome subunit beta type-6 OS=Homo sapiens OX=9606 GN=PSMB6 PE=1 SV=4	1	3	3	3	3	2	2	2	2	2	3	2	2	2	2	2	3	2	2	2	2	2	13	13	13	25.357	239	239	2.5		7	7		0	8.82	By MS/MS	By MS/MS	By MS/MS	By MS/MS	By MS/MS	By MS/MS	13
P28074	P28074	7	7	7	Proteasome subunit beta type-5	PSMB5	>P28074 Proteasome subunit beta type-5 OS=Homo sapiens OX=9606 GN=PSMB5 PE=1 SV=3	1	7	7	7	7	6	6	6	6	5	7	6	6	6	6	5	7	6	6	6	6	5	28.9	28.9	28.9	28.48	263	263	2.34	5	20	13	3	0	42.32	By MS/MS	By MS/MS	By MS/MS	By MS/MS	By MS/MS	By MS/MS	28.9
P28161	P28161	5	2	2	Glutathione S-transferase Mu 2	GSTM2	>P28161 Glutathione S-transferase Mu 2 OS=Homo sapiens OX=9606 GN=GSTM2 PE=1 SV=2	1	5	2	2	5	5	2	5	5	5	2	2	1	2	2	2	2	2	1	2	2	2	24.8	12.4	12.4	25.744	218	218	2.73	4	1		6	0.0048465	1.6704	By matching	By matching	By matching	By matching	By MS/MS	By MS/MS	24.8
P28300	P28300	11	11	11	Protein-lysine 6-oxidase	LOX	>P28300 Protein-lysine 6-oxidase OS=Homo sapiens OX=9606 GN=LOX PE=1 SV=2	1	11	11	11	0	5	0	9	11	10	0	5	0	9	11	10	0	5	0	9	11	10	29.3	29.3	29.3	46.944	417	417	2.45	4	22	12	6	0	129.78	By matching	By MS/MS	By matching	By MS/MS	By MS/MS	By MS/MS	0
P28482	P28482	8	8	6	Mitogen-activated protein kinase 1	MAPK1	>P28482 Mitogen-activated protein kinase 1 OS=Homo sapiens OX=9606 GN=MAPK1 PE=1 SV=3	1	8	8	6	6	6	5	8	7	7	6	6	5	8	7	7	4	4	3	6	5	6	26.4	26.4	18.9	41.389	360	360	2.49		24	14	3	0	47.418	By MS/MS	By MS/MS	By MS/MS	By MS/MS	By MS/MS	By MS/MS	18.6
P28799	P28799	11	11	11	Granulins;Acrogranin;Paragranulin;Granulin-1;Granulin-2;Granulin-3;Granulin-4;Granulin-5;Granulin-6;Granulin-7	GRN	>P28799 Granulins OS=Homo sapiens OX=9606 GN=GRN PE=1 SV=2	1	11	11	11	9	8	10	5	7	7	9	8	10	5	7	7	9	8	10	5	7	7	23.8	23.8	23.8	63.544	593	593	2.75	4	14	29	8	0	53.695	By MS/MS	By MS/MS	By MS/MS	By MS/MS	By MS/MS	By MS/MS	19.6
P28838	P28838	5	5	5	Cytosol aminopeptidase	LAP3	>P28838 Cytosol aminopeptidase OS=Homo sapiens OX=9606 GN=LAP3 PE=1 SV=3	1	5	5	5	5	4	4	4	3	3	5	4	4	4	3	3	5	4	4	4	3	3	12.3	12.3	12.3	56.166	519	519	3.77	2			24	0	19.597	By MS/MS	By MS/MS	By MS/MS	By MS/MS	By MS/MS	By MS/MS	12.3
P29120	P29120	5	5	5	Neuroendocrine convertase 1	PCSK1	>P29120 Neuroendocrine convertase 1 OS=Homo sapiens OX=9606 GN=PCSK1 PE=1 SV=2	1	5	5	5	2	4	2	4	3	1	2	4	2	4	3	1	2	4	2	4	3	1	10.2	10.2	10.2	84.151	753	753	2.88	1	2	12	2	0	17.391	By MS/MS	By MS/MS	By MS/MS	By MS/MS	By MS/MS	By MS/MS	3.5
P29279	P29279	16	16	16	Connective tissue growth factor	CTGF	>P29279 Connective tissue growth factor OS=Homo sapiens OX=9606 GN=CTGF PE=1 SV=2	1	16	16	16	2	9	0	16	7	7	2	9	0	16	7	7	2	9	0	16	7	7	47	47	47	38.091	349	349	1.93	19	9	16		0	52.131	By matching	By MS/MS	By matching	By MS/MS	By MS/MS	By MS/MS	6.3
P29400	P29400	4	2	2	Collagen alpha-5(IV) chain	COL4A5	>P29400 Collagen alpha-5(IV) chain OS=Homo sapiens OX=9606 GN=COL4A5 PE=1 SV=2	1	4	2	2	2	1	2	2	4	2	0	0	0	0	2	0	0	0	0	0	2	0	3.4	2	2	161.04	1685	1685	3		1		1	0	27.327	By matching	By matching	By matching	By matching	By MS/MS	By matching	1.4
P29401	P29401	13	13	13	Transketolase	TKT	>P29401 Transketolase OS=Homo sapiens OX=9606 GN=TKT PE=1 SV=3	1	13	13	13	11	10	11	13	12	11	11	10	11	13	12	11	11	10	11	13	12	11	24.2	24.2	24.2	67.877	623	623	2.71	7	35	16	25	0	114.66	By MS/MS	By MS/MS	By MS/MS	By MS/MS	By MS/MS	By MS/MS	23
P29692	P29692	11	11	10	Elongation factor 1-delta	EEF1D	>P29692 Elongation factor 1-delta OS=Homo sapiens OX=9606 GN=EEF1D PE=1 SV=5	1	11	11	10	11	6	5	9	9	5	11	6	5	9	9	5	10	5	4	8	8	4	47	47	47	31.121	281	281	2.79	5	14	21	13	0	135.93	By MS/MS	By MS/MS	By MS/MS	By MS/MS	By MS/MS	By MS/MS	47
P29762	P29762	5	5	4	Cellular retinoic acid-binding protein 1	CRABP1	>P29762 Cellular retinoic acid-binding protein 1 OS=Homo sapiens OX=9606 GN=CRABP1 PE=1 SV=2	1	5	5	4	5	4	4	5	5	5	5	4	4	5	5	5	4	3	3	4	4	4	38.7	38.7	33.6	15.565	137	137	1.83	12	11	7		0	19.18	By MS/MS	By MS/MS	By MS/MS	By MS/MS	By MS/MS	By MS/MS	38.7
P29966	P29966	3	3	3	Myristoylated alanine-rich C-kinase substrate	MARCKS	>P29966 Myristoylated alanine-rich C-kinase substrate OS=Homo sapiens OX=9606 GN=MARCKS PE=1 SV=4	1	3	3	3	1	0	0	2	3	1	1	0	0	2	3	1	1	0	0	2	3	1	15.7	15.7	15.7	31.554	332	332	1	9				0	23.235	By MS/MS	By matching	By matching	By MS/MS	By MS/MS	By MS/MS	5.7
P50148;P29992;O95837	P50148;P29992	3;3;1	3;3;1	3;3;1	Guanine nucleotide-binding protein G(q) subunit alpha;Guanine nucleotide-binding protein subunit alpha-11	GNAQ;GNA11	>P50148 Guanine nucleotide-binding protein G(q) subunit alpha OS=Homo sapiens OX=9606 GN=GNAQ PE=1 SV=4;>P29992 Guanine nucleotide-binding protein subunit alpha-11 OS=Homo sapiens OX=9606 GN=GNA11 PE=1 SV=2	3	3	3	3	2	3	2	3	2	2	2	3	2	3	2	2	2	3	2	3	2	2	10.6	10.6	10.6	42.142	359	359;359;355	3.71		2		12	0	7.6269	By MS/MS	By MS/MS	By MS/MS	By MS/MS	By MS/MS	By matching	7.5
P30040	P30040	5	5	5	Endoplasmic reticulum resident protein 29	ERP29	>P30040 Endoplasmic reticulum resident protein 29 OS=Homo sapiens OX=9606 GN=ERP29 PE=1 SV=4	1	5	5	5	5	5	5	5	5	5	5	5	5	5	5	5	5	5	5	5	5	5	19.2	19.2	19.2	28.993	261	261	1.98	7	33	6		0	34.677	By MS/MS	By MS/MS	By MS/MS	By MS/MS	By MS/MS	By MS/MS	19.2
P30041	P30041	13	13	13	Peroxiredoxin-6	PRDX6	>P30041 Peroxiredoxin-6 OS=Homo sapiens OX=9606 GN=PRDX6 PE=1 SV=3	1	13	13	13	12	12	10	11	13	12	12	12	10	11	13	12	12	12	10	11	13	12	66.1	66.1	66.1	25.035	224	224	2.93	8	34	17	43	0	132.37	By MS/MS	By MS/MS	By MS/MS	By MS/MS	By MS/MS	By MS/MS	58.5
P30043	P30043	2	2	2	Flavin reductase (NADPH)	BLVRB	>P30043 Flavin reductase (NADPH) OS=Homo sapiens OX=9606 GN=BLVRB PE=1 SV=3	1	2	2	2	2	1	1	1	1	1	2	1	1	1	1	1	2	1	1	1	1	1	14.1	14.1	14.1	22.119	206	206	3.05	2	7		12	0	6.9221	By MS/MS	By MS/MS	By MS/MS	By MS/MS	By MS/MS	By MS/MS	14.1
P30044	P30044	5	5	5	Peroxiredoxin-5, mitochondrial	PRDX5	>P30044 Peroxiredoxin-5, mitochondrial OS=Homo sapiens OX=9606 GN=PRDX5 PE=1 SV=4	1	5	5	5	5	4	4	4	5	3	5	4	4	4	5	3	5	4	4	4	5	3	31.8	31.8	31.8	22.086	214	214	3	7	4	3	18	0	33.43	By MS/MS	By MS/MS	By MS/MS	By MS/MS	By MS/MS	By MS/MS	31.8
P30048	P30048	8	8	8	Thioredoxin-dependent peroxide reductase, mitochondrial	PRDX3	>P30048 Thioredoxin-dependent peroxide reductase, mitochondrial OS=Homo sapiens OX=9606 GN=PRDX3 PE=1 SV=3	1	8	8	8	4	5	2	5	8	6	4	5	2	5	8	6	4	5	2	5	8	6	43	43	43	27.692	256	256	2.21	17	5	7	9	0	24.386	By MS/MS	By MS/MS	By MS/MS	By MS/MS	By MS/MS	By MS/MS	18.4
P30049	P30049	3	3	3	ATP synthase subunit delta, mitochondrial	ATP5D	>P30049 ATP synthase subunit delta, mitochondrial OS=Homo sapiens OX=9606 GN=ATP5F1D PE=1 SV=2	1	3	3	3	2	0	2	2	3	1	2	0	2	2	3	1	2	0	2	2	3	1	22.6	22.6	22.6	17.49	168	168	1.54	6	7			0	34.432	By MS/MS	By matching	By MS/MS	By MS/MS	By MS/MS	By matching	14.3
P30050	P30050	6	6	6	60S ribosomal protein L12	RPL12	>P30050 60S ribosomal protein L12 OS=Homo sapiens OX=9606 GN=RPL12 PE=1 SV=1	1	6	6	6	6	6	5	5	6	5	6	6	5	5	6	5	6	6	5	5	6	5	54.5	54.5	54.5	17.818	165	165	3.3		11	6	23	0	90.433	By MS/MS	By MS/MS	By MS/MS	By MS/MS	By MS/MS	By MS/MS	54.5
P30084	P30084	2	2	2	Enoyl-CoA hydratase, mitochondrial	ECHS1	>P30084 Enoyl-CoA hydratase, mitochondrial OS=Homo sapiens OX=9606 GN=ECHS1 PE=1 SV=4	1	2	2	2	0	1	0	1	2	2	0	1	0	1	2	2	0	1	0	1	2	2	10	10	10	31.387	290	290	3			6		0	3.8185	By matching	By matching	By matching	By matching	By MS/MS	By MS/MS	0
P30085	P30085	8	8	8	UMP-CMP kinase	CMPK1	>P30085 UMP-CMP kinase OS=Homo sapiens OX=9606 GN=CMPK1 PE=1 SV=3	1	8	8	8	8	8	7	8	8	8	8	8	7	8	8	8	8	8	7	8	8	8	38.8	38.8	38.8	22.222	196	196	2.39	24	6	11	18	0	36.66	By MS/MS	By MS/MS	By MS/MS	By MS/MS	By MS/MS	By MS/MS	38.8
P30086	P30086	8	8	8	Phosphatidylethanolamine-binding protein 1;Hippocampal cholinergic neurostimulating peptide	PEBP1	>P30086 Phosphatidylethanolamine-binding protein 1 OS=Homo sapiens OX=9606 GN=PEBP1 PE=1 SV=3	1	8	8	8	8	6	5	6	7	4	8	6	5	6	7	4	8	6	5	6	7	4	64.2	64.2	64.2	21.057	187	187	2.77	15		29	16	0	90.204	By MS/MS	By MS/MS	By MS/MS	By MS/MS	By MS/MS	By MS/MS	64.2
P30101	P30101	22	22	22	Protein disulfide-isomerase A3	PDIA3	>P30101 Protein disulfide-isomerase A3 OS=Homo sapiens OX=9606 GN=PDIA3 PE=1 SV=4	1	22	22	22	15	19	14	19	21	19	15	19	14	19	21	19	15	19	14	19	21	19	52.9	52.9	52.9	56.782	505	505	2.43	45	44	45	37	0	323.31	By MS/MS	By MS/MS	By MS/MS	By MS/MS	By MS/MS	By MS/MS	35.6
P30153;P30154	P30153	6;1	6;1	6;1	Serine/threonine-protein phosphatase 2A 65 kDa regulatory subunit A alpha isoform	PPP2R1A	>P30153 Serine/threonine-protein phosphatase 2A 65 kDa regulatory subunit A alpha isoform OS=Homo sapiens OX=9606 GN=PPP2R1A PE=1 SV=4	2	6	6	6	4	6	3	3	5	3	4	6	3	3	5	3	4	6	3	3	5	3	13.2	13.2	13.2	65.308	589	589;601	2.9	11			19	0	42.18	By MS/MS	By MS/MS	By MS/MS	By MS/MS	By MS/MS	By MS/MS	8
P30626	P30626	4	4	4	Sorcin	SRI	>P30626 Sorcin OS=Homo sapiens OX=9606 GN=SRI PE=1 SV=1	1	4	4	4	2	2	3	3	2	2	2	2	3	3	2	2	2	2	3	3	2	2	19.2	19.2	19.2	21.676	198	198	3.36	1		6	7	0	5.1204	By MS/MS	By MS/MS	By MS/MS	By MS/MS	By MS/MS	By MS/MS	9.6
P31146	P31146	2	2	2	Coronin-1A	CORO1A	>P31146 Coronin-1A OS=Homo sapiens OX=9606 GN=CORO1A PE=1 SV=4	1	2	2	2	0	1	0	1	0	0	0	1	0	1	0	0	0	1	0	1	0	0	3.9	3.9	3.9	51.026	461	461	3			2		0.0073996	1.5756	By matching	By MS/MS	By matching	By MS/MS	By matching	By matching	0
P31150	P31150	18	13	13	Rab GDP dissociation inhibitor alpha	GDI1	>P31150 Rab GDP dissociation inhibitor alpha OS=Homo sapiens OX=9606 GN=GDI1 PE=1 SV=2	1	18	13	13	14	14	14	16	18	15	9	9	9	11	13	10	9	9	9	11	13	10	49.4	37.1	37.1	50.582	447	447	2.6	21	30	17	32	0	219.11	By MS/MS	By MS/MS	By MS/MS	By MS/MS	By MS/MS	By MS/MS	40.5
P31153;Q00266	P31153	5;1	5;1	5;1	S-adenosylmethionine synthase isoform type-2	MAT2A	>P31153 S-adenosylmethionine synthase isoform type-2 OS=Homo sapiens OX=9606 GN=MAT2A PE=1 SV=1	2	5	5	5	3	4	3	3	3	1	3	4	3	3	3	1	3	4	3	3	3	1	14.9	14.9	14.9	43.66	395	395;395	2.81		9	7	5	0	10.842	By MS/MS	By MS/MS	By MS/MS	By MS/MS	By MS/MS	By MS/MS	8.4
P31323	P31323	3	3	2	cAMP-dependent protein kinase type II-beta regulatory subunit	PRKAR2B	>P31323 cAMP-dependent protein kinase type II-beta regulatory subunit OS=Homo sapiens OX=9606 GN=PRKAR2B PE=1 SV=3	1	3	3	2	3	1	2	2	3	1	3	1	2	2	3	1	2	1	1	2	2	1	9.6	9.6	6	46.302	418	418	3.5			6	6	0	9.6172	By MS/MS	By matching	By MS/MS	By MS/MS	By MS/MS	By matching	9.6
P31431	P31431	3	3	3	Syndecan-4	SDC4	>P31431 Syndecan-4 OS=Homo sapiens OX=9606 GN=SDC4 PE=1 SV=2	1	3	3	3	3	0	3	2	3	3	3	0	3	2	3	3	3	0	3	2	3	3	19.7	19.7	19.7	21.641	198	198	1.36	9	5			0	10.56	By MS/MS	By matching	By MS/MS	By MS/MS	By MS/MS	By MS/MS	19.7
P31937	P31937	3	3	3	3-hydroxyisobutyrate dehydrogenase, mitochondrial	HIBADH	>P31937 3-hydroxyisobutyrate dehydrogenase, mitochondrial OS=Homo sapiens OX=9606 GN=HIBADH PE=1 SV=2	1	3	3	3	2	3	2	3	2	2	2	3	2	3	2	2	2	3	2	3	2	2	11.6	11.6	11.6	35.329	336	336	3.25	4			12	0	7.6358	By MS/MS	By MS/MS	By MS/MS	By MS/MS	By MS/MS	By MS/MS	7.7
P31939	P31939	10	10	10	Bifunctional purine biosynthesis protein PURH;Phosphoribosylaminoimidazolecarboxamide formyltransferase;IMP cyclohydrolase	ATIC	>P31939 Bifunctional purine biosynthesis protein PURH OS=Homo sapiens OX=9606 GN=ATIC PE=1 SV=3	1	10	10	10	7	9	8	6	8	6	7	9	8	6	8	6	7	9	8	6	8	6	20.8	20.8	20.8	64.615	592	592	3.38		2	25	20	0	36.992	By MS/MS	By MS/MS	By MS/MS	By MS/MS	By MS/MS	By MS/MS	15.7
P31943;P55795	P31943;P55795	5;3	5;3	4;2	Heterogeneous nuclear ribonucleoprotein H;Heterogeneous nuclear ribonucleoprotein H, N-terminally processed;Heterogeneous nuclear ribonucleoprotein H2;Heterogeneous nuclear ribonucleoprotein H2, N-terminally processed	HNRNPH1;HNRNPH2	>P31943 Heterogeneous nuclear ribonucleoprotein H OS=Homo sapiens OX=9606 GN=HNRNPH1 PE=1 SV=4;>P55795 Heterogeneous nuclear ribonucleoprotein H2 OS=Homo sapiens OX=9606 GN=HNRNPH2 PE=1 SV=1	2	5	5	4	5	4	2	3	4	3	5	4	2	3	4	3	4	3	2	2	3	2	17.4	17.4	15.1	49.229	449	449;449	2.25	3	12	9		0	78.078	By MS/MS	By MS/MS	By MS/MS	By MS/MS	By MS/MS	By MS/MS	17.4
P31946	P31946	10	5	4	14-3-3 protein beta/alpha;14-3-3 protein beta/alpha, N-terminally processed	YWHAB	>P31946 14-3-3 protein beta/alpha OS=Homo sapiens OX=9606 GN=YWHAB PE=1 SV=3	1	10	5	4	8	9	9	8	9	8	5	5	4	5	4	4	4	4	3	4	3	3	43.5	29.3	25.6	28.082	246	246	1.88	20	15	14		0	73.762	By MS/MS	By MS/MS	By MS/MS	By MS/MS	By MS/MS	By MS/MS	37.4
P31947	P31947	9	6	6	14-3-3 protein sigma	SFN	>P31947 14-3-3 protein sigma OS=Homo sapiens OX=9606 GN=SFN PE=1 SV=1	1	9	6	6	7	8	9	5	7	4	6	5	6	4	4	2	6	5	6	4	4	2	37.1	27	27	27.774	248	248	2.2	8	20	17		0	127.26	By MS/MS	By MS/MS	By MS/MS	By MS/MS	By MS/MS	By MS/MS	31
P31948	P31948	17	17	17	Stress-induced-phosphoprotein 1	STIP1	>P31948 Stress-induced-phosphoprotein 1 OS=Homo sapiens OX=9606 GN=STIP1 PE=1 SV=1	1	17	17	17	16	15	14	15	17	14	16	15	14	15	17	14	16	15	14	15	17	14	33.9	33.9	33.9	62.639	543	543	2.01	37	41	24	7	0	72.123	By MS/MS	By MS/MS	By MS/MS	By MS/MS	By MS/MS	By MS/MS	30.4
P31949	P31949	4	4	4	Protein S100-A11;Protein S100-A11, N-terminally processed	S100A11	>P31949 Protein S100-A11 OS=Homo sapiens OX=9606 GN=S100A11 PE=1 SV=2	1	4	4	4	4	3	4	4	4	3	4	3	4	4	4	3	4	3	4	4	4	3	34.3	34.3	34.3	11.74	105	105	1.35	22	12			0	7.9291	By MS/MS	By MS/MS	By MS/MS	By MS/MS	By MS/MS	By MS/MS	34.3
P32119	P32119	7	6	6	Peroxiredoxin-2	PRDX2	>P32119 Peroxiredoxin-2 OS=Homo sapiens OX=9606 GN=PRDX2 PE=1 SV=5	1	7	6	6	7	7	6	7	7	7	6	6	5	6	6	6	6	6	5	6	6	6	31.8	26.3	26.3	21.892	198	198	1.94	22	13	7	6	0	32.141	By MS/MS	By MS/MS	By MS/MS	By MS/MS	By MS/MS	By MS/MS	31.8
P32969	P32969	3	3	3	60S ribosomal protein L9	RPL9	>P32969 60S ribosomal protein L9 OS=Homo sapiens OX=9606 GN=RPL9 PE=1 SV=1	1	3	3	3	1	1	0	1	3	0	1	1	0	1	3	0	1	1	0	1	3	0	18.2	18.2	18.2	21.863	192	192	3.33			4	2	0	3.9506	By MS/MS	By MS/MS	By matching	By MS/MS	By MS/MS	By matching	5.7
P33176;Q12840	P33176	10;4	10;4	6;0	Kinesin-1 heavy chain	KIF5B	>P33176 Kinesin-1 heavy chain OS=Homo sapiens OX=9606 GN=KIF5B PE=1 SV=1	2	10	10	6	8	7	4	7	8	4	8	7	4	7	8	4	5	6	3	5	5	2	13.2	13.2	8.1	109.68	963	963;1032	2.38	9	13	10	7	0	22.62	By MS/MS	By MS/MS	By matching	By MS/MS	By MS/MS	By MS/MS	10.9
P33908	P33908	4	4	4	Mannosyl-oligosaccharide 1,2-alpha-mannosidase IA	MAN1A1	>P33908 Mannosyl-oligosaccharide 1,2-alpha-mannosidase IA OS=Homo sapiens OX=9606 GN=MAN1A1 PE=1 SV=3	1	4	4	4	0	0	0	2	4	2	0	0	0	2	4	2	0	0	0	2	4	2	8.9	8.9	8.9	72.968	653	653	2.78	1	3	2	3	0	16.345	By matching	By matching	By matching	By matching	By MS/MS	By MS/MS	0
P34096	P34096	2	2	2	Ribonuclease 4	RNASE4	>P34096 Ribonuclease 4 OS=Homo sapiens OX=9606 GN=RNASE4 PE=1 SV=3	1	2	2	2	0	0	0	2	2	1	0	0	0	2	2	1	0	0	0	2	2	1	16.3	16.3	16.3	16.84	147	147	2.8		3		2	0	4.7444	By matching	By matching	By matching	By MS/MS	By MS/MS	By MS/MS	0
P34932	P34932	19	19	19	Heat shock 70 kDa protein 4	HSPA4	>P34932 Heat shock 70 kDa protein 4 OS=Homo sapiens OX=9606 GN=HSPA4 PE=1 SV=4	1	19	19	19	12	10	9	14	17	14	12	10	9	14	17	14	12	10	9	14	17	14	31.1	31.1	31.1	94.33	840	840	2.14	24	37	12	12	0	239.36	By MS/MS	By MS/MS	By MS/MS	By MS/MS	By MS/MS	By MS/MS	17.5
P34949	P34949	2	2	2	Mannose-6-phosphate isomerase	MPI	>P34949 Mannose-6-phosphate isomerase OS=Homo sapiens OX=9606 GN=MPI PE=1 SV=2	1	2	2	2	1	2	1	1	1	1	1	2	1	1	1	1	1	2	1	1	1	1	6.1	6.1	6.1	46.655	423	423	4				7	0	4.1739	By MS/MS	By MS/MS	By MS/MS	By MS/MS	By MS/MS	By MS/MS	2.6
P35052	P35052	5	5	5	Glypican-1;Secreted glypican-1	GPC1	>P35052 Glypican-1 OS=Homo sapiens OX=9606 GN=GPC1 PE=1 SV=2	1	5	5	5	2	1	1	4	5	4	2	1	1	4	5	4	2	1	1	4	5	4	12.9	12.9	12.9	61.68	558	558	3.1		7	5	9	0	23.613	By matching	By matching	By matching	By MS/MS	By MS/MS	By MS/MS	4.8
P35080	P35080	4	4	4	Profilin-2	PFN2	>P35080 Profilin-2 OS=Homo sapiens OX=9606 GN=PFN2 PE=1 SV=3	1	4	4	4	3	4	2	4	4	4	3	4	2	4	4	4	3	4	2	4	4	4	35	35	35	15.046	140	140	2.44	6	9	6	6	0	22.266	By MS/MS	By MS/MS	By MS/MS	By MS/MS	By MS/MS	By MS/MS	25
P35221;P26232;Q9UI47	P35221	10;4;1	10;4;1	10;4;1	Catenin alpha-1	CTNNA1	>P35221 Catenin alpha-1 OS=Homo sapiens OX=9606 GN=CTNNA1 PE=1 SV=1	3	10	10	10	8	7	2	7	8	6	8	7	2	7	8	6	8	7	2	7	8	6	13	13	13	100.07	906	906;953;895	2.85	8	8	5	18	0	21.304	By MS/MS	By MS/MS	By MS/MS	By MS/MS	By MS/MS	By MS/MS	9.7
P35222	P35222	2	2	2	Catenin beta-1	CTNNB1	>P35222 Catenin beta-1 OS=Homo sapiens OX=9606 GN=CTNNB1 PE=1 SV=1	1	2	2	2	2	1	1	1	2	0	2	1	1	1	2	0	2	1	1	1	2	0	3.2	3.2	3.2	85.496	781	781	2.71		2	5		0	4.2128	By MS/MS	By MS/MS	By matching	By MS/MS	By MS/MS	By matching	3.2
P35237;P50452	P35237	4;1	4;1	4;1	Serpin B6	SERPINB6	>P35237 Serpin B6 OS=Homo sapiens OX=9606 GN=SERPINB6 PE=1 SV=3	2	4	4	4	3	2	1	4	4	4	3	2	1	4	4	4	3	2	1	4	4	4	13	13	13	42.621	376	376;374	3.25			15	5	0	9.071	By MS/MS	By MS/MS	By MS/MS	By MS/MS	By MS/MS	By MS/MS	9
P35241	P35241	18	9	8	Radixin	RDX	>P35241 Radixin OS=Homo sapiens OX=9606 GN=RDX PE=1 SV=1	1	18	9	8	17	17	14	17	18	15	8	8	6	9	9	8	7	7	5	8	8	7	30.7	18.9	17.5	68.563	583	583	2.29	7	26	14	4	0	20.359	By MS/MS	By MS/MS	By matching	By MS/MS	By MS/MS	By MS/MS	26.2
P35442	P35442	20	17	17	Thrombospondin-2	THBS2	>P35442 Thrombospondin-2 OS=Homo sapiens OX=9606 GN=THBS2 PE=1 SV=2	1	20	17	17	5	4	4	10	19	19	2	1	1	7	16	16	2	1	1	7	16	16	24.1	20.9	20.9	129.99	1172	1172	2.46	14	9	14	11	0	233.39	By MS/MS	By matching	By matching	By MS/MS	By MS/MS	By MS/MS	5.8
P35443	P35443	4	2	2	Thrombospondin-4	THBS4	>P35443 Thrombospondin-4 OS=Homo sapiens OX=9606 GN=THBS4 PE=1 SV=2	1	4	2	2	4	2	3	3	3	3	2	0	1	1	1	1	2	0	1	1	1	1	5.9	3.2	3.2	105.87	961	961	1.17	5	1			0	7.4645	By MS/MS	By matching	By MS/MS	By matching	By matching	By MS/MS	5.9
P35555	P35555	86	86	82	Fibrillin-1	FBN1	>P35555 Fibrillin-1 OS=Homo sapiens OX=9606 GN=FBN1 PE=1 SV=3	1	86	86	82	70	39	58	70	81	68	70	39	58	70	81	68	67	37	54	68	77	66	38.2	38.2	37.2	312.24	2871	2871	2.23	162	155	155	64	0	323.31	By MS/MS	By MS/MS	By MS/MS	By MS/MS	By MS/MS	By MS/MS	29.3
P35556	P35556	48	44	44	Fibrillin-2	FBN2	>P35556 Fibrillin-2 OS=Homo sapiens OX=9606 GN=FBN2 PE=1 SV=3	1	48	44	44	33	8	46	27	20	29	30	6	42	25	16	27	30	6	42	25	16	27	19.8	18.6	18.6	314.77	2912	2912	2.51	37	42	58	33	0	265.71	By MS/MS	By matching	By MS/MS	By MS/MS	By MS/MS	By MS/MS	13.7
P35573	P35573	2	2	2	Glycogen debranching enzyme;4-alpha-glucanotransferase;Amylo-alpha-1,6-glucosidase	AGL	>P35573 Glycogen debranching enzyme OS=Homo sapiens OX=9606 GN=AGL PE=1 SV=3	1	2	2	2	1	2	1	1	1	1	1	2	1	1	1	1	1	2	1	1	1	1	1.6	1.6	1.6	174.76	1532	1532	1.43	6			1	0.0022434	1.912	By matching	By MS/MS	By matching	By matching	By MS/MS	By matching	0.6
P35579;P35749;P12883;Q9UKX3;Q9Y623;P13533;P12882;P11055;Q9UKX2;A7E2Y1	P35579	57;10;1;1;1;1;1;1;1;1	57;10;1;1;1;1;1;1;1;1	45;2;0;0;0;0;0;0;0;0	Myosin-9	MYH9	>P35579 Myosin-9 OS=Homo sapiens OX=9606 GN=MYH9 PE=1 SV=4	10	57	57	45	41	36	21	48	55	43	41	36	21	48	55	43	33	30	19	38	45	35	33.2	33.2	26.2	226.53	1960	1960;1972;1935;1938;1939;1939;1939;1940;1941;1983	2.05	131	55	67	40	0	323.31	By MS/MS	By MS/MS	By MS/MS	By MS/MS	By MS/MS	By MS/MS	25.1
P35580	P35580	16	6	6	Myosin-10	MYH10	>P35580 Myosin-10 OS=Homo sapiens OX=9606 GN=MYH10 PE=1 SV=3	1	16	6	6	8	6	2	10	13	10	0	0	0	1	5	2	0	0	0	1	5	2	9.1	3.6	3.6	229	1976	1976	1.12	7	1			0	8.1989	By matching	By matching	By matching	By matching	By MS/MS	By MS/MS	3.9
P35606	P35606	11	11	11	Coatomer subunit beta	COPB2	>P35606 Coatomer subunit beta OS=Homo sapiens OX=9606 GN=COPB2 PE=1 SV=2	1	11	11	11	6	9	3	7	9	5	6	9	3	7	9	5	6	9	3	7	9	5	16.8	16.8	16.8	102.49	906	906	3.21	1	1	26	11	0	30.67	By MS/MS	By MS/MS	By matching	By MS/MS	By MS/MS	By MS/MS	9.4
P35611	P35611	2	2	2	Alpha-adducin	ADD1	>P35611 Alpha-adducin OS=Homo sapiens OX=9606 GN=ADD1 PE=1 SV=2	1	2	2	2	2	2	1	1	1	1	2	2	1	1	1	1	2	2	1	1	1	1	3.7	3.7	3.7	80.954	737	737	2.88	3			5	0	3.8563	By MS/MS	By MS/MS	By MS/MS	By MS/MS	By matching	By matching	3.7
P35625	P35625	6	6	6	Metalloproteinase inhibitor 3	TIMP3	>P35625 Metalloproteinase inhibitor 3 OS=Homo sapiens OX=9606 GN=TIMP3 PE=1 SV=2	1	6	6	6	5	3	5	1	0	0	5	3	5	1	0	0	5	3	5	1	0	0	31.8	31.8	31.8	24.145	211	211	3.5		3	1	10	0	19.253	By MS/MS	By MS/MS	By MS/MS	By matching	By matching	By matching	26.1
P35637;Q92804	P35637;Q92804	2;1	2;1	2;1	RNA-binding protein FUS;TATA-binding protein-associated factor 2N	FUS;TAF15	>P35637 RNA-binding protein FUS OS=Homo sapiens OX=9606 GN=FUS PE=1 SV=1;>Q92804 TATA-binding protein-associated factor 2N OS=Homo sapiens OX=9606 GN=TAF15 PE=1 SV=1	2	2	2	2	2	0	0	1	1	0	2	0	0	1	1	0	2	0	0	1	1	0	7.2	7.2	7.2	53.425	526	526;592	1.17	5	1			0	21.587	By MS/MS	By matching	By matching	By MS/MS	By MS/MS	By matching	7.2
P35813	P35813	7	7	6	Protein phosphatase 1A	PPM1A	>P35813 Protein phosphatase 1A OS=Homo sapiens OX=9606 GN=PPM1A PE=1 SV=1	1	7	7	6	3	5	1	2	4	4	3	5	1	2	4	4	2	4	1	1	3	3	21.7	21.7	18.6	42.447	382	382	1.95	8	4	7		0	10.805	By MS/MS	By MS/MS	By matching	By MS/MS	By MS/MS	By MS/MS	8.6
P35998	P35998	12	12	12	26S protease regulatory subunit 7	PSMC2	>P35998 26S proteasome regulatory subunit 7 OS=Homo sapiens OX=9606 GN=PSMC2 PE=1 SV=3	1	12	12	12	10	11	7	11	10	7	10	11	7	11	10	7	10	11	7	11	10	7	32.3	32.3	32.3	48.633	433	433	3.14		21	15	30	0	42.739	By MS/MS	By MS/MS	By MS/MS	By MS/MS	By MS/MS	By MS/MS	27.5
P36222	P36222	15	15	15	Chitinase-3-like protein 1	CHI3L1	>P36222 Chitinase-3-like protein 1 OS=Homo sapiens OX=9606 GN=CHI3L1 PE=1 SV=2	1	15	15	15	0	0	0	3	14	15	0	0	0	3	14	15	0	0	0	3	14	15	44.9	44.9	44.9	42.625	383	383	2.81	22	13	14	40	0	296.48	By matching	By matching	By matching	By MS/MS	By MS/MS	By MS/MS	0
P36405	P36405	7	7	7	ADP-ribosylation factor-like protein 3	ARL3	>P36405 ADP-ribosylation factor-like protein 3 OS=Homo sapiens OX=9606 GN=ARL3 PE=1 SV=2	1	7	7	7	5	4	2	4	5	5	5	4	2	4	5	5	5	4	2	4	5	5	44	44	44	20.455	182	182	2.2	11	6		8	0	17.246	By MS/MS	By MS/MS	By MS/MS	By MS/MS	By MS/MS	By MS/MS	31.9
P36543;Q96A05	P36543	6;2	6;2	6;2	V-type proton ATPase subunit E 1	ATP6V1E1	>P36543 V-type proton ATPase subunit E 1 OS=Homo sapiens OX=9606 GN=ATP6V1E1 PE=1 SV=1	2	6	6	6	4	6	4	6	6	4	4	6	4	6	6	4	4	6	4	6	6	4	24.3	24.3	24.3	26.145	226	226;226	3.18	5	1	16	18	0	32.125	By MS/MS	By MS/MS	By MS/MS	By MS/MS	By MS/MS	By MS/MS	16.8
P36578	P36578	3	3	3	60S ribosomal protein L4	RPL4	>P36578 60S ribosomal protein L4 OS=Homo sapiens OX=9606 GN=RPL4 PE=1 SV=5	1	3	3	3	3	2	1	3	3	2	3	2	1	3	3	2	3	2	1	3	3	2	7.7	7.7	7.7	47.697	427	427	2.64		6	7	1	0	2.9803	By MS/MS	By MS/MS	By matching	By MS/MS	By MS/MS	By matching	7.7
P36871	P36871	19	19	19	Phosphoglucomutase-1	PGM1	>P36871 Phosphoglucomutase-1 OS=Homo sapiens OX=9606 GN=PGM1 PE=1 SV=3	1	19	19	19	17	18	14	16	19	14	17	18	14	16	19	14	17	18	14	16	19	14	41.1	41.1	41.1	61.448	562	562	2.64	26	27	33	35	0	116.32	By MS/MS	By MS/MS	By MS/MS	By MS/MS	By MS/MS	By MS/MS	36.1
P36952	P36952	6	6	6	Serpin B5	SERPINB5	>P36952 Serpin B5 OS=Homo sapiens OX=9606 GN=SERPINB5 PE=1 SV=2	1	6	6	6	6	2	6	2	2	2	6	2	6	2	2	2	6	2	6	2	2	2	22.1	22.1	22.1	42.1	375	375	2.88	5	4	6	11	0	49.013	By MS/MS	By MS/MS	By MS/MS	By matching	By matching	By MS/MS	22.1
P36955	P36955	13	13	9	Pigment epithelium-derived factor	SERPINF1	>P36955 Pigment epithelium-derived factor OS=Homo sapiens OX=9606 GN=SERPINF1 PE=1 SV=4	1	13	13	9	5	6	5	11	12	12	5	6	5	11	12	12	1	2	1	7	8	8	31.1	31.1	21.8	46.312	418	418	2.59	7	36	13	19	0	90.643	By MS/MS	By MS/MS	By MS/MS	By MS/MS	By MS/MS	By MS/MS	11.5
P36957	P36957	4	4	4	Dihydrolipoyllysine-residue succinyltransferase component of 2-oxoglutarate dehydrogenase complex, mitochondrial	DLST	>P36957 Dihydrolipoyllysine-residue succinyltransferase component of 2-oxoglutarate dehydrogenase complex, mitochondrial OS=Homo sapiens OX=9606 GN=DLST PE=1 SV=4	1	4	4	4	4	4	2	3	4	3	4	4	2	3	4	3	4	4	2	3	4	3	8.8	8.8	8.8	48.755	453	453	2.92	6	2	4	12	0	18.027	By MS/MS	By MS/MS	By MS/MS	By MS/MS	By MS/MS	By MS/MS	8.8
P37802	P37802	11	11	10	Transgelin-2	TAGLN2	>P37802 Transgelin-2 OS=Homo sapiens OX=9606 GN=TAGLN2 PE=1 SV=3	1	11	11	10	11	9	10	11	10	9	11	9	10	11	10	9	10	9	9	10	9	9	63.3	63.3	56.3	22.391	199	199	2.81	18	14	29	32	0	85.186	By MS/MS	By MS/MS	By MS/MS	By MS/MS	By MS/MS	By MS/MS	63.3
P37837	P37837	14	14	14	Transaldolase	TALDO1	>P37837 Transaldolase OS=Homo sapiens OX=9606 GN=TALDO1 PE=1 SV=2	1	14	14	14	12	10	7	6	12	9	12	10	7	6	12	9	12	10	7	6	12	9	39.2	39.2	39.2	37.54	337	337	2.85	19	7	15	34	0	57.436	By MS/MS	By MS/MS	By MS/MS	By MS/MS	By MS/MS	By MS/MS	33.2
P38117	P38117	3	3	3	Electron transfer flavoprotein subunit beta	ETFB	>P38117 Electron transfer flavoprotein subunit beta OS=Homo sapiens OX=9606 GN=ETFB PE=1 SV=3	1	3	3	3	3	1	0	2	2	2	3	1	0	2	2	2	3	1	0	2	2	2	11.4	11.4	11.4	27.843	255	255	1.3	7	3			0.00063012	2.6632	By MS/MS	By MS/MS	By matching	By MS/MS	By MS/MS	By matching	11.4
P38159;Q96E39;O75526	P38159;Q96E39;O75526	4;2;2	4;2;2	3;1;1	RNA-binding motif protein, X chromosome;RNA-binding motif protein, X chromosome, N-terminally processed;RNA binding motif protein, X-linked-like-1;RNA-binding motif protein, X-linked-like-2	RBMX;RBMXL1;RBMXL2	>P38159 RNA-binding motif protein, X chromosome OS=Homo sapiens OX=9606 GN=RBMX PE=1 SV=3;>Q96E39 RNA binding motif protein, X-linked-like-1 OS=Homo sapiens OX=9606 GN=RBMXL1 PE=1 SV=1;>O75526 RNA-binding motif protein, X-linked-like-2 OS=Homo sapiens OX=9	3	4	4	3	4	3	2	3	3	3	4	3	2	3	3	3	3	2	2	2	2	3	12.3	12.3	8.7	42.331	391	391;390;392	2.21	11	2	6	5	0	16.992	By MS/MS	By MS/MS	By MS/MS	By MS/MS	By MS/MS	By MS/MS	12.3
P38571	P38571	2	2	2	Lysosomal acid lipase/cholesteryl ester hydrolase	LIPA	>P38571 Lysosomal acid lipase/cholesteryl ester hydrolase OS=Homo sapiens OX=9606 GN=LIPA PE=1 SV=2	1	2	2	2	1	0	2	0	0	0	1	0	2	0	0	0	1	0	2	0	0	0	5.3	5.3	5.3	45.418	399	399	4				3	0	3.2029	By MS/MS	By matching	By MS/MS	By matching	By matching	By matching	2.8
P38606	P38606	14	14	14	V-type proton ATPase catalytic subunit A	ATP6V1A	>P38606 V-type proton ATPase catalytic subunit A OS=Homo sapiens OX=9606 GN=ATP6V1A PE=1 SV=2	1	14	14	14	11	11	7	13	10	9	11	11	7	13	10	9	11	11	7	13	10	9	28	28	28	68.303	617	617	2.95	9	12	30	26	0	142.56	By MS/MS	By MS/MS	By MS/MS	By MS/MS	By MS/MS	By MS/MS	21.7
P38646	P38646	19	18	18	Stress-70 protein, mitochondrial	HSPA9	>P38646 Stress-70 protein, mitochondrial OS=Homo sapiens OX=9606 GN=HSPA9 PE=1 SV=2	1	19	18	18	15	16	14	17	17	15	15	15	14	16	16	14	15	15	14	16	16	14	34.2	33.1	33.1	73.68	679	679	2.28	25	51	19	19	0	159.88	By MS/MS	By MS/MS	By MS/MS	By MS/MS	By MS/MS	By MS/MS	28.1
P39023	P39023	3	3	3	60S ribosomal protein L3	RPL3	>P39023 60S ribosomal protein L3 OS=Homo sapiens OX=9606 GN=RPL3 PE=1 SV=2	1	3	3	3	2	2	0	2	2	2	2	2	0	2	2	2	2	2	0	2	2	2	7.2	7.2	7.2	46.108	403	403	3.08	2		5	5	0	5.1389	By MS/MS	By MS/MS	By matching	By MS/MS	By MS/MS	By matching	4.2
P39059	P39059	2	2	2	Collagen alpha-1(XV) chain;Restin;Restin-2;Restin-3;Restin-4	COL15A1	>P39059 Collagen alpha-1(XV) chain OS=Homo sapiens OX=9606 GN=COL15A1 PE=1 SV=2	1	2	2	2	0	0	0	0	2	0	0	0	0	0	2	0	0	0	0	0	2	0	2.2	2.2	2.2	141.72	1388	1388	2.5	1			1	0	3.0864	By matching	By matching	By matching	By matching	By MS/MS	By matching	0
P39060	P39060	4	4	4	Collagen alpha-1(XVIII) chain;Endostatin	COL18A1	>P39060 Collagen alpha-1(XVIII) chain OS=Homo sapiens OX=9606 GN=COL18A1 PE=1 SV=5	1	4	4	4	1	1	0	1	3	4	1	1	0	1	3	4	1	1	0	1	3	4	3.4	3.4	3.4	178.19	1754	1754	2.7		5	3	2	0	31.885	By MS/MS	By MS/MS	By matching	By MS/MS	By MS/MS	By MS/MS	0.6
P39687;O43423	P39687	10;2	10;2	6;1	Acidic leucine-rich nuclear phosphoprotein 32 family member A	ANP32A	>P39687 Acidic leucine-rich nuclear phosphoprotein 32 family member A OS=Homo sapiens OX=9606 GN=ANP32A PE=1 SV=1	2	10	10	6	8	9	8	8	10	9	8	9	8	8	10	9	4	5	4	4	6	5	32.9	32.9	22.5	28.585	249	249;234	2.76	14	12	17	24	0	79.915	By MS/MS	By MS/MS	By MS/MS	By MS/MS	By MS/MS	By MS/MS	28.5
P40121	P40121	6	6	6	Macrophage-capping protein	CAPG	>P40121 Macrophage-capping protein OS=Homo sapiens OX=9606 GN=CAPG PE=1 SV=2	1	6	6	6	6	4	4	2	0	1	6	4	4	2	0	1	6	4	4	2	0	1	20.1	20.1	20.1	38.498	348	348	2.81		11	3	7	0	29.936	By MS/MS	By MS/MS	By MS/MS	By matching	By matching	By matching	20.1
P40227;Q92526	P40227	11;2	11;2	11;2	T-complex protein 1 subunit zeta	CCT6A	>P40227 T-complex protein 1 subunit zeta OS=Homo sapiens OX=9606 GN=CCT6A PE=1 SV=3	2	11	11	11	9	6	3	6	8	4	9	6	3	6	8	4	9	6	3	6	8	4	29.6	29.6	29.6	58.024	531	531;530	2.77	6	6	18	9	0	35.378	By MS/MS	By MS/MS	By MS/MS	By MS/MS	By MS/MS	By matching	25.4
P40261	P40261	6	6	6	Nicotinamide N-methyltransferase	NNMT	>P40261 Nicotinamide N-methyltransferase OS=Homo sapiens OX=9606 GN=NNMT PE=1 SV=1	1	6	6	6	0	0	0	5	5	2	0	0	0	5	5	2	0	0	0	5	5	2	28	28	28	29.574	264	264	2.67	3	4	3	5	0	28.997	By matching	By matching	By matching	By MS/MS	By MS/MS	By MS/MS	0
P40925	P40925	12	12	12	Malate dehydrogenase, cytoplasmic	MDH1	>P40925 Malate dehydrogenase, cytoplasmic OS=Homo sapiens OX=9606 GN=MDH1 PE=1 SV=4	1	12	12	12	10	11	10	9	12	10	10	11	10	9	12	10	10	11	10	9	12	10	39.8	39.8	39.8	36.426	334	334	3.04	3	31	18	41	0	151.71	By MS/MS	By MS/MS	By MS/MS	By MS/MS	By MS/MS	By MS/MS	33.2
P40926	P40926	10	10	10	Malate dehydrogenase, mitochondrial	MDH2	>P40926 Malate dehydrogenase, mitochondrial OS=Homo sapiens OX=9606 GN=MDH2 PE=1 SV=3	1	10	10	10	7	8	6	8	10	8	7	8	6	8	10	8	7	8	6	8	10	8	39.3	39.3	39.3	35.503	338	338	2.55	12	20	27	12	0	67.174	By MS/MS	By MS/MS	By MS/MS	By MS/MS	By MS/MS	By MS/MS	24
P40939	P40939	2	2	2	Trifunctional enzyme subunit alpha, mitochondrial;Long-chain enoyl-CoA hydratase;Long chain 3-hydroxyacyl-CoA dehydrogenase	HADHA	>P40939 Trifunctional enzyme subunit alpha, mitochondrial OS=Homo sapiens OX=9606 GN=HADHA PE=1 SV=2	1	2	2	2	2	2	0	1	2	1	2	2	0	1	2	1	2	2	0	1	2	1	3.3	3.3	3.3	82.999	763	763	4				8	0	3.8338	By matching	By MS/MS	By matching	By MS/MS	By MS/MS	By matching	3.3
P41091;Q2VIR3	P41091;Q2VIR3	6;5	6;5	6;5	Eukaryotic translation initiation factor 2 subunit 3;Putative eukaryotic translation initiation factor 2 subunit 3-like protein	EIF2S3;EIF2S3L	>P41091 Eukaryotic translation initiation factor 2 subunit 3 OS=Homo sapiens OX=9606 GN=EIF2S3 PE=1 SV=3;>Q2VIR3 Eukaryotic translation initiation factor 2 subunit 3B OS=Homo sapiens OX=9606 GN=EIF2S3B PE=2 SV=2	2	6	6	6	4	4	2	3	6	3	4	4	2	3	6	3	4	4	2	3	6	3	14	14	14	51.109	472	472;472	3.18	1		15	6	0	13.839	By MS/MS	By MS/MS	By MS/MS	By matching	By MS/MS	By MS/MS	8.9
P41221;Q9H1J7	P41221	5;2	5;2	5;2	Protein Wnt-5a	WNT5A	>P41221 Protein Wnt-5a OS=Homo sapiens OX=9606 GN=WNT5A PE=1 SV=2	2	5	5	5	3	2	3	4	5	2	3	2	3	4	5	2	3	2	3	4	5	2	12.6	12.6	12.6	42.339	380	380;359	3.33	3		9	15	0	11.349	By MS/MS	By MS/MS	By MS/MS	By MS/MS	By MS/MS	By matching	8.2
P41250	P41250	3	3	3	Glycine--tRNA ligase	GARS	>P41250 Glycine--tRNA ligase OS=Homo sapiens OX=9606 GN=GARS PE=1 SV=3	1	3	3	3	3	1	1	2	2	2	3	1	1	2	2	2	3	1	1	2	2	2	4.6	4.6	4.6	83.165	739	739	2.21	5	1	8		0	26.008	By MS/MS	By MS/MS	By MS/MS	By MS/MS	By MS/MS	By MS/MS	4.6
P42167;P42166	P42167;P42166	2;2	2;2	2;2	Lamina-associated polypeptide 2, isoforms beta/gamma;Thymopoietin;Thymopentin;Lamina-associated polypeptide 2, isoform alpha;Thymopoietin;Thymopentin	TMPO	>P42167 Lamina-associated polypeptide 2, isoforms beta/gamma OS=Homo sapiens OX=9606 GN=TMPO PE=1 SV=2;>P42166 Lamina-associated polypeptide 2, isoform alpha OS=Homo sapiens OX=9606 GN=TMPO PE=1 SV=2	2	2	2	2	0	2	0	0	1	0	0	2	0	0	1	0	0	2	0	0	1	0	5.5	5.5	5.5	50.67	454	454;694	3			4		0	13.678	By matching	By MS/MS	By matching	By matching	By MS/MS	By matching	0
P42224	P42224	4	4	4	Signal transducer and activator of transcription 1-alpha/beta	STAT1	>P42224 Signal transducer and activator of transcription 1-alpha/beta OS=Homo sapiens OX=9606 GN=STAT1 PE=1 SV=2	1	4	4	4	1	2	1	1	1	2	1	2	1	1	1	2	1	2	1	1	1	2	6	6	6	87.334	750	750	2.88	2	1	1	4	0	4.2746	By matching	By MS/MS	By MS/MS	By matching	By MS/MS	By MS/MS	1.6
P42566	P42566	2	2	2	Epidermal growth factor receptor substrate 15	EPS15	>P42566 Epidermal growth factor receptor substrate 15 OS=Homo sapiens OX=9606 GN=EPS15 PE=1 SV=2	1	2	2	2	0	2	0	0	1	0	0	2	0	0	1	0	0	2	0	0	1	0	2.9	2.9	2.9	98.655	896	896	2		3			0	3.8246	By matching	By MS/MS	By matching	By matching	By matching	By matching	0
P42785	P42785	3	3	3	Lysosomal Pro-X carboxypeptidase	PRCP	>P42785 Lysosomal Pro-X carboxypeptidase OS=Homo sapiens OX=9606 GN=PRCP PE=1 SV=1	1	3	3	3	0	0	0	1	2	0	0	0	0	1	2	0	0	0	0	1	2	0	8.9	8.9	8.9	55.799	496	496	3.33			2	1	0	8.0876	By matching	By matching	By matching	By MS/MS	By MS/MS	By matching	0
P42830	P42830	4	4	3	C-X-C motif chemokine 5;ENA-78(8-78);ENA-78(9-78)	CXCL5	>P42830 C-X-C motif chemokine 5 OS=Homo sapiens OX=9606 GN=CXCL5 PE=1 SV=1	1	4	4	3	0	0	1	4	4	4	0	0	1	4	4	4	0	0	1	3	3	3	35.1	35.1	28.1	11.972	114	114	2.65	1	6	12	1	0	17.862	By matching	By matching	By matching	By MS/MS	By MS/MS	By MS/MS	0
P43034	P43034	7	7	7	Platelet-activating factor acetylhydrolase IB subunit alpha	PAFAH1B1	>P43034 Platelet-activating factor acetylhydrolase IB subunit alpha OS=Homo sapiens OX=9606 GN=PAFAH1B1 PE=1 SV=2	1	7	7	7	5	6	3	5	5	4	5	6	3	5	5	4	5	6	3	5	5	4	25.1	25.1	25.1	46.637	410	410	2.92		15	9	12	0	74.187	By MS/MS	By MS/MS	By MS/MS	By MS/MS	By MS/MS	By MS/MS	16.3
P43243	P43243	3	3	3	Matrin-3	MATR3	>P43243 Matrin-3 OS=Homo sapiens OX=9606 GN=MATR3 PE=1 SV=2	1	3	3	3	3	2	1	2	3	1	3	2	1	2	3	1	3	2	1	2	3	1	5.1	5.1	5.1	94.622	847	847	2.75		6	3	3	0	3.8119	By MS/MS	By matching	By matching	By matching	By MS/MS	By matching	5.1
P43251	P43251	3	3	3	Biotinidase	BTD	>P43251 Biotinidase OS=Homo sapiens OX=9606 GN=BTD PE=1 SV=2	1	3	3	3	2	2	2	1	3	2	2	2	2	1	3	2	2	2	2	1	3	2	6.4	6.4	6.4	61.132	543	543	2.42	6		1	5	0	7.7992	By MS/MS	By MS/MS	By MS/MS	By matching	By MS/MS	By MS/MS	4.8
P43490	P43490	7	7	7	Nicotinamide phosphoribosyltransferase	NAMPT	>P43490 Nicotinamide phosphoribosyltransferase OS=Homo sapiens OX=9606 GN=NAMPT PE=1 SV=1	1	7	7	7	5	0	0	5	7	4	5	0	0	5	7	4	5	0	0	5	7	4	21.6	21.6	21.6	55.52	491	491	3.04	4	6	1	15	0	96.347	By MS/MS	By matching	By matching	By MS/MS	By MS/MS	By MS/MS	14.9
P43686	P43686	5	5	5	26S protease regulatory subunit 6B	PSMC4	>P43686 26S proteasome regulatory subunit 6B OS=Homo sapiens OX=9606 GN=PSMC4 PE=1 SV=2	1	5	5	5	4	4	3	4	5	3	4	4	3	4	5	3	4	4	3	4	5	3	12.7	12.7	12.7	47.366	418	418	2.57	6		22		0	25.355	By MS/MS	By MS/MS	By matching	By MS/MS	By MS/MS	By MS/MS	10.3
P45973	P45973	2	2	2	Chromobox protein homolog 5	CBX5	>P45973 Chromobox protein homolog 5 OS=Homo sapiens OX=9606 GN=CBX5 PE=1 SV=1	1	2	2	2	2	2	1	1	1	2	2	2	1	1	1	2	2	2	1	1	1	2	12.6	12.6	12.6	22.225	191	191	2.33	3		6		0	4.4191	By MS/MS	By MS/MS	By MS/MS	By MS/MS	By matching	By MS/MS	12.6
P45974	P45974	6	6	6	Ubiquitin carboxyl-terminal hydrolase 5	USP5	>P45974 Ubiquitin carboxyl-terminal hydrolase 5 OS=Homo sapiens OX=9606 GN=USP5 PE=1 SV=2	1	6	6	6	4	3	4	3	3	3	4	3	4	3	3	3	4	3	4	3	3	3	10.3	10.3	10.3	95.785	858	858	2.6	6	5		9	0	10.848	By MS/MS	By MS/MS	By MS/MS	By MS/MS	By MS/MS	By MS/MS	7.2
P46060	P46060	4	4	4	Ran GTPase-activating protein 1	RANGAP1	>P46060 Ran GTPase-activating protein 1 OS=Homo sapiens OX=9606 GN=RANGAP1 PE=1 SV=1	1	4	4	4	1	1	1	3	3	1	1	1	1	3	3	1	1	1	1	3	3	1	7.7	7.7	7.7	63.541	587	587	3.7			3	7	0	17.153	By MS/MS	By matching	By MS/MS	By MS/MS	By MS/MS	By MS/MS	1.9
P46108	P46108	8	8	8	Adapter molecule crk	CRK	>P46108 Adapter molecule crk OS=Homo sapiens OX=9606 GN=CRK PE=1 SV=2	1	8	8	8	7	8	5	8	8	6	7	8	5	8	8	6	7	8	5	8	8	6	36.8	36.8	36.8	33.83	304	304	3.07	6	5	15	20	0	33.908	By MS/MS	By MS/MS	By MS/MS	By MS/MS	By MS/MS	By MS/MS	34.5
P46109	P46109	7	7	7	Crk-like protein	CRKL	>P46109 Crk-like protein OS=Homo sapiens OX=9606 GN=CRKL PE=1 SV=1	1	7	7	7	6	7	5	6	5	6	6	7	5	6	5	6	6	7	5	6	5	6	33.3	33.3	33.3	33.777	303	303	3.45		6	11	25	0	31.314	By MS/MS	By MS/MS	By MS/MS	By MS/MS	By MS/MS	By MS/MS	29.4
P46459	P46459	5	5	5	Vesicle-fusing ATPase	NSF	>P46459 Vesicle-fusing ATPase OS=Homo sapiens OX=9606 GN=NSF PE=1 SV=3	1	5	5	5	4	5	3	4	4	4	4	5	3	4	4	4	4	5	3	4	4	4	7.4	7.4	7.4	82.593	744	744	2.4	2	15	4	4	0	8.2149	By MS/MS	By MS/MS	By MS/MS	By MS/MS	By MS/MS	By MS/MS	6.2
P46777	P46777	5	5	5	60S ribosomal protein L5	RPL5	>P46777 60S ribosomal protein L5 OS=Homo sapiens OX=9606 GN=RPL5 PE=1 SV=3	1	5	5	5	4	4	4	3	5	3	4	4	4	3	5	3	4	4	4	3	5	3	18.9	18.9	18.9	34.362	297	297	2.34	6	7	16		0	13.845	By MS/MS	By MS/MS	By MS/MS	By MS/MS	By MS/MS	By MS/MS	18.5
P46781	P46781	6	6	6	40S ribosomal protein S9	RPS9	>P46781 40S ribosomal protein S9 OS=Homo sapiens OX=9606 GN=RPS9 PE=1 SV=3	1	6	6	6	4	6	3	5	6	4	4	6	3	5	6	4	4	6	3	5	6	4	26.3	26.3	26.3	22.591	194	194	2.68	9	5		14	0	8.3711	By MS/MS	By MS/MS	By MS/MS	By MS/MS	By MS/MS	By MS/MS	16.5
P46782	P46782	2	2	2	40S ribosomal protein S5;40S ribosomal protein S5, N-terminally processed	RPS5	>P46782 40S ribosomal protein S5 OS=Homo sapiens OX=9606 GN=RPS5 PE=1 SV=4	1	2	2	2	1	1	1	1	2	1	1	1	1	1	2	1	1	1	1	1	2	1	11.8	11.8	11.8	22.876	204	204	2.93		1	13		0	5.1432	By MS/MS	By MS/MS	By MS/MS	By MS/MS	By MS/MS	By MS/MS	7.4
P46783;Q9NQ39	P46783;Q9NQ39	2;1	2;1	2;1	40S ribosomal protein S10;Putative 40S ribosomal protein S10-like	RPS10;RPS10P5	>P46783 40S ribosomal protein S10 OS=Homo sapiens OX=9606 GN=RPS10 PE=1 SV=1;>Q9NQ39 Putative 40S ribosomal protein S10-like OS=Homo sapiens OX=9606 GN=RPS10P5 PE=5 SV=1	2	2	2	2	2	1	1	1	1	1	2	1	1	1	1	1	2	1	1	1	1	1	13.9	13.9	13.9	18.898	165	165;176	2		7			0	6.8377	By MS/MS	By matching	By matching	By matching	By MS/MS	By matching	13.9
P46821	P46821	15	15	14	Microtubule-associated protein 1B;MAP1B heavy chain;MAP1 light chain LC1	MAP1B	>P46821 Microtubule-associated protein 1B OS=Homo sapiens OX=9606 GN=MAP1B PE=1 SV=2	1	15	15	14	11	9	7	13	13	6	11	9	7	13	13	6	10	8	6	12	12	5	7.3	7.3	6.9	270.63	2468	2468	2.32	22	13	17	13	0	51.578	By MS/MS	By MS/MS	By MS/MS	By MS/MS	By MS/MS	By MS/MS	5
P46926	P46926	5	5	3	Glucosamine-6-phosphate isomerase 1	GNPDA1	>P46926 Glucosamine-6-phosphate isomerase 1 OS=Homo sapiens OX=9606 GN=GNPDA1 PE=1 SV=1	1	5	5	3	3	3	2	2	4	4	3	3	2	2	4	4	2	2	1	1	2	2	22.8	22.8	12.1	32.668	289	289	3.62		5		21	0	18.92	By MS/MS	By MS/MS	By matching	By MS/MS	By MS/MS	By MS/MS	12.8
P46940;Q13576;Q86VI3	P46940	33;1;1	33;1;1	33;1;1	Ras GTPase-activating-like protein IQGAP1	IQGAP1	>P46940 Ras GTPase-activating-like protein IQGAP1 OS=Homo sapiens OX=9606 GN=IQGAP1 PE=1 SV=1	3	33	33	33	30	24	22	23	24	18	30	24	22	23	24	18	30	24	22	23	24	18	25.2	25.2	25.2	189.25	1657	1657;1575;1631	2.56	37	40	41	43	0	153.11	By MS/MS	By MS/MS	By MS/MS	By MS/MS	By MS/MS	By MS/MS	22.9
P46976	P46976	2	2	2	Glycogenin-1	GYG1	>P46976 Glycogenin-1 OS=Homo sapiens OX=9606 GN=GYG1 PE=1 SV=4	1	2	2	2	2	2	2	2	1	0	2	2	2	2	1	0	2	2	2	2	1	0	6.9	6.9	6.9	39.383	350	350	3.56			4	5	0	5.9904	By MS/MS	By MS/MS	By MS/MS	By MS/MS	By MS/MS	By matching	6.9
P47755	P47755	9	9	8	F-actin-capping protein subunit alpha-2	CAPZA2	>P47755 F-actin-capping protein subunit alpha-2 OS=Homo sapiens OX=9606 GN=CAPZA2 PE=1 SV=3	1	9	9	8	7	6	6	8	7	5	7	6	6	8	7	5	6	5	5	7	6	4	47.9	47.9	44.4	32.949	286	286	2.8	8	12		20	0	79.244	By MS/MS	By MS/MS	By MS/MS	By MS/MS	By MS/MS	By MS/MS	37.1
P47756	P47756	11	11	11	F-actin-capping protein subunit beta	CAPZB	>P47756 F-actin-capping protein subunit beta OS=Homo sapiens OX=9606 GN=CAPZB PE=1 SV=4	1	11	11	11	7	9	5	8	11	9	7	9	5	8	11	9	7	9	5	8	11	9	40.1	40.1	40.1	31.35	277	277	2.26	4	38	13	3	0	74.769	By MS/MS	By MS/MS	By MS/MS	By MS/MS	By MS/MS	By MS/MS	28.9
P47895	P47895	6	4	4	Aldehyde dehydrogenase family 1 member A3	ALDH1A3	>P47895 Aldehyde dehydrogenase family 1 member A3 OS=Homo sapiens OX=9606 GN=ALDH1A3 PE=1 SV=2	1	6	4	4	4	2	2	6	5	1	2	0	0	4	3	0	2	0	0	4	3	0	12.9	9.2	9.2	56.108	512	512	3		3	3	3	0	5.9568	By matching	By matching	By matching	By MS/MS	By MS/MS	By matching	8.6
P47897	P47897	3	3	3	Glutamine--tRNA ligase	QARS	>P47897 Glutamine--tRNA ligase OS=Homo sapiens OX=9606 GN=QARS PE=1 SV=1	1	3	3	3	2	1	0	1	2	0	2	1	0	1	2	0	2	1	0	1	2	0	4.8	4.8	4.8	87.798	775	775	3.29	1	1		5	0	4.6594	By MS/MS	By MS/MS	By matching	By matching	By MS/MS	By matching	3.7
P47972	P47972	2	2	2	Neuronal pentraxin-2	NPTX2	>P47972 Neuronal pentraxin-2 OS=Homo sapiens OX=9606 GN=NPTX2 PE=1 SV=2	1	2	2	2	1	1	0	1	2	1	1	1	0	1	2	1	1	1	0	1	2	1	3.5	3.5	3.5	47.041	431	431	2.33	2		4		0.0017689	2.1712	By MS/MS	By MS/MS	By matching	By MS/MS	By MS/MS	By MS/MS	1.6
P47989	P47989	2	2	2	Xanthine dehydrogenase/oxidase;Xanthine dehydrogenase;Xanthine oxidase	XDH	>P47989 Xanthine dehydrogenase/oxidase OS=Homo sapiens OX=9606 GN=XDH PE=1 SV=4	1	2	2	2	2	1	1	1	1	2	2	1	1	1	1	2	2	1	1	1	1	2	1.5	1.5	1.5	146.42	1333	1333	3.89			1	8	0.0033333	1.8597	By MS/MS	By matching	By matching	By matching	By matching	By MS/MS	1.5
P48147	P48147	3	3	3	Prolyl endopeptidase	PREP	>P48147 Prolyl endopeptidase OS=Homo sapiens OX=9606 GN=PREP PE=1 SV=2	1	3	3	3	3	2	2	3	2	0	3	2	2	3	2	0	3	2	2	3	2	0	5.4	5.4	5.4	80.699	710	710	2.25		9	3		0	12.032	By MS/MS	By MS/MS	By matching	By MS/MS	By matching	By matching	5.4
P48163	P48163	3	3	3	NADP-dependent malic enzyme	ME1	>P48163 NADP-dependent malic enzyme OS=Homo sapiens OX=9606 GN=ME1 PE=1 SV=1	1	3	3	3	1	1	1	3	1	1	1	1	1	3	1	1	1	1	1	3	1	1	4.7	4.7	4.7	64.149	572	572	2	2	5		1	0	4.3057	By matching	By MS/MS	By MS/MS	By MS/MS	By matching	By MS/MS	1.6
P48307	P48307	6	6	6	Tissue factor pathway inhibitor 2	TFPI2	>P48307 Tissue factor pathway inhibitor 2 OS=Homo sapiens OX=9606 GN=TFPI2 PE=1 SV=1	1	6	6	6	0	0	0	6	6	6	0	0	0	6	6	6	0	0	0	6	6	6	27.2	27.2	27.2	26.934	235	235	2.74	7		8	8	0	81.284	By matching	By matching	By matching	By MS/MS	By MS/MS	By MS/MS	0
P48444	P48444	10	10	10	Coatomer subunit delta	ARCN1	>P48444 Coatomer subunit delta OS=Homo sapiens OX=9606 GN=ARCN1 PE=1 SV=1	1	10	10	10	8	7	3	7	9	6	8	7	3	7	9	6	8	7	3	7	9	6	21.7	21.7	21.7	57.21	511	511	2.22	13	11	12	5	0	27.111	By MS/MS	By MS/MS	By MS/MS	By MS/MS	By MS/MS	By MS/MS	17.6
P48556	P48556	2	2	2	26S proteasome non-ATPase regulatory subunit 8	PSMD8	>P48556 26S proteasome non-ATPase regulatory subunit 8 OS=Homo sapiens OX=9606 GN=PSMD8 PE=1 SV=2	1	2	2	2	1	2	1	1	1	1	1	2	1	1	1	1	1	2	1	1	1	1	4.6	4.6	4.6	39.611	350	350	3.57	1			6	0.0073801	1.5626	By matching	By MS/MS	By matching	By matching	By matching	By MS/MS	2.3
P48637	P48637	5	5	5	Glutathione synthetase	GSS	>P48637 Glutathione synthetase OS=Homo sapiens OX=9606 GN=GSS PE=1 SV=1	1	5	5	5	3	4	2	4	5	5	3	4	2	4	5	5	3	4	2	4	5	5	9.7	9.7	9.7	52.384	474	474	3		6	14	6	0	9.1736	By MS/MS	By MS/MS	By matching	By MS/MS	By MS/MS	By MS/MS	6.1
P48643	P48643	9	9	9	T-complex protein 1 subunit epsilon	CCT5	>P48643 T-complex protein 1 subunit epsilon OS=Homo sapiens OX=9606 GN=CCT5 PE=1 SV=1	1	9	9	9	9	7	6	8	9	5	9	7	6	8	9	5	9	7	6	8	9	5	18.9	18.9	18.9	59.67	541	541	3.32	11		15	45	0	68.368	By MS/MS	By MS/MS	By MS/MS	By MS/MS	By MS/MS	By MS/MS	18.9
P48681	P48681	2	2	2	Nestin	NES	>P48681 Nestin OS=Homo sapiens OX=9606 GN=NES PE=1 SV=2	1	2	2	2	1	1	1	2	1	2	1	1	1	2	1	2	1	1	1	2	1	2	1.9	1.9	1.9	177.44	1621	1621	2.5		6		2	0.0048335	1.6576	By matching	By matching	By matching	By MS/MS	By MS/MS	By matching	0.7
P48723	P48723	7	7	7	Heat shock 70 kDa protein 13	HSPA13	>P48723 Heat shock 70 kDa protein 13 OS=Homo sapiens OX=9606 GN=HSPA13 PE=1 SV=1	1	7	7	7	6	6	5	6	6	5	6	6	5	6	6	5	6	6	5	6	6	5	18.7	18.7	18.7	51.927	471	471	2.66	6	12	5	12	0	39.51	By MS/MS	By MS/MS	By MS/MS	By MS/MS	By MS/MS	By MS/MS	16.8
P48735	P48735	4	3	3	Isocitrate dehydrogenase [NADP], mitochondrial	IDH2	>P48735 Isocitrate dehydrogenase [NADP], mitochondrial OS=Homo sapiens OX=9606 GN=IDH2 PE=1 SV=2	1	4	3	3	2	3	2	3	4	3	1	2	1	2	3	2	1	2	1	2	3	2	8.4	6.4	6.4	50.909	452	452	2.27	6		1	4	0.00063694	2.7779	By MS/MS	By MS/MS	By matching	By matching	By MS/MS	By matching	4.4
P48739	P48739	5	5	5	Phosphatidylinositol transfer protein beta isoform	PITPNB	>P48739 Phosphatidylinositol transfer protein beta isoform OS=Homo sapiens OX=9606 GN=PITPNB PE=1 SV=2	1	5	5	5	4	5	2	3	2	3	4	5	2	3	2	3	4	5	2	3	2	3	20.3	20.3	20.3	31.54	271	271	1.63	12	2	5		0	9.5006	By MS/MS	By MS/MS	By MS/MS	By MS/MS	By MS/MS	By MS/MS	15.5
P48740	P48740	6	6	6	Mannan-binding lectin serine protease 1;Mannan-binding lectin serine protease 1 heavy chain;Mannan-binding lectin serine protease 1 light chain	MASP1	>P48740 Mannan-binding lectin serine protease 1 OS=Homo sapiens OX=9606 GN=MASP1 PE=1 SV=3	1	6	6	6	0	0	0	0	6	3	0	0	0	0	6	3	0	0	0	0	6	3	13.3	13.3	13.3	79.246	699	699	2.22	1	6	1	1	0	51.74	By matching	By matching	By matching	By matching	By MS/MS	By MS/MS	0
P49023	P49023	2	2	2	Paxillin	PXN	>P49023 Paxillin OS=Homo sapiens OX=9606 GN=PXN PE=1 SV=3	1	2	2	2	2	0	1	1	1	0	2	0	1	1	1	0	2	0	1	1	1	0	5.2	5.2	5.2	64.505	591	591	3			5		0	3.6025	By MS/MS	By matching	By matching	By MS/MS	By MS/MS	By matching	5.2
P49189	P49189	11	11	11	4-trimethylaminobutyraldehyde dehydrogenase	ALDH9A1	>P49189 4-trimethylaminobutyraldehyde dehydrogenase OS=Homo sapiens OX=9606 GN=ALDH9A1 PE=1 SV=3	1	11	11	11	10	10	8	10	9	8	10	10	8	10	9	8	10	10	8	10	9	8	23.7	23.7	23.7	53.801	494	494	3.04	12		28	27	0	33.991	By MS/MS	By MS/MS	By MS/MS	By MS/MS	By MS/MS	By MS/MS	21.5
P49257	P49257	3	3	3	Protein ERGIC-53	LMAN1	>P49257 Protein ERGIC-53 OS=Homo sapiens OX=9606 GN=LMAN1 PE=1 SV=2	1	3	3	3	0	1	0	1	3	1	0	1	0	1	3	1	0	1	0	1	3	1	11	11	11	57.548	510	510	2.33		5		1	0	6.493	By matching	By matching	By matching	By matching	By MS/MS	By matching	0
P49327	P49327	15	15	15	Fatty acid synthase;[Acyl-carrier-protein] S-acetyltransferase;[Acyl-carrier-protein] S-malonyltransferase;3-oxoacyl-[acyl-carrier-protein] synthase;3-oxoacyl-[acyl-carrier-protein] reductase;3-hydroxyacyl-[acyl-carrier-protein] dehydratase;Enoyl-[acyl-carrier-protein] reductase;Oleoyl-[acyl-carrier-protein] hydrolase	FASN	>P49327 Fatty acid synthase OS=Homo sapiens OX=9606 GN=FASN PE=1 SV=3	1	15	15	15	6	4	4	12	12	5	6	4	4	12	12	5	6	4	4	12	12	5	9.4	9.4	9.4	273.42	2511	2511	3.43	3		16	25	0	80.455	By MS/MS	By MS/MS	By MS/MS	By MS/MS	By MS/MS	By MS/MS	3.5
P49354	P49354	4	4	4	Protein farnesyltransferase/geranylgeranyltransferase type-1 subunit alpha	FNTA	>P49354 Protein farnesyltransferase/geranylgeranyltransferase type-1 subunit alpha OS=Homo sapiens OX=9606 GN=FNTA PE=1 SV=1	1	4	4	4	3	4	0	2	2	1	3	4	0	2	2	1	3	4	0	2	2	1	11.6	11.6	11.6	44.408	379	379	3.83			2	10	0	5.7841	By MS/MS	By MS/MS	By matching	By MS/MS	By MS/MS	By matching	8.2
P49356	P49356	2	2	2	Protein farnesyltransferase subunit beta	FNTB	>P49356 Protein farnesyltransferase subunit beta OS=Homo sapiens OX=9606 GN=FNTB PE=1 SV=1	1	2	2	2	1	2	0	1	2	1	1	2	0	1	2	1	1	2	0	1	2	1	5.7	5.7	5.7	48.773	437	437	1	7				0	3.2543	By matching	By MS/MS	By matching	By MS/MS	By MS/MS	By matching	2.1
P49368	P49368	15	15	15	T-complex protein 1 subunit gamma	CCT3	>P49368 T-complex protein 1 subunit gamma OS=Homo sapiens OX=9606 GN=CCT3 PE=1 SV=4	1	15	15	15	11	9	3	12	12	7	11	9	3	12	12	7	11	9	3	12	12	7	32.7	32.7	32.7	60.533	545	545	2.96	6	9	21	19	0	37.265	By MS/MS	By MS/MS	By MS/MS	By MS/MS	By MS/MS	By MS/MS	23.7
P49419	P49419	6	6	6	Alpha-aminoadipic semialdehyde dehydrogenase	ALDH7A1	>P49419 Alpha-aminoadipic semialdehyde dehydrogenase OS=Homo sapiens OX=9606 GN=ALDH7A1 PE=1 SV=5	1	6	6	6	5	6	5	5	5	5	5	6	5	5	5	5	5	6	5	5	5	5	14.8	14.8	14.8	58.486	539	539	2.88	3	12	13	13	0	46.014	By MS/MS	By MS/MS	By MS/MS	By MS/MS	By MS/MS	By MS/MS	12.2
P49588	P49588	5	5	5	Alanine--tRNA ligase, cytoplasmic	AARS	>P49588 Alanine--tRNA ligase, cytoplasmic OS=Homo sapiens OX=9606 GN=AARS PE=1 SV=2	1	5	5	5	3	3	1	3	4	3	3	3	1	3	4	3	3	3	1	3	4	3	6.3	6.3	6.3	106.81	968	968	2.12	4	10		3	0	11.972	By MS/MS	By MS/MS	By matching	By MS/MS	By MS/MS	By MS/MS	4.2
P49591	P49591	7	7	7	Serine--tRNA ligase, cytoplasmic	SARS	>P49591 Serine--tRNA ligase, cytoplasmic OS=Homo sapiens OX=9606 GN=SARS PE=1 SV=3	1	7	7	7	5	5	2	6	6	5	5	5	2	6	6	5	5	5	2	6	6	5	17.7	17.7	17.7	58.777	514	514	3.26	1		26	12	0	55.673	By MS/MS	By MS/MS	By MS/MS	By MS/MS	By MS/MS	By MS/MS	13.6
P49720	P49720	4	4	4	Proteasome subunit beta type-3	PSMB3	>P49720 Proteasome subunit beta type-3 OS=Homo sapiens OX=9606 GN=PSMB3 PE=1 SV=2	1	4	4	4	3	4	2	4	4	4	3	4	2	4	4	4	3	4	2	4	4	4	22.9	22.9	22.9	22.949	205	205	3.11	6		6	15	0	12.149	By MS/MS	By MS/MS	By MS/MS	By MS/MS	By MS/MS	By MS/MS	15.1
P49721	P49721	5	5	5	Proteasome subunit beta type-2	PSMB2	>P49721 Proteasome subunit beta type-2 OS=Homo sapiens OX=9606 GN=PSMB2 PE=1 SV=1	1	5	5	5	4	4	4	3	4	4	4	4	4	3	4	4	4	4	4	3	4	4	26.4	26.4	26.4	22.836	201	201	2.91	2		30	1	0	12.983	By MS/MS	By MS/MS	By MS/MS	By MS/MS	By MS/MS	By MS/MS	22.9
P49746	P49746	5	5	5	Thrombospondin-3	THBS3	>P49746 Thrombospondin-3 OS=Homo sapiens OX=9606 GN=THBS3 PE=1 SV=1	1	5	5	5	5	2	2	1	0	1	5	2	2	1	0	1	5	2	2	1	0	1	6.6	6.6	6.6	104.2	956	956	2.69		4	9		0	28.159	By MS/MS	By MS/MS	By MS/MS	By matching	By matching	By matching	6.6
P49748	P49748	2	2	2	Very long-chain specific acyl-CoA dehydrogenase, mitochondrial	ACADVL	>P49748 Very long-chain specific acyl-CoA dehydrogenase, mitochondrial OS=Homo sapiens OX=9606 GN=ACADVL PE=1 SV=1	1	2	2	2	2	2	1	2	1	2	2	2	1	2	1	2	2	2	1	2	1	2	3.8	3.8	3.8	70.389	655	655	4				10	0.0012353	2.4483	By MS/MS	By matching	By matching	By MS/MS	By matching	By MS/MS	3.8
P49773	P49773	3	3	3	Histidine triad nucleotide-binding protein 1	HINT1	>P49773 Histidine triad nucleotide-binding protein 1 OS=Homo sapiens OX=9606 GN=HINT1 PE=1 SV=2	1	3	3	3	3	3	3	2	3	1	3	3	3	2	3	1	3	3	3	2	3	1	19.8	19.8	19.8	13.802	126	126	2		15			0	6.3967	By MS/MS	By MS/MS	By MS/MS	By matching	By MS/MS	By matching	19.8
P49908	P49908	2	2	2	Selenoprotein P	SEPP1	>P49908 Selenoprotein P OS=Homo sapiens OX=9606 GN=SELENOP PE=1 SV=3	1	2	2	2	1	2	1	1	2	2	1	2	1	1	2	2	1	2	1	1	2	2	4.2	4.2	4.2	43.173	381	381	1.9	6	1	1	2	0.003821	1.7497	By MS/MS	By matching	By matching	By MS/MS	By MS/MS	By MS/MS	2.1
P50213	P50213	3	3	3	Isocitrate dehydrogenase [NAD] subunit alpha, mitochondrial	IDH3A	>P50213 Isocitrate dehydrogenase [NAD] subunit alpha, mitochondrial OS=Homo sapiens OX=9606 GN=IDH3A PE=1 SV=1	1	3	3	3	2	3	2	2	2	3	2	3	2	2	2	3	2	3	2	2	2	3	12	12	12	39.591	366	366	2.14	4	4	6		0	25.036	By MS/MS	By MS/MS	By MS/MS	By MS/MS	By MS/MS	By MS/MS	9.3
P50238	P50238	2	2	2	Cysteine-rich protein 1	CRIP1	>P50238 Cysteine-rich protein 1 OS=Homo sapiens OX=9606 GN=CRIP1 PE=1 SV=3	1	2	2	2	2	1	2	1	1	1	2	1	2	1	1	1	2	1	2	1	1	1	45.5	45.5	45.5	8.5328	77	77	1.75	6			2	0.0023283	2.0914	By MS/MS	By MS/MS	By MS/MS	By MS/MS	By matching	By matching	45.5
P50281	P50281	2	2	2	Matrix metalloproteinase-14	MMP14	>P50281 Matrix metalloproteinase-14 OS=Homo sapiens OX=9606 GN=MMP14 PE=1 SV=3	1	2	2	2	1	0	1	1	2	0	1	0	1	1	2	0	1	0	1	1	2	0	4.3	4.3	4.3	65.893	582	582	3.6		1		4	0	17.655	By MS/MS	By matching	By MS/MS	By MS/MS	By MS/MS	By matching	2.4
P50395	P50395	19	19	14	Rab GDP dissociation inhibitor beta	GDI2	>P50395 Rab GDP dissociation inhibitor beta OS=Homo sapiens OX=9606 GN=GDI2 PE=1 SV=2	1	19	19	14	18	16	14	19	17	15	18	16	14	19	17	15	13	11	9	14	12	10	48.3	48.3	36	50.663	445	445	2.6	28	45	66	33	0	318.59	By MS/MS	By MS/MS	By MS/MS	By MS/MS	By MS/MS	By MS/MS	45.8
P50454	P50454	12	12	12	Serpin H1	SERPINH1	>P50454 Serpin H1 OS=Homo sapiens OX=9606 GN=SERPINH1 PE=1 SV=2	1	12	12	12	9	9	4	11	12	12	9	9	4	11	12	12	9	9	4	11	12	12	34.4	34.4	34.4	46.44	418	418	2.54	21	30	24	26	0	119.61	By MS/MS	By MS/MS	By MS/MS	By MS/MS	By MS/MS	By MS/MS	26.8
P50502;Q8NFI4;Q8IZP2	P50502;Q8NFI4;Q8IZP2	8;6;5	8;6;5	8;6;5	Hsc70-interacting protein;Putative protein FAM10A5;Putative protein FAM10A4	ST13;ST13P5;ST13P4	>P50502 Hsc70-interacting protein OS=Homo sapiens OX=9606 GN=ST13 PE=1 SV=2;>Q8NFI4 Putative protein FAM10A5 OS=Homo sapiens OX=9606 GN=ST13P5 PE=5 SV=1;>Q8IZP2 Putative protein FAM10A4 OS=Homo sapiens OX=9606 GN=ST13P4 PE=5 SV=1	3	8	8	8	7	6	7	7	8	8	7	6	7	7	8	8	7	6	7	7	8	8	25.5	25.5	25.5	41.331	369	369;369;240	2.28	23	20	1	20	0	56.942	By MS/MS	By MS/MS	By MS/MS	By MS/MS	By MS/MS	By MS/MS	23.6
P50552	P50552	2	2	2	Vasodilator-stimulated phosphoprotein	VASP	>P50552 Vasodilator-stimulated phosphoprotein OS=Homo sapiens OX=9606 GN=VASP PE=1 SV=3	1	2	2	2	2	1	2	2	2	2	2	1	2	2	2	2	2	1	2	2	2	2	3.7	3.7	3.7	39.829	380	380	3.55			5	6	0	5.4285	By MS/MS	By MS/MS	By MS/MS	By MS/MS	By MS/MS	By MS/MS	3.7
Q05193;P50570;Q9UQ16	Q05193;P50570;Q9UQ16	2;2;1	2;2;1	2;2;1	Dynamin-1;Dynamin-2;Dynamin-3	DNM1;DNM2;DNM3	>Q05193 Dynamin-1 OS=Homo sapiens OX=9606 GN=DNM1 PE=1 SV=2;>P50570 Dynamin-2 OS=Homo sapiens OX=9606 GN=DNM2 PE=1 SV=2;>Q9UQ16 Dynamin-3 OS=Homo sapiens OX=9606 GN=DNM3 PE=1 SV=4	3	2	2	2	1	2	1	1	2	0	1	2	1	1	2	0	1	2	1	1	2	0	2.4	2.4	2.4	97.407	864	864;870;869	2.71	3			4	0.0033296	1.8569	By MS/MS	By matching	By matching	By MS/MS	By MS/MS	By matching	1.2
P50851;Q8NFP9	P50851;Q8NFP9	2;1	2;1	2;1	Lipopolysaccharide-responsive and beige-like anchor protein;Neurobeachin	LRBA;NBEA	>P50851 Lipopolysaccharide-responsive and beige-like anchor protein OS=Homo sapiens OX=9606 GN=LRBA PE=1 SV=4;>Q8NFP9 Neurobeachin OS=Homo sapiens OX=9606 GN=NBEA PE=1 SV=3	2	2	2	2	0	1	1	1	0	0	0	1	1	1	0	0	0	1	1	1	0	0	0.8	0.8	0.8	319.1	2863	2863;2946	3	1			2	0.00063735	2.7818	By matching	By MS/MS	By matching	By MS/MS	By matching	By matching	0
P50895	P50895	2	2	2	Basal cell adhesion molecule	BCAM	>P50895 Basal cell adhesion molecule OS=Homo sapiens OX=9606 GN=BCAM PE=1 SV=2	1	2	2	2	0	2	0	0	0	0	0	2	0	0	0	0	0	2	0	0	0	0	3.5	3.5	3.5	67.404	628	628	3		1		1	0.0027871	1.8745	By matching	By MS/MS	By matching	By matching	By matching	By matching	0
P50990	P50990	15	15	15	T-complex protein 1 subunit theta	CCT8	>P50990 T-complex protein 1 subunit theta OS=Homo sapiens OX=9606 GN=CCT8 PE=1 SV=4	1	15	15	15	10	13	8	13	10	11	10	13	8	13	10	11	10	13	8	13	10	11	29.7	29.7	29.7	59.62	548	548	2.5	17	19	22	16	0	37.723	By MS/MS	By MS/MS	By MS/MS	By MS/MS	By MS/MS	By MS/MS	19.7
P50991	P50991	12	12	12	T-complex protein 1 subunit delta	CCT4	>P50991 T-complex protein 1 subunit delta OS=Homo sapiens OX=9606 GN=CCT4 PE=1 SV=4	1	12	12	12	9	7	5	6	8	7	9	7	5	6	8	7	9	7	5	6	8	7	30.1	30.1	30.1	57.924	539	539	3.2	7	3	18	28	0	62.374	By MS/MS	By MS/MS	By MS/MS	By MS/MS	By MS/MS	By MS/MS	24.1
P50995	P50995	2	2	2	Annexin A11	ANXA11	>P50995 Annexin A11 OS=Homo sapiens OX=9606 GN=ANXA11 PE=1 SV=1	1	2	2	2	2	1	2	2	1	0	2	1	2	2	1	0	2	1	2	2	1	0	5	5	5	54.389	505	505	2	4		4		0	3.7003	By MS/MS	By MS/MS	By MS/MS	By MS/MS	By MS/MS	By matching	5
P51114;P51116	P51114	3;1	3;1	3;1	Fragile X mental retardation syndrome-related protein 1	FXR1	>P51114 Fragile X mental retardation syndrome-related protein 1 OS=Homo sapiens OX=9606 GN=FXR1 PE=1 SV=3	2	3	3	3	3	1	1	1	1	1	3	1	1	1	1	1	3	1	1	1	1	1	4.2	4.2	4.2	69.72	621	621;673	1.88	1	7			0.00179	2.251	By MS/MS	By matching	By matching	By MS/MS	By MS/MS	By matching	4.2
P51149	P51149	9	9	9	Ras-related protein Rab-7a	RAB7A	>P51149 Ras-related protein Rab-7a OS=Homo sapiens OX=9606 GN=RAB7A PE=1 SV=1	1	9	9	9	5	5	6	6	7	5	5	5	6	6	7	5	5	5	6	6	7	5	53.6	53.6	53.6	23.489	207	207	3.26		6	16	16	0	50.121	By MS/MS	By MS/MS	By MS/MS	By MS/MS	By MS/MS	By MS/MS	31.4
P51452	P51452	2	2	2	Dual specificity protein phosphatase 3	DUSP3	>P51452 Dual specificity protein phosphatase 3 OS=Homo sapiens OX=9606 GN=DUSP3 PE=1 SV=1	1	2	2	2	2	2	0	1	2	1	2	2	0	1	2	1	2	2	0	1	2	1	13.5	13.5	13.5	20.478	185	185	3.77			3	10	0	5.7998	By MS/MS	By MS/MS	By matching	By MS/MS	By MS/MS	By MS/MS	13.5
P51610	P51610	2	2	2	Host cell factor 1;HCF N-terminal chain 1;HCF N-terminal chain 2;HCF N-terminal chain 3;HCF N-terminal chain 4;HCF N-terminal chain 5;HCF N-terminal chain 6;HCF C-terminal chain 1;HCF C-terminal chain 2;HCF C-terminal chain 3;HCF C-terminal chain 4;HCF C-terminal chain 5;HCF C-terminal chain 6	HCFC1	>P51610 Host cell factor 1 OS=Homo sapiens OX=9606 GN=HCFC1 PE=1 SV=2	1	2	2	2	2	2	1	2	2	0	2	2	1	2	2	0	2	2	1	2	2	0	1.3	1.3	1.3	208.73	2035	2035	3.09			10	1	0	3.812	By MS/MS	By MS/MS	By matching	By MS/MS	By MS/MS	By matching	1.3
P51665	P51665	3	3	3	26S proteasome non-ATPase regulatory subunit 7	PSMD7	>P51665 26S proteasome non-ATPase regulatory subunit 7 OS=Homo sapiens OX=9606 GN=PSMD7 PE=1 SV=2	1	3	3	3	3	3	2	3	2	2	3	3	2	3	2	2	3	3	2	3	2	2	9.9	9.9	9.9	37.025	324	324	3.4		3	6	11	0	8.8892	By MS/MS	By MS/MS	By MS/MS	By MS/MS	By MS/MS	By MS/MS	9.9
P51858	P51858	8	8	8	Hepatoma-derived growth factor	HDGF	>P51858 Hepatoma-derived growth factor OS=Homo sapiens OX=9606 GN=HDGF PE=1 SV=1	1	8	8	8	6	5	5	5	6	6	6	5	5	5	6	6	6	5	5	5	6	6	40	40	40	26.788	240	240	1.64	18	9	6		0	36.408	By MS/MS	By MS/MS	By MS/MS	By MS/MS	By MS/MS	By MS/MS	32.1
P51884	P51884	11	11	8	Lumican	LUM	>P51884 Lumican OS=Homo sapiens OX=9606 GN=LUM PE=1 SV=2	1	11	11	8	9	9	10	9	11	9	9	9	10	9	11	9	7	7	8	8	8	8	39.3	39.3	28.4	38.429	338	338	2.59	29	24	39	31	0	221.46	By MS/MS	By MS/MS	By MS/MS	By MS/MS	By MS/MS	By MS/MS	31.7
P51888	P51888	2	2	2	Prolargin	PRELP	>P51888 Prolargin OS=Homo sapiens OX=9606 GN=PRELP PE=1 SV=1	1	2	2	2	0	0	0	0	1	1	0	0	0	0	1	1	0	0	0	0	1	1	6.8	6.8	6.8	43.809	382	382	3.5			1	1	0	3.2358	By matching	By matching	By matching	By matching	By MS/MS	By MS/MS	0
P51911	P51911	7	7	7	Calponin-1	CNN1	>P51911 Calponin-1 OS=Homo sapiens OX=9606 GN=CNN1 PE=1 SV=2	1	7	7	7	6	6	5	6	7	3	6	6	5	6	7	3	6	6	5	6	7	3	23.6	23.6	23.6	33.17	297	297	2.42		22	13	1	0	14.809	By MS/MS	By MS/MS	By MS/MS	By MS/MS	By MS/MS	By MS/MS	20.5
P51991	P51991	7	7	7	Heterogeneous nuclear ribonucleoprotein A3	HNRNPA3	>P51991 Heterogeneous nuclear ribonucleoprotein A3 OS=Homo sapiens OX=9606 GN=HNRNPA3 PE=1 SV=2	1	7	7	7	7	7	7	7	6	7	7	7	7	7	6	7	7	7	7	7	6	7	22.8	22.8	22.8	39.594	378	378	2.32	18	15	12	12	0	79.12	By MS/MS	By MS/MS	By MS/MS	By MS/MS	By MS/MS	By MS/MS	22.8
P52209	P52209	12	12	12	6-phosphogluconate dehydrogenase, decarboxylating	PGD	>P52209 6-phosphogluconate dehydrogenase, decarboxylating OS=Homo sapiens OX=9606 GN=PGD PE=1 SV=3	1	12	12	12	8	7	6	9	12	9	8	7	6	9	12	9	8	7	6	9	12	9	33.7	33.7	33.7	53.139	483	483	2.42	18	15	6	18	0	76.289	By MS/MS	By MS/MS	By MS/MS	By MS/MS	By MS/MS	By MS/MS	20.3
P52272	P52272	3	3	3	Heterogeneous nuclear ribonucleoprotein M	HNRNPM	>P52272 Heterogeneous nuclear ribonucleoprotein M OS=Homo sapiens OX=9606 GN=HNRNPM PE=1 SV=3	1	3	3	3	3	3	1	3	3	3	3	3	1	3	3	3	3	3	1	3	3	3	5.9	5.9	5.9	77.515	730	730	2.74	1	8	5	5	0	8.2027	By MS/MS	By MS/MS	By matching	By MS/MS	By MS/MS	By MS/MS	5.9
P52306	P52306	2	2	2	Rap1 GTPase-GDP dissociation stimulator 1	RAP1GDS1	>P52306 Rap1 GTPase-GDP dissociation stimulator 1 OS=Homo sapiens OX=9606 GN=RAP1GDS1 PE=1 SV=3	1	2	2	2	2	2	1	2	2	0	2	2	1	2	2	0	2	2	1	2	2	0	5.1	5.1	5.1	66.316	607	607	3			9		0	10.144	By matching	By MS/MS	By MS/MS	By matching	By matching	By matching	5.1
P52565	P52565	8	8	8	Rho GDP-dissociation inhibitor 1	ARHGDIA	>P52565 Rho GDP-dissociation inhibitor 1 OS=Homo sapiens OX=9606 GN=ARHGDIA PE=1 SV=3	1	8	8	8	7	8	6	8	7	6	7	8	6	8	7	6	7	8	6	8	7	6	46.6	46.6	46.6	23.207	204	204	1.9	39	16	15	8	0	98.801	By MS/MS	By MS/MS	By MS/MS	By MS/MS	By MS/MS	By MS/MS	40.2
P52566	P52566	5	5	5	Rho GDP-dissociation inhibitor 2	ARHGDIB	>P52566 Rho GDP-dissociation inhibitor 2 OS=Homo sapiens OX=9606 GN=ARHGDIB PE=1 SV=3	1	5	5	5	5	2	2	3	3	2	5	2	2	3	3	2	5	2	2	3	3	2	33.3	33.3	33.3	22.988	201	201	2.68	2	7	5	5	0	9.4998	By MS/MS	By MS/MS	By MS/MS	By MS/MS	By MS/MS	By MS/MS	33.3
P52594	P52594	2	2	2	Arf-GAP domain and FG repeat-containing protein 1	AGFG1	>P52594 Arf-GAP domain and FG repeat-containing protein 1 OS=Homo sapiens OX=9606 GN=AGFG1 PE=1 SV=2	1	2	2	2	1	0	0	0	1	0	1	0	0	0	1	0	1	0	0	0	1	0	5.9	5.9	5.9	58.259	562	562	3.5			1	1	0	5.3204	By MS/MS	By matching	By matching	By matching	By MS/MS	By matching	3.4
P52597	P52597	5	4	4	Heterogeneous nuclear ribonucleoprotein F;Heterogeneous nuclear ribonucleoprotein F, N-terminally processed	HNRNPF	>P52597 Heterogeneous nuclear ribonucleoprotein F OS=Homo sapiens OX=9606 GN=HNRNPF PE=1 SV=3	1	5	4	4	5	1	0	2	5	3	4	0	0	1	4	2	4	0	0	1	4	2	18.6	16.1	16.1	45.671	415	415	2.73	2	4	5	4	0	21.247	By MS/MS	By matching	By matching	By matching	By MS/MS	By matching	18.6
P52758	P52758	2	2	2	Ribonuclease UK114	HRSP12	>P52758 2-iminobutanoate/2-iminopropanoate deaminase OS=Homo sapiens OX=9606 GN=RIDA PE=1 SV=1	1	2	2	2	1	2	2	2	2	2	1	2	2	2	2	2	1	2	2	2	2	2	15.3	15.3	15.3	14.494	137	137	3			11		0	3.814	By MS/MS	By MS/MS	By MS/MS	By MS/MS	By MS/MS	By MS/MS	8
P52788	P52788	4	4	4	Spermine synthase	SMS	>P52788 Spermine synthase OS=Homo sapiens OX=9606 GN=SMS PE=1 SV=2	1	4	4	4	4	3	3	4	4	4	4	3	3	4	4	4	4	3	3	4	4	4	15	15	15	41.268	366	366	2.94	3	6	12	10	0	31.386	By MS/MS	By MS/MS	By MS/MS	By MS/MS	By MS/MS	By MS/MS	15
P52823	P52823	4	4	4	Stanniocalcin-1	STC1	>P52823 Stanniocalcin-1 OS=Homo sapiens OX=9606 GN=STC1 PE=1 SV=1	1	4	4	4	2	2	4	3	4	4	2	2	4	3	4	4	2	2	4	3	4	4	22.3	22.3	22.3	27.621	247	247	2	15	4	1	7	0	135.27	By MS/MS	By matching	By MS/MS	By MS/MS	By MS/MS	By MS/MS	10.5
P52907	P52907	7	6	6	F-actin-capping protein subunit alpha-1	CAPZA1	>P52907 F-actin-capping protein subunit alpha-1 OS=Homo sapiens OX=9606 GN=CAPZA1 PE=1 SV=3	1	7	6	6	7	5	3	4	5	3	6	4	2	3	4	2	6	4	2	3	4	2	44.8	41.3	41.3	32.922	286	286	3.15	3	6	1	16	0	91.296	By MS/MS	By MS/MS	By MS/MS	By MS/MS	By MS/MS	By MS/MS	44.8
P53041	P53041	7	7	7	Serine/threonine-protein phosphatase 5	PPP5C	>P53041 Serine/threonine-protein phosphatase 5 OS=Homo sapiens OX=9606 GN=PPP5C PE=1 SV=1	1	7	7	7	3	4	0	3	6	4	3	4	0	3	6	4	3	4	0	3	6	4	18.6	18.6	18.6	56.878	499	499	2.36	2	12	6	2	0	21.182	By MS/MS	By MS/MS	By matching	By MS/MS	By MS/MS	By MS/MS	8
P53396	P53396	16	16	16	ATP-citrate synthase	ACLY	>P53396 ATP-citrate synthase OS=Homo sapiens OX=9606 GN=ACLY PE=1 SV=3	1	16	16	16	7	12	5	11	14	10	7	12	5	11	14	10	7	12	5	11	14	10	15.9	15.9	15.9	120.84	1101	1101	2.75	16	11	6	28	0	32.427	By MS/MS	By MS/MS	By matching	By MS/MS	By MS/MS	By MS/MS	6.8
P53597	P53597	6	6	6	Succinyl-CoA ligase [ADP/GDP-forming] subunit alpha, mitochondrial	SUCLG1	>P53597 Succinate--CoA ligase [ADP/GDP-forming] subunit alpha, mitochondrial OS=Homo sapiens OX=9606 GN=SUCLG1 PE=1 SV=4	1	6	6	6	4	5	5	6	5	2	4	5	5	6	5	2	4	5	5	6	5	2	18.8	18.8	18.8	36.249	346	346	3.15		6	16	11	0	9.5381	By MS/MS	By MS/MS	By MS/MS	By MS/MS	By MS/MS	By MS/MS	13.3
P53611	P53611	2	2	2	Geranylgeranyl transferase type-2 subunit beta	RABGGTB	>P53611 Geranylgeranyl transferase type-2 subunit beta OS=Homo sapiens OX=9606 GN=RABGGTB PE=1 SV=2	1	2	2	2	2	0	1	0	1	1	2	0	1	0	1	1	2	0	1	0	1	1	6.6	6.6	6.6	36.924	331	331	1.2	4	1			0.0017943	2.2583	By MS/MS	By matching	By MS/MS	By matching	By matching	By matching	6.6
P53618	P53618	10	10	10	Coatomer subunit beta	COPB1	>P53618 Coatomer subunit beta OS=Homo sapiens OX=9606 GN=COPB1 PE=1 SV=3	1	10	10	10	8	7	4	8	8	5	8	7	4	8	8	5	8	7	4	8	8	5	15.3	15.3	15.3	107.14	953	953	2.54	12	9	6	14	0	70.603	By MS/MS	By MS/MS	By MS/MS	By MS/MS	By MS/MS	By MS/MS	12.2
P53621	P53621	8	8	8	Coatomer subunit alpha;Xenin;Proxenin	COPA	>P53621 Coatomer subunit alpha OS=Homo sapiens OX=9606 GN=COPA PE=1 SV=2	1	8	8	8	6	6	5	6	8	5	6	6	5	6	8	5	6	6	5	6	8	5	6.9	6.9	6.9	138.34	1224	1224	2.86	8	6	6	17	0	18.923	By MS/MS	By MS/MS	By MS/MS	By MS/MS	By MS/MS	By MS/MS	5.1
P53634	P53634	4	4	4	Dipeptidyl peptidase 1;Dipeptidyl peptidase 1 exclusion domain chain;Dipeptidyl peptidase 1 heavy chain;Dipeptidyl peptidase 1 light chain	CTSC	>P53634 Dipeptidyl peptidase 1 OS=Homo sapiens OX=9606 GN=CTSC PE=1 SV=2	1	4	4	4	3	2	4	1	3	0	3	2	4	1	3	0	3	2	4	1	3	0	9.7	9.7	9.7	51.853	463	463	3.67		2	2	14	0	9.7945	By MS/MS	By MS/MS	By MS/MS	By matching	By MS/MS	By matching	5.6
P53680	P53680	3	3	3	AP-2 complex subunit sigma	AP2S1	>P53680 AP-2 complex subunit sigma OS=Homo sapiens OX=9606 GN=AP2S1 PE=1 SV=2	1	3	3	3	2	3	1	2	3	2	2	3	1	2	3	2	2	3	1	2	3	2	19	19	19	17.018	142	142	2.23	6		5	2	0	3.8603	By MS/MS	By MS/MS	By matching	By MS/MS	By MS/MS	By MS/MS	10.6
P53999	P53999	3	3	3	Activated RNA polymerase II transcriptional coactivator p15	SUB1	>P53999 Activated RNA polymerase II transcriptional coactivator p15 OS=Homo sapiens OX=9606 GN=SUB1 PE=1 SV=3	1	3	3	3	3	3	3	3	3	3	3	3	3	3	3	3	3	3	3	3	3	3	26	26	26	14.395	127	127	2.52	7	8		10	0	16.186	By MS/MS	By MS/MS	By MS/MS	By MS/MS	By MS/MS	By MS/MS	26
P54136	P54136	5	5	5	Arginine--tRNA ligase, cytoplasmic	RARS	>P54136 Arginine--tRNA ligase, cytoplasmic OS=Homo sapiens OX=9606 GN=RARS PE=1 SV=2	1	5	5	5	4	4	1	2	5	4	4	4	1	2	5	4	4	4	1	2	5	4	7.4	7.4	7.4	75.378	660	660	3.73	2			20	0	5.8035	By MS/MS	By matching	By matching	By MS/MS	By MS/MS	By matching	6.2
P54289	P54289	2	2	2	Voltage-dependent calcium channel subunit alpha-2/delta-1;Voltage-dependent calcium channel subunit alpha-2-1;Voltage-dependent calcium channel subunit delta-1	CACNA2D1	>P54289 Voltage-dependent calcium channel subunit alpha-2/delta-1 OS=Homo sapiens OX=9606 GN=CACNA2D1 PE=1 SV=3	1	2	2	2	1	2	0	0	0	1	1	2	0	0	0	1	1	2	0	0	0	1	1.8	1.8	1.8	124.57	1103	1103	3.25			3	1	0	2.8876	By MS/MS	By MS/MS	By matching	By matching	By matching	By matching	0.7
P54577	P54577	6	6	6	Tyrosine--tRNA ligase, cytoplasmic;Tyrosine--tRNA ligase, cytoplasmic, N-terminally processed	YARS	>P54577 Tyrosine--tRNA ligase, cytoplasmic OS=Homo sapiens OX=9606 GN=YARS PE=1 SV=4	1	6	6	6	5	3	1	5	3	2	5	3	1	5	3	2	5	3	1	5	3	2	11.6	11.6	11.6	59.143	528	528	2.16	7	5	4	3	0	7.4829	By MS/MS	By MS/MS	By MS/MS	By MS/MS	By MS/MS	By MS/MS	9.3
P54578	P54578	4	4	4	Ubiquitin carboxyl-terminal hydrolase 14	USP14	>P54578 Ubiquitin carboxyl-terminal hydrolase 14 OS=Homo sapiens OX=9606 GN=USP14 PE=1 SV=3	1	4	4	4	3	3	2	2	3	2	3	3	2	2	3	2	3	3	2	2	3	2	7.3	7.3	7.3	56.068	494	494	2.29	9	1		7	0	15.464	By MS/MS	By MS/MS	By MS/MS	By MS/MS	By MS/MS	By MS/MS	5.7
P54652	P54652	19	11	9	Heat shock-related 70 kDa protein 2	HSPA2	>P54652 Heat shock-related 70 kDa protein 2 OS=Homo sapiens OX=9606 GN=HSPA2 PE=1 SV=1	1	19	11	9	17	19	15	17	17	17	10	11	8	9	9	9	9	9	7	8	8	8	33.5	20.2	17.2	70.02	639	639	2.83	13	4	28	19	0	36.635	By MS/MS	By MS/MS	By MS/MS	By MS/MS	By MS/MS	By MS/MS	31.1
P54687	P54687	3	3	3	Branched-chain-amino-acid aminotransferase, cytosolic	BCAT1	>P54687 Branched-chain-amino-acid aminotransferase, cytosolic OS=Homo sapiens OX=9606 GN=BCAT1 PE=1 SV=3	1	3	3	3	3	1	3	1	1	1	3	1	3	1	1	1	3	1	3	1	1	1	8	8	8	42.966	386	386	3		5	4	5	0	9.1823	By MS/MS	By matching	By MS/MS	By MS/MS	By MS/MS	By matching	8
P54727	P54727	8	8	5	UV excision repair protein RAD23 homolog B	RAD23B	>P54727 UV excision repair protein RAD23 homolog B OS=Homo sapiens OX=9606 GN=RAD23B PE=1 SV=1	1	8	8	5	8	8	8	8	7	6	8	8	8	8	7	6	5	5	5	5	4	4	18.3	18.3	12	43.171	409	409	2.56	7	26	2	17	0	12.837	By MS/MS	By MS/MS	By MS/MS	By MS/MS	By MS/MS	By MS/MS	18.3
P54802	P54802	2	2	2	Alpha-N-acetylglucosaminidase;Alpha-N-acetylglucosaminidase 82 kDa form;Alpha-N-acetylglucosaminidase 77 kDa form	NAGLU	>P54802 Alpha-N-acetylglucosaminidase OS=Homo sapiens OX=9606 GN=NAGLU PE=1 SV=2	1	2	2	2	1	0	1	0	2	1	1	0	1	0	2	1	1	0	1	0	2	1	3.2	3.2	3.2	82.265	743	743	1.4	4		1		0.0017762	2.2047	By MS/MS	By matching	By matching	By matching	By MS/MS	By MS/MS	2.2
P54819	P54819	3	3	3	Adenylate kinase 2, mitochondrial;Adenylate kinase 2, mitochondrial, N-terminally processed	AK2	>P54819 Adenylate kinase 2, mitochondrial OS=Homo sapiens OX=9606 GN=AK2 PE=1 SV=2	1	3	3	3	1	2	1	3	3	2	1	2	1	3	3	2	1	2	1	3	3	2	14.2	14.2	14.2	26.477	239	239	2.23	6	1	3	3	0	5.8801	By MS/MS	By MS/MS	By MS/MS	By MS/MS	By MS/MS	By MS/MS	4.6
P54886	P54886	2	2	2	Delta-1-pyrroline-5-carboxylate synthase;Glutamate 5-kinase;Gamma-glutamyl phosphate reductase	ALDH18A1	>P54886 Delta-1-pyrroline-5-carboxylate synthase OS=Homo sapiens OX=9606 GN=ALDH18A1 PE=1 SV=2	1	2	2	2	0	1	1	1	1	2	0	1	1	1	1	2	0	1	1	1	1	2	2.9	2.9	2.9	87.301	795	795	3.14		1	4	2	0	2.7841	By matching	By matching	By MS/MS	By MS/MS	By MS/MS	By MS/MS	0
P54920;Q9H115	P54920;Q9H115	2;1	2;1	2;1	Alpha-soluble NSF attachment protein;Beta-soluble NSF attachment protein	NAPA;NAPB	>P54920 Alpha-soluble NSF attachment protein OS=Homo sapiens OX=9606 GN=NAPA PE=1 SV=3;>Q9H115 Beta-soluble NSF attachment protein OS=Homo sapiens OX=9606 GN=NAPB PE=1 SV=2	2	2	2	2	1	2	1	1	1	1	1	2	1	1	1	1	1	2	1	1	1	1	8.8	8.8	8.8	33.232	295	295;298	1.71	2	5			0	3.1376	By matching	By MS/MS	By matching	By MS/MS	By MS/MS	By matching	4.4
P55001	P55001	3	3	3	Microfibrillar-associated protein 2	MFAP2	>P55001 Microfibrillar-associated protein 2 OS=Homo sapiens OX=9606 GN=MFAP2 PE=2 SV=1	1	3	3	3	3	2	2	3	2	2	3	2	2	3	2	2	3	2	2	3	2	2	20.8	20.8	20.8	20.825	183	183	2.74	1	12	2	8	0	13.553	By MS/MS	By MS/MS	By MS/MS	By MS/MS	By MS/MS	By MS/MS	20.8
P55036;A2A3N6	P55036	5;2	5;2	5;2	26S proteasome non-ATPase regulatory subunit 4	PSMD4	>P55036 26S proteasome non-ATPase regulatory subunit 4 OS=Homo sapiens OX=9606 GN=PSMD4 PE=1 SV=1	2	5	5	5	4	4	2	5	4	3	4	4	2	5	4	3	4	4	2	5	4	3	21.2	21.2	21.2	40.736	377	377;862	2.27	6	4	12		0	13.965	By MS/MS	By MS/MS	By MS/MS	By MS/MS	By MS/MS	By matching	16.7
P55058	P55058	7	7	7	Phospholipid transfer protein	PLTP	>P55058 Phospholipid transfer protein OS=Homo sapiens OX=9606 GN=PLTP PE=1 SV=1	1	7	7	7	0	1	0	6	5	6	0	1	0	6	5	6	0	1	0	6	5	6	17.4	17.4	17.4	54.739	493	493	3.12	4	3	3	14	0	58.593	By matching	By MS/MS	By matching	By MS/MS	By MS/MS	By MS/MS	0
P55060	P55060	5	5	5	Exportin-2	CSE1L	>P55060 Exportin-2 OS=Homo sapiens OX=9606 GN=CSE1L PE=1 SV=3	1	5	5	5	3	2	3	2	4	3	3	2	3	2	4	3	3	2	3	2	4	3	6.8	6.8	6.8	110.42	971	971	1.76	11		5	1	0	9.0409	By MS/MS	By MS/MS	By MS/MS	By MS/MS	By MS/MS	By MS/MS	4.2
P55072	P55072	31	31	31	Transitional endoplasmic reticulum ATPase	VCP	>P55072 Transitional endoplasmic reticulum ATPase OS=Homo sapiens OX=9606 GN=VCP PE=1 SV=4	1	31	31	31	29	29	24	29	31	27	29	29	24	29	31	27	29	29	24	29	31	27	48.8	48.8	48.8	89.321	806	806	2.77	49	33	62	80	0	291.75	By MS/MS	By MS/MS	By MS/MS	By MS/MS	By MS/MS	By MS/MS	46.3
P55145	P55145	7	7	7	Mesencephalic astrocyte-derived neurotrophic factor	MANF	>P55145 Mesencephalic astrocyte-derived neurotrophic factor OS=Homo sapiens OX=9606 GN=MANF PE=1 SV=3	1	7	7	7	3	5	4	5	7	4	3	5	4	5	7	4	3	5	4	5	7	4	34.1	34.1	34.1	20.7	182	182	2.26	6	12	12	1	0	28.919	By MS/MS	By MS/MS	By MS/MS	By MS/MS	By MS/MS	By MS/MS	15.4
P55209	P55209	4	4	3	Nucleosome assembly protein 1-like 1	NAP1L1	>P55209 Nucleosome assembly protein 1-like 1 OS=Homo sapiens OX=9606 GN=NAP1L1 PE=1 SV=1	1	4	4	3	3	3	2	3	4	3	3	3	2	3	4	3	2	2	1	2	3	2	14.3	14.3	11.8	45.374	391	391	2.64	4	8	6	7	0	38.023	By MS/MS	By MS/MS	By MS/MS	By MS/MS	By MS/MS	By MS/MS	10
P55263	P55263	3	3	3	Adenosine kinase	ADK	>P55263 Adenosine kinase OS=Homo sapiens OX=9606 GN=ADK PE=1 SV=2	1	3	3	3	3	2	2	2	2	3	3	2	2	2	2	3	3	2	2	2	2	3	7.7	7.7	7.7	40.545	362	362	3.14		6		8	0	4.7957	By MS/MS	By MS/MS	By MS/MS	By MS/MS	By MS/MS	By MS/MS	7.7
P55268	P55268	11	11	11	Laminin subunit beta-2	LAMB2	>P55268 Laminin subunit beta-2 OS=Homo sapiens OX=9606 GN=LAMB2 PE=1 SV=2	1	11	11	11	5	2	9	3	3	8	5	2	9	3	3	8	5	2	9	3	3	8	8.1	8.1	8.1	195.98	1798	1798	2	16	5	6	5	0	26.388	By MS/MS	By MS/MS	By MS/MS	By MS/MS	By MS/MS	By MS/MS	3.2
P55287;Q9ULB5;P55289;P55286	P55287	9;1;1;1	9;1;1;1	9;1;1;1	Cadherin-11	CDH11	>P55287 Cadherin-11 OS=Homo sapiens OX=9606 GN=CDH11 PE=1 SV=2	4	9	9	9	0	0	0	7	9	1	0	0	0	7	9	1	0	0	0	7	9	1	12.9	12.9	12.9	87.964	796	796;785;794;799	2.47	2	9	5	3	0	63.813	By matching	By matching	By matching	By MS/MS	By MS/MS	By matching	0
P55290	P55290	4	4	4	Cadherin-13	CDH13	>P55290 Cadherin-13 OS=Homo sapiens OX=9606 GN=CDH13 PE=1 SV=1	1	4	4	4	2	2	2	3	3	3	2	2	2	3	3	3	2	2	2	3	3	3	6.3	6.3	6.3	78.286	713	713	2.87		7	3	5	0	7.2655	By MS/MS	By MS/MS	By MS/MS	By MS/MS	By MS/MS	By MS/MS	3.6
P55327	P55327	2	2	2	Tumor protein D52	TPD52	>P55327 Tumor protein D52 OS=Homo sapiens OX=9606 GN=TPD52 PE=1 SV=2	1	2	2	2	1	1	1	2	1	1	1	1	1	2	1	1	1	1	1	2	1	1	11.2	11.2	11.2	24.327	224	224	3.92			1	12	0	9.2258	By MS/MS	By MS/MS	By MS/MS	By MS/MS	By MS/MS	By MS/MS	6.7
P55735	P55735	4	4	4	Protein SEC13 homolog	SEC13	>P55735 Protein SEC13 homolog OS=Homo sapiens OX=9606 GN=SEC13 PE=1 SV=3	1	4	4	4	2	3	2	3	3	2	2	3	2	3	3	2	2	3	2	3	3	2	18.9	18.9	18.9	35.54	322	322	2.53		7	8		0	91.709	By MS/MS	By MS/MS	By matching	By MS/MS	By MS/MS	By MS/MS	8.1
P55786;A6NEC2	P55786	20;7	20;7	20;7	Puromycin-sensitive aminopeptidase	NPEPPS	>P55786 Puromycin-sensitive aminopeptidase OS=Homo sapiens OX=9606 GN=NPEPPS PE=1 SV=2	2	20	20	20	19	19	15	17	18	15	19	19	15	17	18	15	19	19	15	17	18	15	23.6	23.6	23.6	103.28	919	919;478	2.57	19	40	39	25	0	87.105	By MS/MS	By MS/MS	By MS/MS	By MS/MS	By MS/MS	By MS/MS	22.6
P55809	P55809	2	2	2	Succinyl-CoA:3-ketoacid coenzyme A transferase 1, mitochondrial	OXCT1	>P55809 Succinyl-CoA:3-ketoacid coenzyme A transferase 1, mitochondrial OS=Homo sapiens OX=9606 GN=OXCT1 PE=1 SV=1	1	2	2	2	0	1	1	0	0	1	0	1	1	0	0	1	0	1	1	0	0	1	4.6	4.6	4.6	56.157	520	520	2		3			0	11.897	By matching	By MS/MS	By MS/MS	By matching	By matching	By MS/MS	0
P55884	P55884	11	11	11	Eukaryotic translation initiation factor 3 subunit B	EIF3B	>P55884 Eukaryotic translation initiation factor 3 subunit B OS=Homo sapiens OX=9606 GN=EIF3B PE=1 SV=3	1	11	11	11	7	10	5	4	7	4	7	10	5	4	7	4	7	10	5	4	7	4	15.4	15.4	15.4	92.48	814	814	2.85	6	11	6	17	0	21.711	By MS/MS	By MS/MS	By MS/MS	By MS/MS	By MS/MS	By MS/MS	10.1
P56192	P56192	3	3	3	Methionine--tRNA ligase, cytoplasmic	MARS	>P56192 Methionine--tRNA ligase, cytoplasmic OS=Homo sapiens OX=9606 GN=MARS PE=1 SV=2	1	3	3	3	0	2	1	1	2	1	0	2	1	1	2	1	0	2	1	1	2	1	3.8	3.8	3.8	101.11	900	900	2.71	1		6		0	5.2652	By matching	By MS/MS	By matching	By MS/MS	By MS/MS	By MS/MS	0
P56537	P56537	4	4	4	Eukaryotic translation initiation factor 6	EIF6	>P56537 Eukaryotic translation initiation factor 6 OS=Homo sapiens OX=9606 GN=EIF6 PE=1 SV=1	1	4	4	4	3	4	2	4	4	3	3	4	2	4	4	3	3	4	2	4	4	3	27.3	27.3	27.3	26.599	245	245	2.95		6	9	5	0	51.103	By MS/MS	By MS/MS	By MS/MS	By MS/MS	By MS/MS	By MS/MS	20
P58215	P58215	2	2	2	Lysyl oxidase homolog 3	LOXL3	>P58215 Lysyl oxidase homolog 3 OS=Homo sapiens OX=9606 GN=LOXL3 PE=1 SV=1	1	2	2	2	0	0	0	1	2	2	0	0	0	1	2	2	0	0	0	1	2	2	4.2	4.2	4.2	83.166	753	753	3.67			2	4	0	9.2274	By matching	By matching	By matching	By matching	By MS/MS	By MS/MS	0
P58397	P58397	5	5	5	A disintegrin and metalloproteinase with thrombospondin motifs 12	ADAMTS12	>P58397 A disintegrin and metalloproteinase with thrombospondin motifs 12 OS=Homo sapiens OX=9606 GN=ADAMTS12 PE=1 SV=2	1	5	5	5	0	0	1	4	4	4	0	0	1	4	4	4	0	0	1	4	4	4	5.1	5.1	5.1	177.67	1594	1594	2.77	3	3	1	6	0	18.505	By matching	By matching	By matching	By MS/MS	By MS/MS	By MS/MS	0
P58546	P58546	3	3	3	Myotrophin	MTPN	>P58546 Myotrophin OS=Homo sapiens OX=9606 GN=MTPN PE=1 SV=2	1	3	3	3	3	3	3	3	3	2	3	3	3	3	3	2	3	3	3	3	3	2	38.1	38.1	38.1	12.895	118	118	1.45	16	13			0	77.502	By MS/MS	By MS/MS	By MS/MS	By MS/MS	By MS/MS	By MS/MS	38.1
P59998	P59998	3	3	3	Actin-related protein 2/3 complex subunit 4	ARPC4	>P59998 Actin-related protein 2/3 complex subunit 4 OS=Homo sapiens OX=9606 GN=ARPC4 PE=1 SV=3	1	3	3	3	2	3	2	2	3	3	2	3	2	2	3	3	2	3	2	2	3	3	17.9	17.9	17.9	19.667	168	168	3.8			3	12	0	12.202	By MS/MS	By MS/MS	By MS/MS	By MS/MS	By MS/MS	By MS/MS	11.3
P60033	P60033	2	2	2	CD81 antigen	CD81	>P60033 CD81 antigen OS=Homo sapiens OX=9606 GN=CD81 PE=1 SV=1	1	2	2	2	0	1	0	1	2	1	0	1	0	1	2	1	0	1	0	1	2	1	18.2	18.2	18.2	25.809	236	236	2.25		7		1	0	50.822	By matching	By MS/MS	By matching	By MS/MS	By MS/MS	By MS/MS	0
P60174	P60174	15	15	15	Triosephosphate isomerase	TPI1	>P60174 Triosephosphate isomerase OS=Homo sapiens OX=9606 GN=TPI1 PE=1 SV=3	1	15	15	15	14	14	15	14	14	14	14	14	15	14	14	14	14	14	15	14	14	14	73.1	73.1	73.1	30.791	286	286	2.61	37	58	53	53	0	319.29	By MS/MS	By MS/MS	By MS/MS	By MS/MS	By MS/MS	By MS/MS	68.2
P60228	P60228	3	3	3	Eukaryotic translation initiation factor 3 subunit E	EIF3E	>P60228 Eukaryotic translation initiation factor 3 subunit E OS=Homo sapiens OX=9606 GN=EIF3E PE=1 SV=1	1	3	3	3	2	3	0	1	1	2	2	3	0	1	1	2	2	3	0	1	1	2	8.8	8.8	8.8	52.22	445	445	2.1	3	5		2	0	5.2046	By MS/MS	By MS/MS	By matching	By MS/MS	By MS/MS	By MS/MS	6.5
P60660;P14649	P60660	6;2	6;2	6;2	Myosin light polypeptide 6	MYL6	>P60660 Myosin light polypeptide 6 OS=Homo sapiens OX=9606 GN=MYL6 PE=1 SV=2	2	6	6	6	6	6	5	6	6	6	6	6	5	6	6	6	6	6	5	6	6	6	43.7	43.7	43.7	16.93	151	151;208	2.49	6	12	23	2	0	29.916	By MS/MS	By MS/MS	By MS/MS	By MS/MS	By MS/MS	By MS/MS	43.7
P60842	P60842	13	5	5	Eukaryotic initiation factor 4A-I	EIF4A1	>P60842 Eukaryotic initiation factor 4A-I OS=Homo sapiens OX=9606 GN=EIF4A1 PE=1 SV=1	1	13	5	5	12	11	10	10	10	12	4	4	3	3	3	4	4	4	3	3	3	4	28.3	11.8	11.8	46.153	406	406	2.66	4	13	1	11	0	24.435	By MS/MS	By MS/MS	By MS/MS	By MS/MS	By MS/MS	By MS/MS	26.1
P60866	P60866	3	3	3	40S ribosomal protein S20	RPS20	>P60866 40S ribosomal protein S20 OS=Homo sapiens OX=9606 GN=RPS20 PE=1 SV=1	1	3	3	3	2	3	2	2	3	1	2	3	2	2	3	1	2	3	2	2	3	1	25.2	25.2	25.2	13.373	119	119	2.74		10	9	4	0	7.6243	By MS/MS	By MS/MS	By MS/MS	By MS/MS	By MS/MS	By matching	19.3
P60900	P60900	12	12	12	Proteasome subunit alpha type-6	PSMA6	>P60900 Proteasome subunit alpha type-6 OS=Homo sapiens OX=9606 GN=PSMA6 PE=1 SV=1	1	12	12	12	10	12	11	12	11	12	10	12	11	12	11	12	10	12	11	12	11	12	54.5	54.5	54.5	27.399	246	246	2.73	17	8	55	16	0	172.56	By MS/MS	By MS/MS	By MS/MS	By MS/MS	By MS/MS	By MS/MS	45.9
P60903	P60903	3	3	3	Protein S100-A10	S100A10	>P60903 Protein S100-A10 OS=Homo sapiens OX=9606 GN=S100A10 PE=1 SV=2	1	3	3	3	3	1	2	1	0	0	3	1	2	1	0	0	3	1	2	1	0	0	35.1	35.1	35.1	11.203	97	97	3.08			11	1	0	9.682	By MS/MS	By matching	By MS/MS	By MS/MS	By matching	By matching	35.1
P60953;P84095;P17081;Q9H4E5	P60953	4;1;1;1	3;0;0;0	3;0;0;0	Cell division control protein 42 homolog	CDC42	>P60953 Cell division control protein 42 homolog OS=Homo sapiens OX=9606 GN=CDC42 PE=1 SV=2	4	4	3	3	4	4	4	4	4	3	3	3	3	3	3	2	3	3	3	3	3	2	25.7	19.9	19.9	21.258	191	191;191;205;214	2.81		5	22		0	9.7805	By MS/MS	By MS/MS	By MS/MS	By MS/MS	By MS/MS	By MS/MS	25.7
P60981	P60981	8	7	7	Destrin	DSTN	>P60981 Destrin OS=Homo sapiens OX=9606 GN=DSTN PE=1 SV=3	1	8	7	7	8	8	6	8	8	6	7	7	5	7	7	5	7	7	5	7	7	5	47.3	43	43	18.506	165	165	2.24	23	1	19	8	0	43.837	By MS/MS	By MS/MS	By MS/MS	By MS/MS	By MS/MS	By MS/MS	47.3
P60983;O60234	P60983	4;1	4;1	4;1	Glia maturation factor beta	GMFB	>P60983 Glia maturation factor beta OS=Homo sapiens OX=9606 GN=GMFB PE=1 SV=2	2	4	4	4	3	2	3	2	2	3	3	2	3	2	2	3	3	2	3	2	2	3	32.4	32.4	32.4	16.713	142	142;142	2.39	2	8	7	1	0	12.855	By MS/MS	By MS/MS	By MS/MS	By MS/MS	By MS/MS	By MS/MS	25.4
P61019	P61019	11	11	5	Ras-related protein Rab-2A	RAB2A	>P61019 Ras-related protein Rab-2A OS=Homo sapiens OX=9606 GN=RAB2A PE=1 SV=1	1	11	11	5	9	10	9	10	11	10	9	10	9	10	11	10	4	5	4	5	5	4	67.5	67.5	32.1	23.545	212	212	2.83	9	29	33	30	0	228.42	By MS/MS	By MS/MS	By MS/MS	By MS/MS	By MS/MS	By MS/MS	55.7
P61020	P61020	5	5	3	Ras-related protein Rab-5B	RAB5B	>P61020 Ras-related protein Rab-5B OS=Homo sapiens OX=9606 GN=RAB5B PE=1 SV=1	1	5	5	3	4	5	4	4	3	4	4	5	4	4	3	4	2	3	2	2	1	2	32.1	32.1	21.9	23.707	215	215	2.93	5	7	3	15	0	16.712	By MS/MS	By MS/MS	By MS/MS	By MS/MS	By MS/MS	By MS/MS	23.3
P61077;P62837	P61077;P62837	2;1	2;1	2;1	Ubiquitin-conjugating enzyme E2 D3;Ubiquitin-conjugating enzyme E2 D2	UBE2D3;UBE2D2	>P61077 Ubiquitin-conjugating enzyme E2 D3 OS=Homo sapiens OX=9606 GN=UBE2D3 PE=1 SV=1;>P62837 Ubiquitin-conjugating enzyme E2 D2 OS=Homo sapiens OX=9606 GN=UBE2D2 PE=1 SV=1	2	2	2	2	2	2	1	1	1	1	2	2	1	1	1	1	2	2	1	1	1	1	12.2	12.2	12.2	16.687	147	147;147	3.25	2			6	0.00063654	2.7744	By MS/MS	By MS/MS	By matching	By MS/MS	By matching	By matching	12.2
P61081	P61081	3	3	3	NEDD8-conjugating enzyme Ubc12	UBE2M	>P61081 NEDD8-conjugating enzyme Ubc12 OS=Homo sapiens OX=9606 GN=UBE2M PE=1 SV=1	1	3	3	3	3	2	0	1	3	0	3	2	0	1	3	0	3	2	0	1	3	0	19.1	19.1	19.1	20.9	183	183	3			9		0	6.4077	By MS/MS	By MS/MS	By matching	By matching	By MS/MS	By matching	19.1
P61086	P61086	4	4	4	Ubiquitin-conjugating enzyme E2 K	UBE2K	>P61086 Ubiquitin-conjugating enzyme E2 K OS=Homo sapiens OX=9606 GN=UBE2K PE=1 SV=3	1	4	4	4	4	4	2	4	4	4	4	4	2	4	4	4	4	4	2	4	4	4	25.5	25.5	25.5	22.406	200	200	2.48	7	6	5	7	0	25.675	By MS/MS	By MS/MS	By MS/MS	By MS/MS	By MS/MS	By MS/MS	25.5
P61088;Q5JXB2	P61088;Q5JXB2	7;4	7;4	7;4	Ubiquitin-conjugating enzyme E2 N;Putative ubiquitin-conjugating enzyme E2 N-like	UBE2N;UBE2NL	>P61088 Ubiquitin-conjugating enzyme E2 N OS=Homo sapiens OX=9606 GN=UBE2N PE=1 SV=1;>Q5JXB2 Putative ubiquitin-conjugating enzyme E2 N-like OS=Homo sapiens OX=9606 GN=UBE2NL PE=1 SV=1	2	7	7	7	6	7	5	6	6	6	6	7	5	6	6	6	6	7	5	6	6	6	52	52	52	17.138	152	152;153	2.95	6	5	11	15	0	21.127	By MS/MS	By MS/MS	By MS/MS	By MS/MS	By MS/MS	By MS/MS	38.8
P61106	P61106	6	6	6	Ras-related protein Rab-14	RAB14	>P61106 Ras-related protein Rab-14 OS=Homo sapiens OX=9606 GN=RAB14 PE=1 SV=4	1	6	6	6	5	5	4	5	4	4	5	5	4	5	4	4	5	5	4	5	4	4	34	34	34	23.897	215	215	2.97	5	1	13	10	0	17.745	By MS/MS	By MS/MS	By MS/MS	By MS/MS	By MS/MS	By MS/MS	29.3
P61158;Q9P1U1;Q9C0K3	P61158	13;3;2	13;3;2	13;3;2	Actin-related protein 3	ACTR3	>P61158 Actin-related protein 3 OS=Homo sapiens OX=9606 GN=ACTR3 PE=1 SV=3	3	13	13	13	10	11	8	9	12	8	10	11	8	9	12	8	10	11	8	9	12	8	41.1	41.1	41.1	47.371	418	418;418;210	2.53	19	12	16	19	0	107.1	By MS/MS	By MS/MS	By MS/MS	By MS/MS	By MS/MS	By MS/MS	32.5
P61160	P61160	7	7	7	Actin-related protein 2	ACTR2	>P61160 Actin-related protein 2 OS=Homo sapiens OX=9606 GN=ACTR2 PE=1 SV=1	1	7	7	7	5	5	3	4	7	4	5	5	3	4	7	4	5	5	3	4	7	4	24.6	24.6	24.6	44.76	394	394	2.64	11		12	10	0	33.738	By MS/MS	By MS/MS	By MS/MS	By MS/MS	By MS/MS	By MS/MS	16.8
P61163	P61163	3	3	2	Alpha-centractin	ACTR1A	>P61163 Alpha-centractin OS=Homo sapiens OX=9606 GN=ACTR1A PE=1 SV=1	1	3	3	2	2	2	0	3	2	0	2	2	0	3	2	0	2	2	0	2	2	0	12.5	12.5	9.8	42.613	376	376	2.44		5	4		0	9.0067	By MS/MS	By MS/MS	By matching	By MS/MS	By MS/MS	By matching	9.8
P61201	P61201	5	5	5	COP9 signalosome complex subunit 2	COPS2	>P61201 COP9 signalosome complex subunit 2 OS=Homo sapiens OX=9606 GN=COPS2 PE=1 SV=1	1	5	5	5	3	4	3	3	3	3	3	4	3	3	3	3	3	4	3	3	3	3	13.5	13.5	13.5	51.596	443	443	2.64	7	3	3	9	0	8.7109	By MS/MS	By MS/MS	By MS/MS	By MS/MS	By MS/MS	By MS/MS	8.4
P84077;P61204	P84077;P61204	7;7	7;7	3;3	ADP-ribosylation factor 1;ADP-ribosylation factor 3	ARF1;ARF3	>P84077 ADP-ribosylation factor 1 OS=Homo sapiens OX=9606 GN=ARF1 PE=1 SV=2;>P61204 ADP-ribosylation factor 3 OS=Homo sapiens OX=9606 GN=ARF3 PE=1 SV=2	2	7	7	3	5	7	5	6	7	6	5	7	5	6	7	6	3	3	3	3	3	3	53.6	53.6	20.4	20.697	181	181;181	3.26	6	8		32	0	55.938	By MS/MS	By MS/MS	By MS/MS	By MS/MS	By MS/MS	By MS/MS	32
P61247	P61247	4	4	4	40S ribosomal protein S3a	RPS3A	>P61247 40S ribosomal protein S3a OS=Homo sapiens OX=9606 GN=RPS3A PE=1 SV=2	1	4	4	4	4	4	1	3	3	1	4	4	1	3	3	1	4	4	1	3	3	1	21.6	21.6	21.6	29.945	264	264	3.32	1	4	2	12	0	20.786	By MS/MS	By MS/MS	By MS/MS	By MS/MS	By MS/MS	By matching	21.6
P61289	P61289	3	3	3	Proteasome activator complex subunit 3	PSME3	>P61289 Proteasome activator complex subunit 3 OS=Homo sapiens OX=9606 GN=PSME3 PE=1 SV=1	1	3	3	3	2	3	2	2	2	2	2	3	2	2	2	2	2	3	2	2	2	2	15	15	15	29.506	254	254	3		6	1	6	0	4.8779	By MS/MS	By MS/MS	By matching	By matching	By MS/MS	By MS/MS	9.1
P61326;Q96A72	P61326;Q96A72	3;3	3;3	3;3	Protein mago nashi homolog;Protein mago nashi homolog 2	MAGOH;MAGOHB	>P61326 Protein mago nashi homolog OS=Homo sapiens OX=9606 GN=MAGOH PE=1 SV=1;>Q96A72 Protein mago nashi homolog 2 OS=Homo sapiens OX=9606 GN=MAGOHB PE=1 SV=1	2	3	3	3	3	3	1	3	3	3	3	3	1	3	3	3	3	3	1	3	3	3	31.5	31.5	31.5	17.163	146	146;148	3.27		5	6	11	0	16.232	By MS/MS	By MS/MS	By MS/MS	By MS/MS	By MS/MS	By MS/MS	31.5
P61353	P61353	3	3	3	60S ribosomal protein L27	RPL27	>P61353 60S ribosomal protein L27 OS=Homo sapiens OX=9606 GN=RPL27 PE=1 SV=2	1	3	3	3	3	1	0	1	2	0	3	1	0	1	2	0	3	1	0	1	2	0	20.6	20.6	20.6	15.798	136	136	3.43		2		5	0	3.3968	By MS/MS	By matching	By matching	By matching	By MS/MS	By matching	20.6
P61457;Q9H0N5	P61457	6;1	6;1	6;1	Pterin-4-alpha-carbinolamine dehydratase	PCBD1	>P61457 Pterin-4-alpha-carbinolamine dehydratase OS=Homo sapiens OX=9606 GN=PCBD1 PE=1 SV=2	2	6	6	6	5	6	6	5	6	6	5	6	6	5	6	6	5	6	6	5	6	6	58.7	58.7	58.7	11.999	104	104;130	2.88	2	8	24	7	0	26.828	By MS/MS	By MS/MS	By MS/MS	By MS/MS	By MS/MS	By MS/MS	43.3
P61586;P08134;P62745	P61586;P08134	5;4;1	5;4;1	5;4;1	Transforming protein RhoA;Rho-related GTP-binding protein RhoC	RHOA;RHOC	>P61586 Transforming protein RhoA OS=Homo sapiens OX=9606 GN=RHOA PE=1 SV=1;>P08134 Rho-related GTP-binding protein RhoC OS=Homo sapiens OX=9606 GN=RHOC PE=1 SV=1	3	5	5	5	5	5	4	5	4	5	5	5	4	5	4	5	5	5	4	5	4	5	32.1	32.1	32.1	21.768	193	193;193;196	2.04	12	20	14		0	70.199	By MS/MS	By MS/MS	By MS/MS	By MS/MS	By MS/MS	By MS/MS	32.1
P61604	P61604	6	6	6	10 kDa heat shock protein, mitochondrial	HSPE1	>P61604 10 kDa heat shock protein, mitochondrial OS=Homo sapiens OX=9606 GN=HSPE1 PE=1 SV=2	1	6	6	6	6	6	6	6	6	5	6	6	6	6	6	5	6	6	6	6	6	5	59.8	59.8	59.8	10.932	102	102	2.74	14	13	9	25	0	27.713	By MS/MS	By MS/MS	By MS/MS	By MS/MS	By MS/MS	By MS/MS	59.8
P61758	P61758	3	3	3	Prefoldin subunit 3	VBP1	>P61758 Prefoldin subunit 3 OS=Homo sapiens OX=9606 GN=VBP1 PE=1 SV=3	1	3	3	3	1	2	1	2	2	3	1	2	1	2	2	3	1	2	1	2	2	3	20.3	20.3	20.3	22.658	197	197	3.64		2		9	0	15.499	By MS/MS	By MS/MS	By MS/MS	By MS/MS	By MS/MS	By MS/MS	9.6
P61764	P61764	5	5	5	Syntaxin-binding protein 1	STXBP1	>P61764 Syntaxin-binding protein 1 OS=Homo sapiens OX=9606 GN=STXBP1 PE=1 SV=1	1	5	5	5	3	4	3	4	4	4	3	4	3	4	4	4	3	4	3	4	4	4	10.9	10.9	10.9	67.568	594	594	2.56	7		18	2	0	9.4434	By MS/MS	By MS/MS	By MS/MS	By MS/MS	By MS/MS	By MS/MS	7.1
P61769	P61769	3	3	3	Beta-2-microglobulin;Beta-2-microglobulin form pI 5.3	B2M	>P61769 Beta-2-microglobulin OS=Homo sapiens OX=9606 GN=B2M PE=1 SV=1	1	3	3	3	3	3	3	3	3	3	3	3	3	3	3	3	3	3	3	3	3	3	35.3	35.3	35.3	13.714	119	119	2.79	1	25	16	15	0	46.137	By MS/MS	By MS/MS	By MS/MS	By MS/MS	By MS/MS	By MS/MS	35.3
P61916	P61916	6	6	6	Epididymal secretory protein E1	NPC2	>P61916 NPC intracellular cholesterol transporter 2 OS=Homo sapiens OX=9606 GN=NPC2 PE=1 SV=1	1	6	6	6	4	5	6	4	5	5	4	5	6	4	5	5	4	5	6	4	5	5	39.7	39.7	39.7	16.57	151	151	1.97	8	17	7		0	34.67	By MS/MS	By MS/MS	By MS/MS	By MS/MS	By MS/MS	By MS/MS	27.8
P61960	P61960	3	3	3	Ubiquitin-fold modifier 1	UFM1	>P61960 Ubiquitin-fold modifier 1 OS=Homo sapiens OX=9606 GN=UFM1 PE=1 SV=1	1	3	3	3	2	2	2	2	3	3	2	2	2	2	3	3	2	2	2	2	3	3	60	60	60	9.1175	85	85	2.5	6	6		8	0	14.557	By MS/MS	By MS/MS	By MS/MS	By MS/MS	By MS/MS	By MS/MS	27.1
P61970	P61970	3	3	3	Nuclear transport factor 2	NUTF2	>P61970 Nuclear transport factor 2 OS=Homo sapiens OX=9606 GN=NUTF2 PE=1 SV=1	1	3	3	3	3	3	3	3	3	2	3	3	3	3	3	2	3	3	3	3	3	2	22.8	22.8	22.8	14.478	127	127	3.75			5	15	0	66.692	By MS/MS	By MS/MS	By MS/MS	By MS/MS	By MS/MS	By MS/MS	22.8
P61978	P61978	12	12	12	Heterogeneous nuclear ribonucleoprotein K	HNRNPK	>P61978 Heterogeneous nuclear ribonucleoprotein K OS=Homo sapiens OX=9606 GN=HNRNPK PE=1 SV=1	1	12	12	12	12	11	9	10	10	9	12	11	9	10	10	9	12	11	9	10	10	9	29.8	29.8	29.8	50.976	463	463	1.72	48	4	12	8	0	92.344	By MS/MS	By MS/MS	By MS/MS	By MS/MS	By MS/MS	By MS/MS	29.8
P61981	P61981	8	4	4	14-3-3 protein gamma;14-3-3 protein gamma, N-terminally processed	YWHAG	>P61981 14-3-3 protein gamma OS=Homo sapiens OX=9606 GN=YWHAG PE=1 SV=2	1	8	4	4	6	8	8	6	8	7	4	4	4	4	4	4	4	4	4	4	4	4	31.6	17.8	17.8	28.302	247	247	1.71	12	17	1	1	0	139.01	By MS/MS	By MS/MS	By MS/MS	By MS/MS	By MS/MS	By MS/MS	25.5
P62136;P36873	P62136;P36873	9;6	9;6	3;0	Serine/threonine-protein phosphatase PP1-alpha catalytic subunit;Serine/threonine-protein phosphatase PP1-gamma catalytic subunit	PPP1CA;PPP1CC	>P62136 Serine/threonine-protein phosphatase PP1-alpha catalytic subunit OS=Homo sapiens OX=9606 GN=PPP1CA PE=1 SV=1;>P36873 Serine/threonine-protein phosphatase PP1-gamma catalytic subunit OS=Homo sapiens OX=9606 GN=PPP1CC PE=1 SV=1	2	9	9	3	8	8	7	7	9	7	8	8	7	7	9	7	3	3	2	3	3	2	33.9	33.9	8.2	37.512	330	330;323	3.13	5	7	17	24	0	47.595	By MS/MS	By MS/MS	By MS/MS	By MS/MS	By MS/MS	By MS/MS	31.2
P62140	P62140	8	2	2	Serine/threonine-protein phosphatase PP1-beta catalytic subunit	PPP1CB	>P62140 Serine/threonine-protein phosphatase PP1-beta catalytic subunit OS=Homo sapiens OX=9606 GN=PPP1CB PE=1 SV=3	1	8	2	2	7	7	7	6	8	7	2	2	2	2	2	2	2	2	2	2	2	2	33	7	7	37.186	327	327	2.5		6	6		0	6.4845	By matching	By MS/MS	By matching	By matching	By matching	By matching	30.3
P62191	P62191	9	9	9	26S protease regulatory subunit 4	PSMC1	>P62191 26S proteasome regulatory subunit 4 OS=Homo sapiens OX=9606 GN=PSMC1 PE=1 SV=1	1	9	9	9	6	8	2	8	9	6	6	8	2	8	9	6	6	8	2	8	9	6	27.5	27.5	27.5	49.184	440	440	3.15		5	23	11	0	65.891	By MS/MS	By MS/MS	By MS/MS	By MS/MS	By MS/MS	By MS/MS	20.2
P62195	P62195	3	3	3	26S protease regulatory subunit 8	PSMC5	>P62195 26S proteasome regulatory subunit 8 OS=Homo sapiens OX=9606 GN=PSMC5 PE=1 SV=1	1	3	3	3	2	3	2	2	2	2	2	3	2	2	2	2	2	3	2	2	2	2	10.6	10.6	10.6	45.626	406	406	2.62	6			7	0	38.928	By MS/MS	By MS/MS	By MS/MS	By MS/MS	By MS/MS	By MS/MS	7.1
P62241	P62241	4	4	4	40S ribosomal protein S8	RPS8	>P62241 40S ribosomal protein S8 OS=Homo sapiens OX=9606 GN=RPS8 PE=1 SV=2	1	4	4	4	3	3	3	2	4	1	3	3	3	2	4	1	3	3	3	2	4	1	24.5	24.5	24.5	24.205	208	208	2.75	5		5	6	0	72.209	By MS/MS	By MS/MS	By MS/MS	By MS/MS	By MS/MS	By MS/MS	18.8
P62244	P62244	3	3	3	40S ribosomal protein S15a	RPS15A	>P62244 40S ribosomal protein S15a OS=Homo sapiens OX=9606 GN=RPS15A PE=1 SV=2	1	3	3	3	3	3	2	3	3	1	3	3	2	3	3	1	3	3	2	3	3	1	23.8	23.8	23.8	14.839	130	130	3.33		5		10	0	10.91	By MS/MS	By MS/MS	By MS/MS	By MS/MS	By MS/MS	By matching	23.8
P62249	P62249	3	3	3	40S ribosomal protein S16	RPS16	>P62249 40S ribosomal protein S16 OS=Homo sapiens OX=9606 GN=RPS16 PE=1 SV=2	1	3	3	3	2	3	1	3	2	2	2	3	1	3	2	2	2	3	1	3	2	2	17.8	17.8	17.8	16.445	146	146	1.71	6	6	2		0	4.2115	By MS/MS	By MS/MS	By matching	By MS/MS	By MS/MS	By MS/MS	12.3
P62258	P62258	17	17	14	14-3-3 protein epsilon	YWHAE	>P62258 14-3-3 protein epsilon OS=Homo sapiens OX=9606 GN=YWHAE PE=1 SV=1	1	17	17	14	15	17	16	15	17	14	15	17	16	15	17	14	14	14	13	14	14	12	69.4	69.4	59.6	29.174	255	255	2.17	97	58	73	35	0	216.74	By MS/MS	By MS/MS	By MS/MS	By MS/MS	By MS/MS	By MS/MS	63.5
P62269	P62269	3	3	3	40S ribosomal protein S18	RPS18	>P62269 40S ribosomal protein S18 OS=Homo sapiens OX=9606 GN=RPS18 PE=1 SV=3	1	3	3	3	3	3	2	3	3	2	3	3	2	3	3	2	3	3	2	3	3	2	19.7	19.7	19.7	17.718	152	152	3.29		1	10	6	0	9.2176	By MS/MS	By MS/MS	By MS/MS	By MS/MS	By MS/MS	By MS/MS	19.7
P62280	P62280	3	3	3	40S ribosomal protein S11	RPS11	>P62280 40S ribosomal protein S11 OS=Homo sapiens OX=9606 GN=RPS11 PE=1 SV=3	1	3	3	3	1	3	1	1	2	2	1	3	1	1	2	2	1	3	1	1	2	2	17.1	17.1	17.1	18.431	158	158	3.8		1		9	0.0017996	2.2784	By MS/MS	By MS/MS	By matching	By MS/MS	By MS/MS	By matching	5.1
P62310	P62310	2	2	2	U6 snRNA-associated Sm-like protein LSm3	LSM3	>P62310 U6 snRNA-associated Sm-like protein LSm3 OS=Homo sapiens OX=9606 GN=LSM3 PE=1 SV=2	1	2	2	2	1	2	1	2	1	1	1	2	1	2	1	1	1	2	1	2	1	1	28.4	28.4	28.4	11.845	102	102	1.33	6	3			0	3.242	By MS/MS	By MS/MS	By matching	By MS/MS	By matching	By matching	7.8
P62316	P62316	2	2	2	Small nuclear ribonucleoprotein Sm D2	SNRPD2	>P62316 Small nuclear ribonucleoprotein Sm D2 OS=Homo sapiens OX=9606 GN=SNRPD2 PE=1 SV=1	1	2	2	2	1	1	0	0	1	0	1	1	0	0	1	0	1	1	0	0	1	0	16.9	16.9	16.9	13.527	118	118	2.67		1	2		0	4.5573	By MS/MS	By MS/MS	By matching	By matching	By MS/MS	By matching	8.5
P62333	P62333	6	6	6	26S protease regulatory subunit 10B	PSMC6	>P62333 26S proteasome regulatory subunit 10B OS=Homo sapiens OX=9606 GN=PSMC6 PE=1 SV=1	1	6	6	6	4	5	2	4	4	3	4	5	2	4	4	3	4	5	2	4	4	3	17	17	17	44.172	389	389	2.46		13	11		0	19.005	By MS/MS	By MS/MS	By matching	By MS/MS	By MS/MS	By MS/MS	10.8
P62424	P62424	3	3	3	60S ribosomal protein L7a	RPL7A	>P62424 60S ribosomal protein L7a OS=Homo sapiens OX=9606 GN=RPL7A PE=1 SV=2	1	3	3	3	2	1	0	0	0	1	2	1	0	0	0	1	2	1	0	0	0	1	15	15	15	29.995	266	266	2.6		3	1	1	0	5.1343	By MS/MS	By MS/MS	By matching	By matching	By matching	By MS/MS	9.4
P62495	P62495	3	3	3	Eukaryotic peptide chain release factor subunit 1	ETF1	>P62495 Eukaryotic peptide chain release factor subunit 1 OS=Homo sapiens OX=9606 GN=ETF1 PE=1 SV=3	1	3	3	3	1	1	1	2	3	1	1	1	1	2	3	1	1	1	1	2	3	1	9.2	9.2	9.2	49.03	437	437	1.78	6	1		2	0	6.2116	By MS/MS	By MS/MS	By matching	By MS/MS	By MS/MS	By matching	3
P62701;P22090;Q8TD47	P62701	6;2;1	6;2;1	6;2;1	40S ribosomal protein S4, X isoform	RPS4X	>P62701 40S ribosomal protein S4, X isoform OS=Homo sapiens OX=9606 GN=RPS4X PE=1 SV=2	3	6	6	6	4	5	5	4	4	4	4	5	5	4	4	4	4	5	5	4	4	4	26.2	26.2	26.2	29.597	263	263;263;263	3.04	6		7	13	0	17.085	By MS/MS	By MS/MS	By MS/MS	By MS/MS	By MS/MS	By MS/MS	17.1
P67775;P62714;P60510	P67775;P62714	3;3;1	3;3;1	3;3;1	Serine/threonine-protein phosphatase 2A catalytic subunit alpha isoform;Serine/threonine-protein phosphatase 2A catalytic subunit beta isoform	PPP2CA;PPP2CB	>P67775 Serine/threonine-protein phosphatase 2A catalytic subunit alpha isoform OS=Homo sapiens OX=9606 GN=PPP2CA PE=1 SV=1;>P62714 Serine/threonine-protein phosphatase 2A catalytic subunit beta isoform OS=Homo sapiens OX=9606 GN=PPP2CB PE=1 SV=1	3	3	3	3	3	1	1	3	3	0	3	1	1	3	3	0	3	1	1	3	3	0	12.9	12.9	12.9	35.594	309	309;309;307	3.36			7	4	0	20.502	By MS/MS	By MS/MS	By MS/MS	By MS/MS	By MS/MS	By matching	12.9
P62750	P62750	2	2	2	60S ribosomal protein L23a	RPL23A	>P62750 60S ribosomal protein L23a OS=Homo sapiens OX=9606 GN=RPL23A PE=1 SV=1	1	2	2	2	2	1	0	1	1	1	2	1	0	1	1	1	2	1	0	1	1	1	15.4	15.4	15.4	17.695	156	156	2		6			0.0012422	2.5139	By MS/MS	By MS/MS	By matching	By matching	By matching	By matching	15.4
P62753	P62753	2	2	2	40S ribosomal protein S6	RPS6	>P62753 40S ribosomal protein S6 OS=Homo sapiens OX=9606 GN=RPS6 PE=1 SV=1	1	2	2	2	1	1	1	2	2	1	1	1	1	2	2	1	1	1	1	2	2	1	9.2	9.2	9.2	28.68	249	249	1.75	2	6			0	9.4211	By MS/MS	By MS/MS	By matching	By MS/MS	By MS/MS	By MS/MS	6
P62805	P62805	5	5	5	Histone H4	HIST1H4A	>P62805 Histone H4 OS=Homo sapiens OX=9606 GN=HIST1H4A PE=1 SV=2	1	5	5	5	3	5	3	5	4	5	3	5	3	5	4	5	3	5	3	5	4	5	46.6	46.6	46.6	11.367	103	103	2.13	22	2	3	12	0	13.33	By MS/MS	By MS/MS	By MS/MS	By MS/MS	By MS/MS	By MS/MS	29.1
P62820;P59190	P62820	9;1	9;1	4;0	Ras-related protein Rab-1A	RAB1A	>P62820 Ras-related protein Rab-1A OS=Homo sapiens OX=9606 GN=RAB1A PE=1 SV=3	2	9	9	4	8	9	6	8	7	6	8	9	6	8	7	6	4	4	3	4	3	4	48.3	48.3	18.5	22.677	205	205;212	2.63	8	15	9	14	0	51.288	By MS/MS	By MS/MS	By MS/MS	By MS/MS	By MS/MS	By MS/MS	39
P62826	P62826	7	7	7	GTP-binding nuclear protein Ran	RAN	>P62826 GTP-binding nuclear protein Ran OS=Homo sapiens OX=9606 GN=RAN PE=1 SV=3	1	7	7	7	7	6	5	6	6	6	7	6	5	6	6	6	7	6	5	6	6	6	38	38	38	24.423	216	216	2.64	7	9	18	8	0	21.36	By MS/MS	By MS/MS	By MS/MS	By MS/MS	By MS/MS	By MS/MS	38
P62851	P62851	3	3	3	40S ribosomal protein S25	RPS25	>P62851 40S ribosomal protein S25 OS=Homo sapiens OX=9606 GN=RPS25 PE=1 SV=1	1	3	3	3	2	3	1	1	3	0	2	3	1	1	3	0	2	3	1	1	3	0	22.4	22.4	22.4	13.742	125	125	3.3			7	3	0	3.6646	By MS/MS	By MS/MS	By matching	By MS/MS	By MS/MS	By matching	14.4
P62854;Q5JNZ5	P62854;Q5JNZ5	3;2	3;2	3;2	40S ribosomal protein S26;Putative 40S ribosomal protein S26-like 1	RPS26;RPS26P11	>P62854 40S ribosomal protein S26 OS=Homo sapiens OX=9606 GN=RPS26 PE=1 SV=3;>Q5JNZ5 Putative 40S ribosomal protein S26-like 1 OS=Homo sapiens OX=9606 GN=RPS26P11 PE=5 SV=1	2	3	3	3	2	2	3	2	2	1	2	2	3	2	2	1	2	2	3	2	2	1	27	27	27	13.015	115	115;115	2.5		6	6		0	5.1043	By MS/MS	By MS/MS	By MS/MS	By MS/MS	By MS/MS	By matching	20.9
P62857	P62857	2	2	2	40S ribosomal protein S28	RPS28	>P62857 40S ribosomal protein S28 OS=Homo sapiens OX=9606 GN=RPS28 PE=1 SV=1	1	2	2	2	2	2	2	2	2	2	2	2	2	2	2	2	2	2	2	2	2	2	30.4	30.4	30.4	7.8409	69	69	1.5	6	6			0	58.95	By MS/MS	By MS/MS	By MS/MS	By MS/MS	By MS/MS	By MS/MS	30.4
P62879	P62879	4	4	2	Guanine nucleotide-binding protein G(I)/G(S)/G(T) subunit beta-2	GNB2	>P62879 Guanine nucleotide-binding protein G(I)/G(S)/G(T) subunit beta-2 OS=Homo sapiens OX=9606 GN=GNB2 PE=1 SV=3	1	4	4	2	2	3	2	2	4	2	2	3	2	2	4	2	0	1	0	0	2	0	14.1	14.1	9.1	37.331	340	340	2.9		8	7	6	0	28.142	By MS/MS	By MS/MS	By MS/MS	By MS/MS	By MS/MS	By MS/MS	5
P62888	P62888	2	2	2	60S ribosomal protein L30	RPL30	>P62888 60S ribosomal protein L30 OS=Homo sapiens OX=9606 GN=RPL30 PE=1 SV=2	1	2	2	2	1	1	1	2	2	1	1	1	1	2	2	1	1	1	1	2	2	1	27	27	27	12.784	115	115	3.78			2	7	0	14.382	By MS/MS	By MS/MS	By MS/MS	By MS/MS	By MS/MS	By MS/MS	10.4
P62906	P62906	5	5	5	60S ribosomal protein L10a	RPL10A	>P62906 60S ribosomal protein L10a OS=Homo sapiens OX=9606 GN=RPL10A PE=1 SV=2	1	5	5	5	5	4	3	4	4	4	5	4	3	4	4	4	5	4	3	4	4	4	27.2	27.2	27.2	24.831	217	217	2.97	6		17	11	0	11.859	By MS/MS	By MS/MS	By MS/MS	By MS/MS	By MS/MS	By MS/MS	27.2
P62937;P0DN26;A0A0B4J2A2;A0A075B759;Q9Y536;F5H284;P0DN37	P62937	8;2;2;2;2;2;1	8;2;2;2;2;2;1	8;2;2;2;2;2;1	Peptidyl-prolyl cis-trans isomerase A;Peptidyl-prolyl cis-trans isomerase A, N-terminally processed	PPIA	>P62937 Peptidyl-prolyl cis-trans isomerase A OS=Homo sapiens OX=9606 GN=PPIA PE=1 SV=2	7	8	8	8	8	8	6	6	8	7	8	8	6	6	8	7	8	8	6	6	8	7	63.6	63.6	63.6	18.012	165	165;164;164;164;164;164;164	2.37	32	24	6	30	0	85.75	By MS/MS	By MS/MS	By MS/MS	By MS/MS	By MS/MS	By MS/MS	63.6
P62942	P62942	5	5	5	Peptidyl-prolyl cis-trans isomerase FKBP1A	FKBP1A	>P62942 Peptidyl-prolyl cis-trans isomerase FKBP1A OS=Homo sapiens OX=9606 GN=FKBP1A PE=1 SV=2	1	5	5	5	4	5	4	4	5	5	4	5	4	4	5	5	4	5	4	4	5	5	41.7	41.7	41.7	11.951	108	108	2.79	1	7	35		0	161.43	By MS/MS	By MS/MS	By MS/MS	By MS/MS	By MS/MS	By MS/MS	40.7
P62993	P62993	3	3	3	Growth factor receptor-bound protein 2	GRB2	>P62993 Growth factor receptor-bound protein 2 OS=Homo sapiens OX=9606 GN=GRB2 PE=1 SV=1	1	3	3	3	2	3	2	3	2	2	2	3	2	3	2	2	2	3	2	3	2	2	17.1	17.1	17.1	25.206	217	217	3.4			9	6	0	7.0449	By MS/MS	By MS/MS	By MS/MS	By MS/MS	By MS/MS	By matching	9.7
P63000;P60763;P15153	P63000;P60763;P15153	6;4;4	6;4;4	5;3;3	Ras-related C3 botulinum toxin substrate 1;Ras-related C3 botulinum toxin substrate 3;Ras-related C3 botulinum toxin substrate 2	RAC1;RAC3;RAC2	>P63000 Ras-related C3 botulinum toxin substrate 1 OS=Homo sapiens OX=9606 GN=RAC1 PE=1 SV=1;>P60763 Ras-related C3 botulinum toxin substrate 3 OS=Homo sapiens OX=9606 GN=RAC3 PE=1 SV=1;>P15153 Ras-related C3 botulinum toxin substrate 2 OS=Homo sapiens OX=	3	6	6	5	6	5	5	5	5	5	6	5	5	5	5	5	5	4	4	4	4	4	38.5	38.5	32.8	21.45	192	192;192;192	2.86		13	14	8	0	37.528	By MS/MS	By MS/MS	By MS/MS	By MS/MS	By MS/MS	By MS/MS	38.5
P63010	P63010	11	11	5	AP-2 complex subunit beta	AP2B1	>P63010 AP-2 complex subunit beta OS=Homo sapiens OX=9606 GN=AP2B1 PE=1 SV=1	1	11	11	5	9	10	5	8	10	7	9	10	5	8	10	7	3	4	1	3	4	2	13.8	13.8	6.4	104.55	937	937	2.87	12	4	17	21	0	24.454	By MS/MS	By MS/MS	By matching	By MS/MS	By MS/MS	By MS/MS	11.3
P63027;Q15836;P23763	P63027;Q15836	3;2;1	3;2;1	3;2;1	Vesicle-associated membrane protein 2;Vesicle-associated membrane protein 3	VAMP2;VAMP3	>P63027 Vesicle-associated membrane protein 2 OS=Homo sapiens OX=9606 GN=VAMP2 PE=1 SV=3;>Q15836 Vesicle-associated membrane protein 3 OS=Homo sapiens OX=9606 GN=VAMP3 PE=1 SV=3	3	3	3	3	2	3	2	2	0	1	2	3	2	2	0	1	2	3	2	2	0	1	34.5	34.5	34.5	12.663	116	116;100;118	1.64	6	7	1		0	33.653	By MS/MS	By MS/MS	By MS/MS	By MS/MS	By matching	By MS/MS	20.7
P63092;Q5JWF2;P11488;P19087;A8MTJ3;P38405	P63092;Q5JWF2	7;7;1;1;1;1	6;6;0;0;0;0	6;6;0;0;0;0	Guanine nucleotide-binding protein G(s) subunit alpha isoforms short;Guanine nucleotide-binding protein G(s) subunit alpha isoforms XLas	GNAS	>P63092 Guanine nucleotide-binding protein G(s) subunit alpha isoforms short OS=Homo sapiens OX=9606 GN=GNAS PE=1 SV=1;>Q5JWF2 Guanine nucleotide-binding protein G(s) subunit alpha isoforms XLas OS=Homo sapiens OX=9606 GN=GNAS PE=1 SV=2	6	7	6	6	5	6	5	6	5	5	4	5	4	5	4	4	4	5	4	5	4	4	18.5	15.7	15.7	45.664	394	394;1037;350;354;354;381	3.03	6	1	8	14	0	11.932	By MS/MS	By MS/MS	By MS/MS	By MS/MS	By MS/MS	By MS/MS	14
P63098	P63098	2	2	2	Calcineurin subunit B type 1	PPP3R1	>P63098 Calcineurin subunit B type 1 OS=Homo sapiens OX=9606 GN=PPP3R1 PE=1 SV=2	1	2	2	2	1	2	0	2	2	0	1	2	0	2	2	0	1	2	0	2	2	0	15.3	15.3	15.3	19.3	170	170	2	3	1	3		0	16.318	By MS/MS	By MS/MS	By matching	By MS/MS	By MS/MS	By matching	5.9
P63104	P63104	14	11	9	14-3-3 protein zeta/delta	YWHAZ	>P63104 14-3-3 protein zeta/delta OS=Homo sapiens OX=9606 GN=YWHAZ PE=1 SV=1	1	14	11	9	12	13	14	12	14	13	11	10	11	11	11	11	9	9	9	9	9	9	52.7	42.4	38.4	27.745	245	245	2.15	29	49	30	8	0	178.96	By MS/MS	By MS/MS	By MS/MS	By MS/MS	By MS/MS	By MS/MS	46.5
P63165	P63165	2	2	2	Small ubiquitin-related modifier 1	SUMO1	>P63165 Small ubiquitin-related modifier 1 OS=Homo sapiens OX=9606 GN=SUMO1 PE=1 SV=1	1	2	2	2	1	1	1	1	2	2	1	1	1	1	2	2	1	1	1	1	2	2	18.8	18.8	18.8	11.557	101	101	3.18			9	2	0	3.6484	By matching	By MS/MS	By matching	By MS/MS	By MS/MS	By MS/MS	11.9
P63208	P63208	5	5	5	S-phase kinase-associated protein 1	SKP1	>P63208 S-phase kinase-associated protein 1 OS=Homo sapiens OX=9606 GN=SKP1 PE=1 SV=2	1	5	5	5	3	3	3	4	5	4	3	3	3	4	5	4	3	3	3	4	5	4	26.4	26.4	26.4	18.658	163	163	2.96	2		18	3	0	17.067	By MS/MS	By MS/MS	By MS/MS	By MS/MS	By MS/MS	By MS/MS	13.5
P63220	P63220	4	4	4	40S ribosomal protein S21	RPS21	>P63220 40S ribosomal protein S21 OS=Homo sapiens OX=9606 GN=RPS21 PE=1 SV=1	1	4	4	4	4	3	1	4	4	3	4	3	1	4	4	3	4	3	1	4	4	3	57.8	57.8	57.8	9.1113	83	83	2.17	5	10	9		0	122.41	By MS/MS	By MS/MS	By MS/MS	By MS/MS	By MS/MS	By MS/MS	57.8
P63241;Q9GZV4;Q6IS14	P63241;Q9GZV4;Q6IS14	6;4;4	6;4;4	6;4;4	Eukaryotic translation initiation factor 5A-1;Eukaryotic translation initiation factor 5A-2;Eukaryotic translation initiation factor 5A-1-like	EIF5A;EIF5A2;EIF5AL1	>P63241 Eukaryotic translation initiation factor 5A-1 OS=Homo sapiens OX=9606 GN=EIF5A PE=1 SV=2;>Q9GZV4 Eukaryotic translation initiation factor 5A-2 OS=Homo sapiens OX=9606 GN=EIF5A2 PE=1 SV=3;>Q6IS14 Eukaryotic translation initiation factor 5A-1-like OS	3	6	6	6	6	5	4	6	6	5	6	5	4	6	6	5	6	5	4	6	6	5	44.8	44.8	44.8	16.832	154	154;153;154	2.32	18	8	19	8	0	62.888	By MS/MS	By MS/MS	By MS/MS	By MS/MS	By MS/MS	By MS/MS	44.8
P63244	P63244	10	10	10	Guanine nucleotide-binding protein subunit beta-2-like 1;Guanine nucleotide-binding protein subunit beta-2-like 1, N-terminally processed	GNB2L1	>P63244 Receptor of activated protein C kinase 1 OS=Homo sapiens OX=9606 GN=RACK1 PE=1 SV=3	1	10	10	10	8	8	5	8	10	4	8	8	5	8	10	4	8	8	5	8	10	4	37.5	37.5	37.5	35.076	317	317	2.76	14	8	5	24	0	46.622	By MS/MS	By MS/MS	By MS/MS	By MS/MS	By MS/MS	By MS/MS	30.6
P63261	P63261	19	19	2	Actin, cytoplasmic 2;Actin, cytoplasmic 2, N-terminally processed	ACTG1	>P63261 Actin, cytoplasmic 2 OS=Homo sapiens OX=9606 GN=ACTG1 PE=1 SV=1	1	19	19	2	18	17	17	17	18	15	18	17	17	17	18	15	2	1	1	2	2	1	68.3	68.3	4.8	41.792	375	375	2.79	45	84	146	97	0	323.31	By MS/MS	By MS/MS	By MS/MS	By MS/MS	By MS/MS	By MS/MS	60.3
P63279	P63279	4	4	4	SUMO-conjugating enzyme UBC9	UBE2I	>P63279 SUMO-conjugating enzyme UBC9 OS=Homo sapiens OX=9606 GN=UBE2I PE=1 SV=1	1	4	4	4	2	4	4	3	4	4	2	4	4	3	4	4	2	4	4	3	4	4	25.9	25.9	25.9	18.007	158	158	4				30	0	48.513	By MS/MS	By MS/MS	By MS/MS	By MS/MS	By MS/MS	By MS/MS	8.2
P67936	P67936	11	11	5	Tropomyosin alpha-4 chain	TPM4	>P67936 Tropomyosin alpha-4 chain OS=Homo sapiens OX=9606 GN=TPM4 PE=1 SV=3	1	11	11	5	10	10	8	10	10	9	10	10	8	10	10	9	5	5	3	4	4	4	45.2	45.2	25	28.521	248	248	1.74	47	20	20	2	0	126.73	By MS/MS	By MS/MS	By MS/MS	By MS/MS	By MS/MS	By MS/MS	42.3
P68036;A0A1B0GUS4	P68036;A0A1B0GUS4	4;2	4;2	4;2	Ubiquitin-conjugating enzyme E2 L3	UBE2L3	>P68036 Ubiquitin-conjugating enzyme E2 L3 OS=Homo sapiens OX=9606 GN=UBE2L3 PE=1 SV=1;>A0A1B0GUS4 Ubiquitin-conjugating enzyme E2 L5 OS=Homo sapiens OX=9606 GN=UBE2L5 PE=2 SV=1	2	4	4	4	3	4	3	4	3	2	3	4	3	4	3	2	3	4	3	4	3	2	27.3	27.3	27.3	17.861	154	154;154	3.18	6			16	0	7.9167	By MS/MS	By MS/MS	By MS/MS	By MS/MS	By MS/MS	By MS/MS	24.7
P68104;Q5VTE0	P68104;Q5VTE0	15;14	15;14	8;7	Elongation factor 1-alpha 1;Putative elongation factor 1-alpha-like 3	EEF1A1;EEF1A1P5	>P68104 Elongation factor 1-alpha 1 OS=Homo sapiens OX=9606 GN=EEF1A1 PE=1 SV=1;>Q5VTE0 Putative elongation factor 1-alpha-like 3 OS=Homo sapiens OX=9606 GN=EEF1A1P5 PE=5 SV=1	2	15	15	8	15	12	12	12	12	11	15	12	12	12	12	11	8	6	6	6	6	6	48.3	48.3	28.1	50.14	462	462;462	3.27	13	12	43	78	0	230	By MS/MS	By MS/MS	By MS/MS	By MS/MS	By MS/MS	By MS/MS	48.3
P68366;Q9H853;A6NHL2	P68366	18;2;2	3;0;0	3;0;0	Tubulin alpha-4A chain	TUBA4A	>P68366 Tubulin alpha-4A chain OS=Homo sapiens OX=9606 GN=TUBA4A PE=1 SV=1	3	18	3	3	17	17	15	15	16	14	3	3	3	2	2	1	3	3	3	2	2	1	52.2	9.8	9.8	49.924	448	448;241;446	2.29	6		11		0	14.147	By MS/MS	By MS/MS	By MS/MS	By matching	By matching	By matching	50.2
P68402	P68402	5	5	5	Platelet-activating factor acetylhydrolase IB subunit beta	PAFAH1B2	>P68402 Platelet-activating factor acetylhydrolase IB subunit beta OS=Homo sapiens OX=9606 GN=PAFAH1B2 PE=1 SV=1	1	5	5	5	4	5	3	4	4	3	4	5	3	4	4	3	4	5	3	4	4	3	27.1	27.1	27.1	25.569	229	229	1.43	16	12			0	45.446	By MS/MS	By MS/MS	By MS/MS	By MS/MS	By MS/MS	By MS/MS	18.8
P69892;P69891	P69892;P69891	4;4	2;2	2;2	Hemoglobin subunit gamma-2;Hemoglobin subunit gamma-1	HBG2;HBG1	>P69892 Hemoglobin subunit gamma-2 OS=Homo sapiens OX=9606 GN=HBG2 PE=1 SV=2;>P69891 Hemoglobin subunit gamma-1 OS=Homo sapiens OX=9606 GN=HBG1 PE=1 SV=2	2	4	2	2	3	3	3	4	3	3	1	1	1	2	1	1	1	1	1	2	1	1	25.9	12.9	12.9	16.126	147	147;147	3.06			16	1	0	7.225	By MS/MS	By MS/MS	By MS/MS	By MS/MS	By MS/MS	By MS/MS	21.8
P78330	P78330	2	2	2	Phosphoserine phosphatase	PSPH	>P78330 Phosphoserine phosphatase OS=Homo sapiens OX=9606 GN=PSPH PE=1 SV=2	1	2	2	2	2	1	0	2	0	1	2	1	0	2	0	1	2	1	0	2	0	1	9.8	9.8	9.8	25.007	225	225	4				6	0.0022753	1.9781	By MS/MS	By matching	By matching	By MS/MS	By matching	By MS/MS	9.8
P78344	P78344	2	2	2	Eukaryotic translation initiation factor 4 gamma 2	EIF4G2	>P78344 Eukaryotic translation initiation factor 4 gamma 2 OS=Homo sapiens OX=9606 GN=EIF4G2 PE=1 SV=1	1	2	2	2	2	2	1	2	2	2	2	2	1	2	2	2	2	2	1	2	2	2	1.9	1.9	1.9	102.36	907	907	4				12	0.0023108	2.0653	By MS/MS	By MS/MS	By matching	By matching	By MS/MS	By matching	1.9
P78371	P78371	15	15	15	T-complex protein 1 subunit beta	CCT2	>P78371 T-complex protein 1 subunit beta OS=Homo sapiens OX=9606 GN=CCT2 PE=1 SV=4	1	15	15	15	14	14	9	13	13	13	14	14	9	13	13	13	14	14	9	13	13	13	40.4	40.4	40.4	57.488	535	535	2.42	38	7	19	29	0	110.5	By MS/MS	By MS/MS	By MS/MS	By MS/MS	By MS/MS	By MS/MS	38.1
P78417	P78417	6	6	6	Glutathione S-transferase omega-1	GSTO1	>P78417 Glutathione S-transferase omega-1 OS=Homo sapiens OX=9606 GN=GSTO1 PE=1 SV=2	1	6	6	6	4	4	2	4	6	5	4	4	2	4	6	5	4	4	2	4	6	5	25.7	25.7	25.7	27.566	241	241	1.64	13	12	3		0	18.541	By MS/MS	By MS/MS	By matching	By MS/MS	By MS/MS	By MS/MS	17.8
P78539	P78539	12	12	12	Sushi repeat-containing protein SRPX	SRPX	>P78539 Sushi repeat-containing protein SRPX OS=Homo sapiens OX=9606 GN=SRPX PE=1 SV=1	1	12	12	12	1	3	1	8	10	11	1	3	1	8	10	11	1	3	1	8	10	11	27.6	27.6	27.6	51.571	464	464	2.35	12	11	13	7	0	48.838	By matching	By MS/MS	By matching	By MS/MS	By MS/MS	By MS/MS	2.2
P80162	P80162	4	3	3	C-X-C motif chemokine 6;Small-inducible cytokine B6, N-processed variant 1;Small-inducible cytokine B6, N-processed variant 2;Small-inducible cytokine B6, N-processed variant 3	CXCL6	>P80162 C-X-C motif chemokine 6 OS=Homo sapiens OX=9606 GN=CXCL6 PE=1 SV=4	1	4	3	3	0	1	1	2	4	3	0	1	1	1	3	2	0	1	1	1	3	2	34.2	27.2	27.2	11.897	114	114	2.6	3	2	1	4	0	7.2887	By matching	By matching	By matching	By MS/MS	By MS/MS	By MS/MS	0
P80303	P80303	12	12	12	Nucleobindin-2;Nesfatin-1	NUCB2	>P80303 Nucleobindin-2 OS=Homo sapiens OX=9606 GN=NUCB2 PE=1 SV=3	1	12	12	12	5	4	5	10	12	4	5	4	5	10	12	4	5	4	5	10	12	4	32.9	32.9	32.9	50.222	420	420	2.56	10	7	21	7	0	121.86	By MS/MS	By MS/MS	By MS/MS	By MS/MS	By MS/MS	By MS/MS	15.7
P80404	P80404	3	3	3	4-aminobutyrate aminotransferase, mitochondrial	ABAT	>P80404 4-aminobutyrate aminotransferase, mitochondrial OS=Homo sapiens OX=9606 GN=ABAT PE=1 SV=3	1	3	3	3	2	2	0	3	2	3	2	2	0	3	2	3	2	2	0	3	2	3	9.4	9.4	9.4	56.438	500	500	1.83	5	4	3		0	41.711	By MS/MS	By MS/MS	By matching	By MS/MS	By MS/MS	By MS/MS	7.2
P80723	P80723	5	5	5	Brain acid soluble protein 1	BASP1	>P80723 Brain acid soluble protein 1 OS=Homo sapiens OX=9606 GN=BASP1 PE=1 SV=2	1	5	5	5	1	1	0	4	5	4	1	1	0	4	5	4	1	1	0	4	5	4	32.6	32.6	32.6	22.693	227	227	1.25	12	4			0	44.666	By MS/MS	By MS/MS	By matching	By MS/MS	By MS/MS	By MS/MS	6.2
P81605	P81605	2	2	2	Dermcidin;Survival-promoting peptide;DCD-1	DCD	>P81605 Dermcidin OS=Homo sapiens OX=9606 GN=DCD PE=1 SV=2	1	2	2	2	2	2	2	1	2	2	2	2	2	1	2	2	2	2	2	1	2	2	20	20	20	11.284	110	110	1	11				0.0048622	1.6922	By MS/MS	By matching	By matching	By MS/MS	By matching	By MS/MS	20
P83110;O43464	P83110	11;1	11;1	11;1	Serine protease HTRA3	HTRA3	>P83110 Serine protease HTRA3 OS=Homo sapiens OX=9606 GN=HTRA3 PE=1 SV=2	2	11	11	11	6	0	1	8	10	6	6	0	1	8	10	6	6	0	1	8	10	6	31.8	31.8	31.8	48.607	453	453;458	3.08	3	4	17	13	0	120.27	By MS/MS	By matching	By matching	By MS/MS	By MS/MS	By MS/MS	16.8
P83916	P83916	3	2	2	Chromobox protein homolog 1	CBX1	>P83916 Chromobox protein homolog 1 OS=Homo sapiens OX=9606 GN=CBX1 PE=1 SV=1	1	3	2	2	2	2	2	3	2	2	1	1	1	2	1	1	1	1	1	2	1	1	21.1	12.4	12.4	21.418	185	185	1.29	6		1		0	3.1836	By matching	By matching	By matching	By MS/MS	By MS/MS	By matching	14.6
P84090	P84090	2	2	2	Enhancer of rudimentary homolog	ERH	>P84090 Enhancer of rudimentary homolog OS=Homo sapiens OX=9606 GN=ERH PE=1 SV=1	1	2	2	2	1	2	1	2	2	2	1	2	1	2	2	2	1	2	1	2	2	2	26.9	26.9	26.9	12.259	104	104	3.09		5		6	0	107.93	By MS/MS	By MS/MS	By MS/MS	By MS/MS	By MS/MS	By MS/MS	10.6
P84098	P84098	3	3	3	60S ribosomal protein L19	RPL19	>P84098 60S ribosomal protein L19 OS=Homo sapiens OX=9606 GN=RPL19 PE=1 SV=1	1	3	3	3	2	0	1	2	2	1	2	0	1	2	2	1	2	0	1	2	2	1	17.3	17.3	17.3	23.466	196	196	2.33	3		6		0	32.206	By MS/MS	By matching	By MS/MS	By MS/MS	By MS/MS	By MS/MS	13.3
P98066	P98066	5	5	5	Tumor necrosis factor-inducible gene 6 protein	TNFAIP6	>P98066 Tumor necrosis factor-inducible gene 6 protein OS=Homo sapiens OX=9606 GN=TNFAIP6 PE=1 SV=2	1	5	5	5	0	1	0	0	1	5	0	1	0	0	1	5	0	1	0	0	1	5	23.1	23.1	23.1	31.203	277	277	3		1	5	1	0	12.219	By matching	By matching	By matching	By matching	By MS/MS	By MS/MS	0
P98095	P98095	21	21	21	Fibulin-2	FBLN2	>P98095 Fibulin-2 OS=Homo sapiens OX=9606 GN=FBLN2 PE=1 SV=2	1	21	21	21	6	0	3	6	20	14	6	0	3	6	20	14	6	0	3	6	20	14	23.1	23.1	23.1	126.57	1184	1184	2.07	17	22	13	4	0	96.826	By MS/MS	By matching	By MS/MS	By MS/MS	By MS/MS	By MS/MS	7.2
P98160	P98160	38	38	38	Basement membrane-specific heparan sulfate proteoglycan core protein;Endorepellin;LG3 peptide	HSPG2	>P98160 Basement membrane-specific heparan sulfate proteoglycan core protein OS=Homo sapiens OX=9606 GN=HSPG2 PE=1 SV=4	1	38	38	38	25	7	27	17	29	24	25	7	27	17	29	24	25	7	27	17	29	24	11	11	11	468.83	4391	4391	2.82	12	42	60	39	0	174.76	By MS/MS	By MS/MS	By MS/MS	By MS/MS	By MS/MS	By MS/MS	7.4
Q00169	Q00169	5	5	5	Phosphatidylinositol transfer protein alpha isoform	PITPNA	>Q00169 Phosphatidylinositol transfer protein alpha isoform OS=Homo sapiens OX=9606 GN=PITPNA PE=1 SV=2	1	5	5	5	4	5	3	4	5	4	4	5	3	4	5	4	4	5	3	4	5	4	21.1	21.1	21.1	31.806	270	270	3.48	2		10	19	0	18.123	By MS/MS	By MS/MS	By matching	By MS/MS	By MS/MS	By MS/MS	14.1
Q00341	Q00341	5	5	5	Vigilin	HDLBP	>Q00341 Vigilin OS=Homo sapiens OX=9606 GN=HDLBP PE=1 SV=2	1	5	5	5	3	0	1	1	4	1	3	0	1	1	4	1	3	0	1	1	4	1	6.2	6.2	6.2	141.45	1268	1268	3.5	1		2	7	0	27.765	By MS/MS	By matching	By matching	By MS/MS	By MS/MS	By matching	3.5
Q00577	Q00577	2	2	2	Transcriptional activator protein Pur-alpha	PURA	>Q00577 Transcriptional activator protein Pur-alpha OS=Homo sapiens OX=9606 GN=PURA PE=1 SV=2	1	2	2	2	2	2	2	1	2	2	2	2	2	1	2	2	2	2	2	1	2	2	5.6	5.6	5.6	34.91	322	322	1.55	5	6			0	3.0044	By MS/MS	By MS/MS	By matching	By matching	By MS/MS	By matching	5.6
Q00610;P53675	Q00610	35;7	35;7	35;7	Clathrin heavy chain 1	CLTC	>Q00610 Clathrin heavy chain 1 OS=Homo sapiens OX=9606 GN=CLTC PE=1 SV=5	2	35	35	35	26	28	26	28	33	28	26	28	26	28	33	28	26	28	26	28	33	28	26.3	26.3	26.3	191.61	1675	1675;1640	2.87	22	50	56	68	0	291.08	By MS/MS	By MS/MS	By MS/MS	By MS/MS	By MS/MS	By MS/MS	20.7
Q00688	Q00688	3	3	3	Peptidyl-prolyl cis-trans isomerase FKBP3	FKBP3	>Q00688 Peptidyl-prolyl cis-trans isomerase FKBP3 OS=Homo sapiens OX=9606 GN=FKBP3 PE=1 SV=1	1	3	3	3	2	2	2	2	2	3	2	2	2	2	2	3	2	2	2	2	2	3	13.4	13.4	13.4	25.177	224	224	3		1	13	1	0	5.114	By MS/MS	By MS/MS	By MS/MS	By MS/MS	By MS/MS	By MS/MS	8.5
Q00839	Q00839	8	8	8	Heterogeneous nuclear ribonucleoprotein U	HNRNPU	>Q00839 Heterogeneous nuclear ribonucleoprotein U OS=Homo sapiens OX=9606 GN=HNRNPU PE=1 SV=6	1	8	8	8	7	7	4	7	7	6	7	7	4	7	7	6	7	7	4	7	7	6	9.8	9.8	9.8	90.583	825	825	2.61	13	5	4	16	0	148.56	By MS/MS	By MS/MS	By MS/MS	By MS/MS	By MS/MS	By MS/MS	9.8
Q15238;Q00887;Q16557;Q00889;Q13046;P11464;Q9UQ74	Q15238;Q00887;Q16557;Q00889;Q13046;P11464;Q9UQ74	2;2;2;2;1;1;1	2;2;2;2;1;1;1	2;2;2;2;1;1;1	Pregnancy-specific beta-1-glycoprotein 5;Pregnancy-specific beta-1-glycoprotein 9;Pregnancy-specific beta-1-glycoprotein 3;Pregnancy-specific beta-1-glycoprotein 6;Putative pregnancy-specific beta-1-glycoprotein 7;Pregnancy-specific beta-1-glycoprotein 1;Pregnancy-specific beta-1-glycoprotein 8	PSG5;PSG9;PSG3;PSG6;PSG7;PSG1;PSG8	>Q15238 Pregnancy-specific beta-1-glycoprotein 5 OS=Homo sapiens OX=9606 GN=PSG5 PE=1 SV=3;>Q00887 Pregnancy-specific beta-1-glycoprotein 9 OS=Homo sapiens OX=9606 GN=PSG9 PE=2 SV=2;>Q16557 Pregnancy-specific beta-1-glycoprotein 3 OS=Homo sapiens OX=9606 G	7	2	2	2	1	2	1	0	0	1	1	2	1	0	0	1	1	2	1	0	0	1	5.7	5.7	5.7	37.713	335	335;426;428;435;419;419;426	1.4	3	2			0	2.7848	By MS/MS	By MS/MS	By MS/MS	By matching	By matching	By matching	3
Q01082;O15020	Q01082	59;1	59;1	59;1	Spectrin beta chain, non-erythrocytic 1	SPTBN1	>Q01082 Spectrin beta chain, non-erythrocytic 1 OS=Homo sapiens OX=9606 GN=SPTBN1 PE=1 SV=2	2	59	59	59	52	44	33	42	45	39	52	44	33	42	45	39	52	44	33	42	45	39	33.5	33.5	33.5	274.61	2364	2364;2390	2.31	73	90	102	31	0	323.31	By MS/MS	By MS/MS	By MS/MS	By MS/MS	By MS/MS	By MS/MS	30.3
Q01105;P0DME0	Q01105;P0DME0	5;4	5;4	5;4	Protein SET;Protein SETSIP	SET;SETSIP	>Q01105 Protein SET OS=Homo sapiens OX=9606 GN=SET PE=1 SV=3;>P0DME0 Protein SETSIP OS=Homo sapiens OX=9606 GN=SETSIP PE=1 SV=1	2	5	5	5	5	5	5	5	5	5	5	5	5	5	5	5	5	5	5	5	5	5	22.8	22.8	22.8	33.488	290	290;302	1.29	35		6		0	137.77	By MS/MS	By MS/MS	By MS/MS	By MS/MS	By MS/MS	By MS/MS	22.8
Q01130	Q01130	2	2	2	Serine/arginine-rich splicing factor 2	SRSF2	>Q01130 Serine/arginine-rich splicing factor 2 OS=Homo sapiens OX=9606 GN=SRSF2 PE=1 SV=4	1	2	2	2	1	1	0	1	2	1	1	1	0	1	2	1	1	1	0	1	2	1	14.9	14.9	14.9	25.476	221	221	1.29	6		1		0	14.145	By MS/MS	By MS/MS	By matching	By MS/MS	By MS/MS	By MS/MS	7.7
Q01469;A8MUU1	Q01469	6;1	6;1	6;1	Fatty acid-binding protein, epidermal	FABP5	>Q01469 Fatty acid-binding protein 5 OS=Homo sapiens OX=9606 GN=FABP5 PE=1 SV=3	2	6	6	6	6	6	6	5	6	6	6	6	6	5	6	6	6	6	6	5	6	6	54.1	54.1	54.1	15.164	135	135;101	2.42	13	6	12	9	0	91.898	By MS/MS	By MS/MS	By MS/MS	By MS/MS	By MS/MS	By MS/MS	54.1
Q01518;P40123	Q01518	15;1	15;1	15;1	Adenylyl cyclase-associated protein 1	CAP1	>Q01518 Adenylyl cyclase-associated protein 1 OS=Homo sapiens OX=9606 GN=CAP1 PE=1 SV=5	2	15	15	15	14	14	9	14	13	10	14	14	9	14	13	10	14	14	9	14	13	10	36	36	36	51.901	475	475;477	2.09	28	47	21	8	0	83.847	By MS/MS	By MS/MS	By MS/MS	By MS/MS	By MS/MS	By MS/MS	34.1
Q01813	Q01813	8	8	7	ATP-dependent 6-phosphofructokinase, platelet type	PFKP	>Q01813 ATP-dependent 6-phosphofructokinase, platelet type OS=Homo sapiens OX=9606 GN=PFKP PE=1 SV=2	1	8	8	7	8	5	4	7	5	2	8	5	4	7	5	2	7	4	3	6	4	1	13.4	13.4	12.2	85.595	784	784	3.06		11	9	13	0	22.705	By MS/MS	By MS/MS	By MS/MS	By MS/MS	By MS/MS	By MS/MS	13.4
Q01995	Q01995	13	13	12	Transgelin	TAGLN	>Q01995 Transgelin OS=Homo sapiens OX=9606 GN=TAGLN PE=1 SV=4	1	13	13	12	12	11	10	12	12	12	12	11	10	12	12	12	11	10	9	11	11	11	59.7	59.7	56.2	22.611	201	201	2.75	39	24	83	52	0	122.44	By MS/MS	By MS/MS	By MS/MS	By MS/MS	By MS/MS	By MS/MS	53.7
Q02218;Q9ULD0	Q02218	5;2	5;2	5;2	2-oxoglutarate dehydrogenase, mitochondrial	OGDH	>Q02218 2-oxoglutarate dehydrogenase, mitochondrial OS=Homo sapiens OX=9606 GN=OGDH PE=1 SV=3	2	5	5	5	1	3	0	2	4	1	1	3	0	2	4	1	1	3	0	2	4	1	6.4	6.4	6.4	115.93	1023	1023;1010	3.36		1	5	5	0	15.616	By matching	By MS/MS	By matching	By MS/MS	By MS/MS	By matching	1.3
Q02252	Q02252	5	5	5	Methylmalonate-semialdehyde dehydrogenase [acylating], mitochondrial	ALDH6A1	>Q02252 Methylmalonate-semialdehyde dehydrogenase [acylating], mitochondrial OS=Homo sapiens OX=9606 GN=ALDH6A1 PE=1 SV=2	1	5	5	5	0	3	1	3	3	1	0	3	1	3	3	1	0	3	1	3	3	1	10.1	10.1	10.1	57.839	535	535	2.75	1	2	8	1	0	7.0005	By matching	By MS/MS	By matching	By MS/MS	By MS/MS	By matching	0
Q02388	Q02388	20	20	20	Collagen alpha-1(VII) chain	COL7A1	>Q02388 Collagen alpha-1(VII) chain OS=Homo sapiens OX=9606 GN=COL7A1 PE=1 SV=2	1	20	20	20	14	11	15	9	13	2	14	11	15	9	13	2	14	11	15	9	13	2	10.8	10.8	10.8	295.22	2944	2944	2.91	11	14	15	30	0	111.59	By MS/MS	By MS/MS	By MS/MS	By MS/MS	By MS/MS	By matching	7
Q02487	Q02487	2	2	2	Desmocollin-2	DSC2	>Q02487 Desmocollin-2 OS=Homo sapiens OX=9606 GN=DSC2 PE=1 SV=1	1	2	2	2	2	2	2	1	0	0	2	2	2	1	0	0	2	2	2	1	0	0	2.7	2.7	2.7	99.961	901	901	1.82	7		3	1	0	25.912	By MS/MS	By MS/MS	By MS/MS	By matching	By matching	By matching	2.7
Q02750	Q02750	3	3	3	Dual specificity mitogen-activated protein kinase kinase 1	MAP2K1	>Q02750 Dual specificity mitogen-activated protein kinase kinase 1 OS=Homo sapiens OX=9606 GN=MAP2K1 PE=1 SV=2	1	3	3	3	1	2	2	3	3	2	1	2	2	3	3	2	1	2	2	3	3	2	5.1	5.1	5.1	43.439	393	393	1.57	7	6	1		0	8.485	By matching	By matching	By MS/MS	By MS/MS	By MS/MS	By matching	2
Q02790	Q02790	4	4	4	Peptidyl-prolyl cis-trans isomerase FKBP4;Peptidyl-prolyl cis-trans isomerase FKBP4, N-terminally processed	FKBP4	>Q02790 Peptidyl-prolyl cis-trans isomerase FKBP4 OS=Homo sapiens OX=9606 GN=FKBP4 PE=1 SV=3	1	4	4	4	4	3	4	3	4	4	4	3	4	3	4	4	4	3	4	3	4	4	9.8	9.8	9.8	51.804	459	459	1.27	16	6			0	14.071	By MS/MS	By MS/MS	By MS/MS	By MS/MS	By MS/MS	By MS/MS	9.8
Q02809	Q02809	21	21	21	Procollagen-lysine,2-oxoglutarate 5-dioxygenase 1	PLOD1	>Q02809 Procollagen-lysine,2-oxoglutarate 5-dioxygenase 1 OS=Homo sapiens OX=9606 GN=PLOD1 PE=1 SV=2	1	21	21	21	12	10	12	17	19	14	12	10	12	17	19	14	12	10	12	17	19	14	38.2	38.2	38.2	83.549	727	727	2.82	21	17	44	38	0	276.84	By MS/MS	By MS/MS	By MS/MS	By MS/MS	By MS/MS	By MS/MS	20.8
Q02818	Q02818	22	22	22	Nucleobindin-1	NUCB1	>Q02818 Nucleobindin-1 OS=Homo sapiens OX=9606 GN=NUCB1 PE=1 SV=4	1	22	22	22	18	17	19	21	21	19	18	17	19	21	21	19	18	17	19	21	21	19	51.6	51.6	51.6	53.879	461	461	2.14	54	49	41	18	0	323.31	By MS/MS	By MS/MS	By MS/MS	By MS/MS	By MS/MS	By MS/MS	44.9
Q02878	Q02878	2	2	2	60S ribosomal protein L6	RPL6	>Q02878 60S ribosomal protein L6 OS=Homo sapiens OX=9606 GN=RPL6 PE=1 SV=3	1	2	2	2	2	0	0	0	2	1	2	0	0	0	2	1	2	0	0	0	2	1	7.3	7.3	7.3	32.728	288	288	3			5		0.002287	2.0178	By MS/MS	By matching	By matching	By matching	By MS/MS	By matching	7.3
Q03154	Q03154	4	4	4	Aminoacylase-1	ACY1	>Q03154 Aminoacylase-1 OS=Homo sapiens OX=9606 GN=ACY1 PE=1 SV=1	1	4	4	4	4	3	4	4	4	4	4	3	4	4	4	4	4	3	4	4	4	4	8.6	8.6	8.6	45.884	408	408	2.54	5	7	6	6	0	5.6976	By MS/MS	By MS/MS	By MS/MS	By MS/MS	By MS/MS	By MS/MS	8.6
Q03252	Q03252	4	4	4	Lamin-B2	LMNB2	>Q03252 Lamin-B2 OS=Homo sapiens OX=9606 GN=LMNB2 PE=1 SV=4	1	4	4	4	2	2	1	2	3	1	2	2	1	2	3	1	2	2	1	2	3	1	6.1	6.1	6.1	69.948	620	620	1.27	8	3			0	4.5563	By MS/MS	By MS/MS	By matching	By MS/MS	By MS/MS	By matching	3.1
Q03405	Q03405	2	2	2	Urokinase plasminogen activator surface receptor	PLAUR	>Q03405 Urokinase plasminogen activator surface receptor OS=Homo sapiens OX=9606 GN=PLAUR PE=1 SV=1	1	2	2	2	0	0	0	1	2	1	0	0	0	1	2	1	0	0	0	1	2	1	10.4	10.4	10.4	36.978	335	335	1.5	3		1		0	29.975	By matching	By matching	By matching	By MS/MS	By MS/MS	By matching	0
Q04446	Q04446	4	4	4	1,4-alpha-glucan-branching enzyme	GBE1	>Q04446 1,4-alpha-glucan-branching enzyme OS=Homo sapiens OX=9606 GN=GBE1 PE=1 SV=3	1	4	4	4	3	4	1	3	2	4	3	4	1	3	2	4	3	4	1	3	2	4	6.1	6.1	6.1	80.473	702	702	1.73	6	16			0	9.3752	By MS/MS	By MS/MS	By matching	By MS/MS	By MS/MS	By MS/MS	4.8
Q04637	Q04637	6	6	6	Eukaryotic translation initiation factor 4 gamma 1	EIF4G1	>Q04637 Eukaryotic translation initiation factor 4 gamma 1 OS=Homo sapiens OX=9606 GN=EIF4G1 PE=1 SV=4	1	6	6	6	4	1	2	3	1	2	4	1	2	3	1	2	4	1	2	3	1	2	4.3	4.3	4.3	175.49	1599	1599	2.08	3	6	4		0	12.004	By MS/MS	By MS/MS	By MS/MS	By MS/MS	By MS/MS	By MS/MS	3.1
Q04760	Q04760	2	2	2	Lactoylglutathione lyase	GLO1	>Q04760 Lactoylglutathione lyase OS=Homo sapiens OX=9606 GN=GLO1 PE=1 SV=4	1	2	2	2	1	1	1	2	2	2	1	1	1	2	2	2	1	1	1	2	2	2	10.3	10.3	10.3	20.777	184	184	2	6			3	0.0012338	2.4412	By matching	By MS/MS	By MS/MS	By MS/MS	By matching	By MS/MS	4.9
Q04828;P52895;P42330;P17516	Q04828;P52895	5;3;2;1	5;3;2;1	5;3;2;1	Aldo-keto reductase family 1 member C1;Aldo-keto reductase family 1 member C2	AKR1C1;AKR1C2	>Q04828 Aldo-keto reductase family 1 member C1 OS=Homo sapiens OX=9606 GN=AKR1C1 PE=1 SV=1;>P52895 Aldo-keto reductase family 1 member C2 OS=Homo sapiens OX=9606 GN=AKR1C2 PE=1 SV=3	4	5	5	5	0	0	0	1	5	1	0	0	0	1	5	1	0	0	0	1	5	1	23.8	23.8	23.8	36.788	323	323;323;323;323	3.75			2	6	0	13.344	By matching	By matching	By matching	By matching	By MS/MS	By matching	0
Q04837	Q04837	2	2	2	Single-stranded DNA-binding protein, mitochondrial	SSBP1	>Q04837 Single-stranded DNA-binding protein, mitochondrial OS=Homo sapiens OX=9606 GN=SSBP1 PE=1 SV=1	1	2	2	2	0	1	1	1	2	2	0	1	1	1	2	2	0	1	1	1	2	2	15.5	15.5	15.5	17.259	148	148	1.71	2	5			0.001771	2.1826	By matching	By matching	By matching	By matching	By MS/MS	By matching	0
Q04917	Q04917	13	10	10	14-3-3 protein eta	YWHAH	>Q04917 14-3-3 protein eta OS=Homo sapiens OX=9606 GN=YWHAH PE=1 SV=4	1	13	10	10	10	12	10	8	11	9	9	9	7	7	8	7	9	9	7	7	8	7	53.7	43.5	43.5	28.218	246	246	1.52	31	21	4		0	83.125	By MS/MS	By MS/MS	By MS/MS	By MS/MS	By MS/MS	By MS/MS	44.7
Q05639	Q05639	10	3	3	Elongation factor 1-alpha 2	EEF1A2	>Q05639 Elongation factor 1-alpha 2 OS=Homo sapiens OX=9606 GN=EEF1A2 PE=1 SV=1	1	10	3	3	10	9	8	9	9	8	3	3	2	3	3	3	3	3	2	3	3	3	27	6.9	6.9	50.47	463	463	3.07		14		16	0	17.844	By MS/MS	By MS/MS	By MS/MS	By MS/MS	By MS/MS	By MS/MS	27
Q05682	Q05682	10	10	10	Caldesmon	CALD1	>Q05682 Caldesmon OS=Homo sapiens OX=9606 GN=CALD1 PE=1 SV=3	1	10	10	10	9	7	4	10	10	8	9	7	4	10	10	8	9	7	4	10	10	8	15	15	15	93.23	793	793	1.7	29	12	13		0	28.165	By MS/MS	By MS/MS	By MS/MS	By MS/MS	By MS/MS	By MS/MS	13.6
Q05707	Q05707	8	8	8	Collagen alpha-1(XIV) chain	COL14A1	>Q05707 Collagen alpha-1(XIV) chain OS=Homo sapiens OX=9606 GN=COL14A1 PE=1 SV=3	1	8	8	8	6	8	5	5	7	7	6	8	5	5	7	7	6	8	5	5	7	7	4.8	4.8	4.8	193.51	1796	1796	3.16		7	28	15	0	24.025	By MS/MS	By MS/MS	By MS/MS	By MS/MS	By MS/MS	By MS/MS	3.5
Q06124	Q06124	5	5	5	Tyrosine-protein phosphatase non-receptor type 11	PTPN11	>Q06124 Tyrosine-protein phosphatase non-receptor type 11 OS=Homo sapiens OX=9606 GN=PTPN11 PE=1 SV=2	1	5	5	5	3	3	2	5	4	2	3	3	2	5	4	2	3	3	2	5	4	2	8.4	8.4	8.4	68.436	597	597	2.3	6	2	12		0	8.6576	By MS/MS	By MS/MS	By matching	By MS/MS	By MS/MS	By matching	4.7
Q06210	Q06210	9	9	7	Glutamine--fructose-6-phosphate aminotransferase [isomerizing] 1	GFPT1	>Q06210 Glutamine--fructose-6-phosphate aminotransferase [isomerizing] 1 OS=Homo sapiens OX=9606 GN=GFPT1 PE=1 SV=3	1	9	9	7	6	5	1	3	5	3	6	5	1	3	5	3	5	4	1	3	4	3	16.5	16.5	12.3	78.806	699	699	2.09	9	4	9	1	0	15.956	By MS/MS	By MS/MS	By MS/MS	By MS/MS	By MS/MS	By matching	12.2
Q06278	Q06278	2	2	2	Aldehyde oxidase	AOX1	>Q06278 Aldehyde oxidase OS=Homo sapiens OX=9606 GN=AOX1 PE=1 SV=2	1	2	2	2	1	1	2	1	2	2	1	1	2	1	2	2	1	1	2	1	2	2	1.4	1.4	1.4	147.92	1338	1338	4				10	0.0027886	1.8777	By matching	By matching	By MS/MS	By MS/MS	By MS/MS	By MS/MS	0.6
Q06323	Q06323	9	9	9	Proteasome activator complex subunit 1	PSME1	>Q06323 Proteasome activator complex subunit 1 OS=Homo sapiens OX=9606 GN=PSME1 PE=1 SV=1	1	9	9	9	8	8	6	9	9	8	8	8	6	9	9	8	8	8	6	9	9	8	38.2	38.2	38.2	28.723	249	249	2.47	19	10	21	14	0	27.566	By MS/MS	By MS/MS	By MS/MS	By MS/MS	By MS/MS	By MS/MS	33.3
Q06481	Q06481	5	4	4	Amyloid-like protein 2	APLP2	>Q06481 Amyloid-like protein 2 OS=Homo sapiens OX=9606 GN=APLP2 PE=1 SV=2	1	5	4	4	3	2	5	1	3	3	3	2	4	1	2	3	3	2	4	1	2	3	6.6	5.5	5.5	86.955	763	763	2	7	2	7		0	5.079	By MS/MS	By MS/MS	By MS/MS	By matching	By MS/MS	By MS/MS	4.3
Q06828	Q06828	5	5	5	Fibromodulin	FMOD	>Q06828 Fibromodulin OS=Homo sapiens OX=9606 GN=FMOD PE=1 SV=2	1	5	5	5	2	3	2	2	5	3	2	3	2	2	5	3	2	3	2	2	5	3	20.2	20.2	20.2	43.178	376	376	2.93		12	5	10	0	82.448	By MS/MS	By MS/MS	By MS/MS	By MS/MS	By MS/MS	By MS/MS	6.1
Q06830	Q06830	13	13	9	Peroxiredoxin-1	PRDX1	>Q06830 Peroxiredoxin-1 OS=Homo sapiens OX=9606 GN=PRDX1 PE=1 SV=1	1	13	13	9	11	13	11	12	12	12	11	13	11	12	12	12	7	9	8	8	8	8	60.3	60.3	47.2	22.11	199	199	2.46	30	32	52	20	0	107.61	By MS/MS	By MS/MS	By MS/MS	By MS/MS	By MS/MS	By MS/MS	55.3
Q07020	Q07020	4	4	4	60S ribosomal protein L18	RPL18	>Q07020 60S ribosomal protein L18 OS=Homo sapiens OX=9606 GN=RPL18 PE=1 SV=2	1	4	4	4	3	3	3	3	3	2	3	3	3	3	3	2	3	3	3	3	3	2	25	25	25	21.634	188	188	3	1	6	5	8	0	16.596	By MS/MS	By MS/MS	By MS/MS	By MS/MS	By MS/MS	By MS/MS	19.7
Q07021	Q07021	3	3	3	Complement component 1 Q subcomponent-binding protein, mitochondrial	C1QBP	>Q07021 Complement component 1 Q subcomponent-binding protein, mitochondrial OS=Homo sapiens OX=9606 GN=C1QBP PE=1 SV=1	1	3	3	3	1	1	1	1	3	1	1	1	1	1	3	1	1	1	1	1	3	1	13.8	13.8	13.8	31.362	282	282	2.88		1	7		0	7.822	By MS/MS	By MS/MS	By matching	By MS/MS	By MS/MS	By MS/MS	3.9
Q07092	Q07092	2	2	2	Collagen alpha-1(XVI) chain	COL16A1	>Q07092 Collagen alpha-1(XVI) chain OS=Homo sapiens OX=9606 GN=COL16A1 PE=1 SV=2	1	2	2	2	0	0	0	2	2	2	0	0	0	2	2	2	0	0	0	2	2	2	1.4	1.4	1.4	157.75	1604	1604	2	3		3		0	3.71	By matching	By matching	By matching	By MS/MS	By MS/MS	By MS/MS	0
Q07157	Q07157	2	2	2	Tight junction protein ZO-1	TJP1	>Q07157 Tight junction protein ZO-1 OS=Homo sapiens OX=9606 GN=TJP1 PE=1 SV=3	1	2	2	2	2	0	0	0	1	1	2	0	0	0	1	1	2	0	0	0	1	1	1.9	1.9	1.9	195.46	1748	1748	4				4	0	4.2495	By MS/MS	By matching	By matching	By matching	By matching	By matching	1.9
Q07666	Q07666	3	3	3	KH domain-containing, RNA-binding, signal transduction-associated protein 1	KHDRBS1	>Q07666 KH domain-containing, RNA-binding, signal transduction-associated protein 1 OS=Homo sapiens OX=9606 GN=KHDRBS1 PE=1 SV=1	1	3	3	3	3	2	1	2	3	1	3	2	1	2	3	1	3	2	1	2	3	1	10.8	10.8	10.8	48.227	443	443	2.62		9		4	0	36.092	By MS/MS	By MS/MS	By matching	By MS/MS	By MS/MS	By MS/MS	10.8
Q07812	Q07812	2	2	2	Apoptosis regulator BAX	BAX	>Q07812 Apoptosis regulator BAX OS=Homo sapiens OX=9606 GN=BAX PE=1 SV=1	1	2	2	2	1	2	0	1	0	1	1	2	0	1	0	1	1	2	0	1	0	1	13.5	13.5	13.5	21.184	192	192	1	5				0	3.2581	By MS/MS	By MS/MS	By matching	By MS/MS	By matching	By MS/MS	6.8
Q07954	Q07954	12	12	12	Prolow-density lipoprotein receptor-related protein 1;Low-density lipoprotein receptor-related protein 1 85 kDa subunit;Low-density lipoprotein receptor-related protein 1 515 kDa subunit;Low-density lipoprotein receptor-related protein 1 intracellular domain	LRP1	>Q07954 Prolow-density lipoprotein receptor-related protein 1 OS=Homo sapiens OX=9606 GN=LRP1 PE=1 SV=2	1	12	12	12	3	5	4	5	11	10	3	5	4	5	11	10	3	5	4	5	11	10	3.1	3.1	3.1	504.6	4544	4544	2.95	1	13	14	13	0	27.824	By MS/MS	By matching	By MS/MS	By MS/MS	By MS/MS	By MS/MS	0.9
Q07955	Q07955	4	4	4	Serine/arginine-rich splicing factor 1	SRSF1	>Q07955 Serine/arginine-rich splicing factor 1 OS=Homo sapiens OX=9606 GN=SRSF1 PE=1 SV=2	1	4	4	4	3	2	0	2	4	1	3	2	0	2	4	1	3	2	0	2	4	1	17.7	17.7	17.7	27.744	248	248	1.92	5	3	4		0	6.4082	By MS/MS	By MS/MS	By matching	By MS/MS	By MS/MS	By MS/MS	14.5
Q07960	Q07960	3	3	3	Rho GTPase-activating protein 1	ARHGAP1	>Q07960 Rho GTPase-activating protein 1 OS=Homo sapiens OX=9606 GN=ARHGAP1 PE=1 SV=1	1	3	3	3	2	2	1	2	3	1	2	2	1	2	3	1	2	2	1	2	3	1	7.5	7.5	7.5	50.435	439	439	2.82	4		1	6	0	4.8873	By MS/MS	By MS/MS	By matching	By MS/MS	By MS/MS	By matching	4.8
Q08174	Q08174	2	2	2	Protocadherin-1	PCDH1	>Q08174 Protocadherin-1 OS=Homo sapiens OX=9606 GN=PCDH1 PE=1 SV=2	1	2	2	2	2	0	0	0	0	0	2	0	0	0	0	0	2	0	0	0	0	0	2.4	2.4	2.4	114.74	1060	1060	1.5	1	1			0	3.8143	By MS/MS	By matching	By matching	By matching	By matching	By matching	2.4
Q08211	Q08211	3	3	3	ATP-dependent RNA helicase A	DHX9	>Q08211 ATP-dependent RNA helicase A OS=Homo sapiens OX=9606 GN=DHX9 PE=1 SV=4	1	3	3	3	1	2	0	0	3	2	1	2	0	0	3	2	1	2	0	0	3	2	4	4	4	140.96	1270	1270	2.5		4	4		0	16.831	By MS/MS	By MS/MS	By matching	By matching	By MS/MS	By MS/MS	1
Q08257	Q08257	7	7	7	Quinone oxidoreductase	CRYZ	>Q08257 Quinone oxidoreductase OS=Homo sapiens OX=9606 GN=CRYZ PE=1 SV=1	1	7	7	7	6	5	5	4	4	5	6	5	5	4	4	5	6	5	5	4	4	5	26.4	26.4	26.4	35.206	329	329	2.76		18	6	10	0	27.536	By MS/MS	By MS/MS	By MS/MS	By MS/MS	By MS/MS	By MS/MS	22.2
Q08380	Q08380	13	13	13	Galectin-3-binding protein	LGALS3BP	>Q08380 Galectin-3-binding protein OS=Homo sapiens OX=9606 GN=LGALS3BP PE=1 SV=1	1	13	13	13	11	5	5	12	13	12	11	5	5	12	13	12	11	5	5	12	13	12	27.7	27.7	27.7	65.33	585	585	3.09	7	14	28	36	0	323.31	By MS/MS	By MS/MS	By MS/MS	By MS/MS	By MS/MS	By MS/MS	26.2
Q08397	Q08397	5	5	5	Lysyl oxidase homolog 1	LOXL1	>Q08397 Lysyl oxidase homolog 1 OS=Homo sapiens OX=9606 GN=LOXL1 PE=1 SV=2	1	5	5	5	0	1	0	1	1	5	0	1	0	1	1	5	0	1	0	1	1	5	13.9	13.9	13.9	63.109	574	574	3.5		1	2	5	0	26.42	By matching	By MS/MS	By matching	By MS/MS	By matching	By MS/MS	0
Q08431	Q08431	14	14	14	Lactadherin;Lactadherin short form;Medin	MFGE8	>Q08431 Lactadherin OS=Homo sapiens OX=9606 GN=MFGE8 PE=1 SV=2	1	14	14	14	7	5	10	13	13	13	7	5	10	13	13	13	7	5	10	13	13	13	44.2	44.2	44.2	43.122	387	387	3.02	16	5	31	39	0	175.38	By MS/MS	By MS/MS	By MS/MS	By MS/MS	By MS/MS	By MS/MS	22.2
Q08629;Q9BQ16	Q08629	15;1	15;1	15;1	Testican-1	SPOCK1	>Q08629 Testican-1 OS=Homo sapiens OX=9606 GN=SPOCK1 PE=1 SV=1	2	15	15	15	2	5	2	13	15	13	2	5	2	13	15	13	2	5	2	13	15	13	40.1	40.1	40.1	49.124	439	439;436	2.81	12	11	25	22	0	139.54	By matching	By MS/MS	By MS/MS	By MS/MS	By MS/MS	By MS/MS	3.9
Q08752	Q08752	5	5	5	Peptidyl-prolyl cis-trans isomerase D	PPID	>Q08752 Peptidyl-prolyl cis-trans isomerase D OS=Homo sapiens OX=9606 GN=PPID PE=1 SV=3	1	5	5	5	5	4	3	3	3	3	5	4	3	3	3	3	5	4	3	3	3	3	12.4	12.4	12.4	40.763	370	370	3.14	3	3	4	12	0	6.8613	By MS/MS	By MS/MS	By MS/MS	By MS/MS	By MS/MS	By MS/MS	12.4
Q08ET2;O15389	Q08ET2;O15389	7;5	7;5	7;5	Sialic acid-binding Ig-like lectin 14;Sialic acid-binding Ig-like lectin 5	SIGLEC14;SIGLEC5	>Q08ET2 Sialic acid-binding Ig-like lectin 14 OS=Homo sapiens OX=9606 GN=SIGLEC14 PE=1 SV=1;>O15389 Sialic acid-binding Ig-like lectin 5 OS=Homo sapiens OX=9606 GN=SIGLEC5 PE=1 SV=1	2	7	7	7	0	0	7	0	0	0	0	0	7	0	0	0	0	0	7	0	0	0	19.2	19.2	19.2	43.97	396	396;551	2.77	1	4	5	3	0	55.307	By matching	By matching	By MS/MS	By matching	By matching	By matching	0
Q09028;Q16576	Q09028;Q16576	2;1	2;1	2;1	Histone-binding protein RBBP4;Histone-binding protein RBBP7	RBBP4;RBBP7	>Q09028 Histone-binding protein RBBP4 OS=Homo sapiens OX=9606 GN=RBBP4 PE=1 SV=3;>Q16576 Histone-binding protein RBBP7 OS=Homo sapiens OX=9606 GN=RBBP7 PE=1 SV=1	2	2	2	2	0	1	0	1	2	0	0	1	0	1	2	0	0	1	0	1	2	0	4.5	4.5	4.5	47.655	425	425;425	1.75	3			1	0	3.7677	By matching	By matching	By matching	By matching	By MS/MS	By matching	0
Q09666	Q09666	24	24	24	Neuroblast differentiation-associated protein AHNAK	AHNAK	>Q09666 Neuroblast differentiation-associated protein AHNAK OS=Homo sapiens OX=9606 GN=AHNAK PE=1 SV=2	1	24	24	24	22	10	5	12	14	1	22	10	5	12	14	1	22	10	5	12	14	1	11.6	11.6	11.6	629.09	5890	5890	1.89	28	30	4	8	0	58.751	By MS/MS	By MS/MS	By MS/MS	By MS/MS	By MS/MS	By MS/MS	11.1
Q10471	Q10471	9	9	9	Polypeptide N-acetylgalactosaminyltransferase 2;Polypeptide N-acetylgalactosaminyltransferase 2 soluble form	GALNT2	>Q10471 Polypeptide N-acetylgalactosaminyltransferase 2 OS=Homo sapiens OX=9606 GN=GALNT2 PE=1 SV=1	1	9	9	9	7	3	4	6	9	6	7	3	4	6	9	6	7	3	4	6	9	6	17.7	17.7	17.7	64.732	571	571	2.44	9	10	14	6	0	30.595	By MS/MS	By MS/MS	By MS/MS	By MS/MS	By MS/MS	By MS/MS	12.4
Q10567	Q10567	10	4	4	AP-1 complex subunit beta-1	AP1B1	>Q10567 AP-1 complex subunit beta-1 OS=Homo sapiens OX=9606 GN=AP1B1 PE=1 SV=2	1	10	4	4	6	10	4	6	6	6	0	4	0	1	0	1	0	4	0	1	0	1	12.5	5.3	5.3	104.64	949	949	2.5		5	2	1	0	14.367	By matching	By MS/MS	By matching	By MS/MS	By matching	By MS/MS	7.3
Q12765	Q12765	3	3	3	Secernin-1	SCRN1	>Q12765 Secernin-1 OS=Homo sapiens OX=9606 GN=SCRN1 PE=1 SV=2	1	3	3	3	3	1	1	3	2	2	3	1	1	3	2	2	3	1	1	3	2	2	10.4	10.4	10.4	46.382	414	414	2.75	2		14		0	4.5105	By MS/MS	By MS/MS	By matching	By MS/MS	By MS/MS	By MS/MS	10.4
Q12792	Q12792	3	2	2	Twinfilin-1	TWF1	>Q12792 Twinfilin-1 OS=Homo sapiens OX=9606 GN=TWF1 PE=1 SV=3	1	3	2	2	2	2	2	2	3	2	1	1	1	1	2	1	1	1	1	1	2	1	11.1	9.1	9.1	40.282	350	350	1.29	6		1		0	25.03	By matching	By matching	By MS/MS	By MS/MS	By MS/MS	By MS/MS	5.7
Q12805	Q12805	14	14	14	EGF-containing fibulin-like extracellular matrix protein 1	EFEMP1	>Q12805 EGF-containing fibulin-like extracellular matrix protein 1 OS=Homo sapiens OX=9606 GN=EFEMP1 PE=1 SV=2	1	14	14	14	5	4	8	11	11	12	5	4	8	11	11	12	5	4	8	11	11	12	39.6	39.6	39.6	54.64	493	493	2.05	41	12	5	20	0	243.48	By MS/MS	By MS/MS	By MS/MS	By MS/MS	By MS/MS	By MS/MS	16
Q12841	Q12841	13	13	13	Follistatin-related protein 1	FSTL1	>Q12841 Follistatin-related protein 1 OS=Homo sapiens OX=9606 GN=FSTL1 PE=1 SV=1	1	13	13	13	11	10	11	11	11	12	11	10	11	11	11	12	11	10	11	11	11	12	46.4	46.4	46.4	34.985	308	308	2.14	38	55	25	16	0	323.31	By MS/MS	By MS/MS	By MS/MS	By MS/MS	By MS/MS	By MS/MS	38.3
Q12874	Q12874	2	2	2	Splicing factor 3A subunit 3	SF3A3	>Q12874 Splicing factor 3A subunit 3 OS=Homo sapiens OX=9606 GN=SF3A3 PE=1 SV=1	1	2	2	2	2	1	0	2	2	1	2	1	0	2	2	1	2	1	0	2	2	1	4.2	4.2	4.2	58.848	501	501	2.62		3	5		0	4.6225	By MS/MS	By MS/MS	By matching	By MS/MS	By MS/MS	By MS/MS	4.2
Q12884	Q12884	6	6	6	Seprase	FAP	>Q12884 Prolyl endopeptidase FAP OS=Homo sapiens OX=9606 GN=FAP PE=1 SV=5	1	6	6	6	0	0	0	0	5	2	0	0	0	0	5	2	0	0	0	0	5	2	8.6	8.6	8.6	87.711	760	760	2.86		3	2	2	0	12.732	By matching	By matching	By matching	By matching	By MS/MS	By MS/MS	0
Q12904	Q12904	3	3	3	Aminoacyl tRNA synthase complex-interacting multifunctional protein 1;Endothelial monocyte-activating polypeptide 2	AIMP1	>Q12904 Aminoacyl tRNA synthase complex-interacting multifunctional protein 1 OS=Homo sapiens OX=9606 GN=AIMP1 PE=1 SV=2	1	3	3	3	3	3	2	3	3	3	3	3	2	3	3	3	3	3	2	3	3	3	13.5	13.5	13.5	34.352	312	312	3.39			11	7	0	18.871	By MS/MS	By MS/MS	By MS/MS	By MS/MS	By MS/MS	By MS/MS	13.5
Q12905	Q12905	8	8	8	Interleukin enhancer-binding factor 2	ILF2	>Q12905 Interleukin enhancer-binding factor 2 OS=Homo sapiens OX=9606 GN=ILF2 PE=1 SV=2	1	8	8	8	5	4	3	5	7	6	5	4	3	5	7	6	5	4	3	5	7	6	30.5	30.5	30.5	43.062	390	390	2.03	18	4	7	6	0	19.964	By MS/MS	By MS/MS	By MS/MS	By MS/MS	By MS/MS	By MS/MS	15.9
Q12906	Q12906	7	7	7	Interleukin enhancer-binding factor 3	ILF3	>Q12906 Interleukin enhancer-binding factor 3 OS=Homo sapiens OX=9606 GN=ILF3 PE=1 SV=3	1	7	7	7	5	2	3	2	6	4	5	2	3	2	6	4	5	2	3	2	6	4	8.5	8.5	8.5	95.337	894	894	2.32	7	1	14		0	17.213	By MS/MS	By MS/MS	By MS/MS	By MS/MS	By MS/MS	By MS/MS	5.3
Q12907	Q12907	5	5	5	Vesicular integral-membrane protein VIP36	LMAN2	>Q12907 Vesicular integral-membrane protein VIP36 OS=Homo sapiens OX=9606 GN=LMAN2 PE=1 SV=1	1	5	5	5	2	0	2	3	4	3	2	0	2	3	4	3	2	0	2	3	4	3	21.1	21.1	21.1	40.228	356	356	2.79		4	9	1	0	13.166	By MS/MS	By matching	By MS/MS	By MS/MS	By MS/MS	By MS/MS	9.3
Q12931	Q12931	2	2	2	Heat shock protein 75 kDa, mitochondrial	TRAP1	>Q12931 Heat shock protein 75 kDa, mitochondrial OS=Homo sapiens OX=9606 GN=TRAP1 PE=1 SV=3	1	2	2	2	1	2	0	1	1	0	1	2	0	1	1	0	1	2	0	1	1	0	3.1	3.1	3.1	80.109	704	704	1.8	2	2	1		0.0017964	2.2614	By MS/MS	By matching	By matching	By MS/MS	By MS/MS	By matching	1.7
Q12959;Q15700;Q92796	Q12959;Q15700	3;2;1	3;2;1	3;2;1	Disks large homolog 1;Disks large homolog 2	DLG1;DLG2	>Q12959 Disks large homolog 1 OS=Homo sapiens OX=9606 GN=DLG1 PE=1 SV=2;>Q15700 Disks large homolog 2 OS=Homo sapiens OX=9606 GN=DLG2 PE=1 SV=3	3	3	3	3	3	3	2	3	2	3	3	3	2	3	2	3	3	3	2	3	2	3	4.5	4.5	4.5	100.45	904	904;870;817	2.31	5	6		5	0	8.5356	By MS/MS	By MS/MS	By MS/MS	By MS/MS	By MS/MS	By MS/MS	4.5
Q13098	Q13098	4	4	4	COP9 signalosome complex subunit 1	GPS1	>Q13098 COP9 signalosome complex subunit 1 OS=Homo sapiens OX=9606 GN=GPS1 PE=1 SV=4	1	4	4	4	3	4	1	4	4	2	3	4	1	4	4	2	3	4	1	4	4	2	10.2	10.2	10.2	55.536	491	491	3.28		4	5	9	0	22.386	By MS/MS	By MS/MS	By MS/MS	By MS/MS	By MS/MS	By MS/MS	8.6
Q13126	Q13126	6	6	6	S-methyl-5-thioadenosine phosphorylase	MTAP	>Q13126 S-methyl-5-thioadenosine phosphorylase OS=Homo sapiens OX=9606 GN=MTAP PE=1 SV=2	1	6	6	6	4	3	3	4	5	3	4	3	3	4	5	3	4	3	3	4	5	3	26.5	26.5	26.5	31.236	283	283	2.65	7		10	6	0	25.072	By MS/MS	By MS/MS	By MS/MS	By MS/MS	By MS/MS	By MS/MS	20.1
Q13151	Q13151	2	2	2	Heterogeneous nuclear ribonucleoprotein A0	HNRNPA0	>Q13151 Heterogeneous nuclear ribonucleoprotein A0 OS=Homo sapiens OX=9606 GN=HNRNPA0 PE=1 SV=1	1	2	2	2	1	2	0	0	1	0	1	2	0	0	1	0	1	2	0	0	1	0	13.4	13.4	13.4	30.84	305	305	3.25			3	1	0	4.2509	By MS/MS	By MS/MS	By matching	By matching	By matching	By matching	6.6
Q13162	Q13162	7	4	4	Peroxiredoxin-4	PRDX4	>Q13162 Peroxiredoxin-4 OS=Homo sapiens OX=9606 GN=PRDX4 PE=1 SV=1	1	7	4	4	6	6	5	5	6	6	3	3	3	2	3	3	3	3	3	2	3	3	28	18.8	18.8	30.54	271	271	2.95		12	19	10	0	27.472	By MS/MS	By MS/MS	By MS/MS	By MS/MS	By MS/MS	By MS/MS	22.1
Q13177;Q13153;O75914	Q13177	5;2;2	5;2;2	5;2;2	Serine/threonine-protein kinase PAK 2;PAK-2p27;PAK-2p34	PAK2	>Q13177 Serine/threonine-protein kinase PAK 2 OS=Homo sapiens OX=9606 GN=PAK2 PE=1 SV=3	3	5	5	5	3	4	2	4	3	3	3	4	2	4	3	3	3	4	2	4	3	3	11.1	11.1	11.1	58.042	524	524;545;559	2.38	8	5		8	0	6.1567	By MS/MS	By MS/MS	By MS/MS	By MS/MS	By MS/MS	By MS/MS	6.5
Q13185	Q13185	4	4	3	Chromobox protein homolog 3	CBX3	>Q13185 Chromobox protein homolog 3 OS=Homo sapiens OX=9606 GN=CBX3 PE=1 SV=4	1	4	4	3	3	3	4	4	4	3	3	3	4	4	4	3	2	2	3	3	3	2	22.4	22.4	13.7	20.811	183	183	1.72	19			6	0	13.783	By MS/MS	By MS/MS	By MS/MS	By MS/MS	By MS/MS	By MS/MS	22.4
Q13200	Q13200	13	13	13	26S proteasome non-ATPase regulatory subunit 2	PSMD2	>Q13200 26S proteasome non-ATPase regulatory subunit 2 OS=Homo sapiens OX=9606 GN=PSMD2 PE=1 SV=3	1	13	13	13	9	9	3	7	7	7	9	9	3	7	7	7	9	9	3	7	7	7	19.5	19.5	19.5	100.2	908	908	2.98	5	9	15	18	0	60.115	By MS/MS	By MS/MS	By MS/MS	By MS/MS	By MS/MS	By MS/MS	13.5
Q13217	Q13217	3	3	3	DnaJ homolog subfamily C member 3	DNAJC3	>Q13217 DnaJ homolog subfamily C member 3 OS=Homo sapiens OX=9606 GN=DNAJC3 PE=1 SV=1	1	3	3	3	0	2	0	3	3	3	0	2	0	3	3	3	0	2	0	3	3	3	8.5	8.5	8.5	57.579	504	504	2.42	5		4	3	0	6.9776	By matching	By MS/MS	By matching	By MS/MS	By MS/MS	By MS/MS	0
Q13219	Q13219	36	36	36	Pappalysin-1	PAPPA	>Q13219 Pappalysin-1 OS=Homo sapiens OX=9606 GN=PAPPA PE=1 SV=3	1	36	36	36	7	4	0	27	36	26	7	4	0	27	36	26	7	4	0	27	36	26	30.2	30.2	30.2	180.97	1627	1627	2.69	20	34	60	29	0	323.31	By MS/MS	By matching	By matching	By MS/MS	By MS/MS	By MS/MS	4.7
Q13228	Q13228	2	2	2	Selenium-binding protein 1	SELENBP1	>Q13228 Methanethiol oxidase OS=Homo sapiens OX=9606 GN=SELENBP1 PE=1 SV=2	1	2	2	2	1	1	2	2	2	2	1	1	2	2	2	2	1	1	2	2	2	2	4.7	4.7	4.7	52.39	472	472	3			10		0	3.5753	By matching	By matching	By matching	By MS/MS	By matching	By MS/MS	3
Q13263	Q13263	3	3	3	Transcription intermediary factor 1-beta	TRIM28	>Q13263 Transcription intermediary factor 1-beta OS=Homo sapiens OX=9606 GN=TRIM28 PE=1 SV=5	1	3	3	3	3	3	2	2	2	2	3	3	2	2	2	2	3	3	2	2	2	2	3.7	3.7	3.7	88.549	835	835	1.87	6	7		2	0	10.517	By MS/MS	By MS/MS	By matching	By MS/MS	By matching	By matching	3.7
Q13283	Q13283	4	4	3	Ras GTPase-activating protein-binding protein 1	G3BP1	>Q13283 Ras GTPase-activating protein-binding protein 1 OS=Homo sapiens OX=9606 GN=G3BP1 PE=1 SV=1	1	4	4	3	4	2	2	2	4	4	4	2	2	2	4	4	3	1	1	1	3	3	10.3	10.3	8.6	52.164	466	466	3.67		3		15	0	12.538	By MS/MS	By matching	By matching	By MS/MS	By MS/MS	By MS/MS	10.3
Q13308	Q13308	8	8	8	Inactive tyrosine-protein kinase 7	PTK7	>Q13308 Inactive tyrosine-protein kinase 7 OS=Homo sapiens OX=9606 GN=PTK7 PE=1 SV=2	1	8	8	8	3	2	0	2	7	3	3	2	0	2	7	3	3	2	0	2	7	3	11.5	11.5	11.5	118.39	1070	1070	2.82	3	1	9	4	0	40.695	By MS/MS	By MS/MS	By matching	By MS/MS	By MS/MS	By MS/MS	3.9
Q13347	Q13347	4	4	4	Eukaryotic translation initiation factor 3 subunit I	EIF3I	>Q13347 Eukaryotic translation initiation factor 3 subunit I OS=Homo sapiens OX=9606 GN=EIF3I PE=1 SV=1	1	4	4	4	3	2	1	2	2	1	3	2	1	2	2	1	3	2	1	2	2	1	14.5	14.5	14.5	36.501	325	325	3	2	2	1	6	0	10.632	By MS/MS	By MS/MS	By matching	By MS/MS	By MS/MS	By MS/MS	11.4
Q13361	Q13361	5	5	5	Microfibrillar-associated protein 5	MFAP5	>Q13361 Microfibrillar-associated protein 5 OS=Homo sapiens OX=9606 GN=MFAP5 PE=1 SV=1	1	5	5	5	4	2	5	0	1	2	4	2	5	0	1	2	4	2	5	0	1	2	27.2	27.2	27.2	19.611	173	173	2.83	5	2	8	8	0	55.179	By MS/MS	By MS/MS	By MS/MS	By matching	By matching	By matching	27.2
Q13363;P56545	Q13363;P56545	2;1	2;1	2;1	C-terminal-binding protein 1;C-terminal-binding protein 2	CTBP1;CTBP2	>Q13363 C-terminal-binding protein 1 OS=Homo sapiens OX=9606 GN=CTBP1 PE=1 SV=2;>P56545 C-terminal-binding protein 2 OS=Homo sapiens OX=9606 GN=CTBP2 PE=1 SV=1	2	2	2	2	2	2	1	1	2	2	2	2	1	1	2	2	2	2	1	1	2	2	6.4	6.4	6.4	47.535	440	440;445	2.36	5	4		5	0	11.72	By MS/MS	By MS/MS	By MS/MS	By MS/MS	By MS/MS	By MS/MS	6.4
Q13409	Q13409	3	3	3	Cytoplasmic dynein 1 intermediate chain 2	DYNC1I2	>Q13409 Cytoplasmic dynein 1 intermediate chain 2 OS=Homo sapiens OX=9606 GN=DYNC1I2 PE=1 SV=3	1	3	3	3	2	3	2	2	2	2	2	3	2	2	2	2	2	3	2	2	2	2	6.9	6.9	6.9	71.456	638	638	1.46	7	6			0	23.73	By MS/MS	By MS/MS	By MS/MS	By MS/MS	By MS/MS	By MS/MS	3.6
Q13421	Q13421	12	12	12	Mesothelin;Megakaryocyte-potentiating factor;Mesothelin, cleaved form	MSLN	>Q13421 Mesothelin OS=Homo sapiens OX=9606 GN=MSLN PE=1 SV=2	1	12	12	12	8	4	12	0	0	0	8	4	12	0	0	0	8	4	12	0	0	0	21.6	21.6	21.6	68.985	630	630	2.54	6	5	10	5	0	74.253	By MS/MS	By MS/MS	By MS/MS	By matching	By matching	By matching	15.2
Q13435	Q13435	2	2	2	Splicing factor 3B subunit 2	SF3B2	>Q13435 Splicing factor 3B subunit 2 OS=Homo sapiens OX=9606 GN=SF3B2 PE=1 SV=2	1	2	2	2	1	1	1	1	2	1	1	1	1	1	2	1	1	1	1	1	2	1	2.7	2.7	2.7	100.23	895	895	1.29	6		1		0	4.1252	By MS/MS	By MS/MS	By matching	By MS/MS	By MS/MS	By MS/MS	1.3
Q13438	Q13438	4	4	4	Protein OS-9	OS9	>Q13438 Protein OS-9 OS=Homo sapiens OX=9606 GN=OS9 PE=1 SV=1	1	4	4	4	3	4	2	3	4	4	3	4	2	3	4	4	3	4	2	3	4	4	6.6	6.6	6.6	75.561	667	667	2.05	6	8	7		0	8.2193	By MS/MS	By MS/MS	By MS/MS	By MS/MS	By MS/MS	By MS/MS	5.4
Q13442	Q13442	3	3	3	28 kDa heat- and acid-stable phosphoprotein	PDAP1	>Q13442 28 kDa heat- and acid-stable phosphoprotein OS=Homo sapiens OX=9606 GN=PDAP1 PE=1 SV=1	1	3	3	3	3	2	1	2	2	2	3	2	1	2	2	2	3	2	1	2	2	2	21.5	21.5	21.5	20.63	181	181	1.92	1	11			0	12.084	By MS/MS	By MS/MS	By MS/MS	By MS/MS	By MS/MS	By MS/MS	21.5
Q13443	Q13443	5	5	5	Disintegrin and metalloproteinase domain-containing protein 9	ADAM9	>Q13443 Disintegrin and metalloproteinase domain-containing protein 9 OS=Homo sapiens OX=9606 GN=ADAM9 PE=1 SV=1	1	5	5	5	5	1	5	5	4	2	5	1	5	5	4	2	5	1	5	5	4	2	7.4	7.4	7.4	90.555	819	819	2.54		13	15		0	55.648	By MS/MS	By MS/MS	By MS/MS	By MS/MS	By MS/MS	By MS/MS	7.4
Q13449	Q13449	2	2	2	Limbic system-associated membrane protein	LSAMP	>Q13449 Limbic system-associated membrane protein OS=Homo sapiens OX=9606 GN=LSAMP PE=1 SV=2	1	2	2	2	0	0	0	1	2	0	0	0	0	1	2	0	0	0	0	1	2	0	10.4	10.4	10.4	37.393	338	338	2.33		2	1		0	6.074	By matching	By matching	By matching	By MS/MS	By MS/MS	By matching	0
Q13451	Q13451	4	4	4	Peptidyl-prolyl cis-trans isomerase FKBP5	FKBP5	>Q13451 Peptidyl-prolyl cis-trans isomerase FKBP5 OS=Homo sapiens OX=9606 GN=FKBP5 PE=1 SV=2	1	4	4	4	1	2	1	2	3	2	1	2	1	2	3	2	1	2	1	2	3	2	12.3	12.3	12.3	51.212	457	457	1.91	5	4		2	0	6.8525	By MS/MS	By MS/MS	By MS/MS	By MS/MS	By MS/MS	By matching	2.6
Q13492;O60641	Q13492;O60641	2;1	2;1	2;1	Phosphatidylinositol-binding clathrin assembly protein;Clathrin coat assembly protein AP180	PICALM;SNAP91	>Q13492 Phosphatidylinositol-binding clathrin assembly protein OS=Homo sapiens OX=9606 GN=PICALM PE=1 SV=2;>O60641 Clathrin coat assembly protein AP180 OS=Homo sapiens OX=9606 GN=SNAP91 PE=1 SV=2	2	2	2	2	2	2	1	1	2	2	2	2	1	1	2	2	2	2	1	1	2	2	4.1	4.1	4.1	70.754	652	652;907	2.2	4		6		0	4.6821	By matching	By MS/MS	By MS/MS	By MS/MS	By MS/MS	By MS/MS	4.1
Q13510	Q13510	3	3	3	Acid ceramidase;Acid ceramidase subunit alpha;Acid ceramidase subunit beta	ASAH1	>Q13510 Acid ceramidase OS=Homo sapiens OX=9606 GN=ASAH1 PE=1 SV=5	1	3	3	3	3	3	3	3	3	3	3	3	3	3	3	3	3	3	3	3	3	3	9.9	9.9	9.9	44.659	395	395	3.05	6			13	0	8.9574	By MS/MS	By MS/MS	By MS/MS	By MS/MS	By MS/MS	By MS/MS	9.9
Q13561	Q13561	7	7	7	Dynactin subunit 2	DCTN2	>Q13561 Dynactin subunit 2 OS=Homo sapiens OX=9606 GN=DCTN2 PE=1 SV=4	1	7	7	7	6	4	6	5	7	4	6	4	6	5	7	4	6	4	6	5	7	4	22.9	22.9	22.9	44.23	401	401	2.51	5	11	18	3	0	27.916	By MS/MS	By MS/MS	By MS/MS	By MS/MS	By MS/MS	By matching	20.4
Q13596	Q13596	3	2	2	Sorting nexin-1	SNX1	>Q13596 Sorting nexin-1 OS=Homo sapiens OX=9606 GN=SNX1 PE=1 SV=3	1	3	2	2	3	2	1	3	3	2	2	1	0	2	2	1	2	1	0	2	2	1	6.9	4.8	4.8	59.069	522	522	2.12	5			3	0	4.8114	By MS/MS	By MS/MS	By matching	By MS/MS	By MS/MS	By matching	6.9
Q13616	Q13616	2	2	2	Cullin-1	CUL1	>Q13616 Cullin-1 OS=Homo sapiens OX=9606 GN=CUL1 PE=1 SV=2	1	2	2	2	2	2	2	2	2	1	2	2	2	2	2	1	2	2	2	2	2	1	2.7	2.7	2.7	89.677	776	776	1.91	6		5		0.0033113	1.8316	By MS/MS	By MS/MS	By matching	By MS/MS	By MS/MS	By matching	2.7
Q13617	Q13617	2	2	2	Cullin-2	CUL2	>Q13617 Cullin-2 OS=Homo sapiens OX=9606 GN=CUL2 PE=1 SV=2	1	2	2	2	1	2	0	1	1	1	1	2	0	1	1	1	1	2	0	1	1	1	4.8	4.8	4.8	86.982	745	745	1.43	6			1	0.00063412	2.7349	By MS/MS	By MS/MS	By matching	By MS/MS	By matching	By matching	1.6
Q13620;Q13619	Q13620	18;8	18;8	18;8	Cullin-4B	CUL4B	>Q13620 Cullin-4B OS=Homo sapiens OX=9606 GN=CUL4B PE=1 SV=4	2	18	18	18	16	18	13	16	14	13	16	18	13	16	14	13	16	18	13	16	14	13	21	21	21	103.98	913	913;759	2.61	17	25	35	21	0	107.03	By MS/MS	By MS/MS	By MS/MS	By MS/MS	By MS/MS	By MS/MS	18.1
Q13740	Q13740	6	6	6	CD166 antigen	ALCAM	>Q13740 CD166 antigen OS=Homo sapiens OX=9606 GN=ALCAM PE=1 SV=2	1	6	6	6	3	5	4	5	5	4	3	5	4	5	5	4	3	5	4	5	5	4	14.8	14.8	14.8	65.102	583	583	2.61	6	10	1	11	0	13.039	By MS/MS	By MS/MS	By MS/MS	By MS/MS	By MS/MS	By MS/MS	6
Q13751	Q13751	37	37	37	Laminin subunit beta-3	LAMB3	>Q13751 Laminin subunit beta-3 OS=Homo sapiens OX=9606 GN=LAMB3 PE=1 SV=1	1	37	37	37	37	27	36	3	2	2	37	27	36	3	2	2	37	27	36	3	2	2	36.7	36.7	36.7	129.57	1172	1172	2.71	16	66	66	43	0	323.31	By MS/MS	By MS/MS	By MS/MS	By matching	By matching	By matching	36.7
Q13753	Q13753	41	41	41	Laminin subunit gamma-2	LAMC2	>Q13753 Laminin subunit gamma-2 OS=Homo sapiens OX=9606 GN=LAMC2 PE=1 SV=2	1	41	41	41	40	31	37	5	3	1	40	31	37	5	3	1	40	31	37	5	3	1	42.2	42.2	42.2	130.97	1193	1193	2.51	45	36	58	39	0	323.31	By MS/MS	By MS/MS	By MS/MS	By MS/MS	By matching	By matching	41.3
Q13813	Q13813	79	79	79	Spectrin alpha chain, non-erythrocytic 1	SPTAN1	>Q13813 Spectrin alpha chain, non-erythrocytic 1 OS=Homo sapiens OX=9606 GN=SPTAN1 PE=1 SV=3	1	79	79	79	67	68	52	63	63	62	67	68	52	63	63	62	67	68	52	63	63	62	38.8	38.8	38.8	284.54	2472	2472	2.32	116	127	114	68	0	323.31	By MS/MS	By MS/MS	By MS/MS	By MS/MS	By MS/MS	By MS/MS	34.4
Q13822	Q13822	8	8	8	Ectonucleotide pyrophosphatase/phosphodiesterase family member 2	ENPP2	>Q13822 Ectonucleotide pyrophosphatase/phosphodiesterase family member 2 OS=Homo sapiens OX=9606 GN=ENPP2 PE=1 SV=3	1	8	8	8	1	0	0	0	1	8	1	0	0	0	1	8	1	0	0	0	1	8	14	14	14	98.993	863	863	3.07	2	2	3	7	0	25.146	By MS/MS	By matching	By matching	By matching	By MS/MS	By MS/MS	1.4
Q13838;O00148	Q13838;O00148	12;7	12;7	12;7	Spliceosome RNA helicase DDX39B;ATP-dependent RNA helicase DDX39A	DDX39B;DDX39A	>Q13838 Spliceosome RNA helicase DDX39B OS=Homo sapiens OX=9606 GN=DDX39B PE=1 SV=1;>O00148 ATP-dependent RNA helicase DDX39A OS=Homo sapiens OX=9606 GN=DDX39A PE=1 SV=2	2	12	12	12	10	10	8	12	11	9	10	10	8	12	11	9	10	10	8	12	11	9	33.9	33.9	33.9	48.991	428	428;427	2.74	9	18	24	18	0	37.65	By MS/MS	By MS/MS	By MS/MS	By MS/MS	By MS/MS	By MS/MS	29.9
Q13867	Q13867	3	3	3	Bleomycin hydrolase	BLMH	>Q13867 Bleomycin hydrolase OS=Homo sapiens OX=9606 GN=BLMH PE=1 SV=1	1	3	3	3	1	2	1	2	3	2	1	2	1	2	3	2	1	2	1	2	3	2	6.4	6.4	6.4	52.562	455	455	2.45		6	5		0	4.2831	By MS/MS	By MS/MS	By matching	By MS/MS	By MS/MS	By MS/MS	2.9
Q13885;Q9BVA1	Q13885;Q9BVA1	13;12	3;2	3;2	Tubulin beta-2A chain;Tubulin beta-2B chain	TUBB2A;TUBB2B	>Q13885 Tubulin beta-2A chain OS=Homo sapiens OX=9606 GN=TUBB2A PE=1 SV=1;>Q9BVA1 Tubulin beta-2B chain OS=Homo sapiens OX=9606 GN=TUBB2B PE=1 SV=1	2	13	3	3	11	11	7	10	10	8	1	3	0	1	1	1	1	3	0	1	1	1	38	12.1	12.1	49.906	445	445;445	2.27		9	1	1	0	11.337	By MS/MS	By MS/MS	By matching	By MS/MS	By matching	By MS/MS	28.5
Q13938	Q13938	5	5	5	Calcyphosin	CAPS	>Q13938 Calcyphosin OS=Homo sapiens OX=9606 GN=CAPS PE=1 SV=1	1	5	5	5	5	5	4	3	2	3	5	5	4	3	2	3	5	5	4	3	2	3	32.3	32.3	32.3	20.967	189	189	2.42	9		11	4	0	45.356	By MS/MS	By MS/MS	By MS/MS	By MS/MS	By MS/MS	By MS/MS	32.3
Q14019	Q14019	6	6	6	Coactosin-like protein	COTL1	>Q14019 Coactosin-like protein OS=Homo sapiens OX=9606 GN=COTL1 PE=1 SV=3	1	6	6	6	3	3	3	4	5	6	3	3	3	4	5	6	3	3	3	4	5	6	44.4	44.4	44.4	15.945	142	142	1.69	14	6	6		0	61.45	By MS/MS	By MS/MS	By MS/MS	By MS/MS	By MS/MS	By MS/MS	12
Q14031	Q14031	3	3	3	Collagen alpha-6(IV) chain	COL4A6	>Q14031 Collagen alpha-6(IV) chain OS=Homo sapiens OX=9606 GN=COL4A6 PE=1 SV=3	1	3	3	3	0	0	0	0	3	0	0	0	0	0	3	0	0	0	0	0	3	0	3.2	3.2	3.2	163.8	1691	1691	3.33			2	1	0	6.7511	By matching	By matching	By matching	By matching	By MS/MS	By matching	0
Q14103	Q14103	6	6	6	Heterogeneous nuclear ribonucleoprotein D0	HNRNPD	>Q14103 Heterogeneous nuclear ribonucleoprotein D0 OS=Homo sapiens OX=9606 GN=HNRNPD PE=1 SV=1	1	6	6	6	5	5	3	4	6	5	5	5	3	4	6	5	5	5	3	4	6	5	19.7	19.7	19.7	38.434	355	355	2.26	7	15	17		0	43.17	By MS/MS	By MS/MS	By MS/MS	By MS/MS	By MS/MS	By MS/MS	17.5
Q14108	Q14108	2	2	2	Lysosome membrane protein 2	SCARB2	>Q14108 Lysosome membrane protein 2 OS=Homo sapiens OX=9606 GN=SCARB2 PE=1 SV=2	1	2	2	2	2	2	1	1	2	2	2	2	1	1	2	2	2	2	1	1	2	2	4.2	4.2	4.2	54.29	478	478	3			10		0	3.6537	By MS/MS	By MS/MS	By MS/MS	By MS/MS	By MS/MS	By MS/MS	4.2
Q14112	Q14112	29	29	28	Nidogen-2	NID2	>Q14112 Nidogen-2 OS=Homo sapiens OX=9606 GN=NID2 PE=1 SV=3	1	29	29	28	12	9	25	24	24	26	12	9	25	24	24	26	12	9	25	24	23	25	27.6	27.6	26.9	151.25	1375	1375	2.56	27	54	31	41	0	305.61	By MS/MS	By MS/MS	By MS/MS	By MS/MS	By MS/MS	By MS/MS	10.8
Q14118	Q14118	6	6	6	Dystroglycan;Alpha-dystroglycan;Beta-dystroglycan	DAG1	>Q14118 Dystroglycan OS=Homo sapiens OX=9606 GN=DAG1 PE=1 SV=2	1	6	6	6	5	5	6	4	5	3	5	5	6	4	5	3	5	5	6	4	5	3	9.2	9.2	9.2	97.44	895	895	3.33		7	12	20	0	14.844	By MS/MS	By MS/MS	By MS/MS	By MS/MS	By MS/MS	By MS/MS	6.4
Q14126	Q14126	2	2	2	Desmoglein-2	DSG2	>Q14126 Desmoglein-2 OS=Homo sapiens OX=9606 GN=DSG2 PE=1 SV=2	1	2	2	2	2	0	0	0	0	0	2	0	0	0	0	0	2	0	0	0	0	0	2.4	2.4	2.4	122.29	1118	1118	2	1		1		0	4.9104	By MS/MS	By matching	By matching	By matching	By matching	By matching	2.4
Q14152	Q14152	10	10	10	Eukaryotic translation initiation factor 3 subunit A	EIF3A	>Q14152 Eukaryotic translation initiation factor 3 subunit A OS=Homo sapiens OX=9606 GN=EIF3A PE=1 SV=1	1	10	10	10	8	7	3	5	8	5	8	7	3	5	8	5	8	7	3	5	8	5	8.8	8.8	8.8	166.57	1382	1382	2.92	10	4	3	21	0	18.561	By MS/MS	By MS/MS	By matching	By MS/MS	By MS/MS	By MS/MS	6.8
Q14194	Q14194	7	3	3	Dihydropyrimidinase-related protein 1	CRMP1	>Q14194 Dihydropyrimidinase-related protein 1 OS=Homo sapiens OX=9606 GN=CRMP1 PE=1 SV=1	1	7	3	3	4	6	4	4	5	4	0	2	0	0	1	0	0	2	0	0	1	0	14.3	6.6	6.6	62.183	572	572	2.33	1		2		0	3.0914	By matching	By MS/MS	By matching	By matching	By MS/MS	By matching	7.7
Q14195;Q14117	Q14195	20;1	20;1	15;0	Dihydropyrimidinase-related protein 3	DPYSL3	>Q14195 Dihydropyrimidinase-related protein 3 OS=Homo sapiens OX=9606 GN=DPYSL3 PE=1 SV=1	2	20	20	15	18	19	16	19	20	18	18	19	16	19	20	18	13	14	11	14	15	14	47.5	47.5	37.4	61.963	570	570;519	2.61	24	13	94	7	0	190.47	By MS/MS	By MS/MS	By MS/MS	By MS/MS	By MS/MS	By MS/MS	42.6
Q14203	Q14203	5	5	5	Dynactin subunit 1	DCTN1	>Q14203 Dynactin subunit 1 OS=Homo sapiens OX=9606 GN=DCTN1 PE=1 SV=3	1	5	5	5	3	2	2	2	4	2	3	2	2	2	4	2	3	2	2	2	4	2	4.8	4.8	4.8	141.69	1278	1278	2.81	1	6	4	5	0	11.745	By MS/MS	By MS/MS	By matching	By MS/MS	By MS/MS	By MS/MS	2.8
Q14204	Q14204	13	13	13	Cytoplasmic dynein 1 heavy chain 1	DYNC1H1	>Q14204 Cytoplasmic dynein 1 heavy chain 1 OS=Homo sapiens OX=9606 GN=DYNC1H1 PE=1 SV=5	1	13	13	13	13	9	5	11	10	6	13	9	5	11	10	6	13	9	5	11	10	6	3.7	3.7	3.7	532.4	4646	4646	2.78	15	5	12	23	0	29.744	By MS/MS	By MS/MS	By matching	By MS/MS	By MS/MS	By MS/MS	3.7
Q14240	Q14240	16	16	8	Eukaryotic initiation factor 4A-II	EIF4A2	>Q14240 Eukaryotic initiation factor 4A-II OS=Homo sapiens OX=9606 GN=EIF4A2 PE=1 SV=2	1	16	16	8	16	15	14	15	14	16	16	15	14	15	14	16	8	8	7	8	7	8	31.7	31.7	15.2	46.402	407	407	2.65	12	34	50	18	0	103.66	By MS/MS	By MS/MS	By MS/MS	By MS/MS	By MS/MS	By MS/MS	31.7
Q14247	Q14247	6	6	6	Src substrate cortactin	CTTN	>Q14247 Src substrate cortactin OS=Homo sapiens OX=9606 GN=CTTN PE=1 SV=2	1	6	6	6	5	2	1	4	3	1	5	2	1	4	3	1	5	2	1	4	3	1	13.3	13.3	13.3	61.585	550	550	2.71		11		6	0	10.962	By MS/MS	By MS/MS	By MS/MS	By MS/MS	By MS/MS	By MS/MS	9.6
Q14315	Q14315	33	22	22	Filamin-C	FLNC	>Q14315 Filamin-C OS=Homo sapiens OX=9606 GN=FLNC PE=1 SV=3	1	33	22	22	13	20	13	19	29	20	3	12	4	10	20	12	3	12	4	10	20	12	15.7	11.1	11.1	291.02	2725	2725	3	17	5	7	39	0	220.62	By MS/MS	By MS/MS	By MS/MS	By MS/MS	By MS/MS	By MS/MS	5.8
Q14393	Q14393	11	11	11	Growth arrest-specific protein 6	GAS6	>Q14393 Growth arrest-specific protein 6 OS=Homo sapiens OX=9606 GN=GAS6 PE=1 SV=2	1	11	11	11	10	6	8	10	10	7	10	6	8	10	10	7	10	6	8	10	10	7	17.8	17.8	17.8	79.676	721	721	2.92	10	7	27	22	0	74.898	By MS/MS	By MS/MS	By MS/MS	By MS/MS	By MS/MS	By MS/MS	16.1
Q14444	Q14444	5	5	5	Caprin-1	CAPRIN1	>Q14444 Caprin-1 OS=Homo sapiens OX=9606 GN=CAPRIN1 PE=1 SV=2	1	5	5	5	3	2	1	3	5	3	3	2	1	3	5	3	3	2	1	3	5	3	9	9	9	78.365	709	709	2.82		5	10	2	0	10.2	By MS/MS	By MS/MS	By matching	By MS/MS	By MS/MS	By MS/MS	4.7
Q14554	Q14554	2	2	2	Protein disulfide-isomerase A5	PDIA5	>Q14554 Protein disulfide-isomerase A5 OS=Homo sapiens OX=9606 GN=PDIA5 PE=1 SV=1	1	2	2	2	1	2	1	2	2	1	1	2	1	2	2	1	1	2	1	2	2	1	4.2	4.2	4.2	59.594	519	519	3	3			6	0.0023162	2.0727	By MS/MS	By MS/MS	By MS/MS	By MS/MS	By MS/MS	By MS/MS	1.9
Q14574	Q14574	5	5	5	Desmocollin-3	DSC3	>Q14574 Desmocollin-3 OS=Homo sapiens OX=9606 GN=DSC3 PE=1 SV=3	1	5	5	5	5	3	5	0	3	2	5	3	5	0	3	2	5	3	5	0	3	2	5	5	5	99.968	896	896	2.68	3	10	4	8	0	12.165	By MS/MS	By MS/MS	By MS/MS	By matching	By MS/MS	By matching	5
Q14677	Q14677	3	3	3	Clathrin interactor 1	CLINT1	>Q14677 Clathrin interactor 1 OS=Homo sapiens OX=9606 GN=CLINT1 PE=1 SV=1	1	3	3	3	0	1	1	2	3	2	0	1	1	2	3	2	0	1	1	2	3	2	6.2	6.2	6.2	68.259	625	625	1.73	5	4	2		0	4.6699	By matching	By MS/MS	By MS/MS	By MS/MS	By MS/MS	By MS/MS	0
Q14696	Q14696	4	4	4	LDLR chaperone MESD	MESDC2	>Q14696 LRP chaperone MESD OS=Homo sapiens OX=9606 GN=MESD PE=1 SV=2	1	4	4	4	3	3	2	3	4	2	3	3	2	3	4	2	3	3	2	3	4	2	26.9	26.9	26.9	26.076	234	234	1.95	8	8	5	1	0	11.96	By MS/MS	By MS/MS	By MS/MS	By MS/MS	By MS/MS	By MS/MS	17.5
Q14697	Q14697	21	21	21	Neutral alpha-glucosidase AB	GANAB	>Q14697 Neutral alpha-glucosidase AB OS=Homo sapiens OX=9606 GN=GANAB PE=1 SV=3	1	21	21	21	9	11	7	17	20	13	9	11	7	17	20	13	9	11	7	17	20	13	22.8	22.8	22.8	106.87	944	944	2.23	33	14	20	16	0	117.64	By MS/MS	By MS/MS	By MS/MS	By MS/MS	By MS/MS	By MS/MS	9.6
Q14764	Q14764	16	16	16	Major vault protein	MVP	>Q14764 Major vault protein OS=Homo sapiens OX=9606 GN=MVP PE=1 SV=4	1	16	16	16	3	3	1	11	14	10	3	3	1	11	14	10	3	3	1	11	14	10	20	20	20	99.326	893	893	2.26	12	12	20	2	0	49.487	By MS/MS	By MS/MS	By matching	By MS/MS	By MS/MS	By MS/MS	4
Q14766	Q14766	29	29	28	Latent-transforming growth factor beta-binding protein 1	LTBP1	>Q14766 Latent-transforming growth factor beta-binding protein 1 OS=Homo sapiens OX=9606 GN=LTBP1 PE=1 SV=4	1	29	29	28	14	9	9	20	25	20	14	9	9	20	25	20	14	9	9	20	24	20	25.4	25.4	24.9	186.79	1721	1721	2.53	26	34	35	28	0	323.31	By MS/MS	By MS/MS	By MS/MS	By MS/MS	By MS/MS	By MS/MS	12
Q14767	Q14767	28	28	28	Latent-transforming growth factor beta-binding protein 2	LTBP2	>Q14767 Latent-transforming growth factor beta-binding protein 2 OS=Homo sapiens OX=9606 GN=LTBP2 PE=1 SV=3	1	28	28	28	25	17	10	18	24	16	25	17	10	18	24	16	25	17	10	18	24	16	20.3	20.3	20.3	195.05	1821	1821	2.74	28	37	32	54	0	181.94	By MS/MS	By MS/MS	By MS/MS	By MS/MS	By MS/MS	By MS/MS	18.5
Q14847	Q14847	7	7	7	LIM and SH3 domain protein 1	LASP1	>Q14847 LIM and SH3 domain protein 1 OS=Homo sapiens OX=9606 GN=LASP1 PE=1 SV=2	1	7	7	7	6	6	6	6	5	5	6	6	6	6	5	5	6	6	6	6	5	5	28.7	28.7	28.7	29.717	261	261	1.94	16	5	14		0	39.837	By MS/MS	By MS/MS	By MS/MS	By MS/MS	By MS/MS	By MS/MS	23
Q14914	Q14914	2	2	2	Prostaglandin reductase 1	PTGR1	>Q14914 Prostaglandin reductase 1 OS=Homo sapiens OX=9606 GN=PTGR1 PE=1 SV=2	1	2	2	2	1	1	1	2	1	1	1	1	1	2	1	1	1	1	1	2	1	1	7.3	7.3	7.3	35.869	329	329	2.77	1	1	11		0	9.8187	By MS/MS	By MS/MS	By MS/MS	By MS/MS	By MS/MS	By MS/MS	4.3
Q14974	Q14974	16	16	16	Importin subunit beta-1	KPNB1	>Q14974 Importin subunit beta-1 OS=Homo sapiens OX=9606 GN=KPNB1 PE=1 SV=2	1	16	16	16	14	13	10	14	14	13	14	13	10	14	14	13	14	13	10	14	14	13	21.7	21.7	21.7	97.169	876	876	3.06	12	10	27	39	0	45.671	By MS/MS	By MS/MS	By MS/MS	By MS/MS	By MS/MS	By MS/MS	18.9
Q15008	Q15008	4	4	4	26S proteasome non-ATPase regulatory subunit 6	PSMD6	>Q15008 26S proteasome non-ATPase regulatory subunit 6 OS=Homo sapiens OX=9606 GN=PSMD6 PE=1 SV=1	1	4	4	4	4	4	4	4	4	3	4	4	4	4	4	3	4	4	4	4	4	3	12.1	12.1	12.1	45.531	389	389	1.18	28	6			0	27.239	By MS/MS	By MS/MS	By MS/MS	By MS/MS	By MS/MS	By MS/MS	12.1
Q15019	Q15019	5	5	5	Septin-2	45537	>Q15019 Septin-2 OS=Homo sapiens OX=9606 GN=SEPT2 PE=1 SV=1	1	5	5	5	4	5	3	3	5	4	4	5	3	3	5	4	4	5	3	3	5	4	18.3	18.3	18.3	41.487	361	361	2.17	6	12	11		0	25.876	By MS/MS	By MS/MS	By MS/MS	By MS/MS	By MS/MS	By MS/MS	14.4
Q15020	Q15020	3	3	3	Squamous cell carcinoma antigen recognized by T-cells 3	SART3	>Q15020 Squamous cell carcinoma antigen recognized by T-cells 3 OS=Homo sapiens OX=9606 GN=SART3 PE=1 SV=1	1	3	3	3	1	2	0	3	3	1	1	2	0	3	3	1	1	2	0	3	3	1	3.4	3.4	3.4	109.93	963	963	2	4	4		2	0.0017741	2.1887	By matching	By matching	By matching	By MS/MS	By MS/MS	By matching	0.8
Q15046	Q15046	5	5	5	Lysine--tRNA ligase	KARS	>Q15046 Lysine--tRNA ligase OS=Homo sapiens OX=9606 GN=KARS PE=1 SV=3	1	5	5	5	4	3	2	3	4	3	4	3	2	3	4	3	4	3	2	3	4	3	7.7	7.7	7.7	68.047	597	597	2.74	2	7	4	6	0	16.938	By MS/MS	By MS/MS	By MS/MS	By MS/MS	By MS/MS	By MS/MS	6.2
Q15056	Q15056	3	3	3	Eukaryotic translation initiation factor 4H	EIF4H	>Q15056 Eukaryotic translation initiation factor 4H OS=Homo sapiens OX=9606 GN=EIF4H PE=1 SV=5	1	3	3	3	2	2	3	3	2	2	2	2	3	3	2	2	2	2	3	3	2	2	13.7	13.7	13.7	27.385	248	248	2.27	2	7	6		0	18.341	By MS/MS	By MS/MS	By MS/MS	By MS/MS	By MS/MS	By MS/MS	10.9
Q15063	Q15063	31	31	13	Periostin	POSTN	>Q15063 Periostin OS=Homo sapiens OX=9606 GN=POSTN PE=1 SV=2	1	31	31	13	5	23	5	28	31	28	5	23	5	28	31	28	1	10	1	11	13	11	48.9	48.9	21.4	93.313	836	836	2.71	41	51	45	72	0	323.31	By MS/MS	By MS/MS	By MS/MS	By MS/MS	By MS/MS	By MS/MS	7.9
Q15075	Q15075	6	6	6	Early endosome antigen 1	EEA1	>Q15075 Early endosome antigen 1 OS=Homo sapiens OX=9606 GN=EEA1 PE=1 SV=2	1	6	6	6	2	3	1	3	4	4	2	3	1	3	4	4	2	3	1	3	4	4	5.1	5.1	5.1	162.46	1411	1411	2	4	11		2	0	10.955	By MS/MS	By MS/MS	By matching	By MS/MS	By MS/MS	By MS/MS	1.6
Q15084	Q15084	8	8	8	Protein disulfide-isomerase A6	PDIA6	>Q15084 Protein disulfide-isomerase A6 OS=Homo sapiens OX=9606 GN=PDIA6 PE=1 SV=1	1	8	8	8	5	8	7	8	8	8	5	8	7	8	8	8	5	8	7	8	8	8	20.2	20.2	20.2	48.121	440	440	2.55	22	6	6	24	0	86.568	By MS/MS	By MS/MS	By MS/MS	By MS/MS	By MS/MS	By MS/MS	14.8
Q15102	Q15102	5	5	5	Platelet-activating factor acetylhydrolase IB subunit gamma	PAFAH1B3	>Q15102 Platelet-activating factor acetylhydrolase IB subunit gamma OS=Homo sapiens OX=9606 GN=PAFAH1B3 PE=1 SV=1	1	5	5	5	5	5	4	5	5	5	5	5	4	5	5	5	5	5	4	5	5	5	19.9	19.9	19.9	25.734	231	231	2.18	6	16	12		0	10.932	By MS/MS	By MS/MS	By MS/MS	By MS/MS	By MS/MS	By MS/MS	19.9
Q15113	Q15113	14	14	14	Procollagen C-endopeptidase enhancer 1	PCOLCE	>Q15113 Procollagen C-endopeptidase enhancer 1 OS=Homo sapiens OX=9606 GN=PCOLCE PE=1 SV=2	1	14	14	14	0	4	0	13	14	14	0	4	0	13	14	14	0	4	0	13	14	14	43.9	43.9	43.9	47.972	449	449	2.87	6	18	39	19	0	132.49	By matching	By MS/MS	By matching	By MS/MS	By MS/MS	By MS/MS	0
Q15121	Q15121	4	4	4	Astrocytic phosphoprotein PEA-15	PEA15	>Q15121 Astrocytic phosphoprotein PEA-15 OS=Homo sapiens OX=9606 GN=PEA15 PE=1 SV=2	1	4	4	4	3	3	3	4	3	3	3	3	3	4	3	3	3	3	3	4	3	3	36.9	36.9	36.9	15.04	130	130	4				27	0	86.468	By MS/MS	By MS/MS	By MS/MS	By MS/MS	By MS/MS	By MS/MS	34.6
Q15149;P58107	Q15149	48;2	48;2	48;2	Plectin	PLEC	>Q15149 Plectin OS=Homo sapiens OX=9606 GN=PLEC PE=1 SV=3	2	48	48	48	35	17	10	19	42	19	35	17	10	19	42	19	35	17	10	19	42	19	13.2	13.2	13.2	531.78	4684	4684;5088	2.03	73	32	12	33	0	113	By MS/MS	By MS/MS	By MS/MS	By MS/MS	By MS/MS	By MS/MS	10.1
Q15181	Q15181	5	5	5	Inorganic pyrophosphatase	PPA1	>Q15181 Inorganic pyrophosphatase OS=Homo sapiens OX=9606 GN=PPA1 PE=1 SV=2	1	5	5	5	3	3	2	5	5	3	3	3	2	5	5	3	3	3	2	5	5	3	27.3	27.3	27.3	32.66	289	289	2.67	6	5		10	0	51.746	By MS/MS	By MS/MS	By MS/MS	By MS/MS	By MS/MS	By MS/MS	17.6
Q15185	Q15185	6	6	6	Prostaglandin E synthase 3	PTGES3	>Q15185 Prostaglandin E synthase 3 OS=Homo sapiens OX=9606 GN=PTGES3 PE=1 SV=1	1	6	6	6	4	6	5	6	6	4	4	6	5	6	6	4	4	6	5	6	6	4	43.8	43.8	43.8	18.697	160	160	2.71	7	11	6	14	0	91.292	By MS/MS	By MS/MS	By MS/MS	By MS/MS	By MS/MS	By MS/MS	29.4
Q15233	Q15233	4	4	4	Non-POU domain-containing octamer-binding protein	NONO	>Q15233 Non-POU domain-containing octamer-binding protein OS=Homo sapiens OX=9606 GN=NONO PE=1 SV=4	1	4	4	4	4	4	1	2	2	0	4	4	1	2	2	0	4	4	1	2	2	0	9.8	9.8	9.8	54.231	471	471	3.54		2	2	9	0	12.181	By MS/MS	By MS/MS	By matching	By matching	By matching	By matching	9.8
Q15257	Q15257	7	7	7	Serine/threonine-protein phosphatase 2A activator	PPP2R4	>Q15257 Serine/threonine-protein phosphatase 2A activator OS=Homo sapiens OX=9606 GN=PTPA PE=1 SV=3	1	7	7	7	5	6	5	6	7	6	5	6	5	6	7	6	5	6	5	6	7	6	20.1	20.1	20.1	40.667	358	358	2.49	7	12	11	7	0	24.665	By MS/MS	By MS/MS	By MS/MS	By MS/MS	By MS/MS	By MS/MS	13.4
Q15293	Q15293	9	9	9	Reticulocalbin-1	RCN1	>Q15293 Reticulocalbin-1 OS=Homo sapiens OX=9606 GN=RCN1 PE=1 SV=1	1	9	9	9	8	2	7	8	8	5	8	2	7	8	8	5	8	2	7	8	8	5	31.7	31.7	31.7	38.89	331	331	1.84	20	12	13		0	45.202	By MS/MS	By matching	By MS/MS	By MS/MS	By MS/MS	By MS/MS	28.1
Q15365	Q15365	6	6	4	Poly(rC)-binding protein 1	PCBP1	>Q15365 Poly(rC)-binding protein 1 OS=Homo sapiens OX=9606 GN=PCBP1 PE=1 SV=2	1	6	6	4	6	6	5	5	5	4	6	6	5	5	5	4	4	4	4	3	3	3	23	23	15.2	37.497	356	356	2.82	6	8	6	14	0	29.793	By MS/MS	By MS/MS	By MS/MS	By MS/MS	By MS/MS	By MS/MS	23
Q15366	Q15366	5	3	2	Poly(rC)-binding protein 2	PCBP2	>Q15366 Poly(rC)-binding protein 2 OS=Homo sapiens OX=9606 GN=PCBP2 PE=1 SV=1	1	5	3	2	4	5	3	4	4	3	2	3	2	2	2	2	1	2	1	1	1	1	18.9	11.2	7.4	38.58	365	365	2.73	6		1	8	0	7.0753	By MS/MS	By MS/MS	By MS/MS	By MS/MS	By MS/MS	By MS/MS	15.1
Q15369	Q15369	3	3	3	Transcription elongation factor B polypeptide 1	TCEB1	>Q15369 Elongin-C OS=Homo sapiens OX=9606 GN=ELOC PE=1 SV=1	1	3	3	3	3	3	3	3	3	3	3	3	3	3	3	3	3	3	3	3	3	3	32.1	32.1	32.1	12.473	112	112	2.5		12	12		0	11.719	By MS/MS	By MS/MS	By MS/MS	By MS/MS	By MS/MS	By MS/MS	32.1
Q15370	Q15370	3	3	3	Transcription elongation factor B polypeptide 2	TCEB2	>Q15370 Elongin-B OS=Homo sapiens OX=9606 GN=ELOB PE=1 SV=1	1	3	3	3	2	2	2	3	2	1	2	2	2	3	2	1	2	2	2	3	2	1	28.8	28.8	28.8	13.133	118	118	1.83	2	10			0	2.9557	By MS/MS	By matching	By matching	By matching	By MS/MS	By matching	18.6
Q15393	Q15393	6	6	6	Splicing factor 3B subunit 3	SF3B3	>Q15393 Splicing factor 3B subunit 3 OS=Homo sapiens OX=9606 GN=SF3B3 PE=1 SV=4	1	6	6	6	2	6	1	5	6	5	2	6	1	5	6	5	2	6	1	5	6	5	7.1	7.1	7.1	135.58	1217	1217	2.86	8	4		16	0	37.151	By MS/MS	By MS/MS	By matching	By MS/MS	By MS/MS	By MS/MS	1.9
Q15404	Q15404	5	5	5	Ras suppressor protein 1	RSU1	>Q15404 Ras suppressor protein 1 OS=Homo sapiens OX=9606 GN=RSU1 PE=1 SV=3	1	5	5	5	4	5	3	3	5	4	4	5	3	3	5	4	4	5	3	3	5	4	21.3	21.3	21.3	31.54	277	277	3.15		6	10	10	0	14.576	By MS/MS	By MS/MS	By MS/MS	By MS/MS	By MS/MS	By MS/MS	15.2
Q15417	Q15417	5	5	4	Calponin-3	CNN3	>Q15417 Calponin-3 OS=Homo sapiens OX=9606 GN=CNN3 PE=1 SV=1	1	5	5	4	4	1	1	4	4	3	4	1	1	4	4	3	3	1	1	3	4	3	17.6	17.6	14.3	36.413	329	329	2.44	4	3	10	1	0	16.017	By MS/MS	By MS/MS	By MS/MS	By MS/MS	By MS/MS	By MS/MS	13.7
Q15435	Q15435	7	7	7	Protein phosphatase 1 regulatory subunit 7	PPP1R7	>Q15435 Protein phosphatase 1 regulatory subunit 7 OS=Homo sapiens OX=9606 GN=PPP1R7 PE=1 SV=1	1	7	7	7	6	6	5	4	5	5	6	6	5	4	5	5	6	6	5	4	5	5	17.5	17.5	17.5	41.564	360	360	3.32	1	4	12	17	0	13.177	By MS/MS	By MS/MS	By MS/MS	By MS/MS	By MS/MS	By MS/MS	14.7
Q15436	Q15436	5	5	4	Protein transport protein Sec23A	SEC23A	>Q15436 Protein transport protein Sec23A OS=Homo sapiens OX=9606 GN=SEC23A PE=1 SV=2	1	5	5	4	3	4	2	3	5	3	3	4	2	3	5	3	2	3	1	2	4	2	8.1	8.1	6.3	86.16	765	765	3.29		2	11	8	0	13.793	By MS/MS	By MS/MS	By matching	By MS/MS	By MS/MS	By MS/MS	5.1
Q15437	Q15437	3	2	2	Protein transport protein Sec23B	SEC23B	>Q15437 Protein transport protein Sec23B OS=Homo sapiens OX=9606 GN=SEC23B PE=1 SV=2	1	3	2	2	2	3	2	3	3	2	1	2	1	2	2	1	1	2	1	2	2	1	4.8	3	3	86.478	767	767	3.33			6	3	0	9.746	By MS/MS	By MS/MS	By MS/MS	By MS/MS	By MS/MS	By MS/MS	3.5
Q15459	Q15459	4	4	4	Splicing factor 3A subunit 1	SF3A1	>Q15459 Splicing factor 3A subunit 1 OS=Homo sapiens OX=9606 GN=SF3A1 PE=1 SV=1	1	4	4	4	4	4	3	2	4	3	4	4	3	2	4	3	4	4	3	2	4	3	6.3	6.3	6.3	88.885	793	793	1.85	6	11	3		0	7.0516	By MS/MS	By MS/MS	By MS/MS	By matching	By MS/MS	By matching	6.3
Q15517	Q15517	10	10	10	Corneodesmosin	CDSN	>Q15517 Corneodesmosin OS=Homo sapiens OX=9606 GN=CDSN PE=1 SV=3	1	10	10	10	4	3	10	0	0	1	4	3	10	0	0	1	4	3	10	0	0	1	32.9	32.9	32.9	51.522	529	529	2.96		8	8	7	0	248.69	By MS/MS	By MS/MS	By MS/MS	By matching	By matching	By matching	11.3
Q15582	Q15582	28	28	28	Transforming growth factor-beta-induced protein ig-h3	TGFBI	>Q15582 Transforming growth factor-beta-induced protein ig-h3 OS=Homo sapiens OX=9606 GN=TGFBI PE=1 SV=1	1	28	28	28	26	23	24	28	28	25	26	23	24	28	28	25	26	23	24	28	28	25	53.9	53.9	53.9	74.68	683	683	2.53	122	193	121	156	0	323.31	By MS/MS	By MS/MS	By MS/MS	By MS/MS	By MS/MS	By MS/MS	51.1
Q15631	Q15631	6	6	6	Translin	TSN	>Q15631 Translin OS=Homo sapiens OX=9606 GN=TSN PE=1 SV=1	1	6	6	6	6	6	3	3	5	3	6	6	3	3	5	3	6	6	3	3	5	3	28.1	28.1	28.1	26.183	228	228	2.04	3	19	4		0	16.85	By MS/MS	By MS/MS	By MS/MS	By MS/MS	By MS/MS	By MS/MS	28.1
Q15637	Q15637	2	2	2	Splicing factor 1	SF1	>Q15637 Splicing factor 1 OS=Homo sapiens OX=9606 GN=SF1 PE=1 SV=4	1	2	2	2	1	2	0	1	2	1	1	2	0	1	2	1	1	2	0	1	2	1	3.3	3.3	3.3	68.329	639	639	3.5		2		6	0	3.448	By MS/MS	By matching	By matching	By MS/MS	By MS/MS	By MS/MS	1.7
Q15691	Q15691	3	3	2	Microtubule-associated protein RP/EB family member 1	MAPRE1	>Q15691 Microtubule-associated protein RP/EB family member 1 OS=Homo sapiens OX=9606 GN=MAPRE1 PE=1 SV=3	1	3	3	2	2	3	2	2	2	3	2	3	2	2	2	3	1	2	2	1	2	2	9	9	5.6	29.999	268	268	2.43	6		4	4	0	3.1938	By MS/MS	By MS/MS	By MS/MS	By MS/MS	By MS/MS	By MS/MS	6.3
Q15717;Q12926;P26378	Q15717	4;1;1	4;1;1	4;1;1	ELAV-like protein 1	ELAVL1	>Q15717 ELAV-like protein 1 OS=Homo sapiens OX=9606 GN=ELAVL1 PE=1 SV=2	3	4	4	4	2	3	3	3	4	2	2	3	3	3	4	2	2	3	3	3	4	2	12.9	12.9	12.9	36.091	326	326;359;380	2.18	7		10		0	12.054	By MS/MS	By MS/MS	By MS/MS	By MS/MS	By MS/MS	By MS/MS	5.8
Q15746	Q15746	4	4	4	Myosin light chain kinase, smooth muscle;Myosin light chain kinase, smooth muscle, deglutamylated form	MYLK	>Q15746 Myosin light chain kinase, smooth muscle OS=Homo sapiens OX=9606 GN=MYLK PE=1 SV=4	1	4	4	4	4	4	3	4	4	4	4	4	3	4	4	4	4	4	3	4	4	4	2	2	2	210.71	1914	1914	2.6	6	12		12	0	8.6148	By MS/MS	By MS/MS	By MS/MS	By MS/MS	By MS/MS	By MS/MS	2
Q15782	Q15782	6	6	6	Chitinase-3-like protein 2	CHI3L2	>Q15782 Chitinase-3-like protein 2 OS=Homo sapiens OX=9606 GN=CHI3L2 PE=1 SV=1	1	6	6	6	0	0	0	0	6	1	0	0	0	0	6	1	0	0	0	0	6	1	19.5	19.5	19.5	43.5	390	390	2.75	1	2	3	2	0	28.601	By matching	By matching	By matching	By matching	By MS/MS	By MS/MS	0
Q15828	Q15828	5	5	5	Cystatin-M	CST6	>Q15828 Cystatin-M OS=Homo sapiens OX=9606 GN=CST6 PE=1 SV=1	1	5	5	5	5	4	5	0	0	0	5	4	5	0	0	0	5	4	5	0	0	0	49	49	49	16.511	149	149	2.95	5		8	9	0	159.05	By MS/MS	By MS/MS	By MS/MS	By matching	By matching	By matching	49
Q15843	Q15843	3	3	3	NEDD8	NEDD8	>Q15843 NEDD8 OS=Homo sapiens OX=9606 GN=NEDD8 PE=1 SV=1	1	3	3	3	3	3	3	3	3	3	3	3	3	3	3	3	3	3	3	3	3	3	28.4	28.4	28.4	9.0714	81	81	1	20				0	7.9019	By MS/MS	By MS/MS	By MS/MS	By MS/MS	By MS/MS	By MS/MS	28.4
Q15847	Q15847	2	2	2	Adipogenesis regulatory factor	ADIRF	>Q15847 Adipogenesis regulatory factor OS=Homo sapiens OX=9606 GN=ADIRF PE=1 SV=1	1	2	2	2	0	0	2	0	0	0	0	0	2	0	0	0	0	0	2	0	0	0	59.2	59.2	59.2	7.8547	76	76	3.5			1	1	0	10.156	By matching	By matching	By MS/MS	By matching	By matching	By matching	0
Q15904	Q15904	3	3	3	V-type proton ATPase subunit S1	ATP6AP1	>Q15904 V-type proton ATPase subunit S1 OS=Homo sapiens OX=9606 GN=ATP6AP1 PE=1 SV=2	1	3	3	3	3	2	2	2	2	2	3	2	2	2	2	2	3	2	2	2	2	2	8.7	8.7	8.7	52.025	470	470	4				13	0	9.9776	By MS/MS	By MS/MS	By MS/MS	By matching	By MS/MS	By MS/MS	8.7
Q15907;P62491;P57735	Q15907;P62491	8;7;1	8;7;1	8;7;1	Ras-related protein Rab-11B;Ras-related protein Rab-11A	RAB11B;RAB11A	>Q15907 Ras-related protein Rab-11B OS=Homo sapiens OX=9606 GN=RAB11B PE=1 SV=4;>P62491 Ras-related protein Rab-11A OS=Homo sapiens OX=9606 GN=RAB11A PE=1 SV=3	3	8	8	8	7	7	4	7	7	6	7	7	4	7	7	6	7	7	4	7	7	6	44	44	44	24.488	218	218;216;213	2.75	8	10	20	13	0	110.95	By MS/MS	By MS/MS	By MS/MS	By MS/MS	By MS/MS	By MS/MS	40.4
Q15942	Q15942	3	3	3	Zyxin	ZYX	>Q15942 Zyxin OS=Homo sapiens OX=9606 GN=ZYX PE=1 SV=1	1	3	3	3	2	0	0	1	1	1	2	0	0	1	1	1	2	0	0	1	1	1	9.8	9.8	9.8	61.277	572	572	2.2	1	3		1	0	20.923	By MS/MS	By matching	By matching	By matching	By MS/MS	By matching	7.2
Q16181;Q6ZU15	Q16181	10;1	10;1	10;1	Septin-7	45542	>Q16181 Septin-7 OS=Homo sapiens OX=9606 GN=SEPT7 PE=1 SV=2	2	10	10	10	7	9	6	8	8	5	7	9	6	8	8	5	7	9	6	8	8	5	25.2	25.2	25.2	50.679	437	437;432	1.91	21	14	3	7	0	20.101	By MS/MS	By MS/MS	By MS/MS	By MS/MS	By MS/MS	By MS/MS	17.8
Q16222;Q3KQV9	Q16222	3;1	3;1	3;1	UDP-N-acetylhexosamine pyrophosphorylase;UDP-N-acetylgalactosamine pyrophosphorylase;UDP-N-acetylglucosamine pyrophosphorylase	UAP1	>Q16222 UDP-N-acetylhexosamine pyrophosphorylase OS=Homo sapiens OX=9606 GN=UAP1 PE=1 SV=3	2	3	3	3	2	3	2	2	2	2	2	3	2	2	2	2	2	3	2	2	2	2	6.7	6.7	6.7	58.768	522	522;507	1.69	6	6		1	0	17.101	By MS/MS	By MS/MS	By MS/MS	By matching	By MS/MS	By MS/MS	5.2
Q16270	Q16270	11	11	11	Insulin-like growth factor-binding protein 7	IGFBP7	>Q16270 Insulin-like growth factor-binding protein 7 OS=Homo sapiens OX=9606 GN=IGFBP7 PE=1 SV=1	1	11	11	11	11	6	5	11	9	10	11	6	5	11	9	10	11	6	5	11	9	10	44.7	44.7	44.7	29.13	282	282	2.65	20	13	18	26	0	227.15	By MS/MS	By MS/MS	By MS/MS	By MS/MS	By MS/MS	By MS/MS	44.7
Q16352	Q16352	4	3	3	Alpha-internexin	INA	>Q16352 Alpha-internexin OS=Homo sapiens OX=9606 GN=INA PE=1 SV=2	1	4	3	3	3	4	3	4	4	2	2	3	2	3	3	1	2	3	2	3	3	1	7.4	5.6	5.6	55.39	499	499	2.57	4	4		6	0	7.1	By MS/MS	By MS/MS	By MS/MS	By MS/MS	By MS/MS	By MS/MS	5.8
Q16363	Q16363	24	24	24	Laminin subunit alpha-4	LAMA4	>Q16363 Laminin subunit alpha-4 OS=Homo sapiens OX=9606 GN=LAMA4 PE=1 SV=4	1	24	24	24	0	0	0	8	8	24	0	0	0	8	8	24	0	0	0	8	8	24	17.9	17.9	17.9	202.52	1823	1823	3.04	8	3	17	21	0	184.79	By matching	By matching	By matching	By MS/MS	By MS/MS	By MS/MS	0
Q16394	Q16394	3	3	3	Exostosin-1	EXT1	>Q16394 Exostosin-1 OS=Homo sapiens OX=9606 GN=EXT1 PE=1 SV=2	1	3	3	3	2	2	2	1	3	2	2	2	2	1	3	2	2	2	2	1	3	2	4	4	4	86.254	746	746	3	4			8	0	4.0604	By matching	By matching	By matching	By MS/MS	By MS/MS	By MS/MS	2.9
Q16401	Q16401	5	5	5	26S proteasome non-ATPase regulatory subunit 5	PSMD5	>Q16401 26S proteasome non-ATPase regulatory subunit 5 OS=Homo sapiens OX=9606 GN=PSMD5 PE=1 SV=3	1	5	5	5	4	4	3	4	4	4	4	4	3	4	4	4	4	4	3	4	4	4	12.7	12.7	12.7	56.195	504	504	2.35	11	5		10	0	16.636	By MS/MS	By MS/MS	By MS/MS	By MS/MS	By MS/MS	By MS/MS	10.1
Q16531	Q16531	22	22	22	DNA damage-binding protein 1	DDB1	>Q16531 DNA damage-binding protein 1 OS=Homo sapiens OX=9606 GN=DDB1 PE=1 SV=1	1	22	22	22	18	17	11	14	18	17	18	17	11	14	18	17	18	17	11	14	18	17	21.1	21.1	21.1	126.97	1140	1140	2.88	7	34	28	35	0	77.497	By MS/MS	By MS/MS	By MS/MS	By MS/MS	By MS/MS	By MS/MS	18.6
Q16543	Q16543	5	5	5	Hsp90 co-chaperone Cdc37;Hsp90 co-chaperone Cdc37, N-terminally processed	CDC37	>Q16543 Hsp90 co-chaperone Cdc37 OS=Homo sapiens OX=9606 GN=CDC37 PE=1 SV=1	1	5	5	5	4	4	3	5	3	3	4	4	3	5	3	3	4	4	3	5	3	3	17.7	17.7	17.7	44.468	378	378	2.9		4	25	1	0	33.188	By MS/MS	By MS/MS	By MS/MS	By MS/MS	By MS/MS	By MS/MS	15.3
Q16555	Q16555	19	15	14	Dihydropyrimidinase-related protein 2	DPYSL2	>Q16555 Dihydropyrimidinase-related protein 2 OS=Homo sapiens OX=9606 GN=DPYSL2 PE=1 SV=1	1	19	15	14	18	16	17	17	16	14	14	12	13	13	12	11	13	11	12	12	11	10	48.8	39.9	37.6	62.293	572	572	3.07	9	11	75	39	0	241.62	By MS/MS	By MS/MS	By MS/MS	By MS/MS	By MS/MS	By MS/MS	44.9
Q16568	Q16568	2	2	2	Cocaine- and amphetamine-regulated transcript protein;CART(1-39);CART(42-89)	CARTPT	>Q16568 Cocaine- and amphetamine-regulated transcript protein OS=Homo sapiens OX=9606 GN=CARTPT PE=1 SV=1	1	2	2	2	2	1	1	1	1	1	2	1	1	1	1	1	2	1	1	1	1	1	23.3	23.3	23.3	12.829	116	116	3.75		1		7	0	3.6406	By MS/MS	By MS/MS	By MS/MS	By MS/MS	By MS/MS	By matching	23.3
Q16610	Q16610	14	14	14	Extracellular matrix protein 1	ECM1	>Q16610 Extracellular matrix protein 1 OS=Homo sapiens OX=9606 GN=ECM1 PE=1 SV=2	1	14	14	14	10	3	14	12	12	9	10	3	14	12	12	9	10	3	14	12	12	9	33.5	33.5	33.5	60.673	540	540	2.66	13	24	11	25	0	77.242	By MS/MS	By matching	By MS/MS	By MS/MS	By MS/MS	By MS/MS	23
Q16643	Q16643	5	5	5	Drebrin	DBN1	>Q16643 Drebrin OS=Homo sapiens OX=9606 GN=DBN1 PE=1 SV=4	1	5	5	5	3	1	2	2	3	1	3	1	2	2	3	1	3	1	2	2	3	1	12	12	12	71.428	649	649	2.57	1	8	1	4	0	126.44	By MS/MS	By MS/MS	By MS/MS	By MS/MS	By MS/MS	By MS/MS	8
Q16658	Q16658	14	14	14	Fascin	FSCN1	>Q16658 Fascin OS=Homo sapiens OX=9606 GN=FSCN1 PE=1 SV=3	1	14	14	14	9	9	5	13	12	8	9	9	5	13	12	8	9	9	5	13	12	8	31.6	31.6	31.6	54.529	493	493	2.87	7	9	39	14	0	73.11	By MS/MS	By MS/MS	By MS/MS	By MS/MS	By MS/MS	By MS/MS	20.9
Q16706	Q16706	5	5	5	Alpha-mannosidase 2	MAN2A1	>Q16706 Alpha-mannosidase 2 OS=Homo sapiens OX=9606 GN=MAN2A1 PE=1 SV=2	1	5	5	5	4	3	4	3	5	4	4	3	4	3	5	4	4	3	4	3	5	4	5.2	5.2	5.2	131.14	1144	1144	3.7			7	16	0	28.083	By MS/MS	By MS/MS	By MS/MS	By MS/MS	By MS/MS	By MS/MS	4
Q16762	Q16762	4	4	4	Thiosulfate sulfurtransferase	TST	>Q16762 Thiosulfate sulfurtransferase OS=Homo sapiens OX=9606 GN=TST PE=1 SV=4	1	4	4	4	2	3	3	4	3	3	2	3	3	4	3	3	2	3	3	4	3	3	13.8	13.8	13.8	33.429	297	297	3.17		6	3	9	0	16.755	By MS/MS	By MS/MS	By MS/MS	By MS/MS	By MS/MS	By MS/MS	7.4
Q16769	Q16769	5	5	5	Glutaminyl-peptide cyclotransferase	QPCT	>Q16769 Glutaminyl-peptide cyclotransferase OS=Homo sapiens OX=9606 GN=QPCT PE=1 SV=1	1	5	5	5	5	4	5	4	3	3	5	4	5	4	3	3	5	4	5	4	3	3	17.2	17.2	17.2	40.876	361	361	2.61	6	10	5	10	0	102.07	By MS/MS	By MS/MS	By MS/MS	By MS/MS	By MS/MS	By MS/MS	17.2
Q16775	Q16775	3	3	3	Hydroxyacylglutathione hydrolase, mitochondrial	HAGH	>Q16775 Hydroxyacylglutathione hydrolase, mitochondrial OS=Homo sapiens OX=9606 GN=HAGH PE=1 SV=2	1	3	3	3	3	3	3	3	3	3	3	3	3	3	3	3	3	3	3	3	3	3	12.7	12.7	12.7	33.805	308	308	2.8	8			12	0	7.0227	By MS/MS	By MS/MS	By MS/MS	By MS/MS	By MS/MS	By MS/MS	12.7
Q16787	Q16787	61	61	60	Laminin subunit alpha-3	LAMA3	>Q16787 Laminin subunit alpha-3 OS=Homo sapiens OX=9606 GN=LAMA3 PE=1 SV=2	1	61	61	60	57	51	60	2	1	1	57	51	60	2	1	1	56	51	59	2	1	1	20.8	20.8	20.6	366.65	3333	3333	2.55	57	64	57	67	0	323.31	By MS/MS	By MS/MS	By MS/MS	By MS/MS	By matching	By matching	20.3
Q16851	Q16851	14	14	14	UTP--glucose-1-phosphate uridylyltransferase	UGP2	>Q16851 UTP--glucose-1-phosphate uridylyltransferase OS=Homo sapiens OX=9606 GN=UGP2 PE=1 SV=5	1	14	14	14	7	11	6	13	8	9	7	11	6	13	8	9	7	11	6	13	8	9	35.4	35.4	35.4	56.94	508	508	3.06	6	4	34	20	0	99.231	By MS/MS	By MS/MS	By MS/MS	By MS/MS	By MS/MS	By MS/MS	17.3
Q16853;O75106	Q16853;O75106	2;1	2;1	2;1	Membrane primary amine oxidase;Retina-specific copper amine oxidase	AOC3;AOC2	>Q16853 Membrane primary amine oxidase OS=Homo sapiens OX=9606 GN=AOC3 PE=1 SV=3;>O75106 Retina-specific copper amine oxidase OS=Homo sapiens OX=9606 GN=AOC2 PE=1 SV=2	2	2	2	2	2	2	2	2	2	2	2	2	2	2	2	2	2	2	2	2	2	2	2.2	2.2	2.2	84.621	763	763;756	2.5		6	6		0	4.0068	By MS/MS	By MS/MS	By MS/MS	By MS/MS	By MS/MS	By MS/MS	2.2
Q16881	Q16881	13	13	13	Thioredoxin reductase 1, cytoplasmic	TXNRD1	>Q16881 Thioredoxin reductase 1, cytoplasmic OS=Homo sapiens OX=9606 GN=TXNRD1 PE=1 SV=3	1	13	13	13	5	6	2	9	12	12	5	6	2	9	12	12	5	6	2	9	12	12	24.7	24.7	24.7	70.905	649	649	2.43	21	4	17	14	0	31.185	By MS/MS	By MS/MS	By MS/MS	By MS/MS	By MS/MS	By MS/MS	7.7
Q1KMD3	Q1KMD3	7	7	7	Heterogeneous nuclear ribonucleoprotein U-like protein 2	HNRNPUL2	>Q1KMD3 Heterogeneous nuclear ribonucleoprotein U-like protein 2 OS=Homo sapiens OX=9606 GN=HNRNPUL2 PE=1 SV=1	1	7	7	7	5	5	1	3	4	4	5	5	1	3	4	4	5	5	1	3	4	4	13	13	13	85.104	747	747	3.18	1		15	6	0	34.799	By MS/MS	By MS/MS	By MS/MS	By MS/MS	By MS/MS	By MS/MS	9.9
Q2TAC2	Q2TAC2	3	2	2	Coiled-coil domain-containing protein 57	CCDC57	>Q2TAC2 Coiled-coil domain-containing protein 57 OS=Homo sapiens OX=9606 GN=CCDC57 PE=1 SV=2	1	3	2	2	3	2	3	3	3	3	2	1	2	2	2	2	2	1	2	2	2	2	3.7	2.9	2.9	103.17	916	916	3.09		5		6	0	4.0586	By MS/MS	By MS/MS	By MS/MS	By MS/MS	By matching	By matching	3.7
Q32MZ4	Q32MZ4	2	2	2	Leucine-rich repeat flightless-interacting protein 1	LRRFIP1	>Q32MZ4 Leucine-rich repeat flightless-interacting protein 1 OS=Homo sapiens OX=9606 GN=LRRFIP1 PE=1 SV=2	1	2	2	2	1	1	1	1	1	1	1	1	1	1	1	1	1	1	1	1	1	1	3	3	3	89.252	808	808	1.83	1	5			0.0017889	2.249	By MS/MS	By matching	By matching	By matching	By MS/MS	By matching	1.4
Q32P28	Q32P28	7	7	7	Prolyl 3-hydroxylase 1	LEPRE1	>Q32P28 Prolyl 3-hydroxylase 1 OS=Homo sapiens OX=9606 GN=P3H1 PE=1 SV=2	1	7	7	7	2	4	0	6	6	6	2	4	0	6	6	6	2	4	0	6	6	6	12.2	12.2	12.2	83.393	736	736	2.28	3	17		5	0	47.658	By matching	By MS/MS	By matching	By MS/MS	By MS/MS	By MS/MS	3.7
Q3LXA3	Q3LXA3	3	3	3	Bifunctional ATP-dependent dihydroxyacetone kinase/FAD-AMP lyase (cyclizing);ATP-dependent dihydroxyacetone kinase;FAD-AMP lyase (cyclizing)	DAK	>Q3LXA3 Triokinase/FMN cyclase OS=Homo sapiens OX=9606 GN=TKFC PE=1 SV=2	1	3	3	3	3	3	3	3	3	3	3	3	3	3	3	3	3	3	3	3	3	3	7.5	7.5	7.5	58.946	575	575	3.4	6			24	0	14.153	By MS/MS	By MS/MS	By MS/MS	By MS/MS	By MS/MS	By MS/MS	7.5
Q4G0P3	Q4G0P3	3	3	3	Hydrocephalus-inducing protein homolog	HYDIN	>Q4G0P3 Hydrocephalus-inducing protein homolog OS=Homo sapiens OX=9606 GN=HYDIN PE=1 SV=3	1	3	3	3	1	1	0	1	1	2	1	1	0	1	1	2	1	1	0	1	1	2	0.6	0.6	0.6	575.89	5121	5121	3.5		1	1	4	0	3.0965	By MS/MS	By MS/MS	By matching	By MS/MS	By MS/MS	By MS/MS	0.2
Q4LDE5	Q4LDE5	12	12	12	Sushi, von Willebrand factor type A, EGF and pentraxin domain-containing protein 1	SVEP1	>Q4LDE5 Sushi, von Willebrand factor type A, EGF and pentraxin domain-containing protein 1 OS=Homo sapiens OX=9606 GN=SVEP1 PE=1 SV=3	1	12	12	12	0	1	0	3	4	12	0	1	0	3	4	12	0	1	0	3	4	12	4.3	4.3	4.3	390.17	3571	3571	2.83	4	4	7	8	0	35.697	By matching	By matching	By matching	By MS/MS	By MS/MS	By MS/MS	0
Q4V328	Q4V328	2	2	2	GRIP1-associated protein 1	GRIPAP1	>Q4V328 GRIP1-associated protein 1 OS=Homo sapiens OX=9606 GN=GRIPAP1 PE=1 SV=1	1	2	2	2	1	2	2	1	1	2	1	2	2	1	1	2	1	2	2	1	1	2	2.3	2.3	2.3	95.988	841	841	1.67	3	6			0.001791	2.2536	By matching	By MS/MS	By matching	By MS/MS	By matching	By matching	1
Q53EL6	Q53EL6	3	3	3	Programmed cell death protein 4	PDCD4	>Q53EL6 Programmed cell death protein 4 OS=Homo sapiens OX=9606 GN=PDCD4 PE=1 SV=2	1	3	3	3	2	2	0	2	2	2	2	2	0	2	2	2	2	2	0	2	2	2	9	9	9	51.735	469	469	1.91	2	8	1		0	6.8068	By MS/MS	By MS/MS	By matching	By MS/MS	By MS/MS	By MS/MS	4.1
Q53FA7	Q53FA7	4	4	4	Quinone oxidoreductase PIG3	TP53I3	>Q53FA7 Quinone oxidoreductase PIG3 OS=Homo sapiens OX=9606 GN=TP53I3 PE=1 SV=2	1	4	4	4	3	4	2	2	1	1	3	4	2	2	1	1	3	4	2	2	1	1	12	12	12	35.536	332	332	3.46	1	2		10	0	5.2239	By MS/MS	By MS/MS	By MS/MS	By MS/MS	By matching	By matching	9.3
Q5JSH3	Q5JSH3	2	2	2	WD repeat-containing protein 44	WDR44	>Q5JSH3 WD repeat-containing protein 44 OS=Homo sapiens OX=9606 GN=WDR44 PE=1 SV=1	1	2	2	2	1	0	0	0	1	0	1	0	0	0	1	0	1	0	0	0	1	0	2.8	2.8	2.8	101.37	913	913	2	1		1		0.0022472	1.9131	By MS/MS	By matching	By matching	By matching	By MS/MS	By matching	1.5
Q5T5C0	Q5T5C0	2	2	2	Syntaxin-binding protein 5	STXBP5	>Q5T5C0 Syntaxin-binding protein 5 OS=Homo sapiens OX=9606 GN=STXBP5 PE=1 SV=1	1	2	2	2	1	1	1	0	1	1	1	1	1	0	1	1	1	1	1	0	1	1	1.7	1.7	1.7	127.57	1151	1151	3.4	1			4	0.00062814	2.6007	By MS/MS	By MS/MS	By MS/MS	By matching	By MS/MS	By MS/MS	1
Q5TCQ9	Q5TCQ9	2	2	2	Membrane-associated guanylate kinase, WW and PDZ domain-containing protein 3	MAGI3	>Q5TCQ9 Membrane-associated guanylate kinase, WW and PDZ domain-containing protein 3 OS=Homo sapiens OX=9606 GN=MAGI3 PE=1 SV=3	1	2	2	2	1	1	1	1	2	1	1	1	1	1	2	1	1	1	1	1	2	1	1.4	1.4	1.4	162.95	1481	1481	3.57	1			6	0.0038189	1.7481	By matching	By matching	By matching	By matching	By MS/MS	By matching	0.7
Q5TZA2	Q5TZA2	2	2	2	Rootletin	CROCC	>Q5TZA2 Rootletin OS=Homo sapiens OX=9606 GN=CROCC PE=1 SV=1	1	2	2	2	2	1	1	1	1	1	2	1	1	1	1	1	2	1	1	1	1	1	1	1	1	228.52	2017	2017	2		8			0	13.61	By MS/MS	By MS/MS	By MS/MS	By MS/MS	By MS/MS	By MS/MS	1
Q641Q3	Q641Q3	3	3	3	Meteorin-like protein	METRNL	>Q641Q3 Meteorin-like protein OS=Homo sapiens OX=9606 GN=METRNL PE=2 SV=1	1	3	3	3	0	0	1	3	2	1	0	0	1	3	2	1	0	0	1	3	2	1	10.6	10.6	10.6	34.398	311	311	2.43		4	3		0	3.2541	By matching	By matching	By matching	By MS/MS	By MS/MS	By MS/MS	0
Q66K79	Q66K79	2	2	2	Carboxypeptidase Z	CPZ	>Q66K79 Carboxypeptidase Z OS=Homo sapiens OX=9606 GN=CPZ PE=1 SV=2	1	2	2	2	2	0	0	0	1	0	2	0	0	0	1	0	2	0	0	0	1	0	5.4	5.4	5.4	73.655	652	652	3.67			1	2	0	4.7925	By MS/MS	By matching	By matching	By matching	By matching	By matching	5.4
Q6DN12	Q6DN12	2	2	2	Multiple C2 and transmembrane domain-containing protein 2	MCTP2	>Q6DN12 Multiple C2 and transmembrane domain-containing protein 2 OS=Homo sapiens OX=9606 GN=MCTP2 PE=1 SV=3	1	2	2	2	2	2	2	1	1	1	2	2	2	1	1	1	2	2	2	1	1	1	2.5	2.5	2.5	99.594	878	878	1.93	1	13			0.0093458	1.4917	By MS/MS	By MS/MS	By MS/MS	By matching	By MS/MS	By matching	2.5
Q6EMK4	Q6EMK4	6	6	6	Vasorin	VASN	>Q6EMK4 Vasorin OS=Homo sapiens OX=9606 GN=VASN PE=1 SV=1	1	6	6	6	4	2	0	5	6	5	4	2	0	5	6	5	4	2	0	5	6	5	11.9	11.9	11.9	71.712	673	673	2.74	6	3	5	9	0	52.474	By MS/MS	By MS/MS	By matching	By MS/MS	By MS/MS	By MS/MS	8.2
Q6IBS0	Q6IBS0	6	6	5	Twinfilin-2	TWF2	>Q6IBS0 Twinfilin-2 OS=Homo sapiens OX=9606 GN=TWF2 PE=1 SV=2	1	6	6	5	1	3	2	4	3	2	1	3	2	4	3	2	0	2	1	3	2	1	19.8	19.8	17.8	39.548	349	349	2.44	1	8	9		0	29.168	By matching	By MS/MS	By MS/MS	By MS/MS	By MS/MS	By MS/MS	2
Q6KF10	Q6KF10	2	2	2	Growth/differentiation factor 6	GDF6	>Q6KF10 Growth/differentiation factor 6 OS=Homo sapiens OX=9606 GN=GDF6 PE=1 SV=1	1	2	2	2	0	0	0	1	2	1	0	0	0	1	2	1	0	0	0	1	2	1	5.5	5.5	5.5	50.661	455	455	1.5	3		1		0	3.5014	By matching	By matching	By matching	By MS/MS	By MS/MS	By matching	0
Q6NZI2	Q6NZI2	2	2	2	Polymerase I and transcript release factor	PTRF	>Q6NZI2 Caveolae-associated protein 1 OS=Homo sapiens OX=9606 GN=CAVIN1 PE=1 SV=1	1	2	2	2	2	2	1	1	2	1	2	2	1	1	2	1	2	2	1	1	2	1	6.7	6.7	6.7	43.476	390	390	2.75		5	5	2	0	4.6757	By MS/MS	By MS/MS	By matching	By matching	By MS/MS	By MS/MS	6.7
Q6P1N9	Q6P1N9	2	2	2	Putative deoxyribonuclease TATDN1	TATDN1	>Q6P1N9 Putative deoxyribonuclease TATDN1 OS=Homo sapiens OX=9606 GN=TATDN1 PE=1 SV=2	1	2	2	2	1	1	0	1	1	2	1	1	0	1	1	2	1	1	0	1	1	2	10.1	10.1	10.1	33.601	297	297	3			9		0	3.1658	By MS/MS	By MS/MS	By matching	By MS/MS	By MS/MS	By MS/MS	4.4
Q96GK7;Q6P2I3	Q96GK7;Q6P2I3	3;3	3;3	3;3	Fumarylacetoacetate hydrolase domain-containing protein 2A;Fumarylacetoacetate hydrolase domain-containing protein 2B	FAHD2A;FAHD2B	>Q96GK7 Fumarylacetoacetate hydrolase domain-containing protein 2A OS=Homo sapiens OX=9606 GN=FAHD2A PE=1 SV=1;>Q6P2I3 Fumarylacetoacetate hydrolase domain-containing protein 2B OS=Homo sapiens OX=9606 GN=FAHD2B PE=1 SV=1	2	3	3	3	3	2	2	3	1	2	3	2	2	3	1	2	3	2	2	3	1	2	16.9	16.9	16.9	34.596	314	314;314	3.7		3		17	0	49.23	By MS/MS	By MS/MS	By MS/MS	By MS/MS	By MS/MS	By MS/MS	16.9
Q6PCB0	Q6PCB0	2	2	2	von Willebrand factor A domain-containing protein 1	VWA1	>Q6PCB0 von Willebrand factor A domain-containing protein 1 OS=Homo sapiens OX=9606 GN=VWA1 PE=1 SV=1	1	2	2	2	2	0	1	0	0	0	2	0	1	0	0	0	2	0	1	0	0	0	5.8	5.8	5.8	46.804	445	445	1.67	2		1		0	3.3275	By MS/MS	By matching	By MS/MS	By matching	By matching	By matching	5.8
Q6PCE3	Q6PCE3	2	2	2	Glucose 1,6-bisphosphate synthase	PGM2L1	>Q6PCE3 Glucose 1,6-bisphosphate synthase OS=Homo sapiens OX=9606 GN=PGM2L1 PE=1 SV=3	1	2	2	2	2	1	0	2	0	0	2	1	0	2	0	0	2	1	0	2	0	0	2.7	2.7	2.7	70.441	622	622	2.67		4		2	0.0012469	2.5344	By MS/MS	By MS/MS	By matching	By matching	By matching	By matching	2.7
Q6UVK1	Q6UVK1	4	4	4	Chondroitin sulfate proteoglycan 4	CSPG4	>Q6UVK1 Chondroitin sulfate proteoglycan 4 OS=Homo sapiens OX=9606 GN=CSPG4 PE=1 SV=2	1	4	4	4	0	1	0	1	2	4	0	1	0	1	2	4	0	1	0	1	2	4	2.7	2.7	2.7	250.53	2322	2322	2.12	3	1	4		0	6.0893	By matching	By matching	By matching	By MS/MS	By matching	By MS/MS	0
Q6UWH4	Q6UWH4	3	3	3	Protein FAM198B	FAM198B	>Q6UWH4 Protein FAM198B OS=Homo sapiens OX=9606 GN=FAM198B PE=2 SV=1	1	3	3	3	1	0	1	1	3	3	1	0	1	1	3	3	1	0	1	1	3	3	7.3	7.3	7.3	57.552	519	519	3.78			2	7	0	9.7528	By matching	By matching	By matching	By matching	By MS/MS	By MS/MS	3.1
Q6UWP2	Q6UWP2	2	2	2	Dehydrogenase/reductase SDR family member 11	DHRS11	>Q6UWP2 Dehydrogenase/reductase SDR family member 11 OS=Homo sapiens OX=9606 GN=DHRS11 PE=1 SV=1	1	2	2	2	0	2	0	1	1	0	0	2	0	1	1	0	0	2	0	1	1	0	8.1	8.1	8.1	28.308	260	260	2.25		3	1		0	3.7978	By matching	By MS/MS	By matching	By MS/MS	By MS/MS	By matching	0
Q6UX71	Q6UX71	2	2	2	Plexin domain-containing protein 2	PLXDC2	>Q6UX71 Plexin domain-containing protein 2 OS=Homo sapiens OX=9606 GN=PLXDC2 PE=1 SV=1	1	2	2	2	1	2	0	1	2	2	1	2	0	1	2	2	1	2	0	1	2	2	4.2	4.2	4.2	59.582	529	529	4				9	0.0074074	1.5815	By matching	By MS/MS	By matching	By MS/MS	By MS/MS	By matching	1.9
Q6UXH1	Q6UXH1	2	2	2	Cysteine-rich with EGF-like domain protein 2	CRELD2	>Q6UXH1 Cysteine-rich with EGF-like domain protein 2 OS=Homo sapiens OX=9606 GN=CRELD2 PE=1 SV=1	1	2	2	2	1	2	1	1	1	2	1	2	1	1	1	2	1	2	1	1	1	2	6.2	6.2	6.2	38.191	353	353	1.88	1	7			0	3.2566	By MS/MS	By MS/MS	By MS/MS	By MS/MS	By matching	By MS/MS	2.8
Q6UXH9	Q6UXH9	6	6	6	Inactive serine protease PAMR1	PAMR1	>Q6UXH9 Inactive serine protease PAMR1 OS=Homo sapiens OX=9606 GN=PAMR1 PE=1 SV=1	1	6	6	6	0	0	1	0	6	5	0	0	1	0	6	5	0	0	1	0	6	5	11	11	11	80.198	720	720	2.53	4	1	8	2	0	12.988	By matching	By matching	By matching	By matching	By MS/MS	By MS/MS	0
Q6YHK3	Q6YHK3	14	14	14	CD109 antigen	CD109	>Q6YHK3 CD109 antigen OS=Homo sapiens OX=9606 GN=CD109 PE=1 SV=2	1	14	14	14	7	6	12	10	7	10	7	6	12	10	7	10	7	6	12	10	7	10	13	13	13	161.69	1445	1445	2.75	13	15	11	25	0	84.941	By MS/MS	By MS/MS	By MS/MS	By MS/MS	By MS/MS	By MS/MS	6.2
Q6ZVM7	Q6ZVM7	2	2	2	TOM1-like protein 2	TOM1L2	>Q6ZVM7 TOM1-like protein 2 OS=Homo sapiens OX=9606 GN=TOM1L2 PE=1 SV=1	1	2	2	2	2	2	2	2	2	2	2	2	2	2	2	2	2	2	2	2	2	2	4.7	4.7	4.7	55.556	507	507	2	6		6		0	5.6968	By matching	By MS/MS	By matching	By MS/MS	By MS/MS	By matching	4.7
Q71UM5;P42677	Q71UM5;P42677	2;1	2;1	2;1	40S ribosomal protein S27-like;40S ribosomal protein S27	RPS27L;RPS27	>Q71UM5 40S ribosomal protein S27-like OS=Homo sapiens OX=9606 GN=RPS27L PE=1 SV=3;>P42677 40S ribosomal protein S27 OS=Homo sapiens OX=9606 GN=RPS27 PE=1 SV=3	2	2	2	2	2	1	1	2	2	1	2	1	1	2	2	1	2	1	1	2	2	1	22.6	22.6	22.6	9.4771	84	84;84	1.67	3	6			0	3.0926	By MS/MS	By MS/MS	By MS/MS	By MS/MS	By MS/MS	By matching	22.6
Q76M96	Q76M96	23	23	23	Coiled-coil domain-containing protein 80	CCDC80	>Q76M96 Coiled-coil domain-containing protein 80 OS=Homo sapiens OX=9606 GN=CCDC80 PE=1 SV=1	1	23	23	23	22	19	21	21	11	14	22	19	21	21	11	14	22	19	21	21	11	14	28.7	28.7	28.7	108.17	950	950	2.46	51	21	51	37	0	323.31	By MS/MS	By MS/MS	By MS/MS	By MS/MS	By MS/MS	By MS/MS	28
Q7KZF4	Q7KZF4	11	11	11	Staphylococcal nuclease domain-containing protein 1	SND1	>Q7KZF4 Staphylococcal nuclease domain-containing protein 1 OS=Homo sapiens OX=9606 GN=SND1 PE=1 SV=1	1	11	11	11	9	7	5	10	8	5	9	7	5	10	8	5	9	7	5	10	8	5	16.7	16.7	16.7	102	910	910	3.15	1	13	12	22	0	58.16	By MS/MS	By MS/MS	By MS/MS	By MS/MS	By MS/MS	By MS/MS	14.2
Q7L1Q6	Q7L1Q6	2	2	2	Basic leucine zipper and W2 domain-containing protein 1	BZW1	>Q7L1Q6 Basic leucine zipper and W2 domain-containing protein 1 OS=Homo sapiens OX=9606 GN=BZW1 PE=1 SV=1	1	2	2	2	2	2	2	1	2	2	2	2	2	1	2	2	2	2	2	1	2	2	4.5	4.5	4.5	48.043	419	419	1.83	7		5		0	3.0023	By MS/MS	By MS/MS	By MS/MS	By MS/MS	By MS/MS	By MS/MS	4.5
Q7L2H7	Q7L2H7	3	3	3	Eukaryotic translation initiation factor 3 subunit M	EIF3M	>Q7L2H7 Eukaryotic translation initiation factor 3 subunit M OS=Homo sapiens OX=9606 GN=EIF3M PE=1 SV=1	1	3	3	3	1	1	0	1	2	2	1	1	0	1	2	2	1	1	0	1	2	2	10.4	10.4	10.4	42.502	374	374	2.71		4	1	2	0	4.0701	By MS/MS	By matching	By matching	By matching	By MS/MS	By matching	2.7
Q7L5N1	Q7L5N1	6	6	6	COP9 signalosome complex subunit 6	COPS6	>Q7L5N1 COP9 signalosome complex subunit 6 OS=Homo sapiens OX=9606 GN=COPS6 PE=1 SV=1	1	6	6	6	5	5	1	5	4	4	5	5	1	5	4	4	5	5	1	5	4	4	23.2	23.2	23.2	36.163	327	327	2.96	2	3	13	6	0	14.101	By MS/MS	By MS/MS	By matching	By MS/MS	By MS/MS	By MS/MS	19.9
Q7Z304	Q7Z304	7	7	7	MAM domain-containing protein 2	MAMDC2	>Q7Z304 MAM domain-containing protein 2 OS=Homo sapiens OX=9606 GN=MAMDC2 PE=2 SV=3	1	7	7	7	4	1	0	2	7	2	4	1	0	2	7	2	4	1	0	2	7	2	13	13	13	77.555	686	686	2.59	1	6	9	1	0	60.128	By MS/MS	By matching	By matching	By MS/MS	By MS/MS	By MS/MS	8.5
Q7Z406	Q7Z406	9	3	3	Myosin-14	MYH14	>Q7Z406 Myosin-14 OS=Homo sapiens OX=9606 GN=MYH14 PE=1 SV=2	1	9	3	3	4	4	0	7	9	7	1	1	0	2	3	3	1	1	0	2	3	3	4.8	1.7	1.7	227.87	1995	1995	2.5		5	5		0	3.493	By MS/MS	By MS/MS	By matching	By MS/MS	By MS/MS	By MS/MS	1.6
Q7Z4W1	Q7Z4W1	2	2	2	L-xylulose reductase	DCXR	>Q7Z4W1 L-xylulose reductase OS=Homo sapiens OX=9606 GN=DCXR PE=1 SV=2	1	2	2	2	1	1	1	2	1	1	1	1	1	2	1	1	1	1	1	2	1	1	9.4	9.4	9.4	25.913	244	244	3.89			1	8	0	9.1533	By matching	By MS/MS	By matching	By MS/MS	By MS/MS	By MS/MS	4.5
Q7Z6Z7	Q7Z6Z7	9	9	9	E3 ubiquitin-protein ligase HUWE1	HUWE1	>Q7Z6Z7 E3 ubiquitin-protein ligase HUWE1 OS=Homo sapiens OX=9606 GN=HUWE1 PE=1 SV=3	1	9	9	9	4	6	3	6	5	3	4	6	3	6	5	3	4	6	3	6	5	3	2.4	2.4	2.4	481.89	4374	4374	2.79	11		1	16	0	10.817	By MS/MS	By MS/MS	By matching	By MS/MS	By MS/MS	By MS/MS	1.1
Q7Z7G0	Q7Z7G0	5	5	5	Target of Nesh-SH3	ABI3BP	>Q7Z7G0 Target of Nesh-SH3 OS=Homo sapiens OX=9606 GN=ABI3BP PE=1 SV=1	1	5	5	5	0	0	1	0	0	5	0	0	1	0	0	5	0	0	1	0	0	5	5.3	5.3	5.3	118.64	1075	1075	2	3		3		0	6.7782	By matching	By matching	By matching	By matching	By matching	By MS/MS	0
Q7Z7M9	Q7Z7M9	6	6	6	Polypeptide N-acetylgalactosaminyltransferase 5	GALNT5	>Q7Z7M9 Polypeptide N-acetylgalactosaminyltransferase 5 OS=Homo sapiens OX=9606 GN=GALNT5 PE=1 SV=1	1	6	6	6	2	2	6	1	2	4	2	2	6	1	2	4	2	2	6	1	2	4	7.2	7.2	7.2	106.26	940	940	2.83		5	11	2	0	17.099	By matching	By matching	By MS/MS	By matching	By MS/MS	By MS/MS	2
Q86SR1	Q86SR1	2	2	2	Polypeptide N-acetylgalactosaminyltransferase 10	GALNT10	>Q86SR1 Polypeptide N-acetylgalactosaminyltransferase 10 OS=Homo sapiens OX=9606 GN=GALNT10 PE=1 SV=2	1	2	2	2	1	2	1	0	1	0	1	2	1	0	1	0	1	2	1	0	1	0	4.1	4.1	4.1	68.991	603	603	3			5		0	5.1102	By MS/MS	By MS/MS	By MS/MS	By matching	By MS/MS	By matching	1.5
Q86UP2	Q86UP2	19	19	19	Kinectin	KTN1	>Q86UP2 Kinectin OS=Homo sapiens OX=9606 GN=KTN1 PE=1 SV=1	1	19	19	19	13	15	11	14	12	15	13	15	11	14	12	15	13	15	11	14	12	15	16.1	16.1	16.1	156.27	1357	1357	2.26	30	29	24	16	0	141.33	By MS/MS	By MS/MS	By MS/MS	By MS/MS	By MS/MS	By MS/MS	11.2
Q86VP6	Q86VP6	13	13	13	Cullin-associated NEDD8-dissociated protein 1	CAND1	>Q86VP6 Cullin-associated NEDD8-dissociated protein 1 OS=Homo sapiens OX=9606 GN=CAND1 PE=1 SV=2	1	13	13	13	8	10	8	10	12	8	8	10	8	10	12	8	8	10	8	10	12	8	12.8	12.8	12.8	136.37	1230	1230	3.22	6	4	24	30	0	88.388	By MS/MS	By MS/MS	By MS/MS	By MS/MS	By MS/MS	By MS/MS	7.6
Q86VS8	Q86VS8	2	2	2	Protein Hook homolog 3	HOOK3	>Q86VS8 Protein Hook homolog 3 OS=Homo sapiens OX=9606 GN=HOOK3 PE=1 SV=2	1	2	2	2	0	2	0	2	0	0	0	2	0	2	0	0	0	2	0	2	0	0	4	4	4	83.125	718	718	2	2		2		0	3.6565	By matching	By MS/MS	By matching	By matching	By matching	By matching	0
Q86X29	Q86X29	2	2	2	Lipolysis-stimulated lipoprotein receptor	LSR	>Q86X29 Lipolysis-stimulated lipoprotein receptor OS=Homo sapiens OX=9606 GN=LSR PE=1 SV=4	1	2	2	2	1	0	2	0	0	0	1	0	2	0	0	0	1	0	2	0	0	0	3.4	3.4	3.4	71.438	649	649	1	3				0	4.3307	By MS/MS	By matching	By MS/MS	By matching	By matching	By matching	1.7
Q86Y38	Q86Y38	10	10	10	Xylosyltransferase 1	XYLT1	>Q86Y38 Xylosyltransferase 1 OS=Homo sapiens OX=9606 GN=XYLT1 PE=1 SV=1	1	10	10	10	0	2	0	10	8	6	0	2	0	10	8	6	0	2	0	10	8	6	12.6	12.6	12.6	107.57	959	959	3	3	6	6	12	0	45.762	By matching	By matching	By matching	By MS/MS	By MS/MS	By MS/MS	0
Q86Y82	Q86Y82	3	3	3	Syntaxin-12	STX12	>Q86Y82 Syntaxin-12 OS=Homo sapiens OX=9606 GN=STX12 PE=1 SV=1	1	3	3	3	2	2	1	2	2	1	2	2	1	2	2	1	2	2	1	2	2	1	14.5	14.5	14.5	31.642	276	276	3.82		1		10	0	37.161	By MS/MS	By MS/MS	By matching	By MS/MS	By MS/MS	By MS/MS	11.2
Q8IUX7	Q8IUX7	12	12	11	Adipocyte enhancer-binding protein 1	AEBP1	>Q8IUX7 Adipocyte enhancer-binding protein 1 OS=Homo sapiens OX=9606 GN=AEBP1 PE=1 SV=1	1	12	12	11	2	4	2	5	3	12	2	4	2	5	3	12	1	3	1	4	2	11	14.2	14.2	13.5	130.93	1158	1158	3.1	3	6	7	15	0	116.26	By MS/MS	By MS/MS	By MS/MS	By MS/MS	By MS/MS	By MS/MS	1.8
Q8IV08	Q8IV08	4	4	4	Phospholipase D3	PLD3	>Q8IV08 Phospholipase D3 OS=Homo sapiens OX=9606 GN=PLD3 PE=1 SV=1	1	4	4	4	3	3	3	4	4	3	3	3	3	4	4	3	3	3	3	4	4	3	8.4	8.4	8.4	54.705	490	490	3.44			14	11	0	10.639	By MS/MS	By MS/MS	By MS/MS	By MS/MS	By MS/MS	By MS/MS	5.9
Q8IWE2	Q8IWE2	2	2	2	Protein NOXP20	FAM114A1	>Q8IWE2 Protein NOXP20 OS=Homo sapiens OX=9606 GN=FAM114A1 PE=1 SV=2	1	2	2	2	2	2	2	2	2	1	2	2	2	2	2	1	2	2	2	2	2	1	5	5	5	60.741	563	563	2.62		11		5	0	48.644	By MS/MS	By MS/MS	By MS/MS	By MS/MS	By MS/MS	By MS/MS	5
Q8IWU5	Q8IWU5	3	3	3	Extracellular sulfatase Sulf-2	SULF2	>Q8IWU5 Extracellular sulfatase Sulf-2 OS=Homo sapiens OX=9606 GN=SULF2 PE=1 SV=1	1	3	3	3	2	0	1	0	3	0	2	0	1	0	3	0	2	0	1	0	3	0	3.7	3.7	3.7	100.45	870	870	2.43	2		5		0	4.6046	By MS/MS	By matching	By MS/MS	By matching	By MS/MS	By matching	2.6
Q8N129	Q8N129	2	2	2	Protein canopy homolog 4	CNPY4	>Q8N129 Protein canopy homolog 4 OS=Homo sapiens OX=9606 GN=CNPY4 PE=2 SV=1	1	2	2	2	2	2	0	2	1	1	2	2	0	2	1	1	2	2	0	2	1	1	8.5	8.5	8.5	28.309	248	248	2.7		3	7		0	6.402	By MS/MS	By MS/MS	By matching	By MS/MS	By MS/MS	By MS/MS	8.5
Q8N2H3	Q8N2H3	2	2	2	Pyridine nucleotide-disulfide oxidoreductase domain-containing protein 2	PYROXD2	>Q8N2H3 Pyridine nucleotide-disulfide oxidoreductase domain-containing protein 2 OS=Homo sapiens OX=9606 GN=PYROXD2 PE=1 SV=2	1	2	2	2	2	2	2	2	2	1	2	2	2	2	2	1	2	2	2	2	2	1	3.4	3.4	3.4	63.067	581	581	3.09		5		6	0.0023095	2.0646	By MS/MS	By matching	By MS/MS	By matching	By MS/MS	By MS/MS	3.4
Q8N3F0	Q8N3F0	2	2	2	Maturin	MTURN	>Q8N3F0 Maturin OS=Homo sapiens OX=9606 GN=MTURN PE=1 SV=2	1	2	2	2	1	2	1	2	1	1	1	2	1	2	1	1	1	2	1	2	1	1	22.1	22.1	22.1	14.925	131	131	3.11			8	1	0	6.629	By MS/MS	By MS/MS	By matching	By MS/MS	By MS/MS	By MS/MS	9.2
Q8N436	Q8N436	7	6	6	Inactive carboxypeptidase-like protein X2	CPXM2	>Q8N436 Inactive carboxypeptidase-like protein X2 OS=Homo sapiens OX=9606 GN=CPXM2 PE=2 SV=3	1	7	6	6	6	2	7	1	1	1	5	1	6	0	0	0	5	1	6	0	0	0	9.9	8.7	8.7	85.869	756	756	2.92	3		4	5	0	11.355	By MS/MS	By matching	By MS/MS	By matching	By matching	By matching	8.7
Q8N474	Q8N474	7	7	7	Secreted frizzled-related protein 1	SFRP1	>Q8N474 Secreted frizzled-related protein 1 OS=Homo sapiens OX=9606 GN=SFRP1 PE=1 SV=1	1	7	7	7	7	3	4	0	1	2	7	3	4	0	1	2	7	3	4	0	1	2	27.1	27.1	27.1	35.385	314	314	3.68			7	15	0	16.804	By MS/MS	By MS/MS	By MS/MS	By matching	By matching	By MS/MS	27.1
Q8N6C5	Q8N6C5	4	4	4	Immunoglobulin superfamily member 1	IGSF1	>Q8N6C5 Immunoglobulin superfamily member 1 OS=Homo sapiens OX=9606 GN=IGSF1 PE=1 SV=3	1	4	4	4	4	4	4	4	4	4	4	4	4	4	4	4	4	4	4	4	4	4	2.8	2.8	2.8	148.93	1336	1336	2.23	6	8	12		0	13.925	By MS/MS	By MS/MS	By MS/MS	By MS/MS	By MS/MS	By MS/MS	2.8
Q8N6Y2	Q8N6Y2	2	2	2	Leucine-rich repeat-containing protein 17	LRRC17	>Q8N6Y2 Leucine-rich repeat-containing protein 17 OS=Homo sapiens OX=9606 GN=LRRC17 PE=2 SV=1	1	2	2	2	0	0	2	2	2	1	0	0	2	2	2	1	0	0	2	2	2	1	6.3	6.3	6.3	51.799	441	441	2	6			3	0	5.1427	By matching	By matching	By matching	By MS/MS	By MS/MS	By matching	0
Q8N8S7	Q8N8S7	3	3	3	Protein enabled homolog	ENAH	>Q8N8S7 Protein enabled homolog OS=Homo sapiens OX=9606 GN=ENAH PE=1 SV=2	1	3	3	3	2	2	2	2	3	1	2	2	2	2	3	1	2	2	2	2	3	1	5.9	5.9	5.9	66.509	591	591	2.46	5		5	3	0	5.9097	By MS/MS	By matching	By MS/MS	By matching	By MS/MS	By matching	3.7
Q8N8U9	Q8N8U9	2	2	2	BMP-binding endothelial regulator protein	BMPER	>Q8N8U9 BMP-binding endothelial regulator protein OS=Homo sapiens OX=9606 GN=BMPER PE=1 SV=3	1	2	2	2	0	0	0	2	1	1	0	0	0	2	1	1	0	0	0	2	1	1	3.4	3.4	3.4	75.996	685	685	3			4		0	3.8391	By matching	By matching	By matching	By MS/MS	By matching	By MS/MS	0
Q8NBF2	Q8NBF2	2	2	2	NHL repeat-containing protein 2	NHLRC2	>Q8NBF2 NHL repeat-containing protein 2 OS=Homo sapiens OX=9606 GN=NHLRC2 PE=1 SV=1	1	2	2	2	1	2	1	1	1	1	1	2	1	1	1	1	1	2	1	1	1	1	3.2	3.2	3.2	79.443	726	726	2.85	1		12		0	2.8996	By MS/MS	By MS/MS	By MS/MS	By MS/MS	By MS/MS	By MS/MS	1.4
Q8NBJ4	Q8NBJ4	10	10	10	Golgi membrane protein 1	GOLM1	>Q8NBJ4 Golgi membrane protein 1 OS=Homo sapiens OX=9606 GN=GOLM1 PE=1 SV=1	1	10	10	10	7	3	6	5	8	7	7	3	6	5	8	7	7	3	6	5	8	7	30.2	30.2	30.2	45.333	401	401	2	9	19	7	1	0	47.028	By MS/MS	By MS/MS	By MS/MS	By MS/MS	By MS/MS	By MS/MS	19.5
Q8NBL1	Q8NBL1	2	2	2	Protein O-glucosyltransferase 1	POGLUT1	>Q8NBL1 Protein O-glucosyltransferase 1 OS=Homo sapiens OX=9606 GN=POGLUT1 PE=1 SV=1	1	2	2	2	1	1	1	1	2	2	1	1	1	1	2	2	1	1	1	1	2	2	5.6	5.6	5.6	46.189	392	392	4				12	0	3.8213	By MS/MS	By MS/MS	By MS/MS	By MS/MS	By MS/MS	By MS/MS	2
Q8NBS9	Q8NBS9	10	10	10	Thioredoxin domain-containing protein 5	TXNDC5	>Q8NBS9 Thioredoxin domain-containing protein 5 OS=Homo sapiens OX=9606 GN=TXNDC5 PE=1 SV=2	1	10	10	10	3	5	1	8	10	8	3	5	1	8	10	8	3	5	1	8	10	8	30.1	30.1	30.1	47.628	432	432	2.44	11	10	8	10	0	108.8	By MS/MS	By MS/MS	By matching	By MS/MS	By MS/MS	By MS/MS	10
Q8NC51	Q8NC51	6	6	6	Plasminogen activator inhibitor 1 RNA-binding protein	SERBP1	>Q8NC51 Plasminogen activator inhibitor 1 RNA-binding protein OS=Homo sapiens OX=9606 GN=SERBP1 PE=1 SV=2	1	6	6	6	5	2	0	4	4	2	5	2	0	4	4	2	5	2	0	4	4	2	20.1	20.1	20.1	44.965	408	408	1.76	10	6	5		0	30.904	By MS/MS	By MS/MS	By matching	By MS/MS	By MS/MS	By MS/MS	16.4
Q8NC96	Q8NC96	3	3	3	Adaptin ear-binding coat-associated protein 1	NECAP1	>Q8NC96 Adaptin ear-binding coat-associated protein 1 OS=Homo sapiens OX=9606 GN=NECAP1 PE=1 SV=2	1	3	3	3	2	1	1	2	2	1	2	1	1	2	2	1	2	1	1	2	2	1	18.5	18.5	18.5	29.737	275	275	3		2	5	2	0	10.072	By MS/MS	By matching	By MS/MS	By MS/MS	By MS/MS	By MS/MS	13.1
Q8NCH0	Q8NCH0	2	2	2	Carbohydrate sulfotransferase 14	CHST14	>Q8NCH0 Carbohydrate sulfotransferase 14 OS=Homo sapiens OX=9606 GN=CHST14 PE=1 SV=2	1	2	2	2	0	0	0	1	2	1	0	0	0	1	2	1	0	0	0	1	2	1	5.9	5.9	5.9	42.996	376	376	3.83			1	5	0	3.12	By matching	By matching	By matching	By matching	By MS/MS	By MS/MS	0
Q8NCL4	Q8NCL4	5	5	5	Polypeptide N-acetylgalactosaminyltransferase 6	GALNT6	>Q8NCL4 Polypeptide N-acetylgalactosaminyltransferase 6 OS=Homo sapiens OX=9606 GN=GALNT6 PE=2 SV=2	1	5	5	5	4	3	5	2	0	0	4	3	5	2	0	0	4	3	5	2	0	0	11.4	11.4	11.4	71.158	622	622	2.06	10	2	1	5	0	12.527	By MS/MS	By MS/MS	By MS/MS	By matching	By matching	By matching	9
Q8NCW5	Q8NCW5	4	4	4	NAD(P)H-hydrate epimerase	APOA1BP	>Q8NCW5 NAD(P)H-hydrate epimerase OS=Homo sapiens OX=9606 GN=NAXE PE=1 SV=2	1	4	4	4	4	4	4	4	4	3	4	4	4	4	4	3	4	4	4	4	4	3	16	16	16	31.674	288	288	3.12		6	11	9	0	58.095	By MS/MS	By MS/MS	By MS/MS	By MS/MS	By MS/MS	By MS/MS	16
Q8ND56	Q8ND56	2	2	2	Protein LSM14 homolog A	LSM14A	>Q8ND56 Protein LSM14 homolog A OS=Homo sapiens OX=9606 GN=LSM14A PE=1 SV=3	1	2	2	2	1	1	0	1	1	0	1	1	0	1	1	0	1	1	0	1	1	0	4.8	4.8	4.8	50.529	463	463	2.75		1	3		0.0012232	2.4021	By matching	By MS/MS	By matching	By matching	By MS/MS	By matching	2.2
Q8NE71	Q8NE71	2	2	2	ATP-binding cassette sub-family F member 1	ABCF1	>Q8NE71 ATP-binding cassette sub-family F member 1 OS=Homo sapiens OX=9606 GN=ABCF1 PE=1 SV=2	1	2	2	2	2	0	0	0	2	0	2	0	0	0	2	0	2	0	0	0	2	0	3.3	3.3	3.3	95.925	845	845	1.5	2	2			0	3.198	By MS/MS	By matching	By matching	By matching	By MS/MS	By matching	3.3
Q8NFW8	Q8NFW8	2	2	2	N-acylneuraminate cytidylyltransferase	CMAS	>Q8NFW8 N-acylneuraminate cytidylyltransferase OS=Homo sapiens OX=9606 GN=CMAS PE=1 SV=2	1	2	2	2	2	2	2	2	2	2	2	2	2	2	2	2	2	2	2	2	2	2	6.5	6.5	6.5	48.379	434	434	2.5	6			6	0	7.539	By MS/MS	By MS/MS	By MS/MS	By MS/MS	By MS/MS	By MS/MS	6.5
Q8NHP8	Q8NHP8	3	3	3	Putative phospholipase B-like 2;Putative phospholipase B-like 2 32 kDa form;Putative phospholipase B-like 2 45 kDa form	PLBD2	>Q8NHP8 Putative phospholipase B-like 2 OS=Homo sapiens OX=9606 GN=PLBD2 PE=1 SV=2	1	3	3	3	3	3	2	2	2	1	3	3	2	2	2	1	3	3	2	2	2	1	4.6	4.6	4.6	65.471	589	589	2.91	8			14	0	7.2932	By MS/MS	By MS/MS	By MS/MS	By MS/MS	By MS/MS	By MS/MS	4.6
Q8NI22	Q8NI22	4	4	4	Multiple coagulation factor deficiency protein 2	MCFD2	>Q8NI22 Multiple coagulation factor deficiency protein 2 OS=Homo sapiens OX=9606 GN=MCFD2 PE=1 SV=1	1	4	4	4	0	0	0	3	4	1	0	0	0	3	4	1	0	0	0	3	4	1	52.1	52.1	52.1	16.39	146	146	2.62	3	1		4	0	32.678	By matching	By matching	By matching	By MS/MS	By MS/MS	By matching	0
Q8TAT6	Q8TAT6	3	3	3	Nuclear protein localization protein 4 homolog	NPLOC4	>Q8TAT6 Nuclear protein localization protein 4 homolog OS=Homo sapiens OX=9606 GN=NPLOC4 PE=1 SV=3	1	3	3	3	2	2	1	2	3	2	2	2	1	2	3	2	2	2	1	2	3	2	4.4	4.4	4.4	68.119	608	608	2.75		12	1	7	0	4.0982	By MS/MS	By MS/MS	By matching	By MS/MS	By MS/MS	By MS/MS	2.8
Q8TBC4	Q8TBC4	3	3	3	NEDD8-activating enzyme E1 catalytic subunit	UBA3	>Q8TBC4 NEDD8-activating enzyme E1 catalytic subunit OS=Homo sapiens OX=9606 GN=UBA3 PE=1 SV=2	1	3	3	3	3	1	1	2	1	1	3	1	1	2	1	1	3	1	1	2	1	1	7.3	7.3	7.3	51.852	463	463	1.67	5	3		1	0.0012285	2.4085	By MS/MS	By MS/MS	By matching	By matching	By matching	By matching	7.3
Q8TD57	Q8TD57	2	2	2	Dynein heavy chain 3, axonemal	DNAH3	>Q8TD57 Dynein heavy chain 3, axonemal OS=Homo sapiens OX=9606 GN=DNAH3 PE=2 SV=1	1	2	2	2	2	0	1	1	0	0	2	0	1	1	0	0	2	0	1	1	0	0	0.5	0.5	0.5	470.77	4116	4116	2.75		1	3		0.0012384	2.4863	By MS/MS	By matching	By MS/MS	By matching	By matching	By matching	0.5
Q8TDQ7	Q8TDQ7	4	2	2	Glucosamine-6-phosphate isomerase 2	GNPDA2	>Q8TDQ7 Glucosamine-6-phosphate isomerase 2 OS=Homo sapiens OX=9606 GN=GNPDA2 PE=1 SV=1	1	4	2	2	2	2	2	2	4	3	1	1	1	1	2	1	1	1	1	1	2	1	20.7	9.4	9.4	31.084	276	276	3.56		2		7	0	13.416	By MS/MS	By MS/MS	By MS/MS	By MS/MS	By MS/MS	By MS/MS	9.1
Q9NP97;Q8TF09	Q9NP97;Q8TF09	2;2	2;2	2;2	Dynein light chain roadblock-type 1;Dynein light chain roadblock-type 2	DYNLRB1;DYNLRB2	>Q9NP97 Dynein light chain roadblock-type 1 OS=Homo sapiens OX=9606 GN=DYNLRB1 PE=1 SV=3;>Q8TF09 Dynein light chain roadblock-type 2 OS=Homo sapiens OX=9606 GN=DYNLRB2 PE=1 SV=1	2	2	2	2	2	1	2	1	1	1	2	1	2	1	1	1	2	1	2	1	1	1	9.4	9.4	9.4	10.921	96	96;96	1	8				0.00062578	2.5614	By MS/MS	By MS/MS	By MS/MS	By MS/MS	By MS/MS	By MS/MS	9.4
Q8TF21	Q8TF21	2	2	2	Ankyrin repeat domain-containing protein 24	ANKRD24	>Q8TF21 Ankyrin repeat domain-containing protein 24 OS=Homo sapiens OX=9606 GN=ANKRD24 PE=2 SV=2	1	2	2	2	2	2	1	1	2	2	2	2	1	1	2	2	2	2	1	1	2	2	1.7	1.7	1.7	124.19	1146	1146	3.15		4	3	6	0.0018127	2.3257	By MS/MS	By MS/MS	By MS/MS	By MS/MS	By MS/MS	By MS/MS	1.7
Q8WUM4	Q8WUM4	10	10	10	Programmed cell death 6-interacting protein	PDCD6IP	>Q8WUM4 Programmed cell death 6-interacting protein OS=Homo sapiens OX=9606 GN=PDCD6IP PE=1 SV=1	1	10	10	10	6	7	6	7	9	6	6	7	6	7	9	6	6	7	6	7	9	6	12.2	12.2	12.2	96.022	868	868	2.1	12	13	16		0	27.667	By MS/MS	By MS/MS	By MS/MS	By MS/MS	By MS/MS	By MS/MS	7.4
Q8WVM8	Q8WVM8	4	4	4	Sec1 family domain-containing protein 1	SCFD1	>Q8WVM8 Sec1 family domain-containing protein 1 OS=Homo sapiens OX=9606 GN=SCFD1 PE=1 SV=4	1	4	4	4	4	4	3	3	2	3	4	4	3	3	2	3	4	4	3	3	2	3	9.8	9.8	9.8	72.379	642	642	2.5	6	6		8	0	13.163	By MS/MS	By MS/MS	By MS/MS	By MS/MS	By MS/MS	By MS/MS	9.8
Q8WXD2	Q8WXD2	7	7	7	Secretogranin-3	SCG3	>Q8WXD2 Secretogranin-3 OS=Homo sapiens OX=9606 GN=SCG3 PE=1 SV=3	1	7	7	7	7	5	6	7	7	7	7	5	6	7	7	7	7	5	6	7	7	7	11.1	11.1	11.1	53.005	468	468	1.89	22	8	17		0	13.403	By MS/MS	By MS/MS	By MS/MS	By MS/MS	By MS/MS	By MS/MS	11.1
Q8WXF1	Q8WXF1	2	2	2	Paraspeckle component 1	PSPC1	>Q8WXF1 Paraspeckle component 1 OS=Homo sapiens OX=9606 GN=PSPC1 PE=1 SV=1	1	2	2	2	1	0	0	0	1	0	1	0	0	0	1	0	1	0	0	0	1	0	5.7	5.7	5.7	58.743	523	523	3			2		0	3.2196	By MS/MS	By matching	By matching	By matching	By MS/MS	By matching	2.7
Q8WZA0	Q8WZA0	5	5	5	Protein LZIC	LZIC	>Q8WZA0 Protein LZIC OS=Homo sapiens OX=9606 GN=LZIC PE=1 SV=1	1	5	5	5	3	2	1	4	2	2	3	2	1	4	2	2	3	2	1	4	2	2	29.5	29.5	29.5	21.494	190	190	2.5	3	6		5	0	24.987	By MS/MS	By MS/MS	By MS/MS	By MS/MS	By MS/MS	By MS/MS	22.1
Q8WZA9	Q8WZA9	2	2	2	Immunity-related GTPase family Q protein	IRGQ	>Q8WZA9 Immunity-related GTPase family Q protein OS=Homo sapiens OX=9606 GN=IRGQ PE=1 SV=1	1	2	2	2	1	2	0	2	1	1	1	2	0	2	1	1	1	2	0	2	1	1	5.9	5.9	5.9	62.717	623	623	3.29			5	2	0	7.9161	By MS/MS	By MS/MS	By matching	By MS/MS	By MS/MS	By MS/MS	3.4
Q92484	Q92484	2	2	2	Acid sphingomyelinase-like phosphodiesterase 3a	SMPDL3A	>Q92484 Acid sphingomyelinase-like phosphodiesterase 3a OS=Homo sapiens OX=9606 GN=SMPDL3A PE=1 SV=2	1	2	2	2	1	0	2	0	0	0	1	0	2	0	0	0	1	0	2	0	0	0	7.1	7.1	7.1	51.26	453	453	4				3	0	3.2552	By matching	By matching	By MS/MS	By matching	By matching	By matching	3.3
Q92499	Q92499	6	6	6	ATP-dependent RNA helicase DDX1	DDX1	>Q92499 ATP-dependent RNA helicase DDX1 OS=Homo sapiens OX=9606 GN=DDX1 PE=1 SV=2	1	6	6	6	5	4	2	5	5	3	5	4	2	5	5	3	5	4	2	5	5	3	10.8	10.8	10.8	82.431	740	740	2.48		16	6	3	0	18.192	By MS/MS	By MS/MS	By MS/MS	By MS/MS	By MS/MS	By matching	8.2
Q92520	Q92520	6	6	6	Protein FAM3C	FAM3C	>Q92520 Protein FAM3C OS=Homo sapiens OX=9606 GN=FAM3C PE=1 SV=1	1	6	6	6	6	4	6	2	5	3	6	4	6	2	5	3	6	4	6	2	5	3	30.8	30.8	30.8	24.68	227	227	2.7	4	1	25		0	39.156	By MS/MS	By MS/MS	By MS/MS	By MS/MS	By MS/MS	By MS/MS	30.8
Q92563	Q92563	3	3	3	Testican-2	SPOCK2	>Q92563 Testican-2 OS=Homo sapiens OX=9606 GN=SPOCK2 PE=1 SV=1	1	3	3	3	2	3	2	3	2	3	2	3	2	3	2	3	2	3	2	3	2	3	7.1	7.1	7.1	46.779	424	424	3.12	3		6	8	0	6.3738	By MS/MS	By MS/MS	By MS/MS	By MS/MS	By MS/MS	By MS/MS	4.7
Q92598	Q92598	4	4	4	Heat shock protein 105 kDa	HSPH1	>Q92598 Heat shock protein 105 kDa OS=Homo sapiens OX=9606 GN=HSPH1 PE=1 SV=1	1	4	4	4	4	4	1	4	4	3	4	4	1	4	4	3	4	4	1	4	4	3	6.2	6.2	6.2	96.864	858	858	1.55	9	11			0	11.943	By MS/MS	By MS/MS	By matching	By MS/MS	By MS/MS	By MS/MS	6.2
Q92599	Q92599	6	3	3	Septin-8	45543	>Q92599 Septin-8 OS=Homo sapiens OX=9606 GN=SEPT8 PE=1 SV=4	1	6	3	3	2	3	1	4	4	1	2	2	1	3	2	0	2	2	1	3	2	0	16.6	9.5	9.5	55.756	483	483	3.7	1			9	0	18.14	By matching	By matching	By matching	By MS/MS	By matching	By matching	7.2
Q92626	Q92626	52	52	52	Peroxidasin homolog	PXDN	>Q92626 Peroxidasin homolog OS=Homo sapiens OX=9606 GN=PXDN PE=1 SV=2	1	52	52	52	28	19	33	43	51	42	28	19	33	43	51	42	28	19	33	43	51	42	44.8	44.8	44.8	165.27	1479	1479	2.75	64	75	84	118	0	323.31	By MS/MS	By MS/MS	By MS/MS	By MS/MS	By MS/MS	By MS/MS	23.1
Q92688	Q92688	4	2	2	Acidic leucine-rich nuclear phosphoprotein 32 family member B	ANP32B	>Q92688 Acidic leucine-rich nuclear phosphoprotein 32 family member B OS=Homo sapiens OX=9606 GN=ANP32B PE=1 SV=1	1	4	2	2	3	3	3	3	4	4	1	1	1	1	2	2	1	1	1	1	2	2	21.1	9.6	9.6	28.787	251	251	4				13	0	4.9106	By MS/MS	By matching	By matching	By MS/MS	By MS/MS	By matching	16.7
Q92734	Q92734	5	5	5	Protein TFG	TFG	>Q92734 Protein TFG OS=Homo sapiens OX=9606 GN=TFG PE=1 SV=2	1	5	5	5	4	5	2	4	4	4	4	5	2	4	4	4	4	5	2	4	4	4	13.8	13.8	13.8	43.447	400	400	2.28	7	11		7	0	17.718	By MS/MS	By MS/MS	By MS/MS	By MS/MS	By MS/MS	By MS/MS	9
Q92743	Q92743	11	11	11	Serine protease HTRA1	HTRA1	>Q92743 Serine protease HTRA1 OS=Homo sapiens OX=9606 GN=HTRA1 PE=1 SV=1	1	11	11	11	1	0	2	11	11	9	1	0	2	11	11	9	1	0	2	11	11	9	30.8	30.8	30.8	51.286	480	480	2.32	16	12	7	12	0	73.421	By MS/MS	By matching	By matching	By MS/MS	By MS/MS	By MS/MS	1.7
Q92747	Q92747	4	4	4	Actin-related protein 2/3 complex subunit 1A	ARPC1A	>Q92747 Actin-related protein 2/3 complex subunit 1A OS=Homo sapiens OX=9606 GN=ARPC1A PE=2 SV=2	1	4	4	4	2	3	0	3	3	0	2	3	0	3	3	0	2	3	0	3	3	0	11.6	11.6	11.6	41.569	370	370	2	3	6	3		0	9.5778	By MS/MS	By MS/MS	By matching	By matching	By MS/MS	By matching	4.3
Q92783;O75886	Q92783	3;1	3;1	3;1	Signal transducing adapter molecule 1	STAM	>Q92783 Signal transducing adapter molecule 1 OS=Homo sapiens OX=9606 GN=STAM PE=1 SV=3	2	3	3	3	2	3	0	1	2	1	2	3	0	1	2	1	2	3	0	1	2	1	7	7	7	59.179	540	540;525	2.89		1	8		0	10	By MS/MS	By MS/MS	By matching	By matching	By MS/MS	By MS/MS	5.2
Q92820	Q92820	4	4	4	Gamma-glutamyl hydrolase	GGH	>Q92820 Gamma-glutamyl hydrolase OS=Homo sapiens OX=9606 GN=GGH PE=1 SV=2	1	4	4	4	2	1	2	3	4	2	2	1	2	3	4	2	2	1	2	3	4	2	15.1	15.1	15.1	35.964	318	318	2.53	5	1	8	3	0	6.5161	By matching	By MS/MS	By MS/MS	By MS/MS	By MS/MS	By matching	7.9
Q92841;P17844	Q92841	10;4	10;4	9;3	Probable ATP-dependent RNA helicase DDX17	DDX17	>Q92841 Probable ATP-dependent RNA helicase DDX17 OS=Homo sapiens OX=9606 GN=DDX17 PE=1 SV=2	2	10	10	9	8	5	2	5	10	5	8	5	2	5	10	5	7	5	2	5	9	4	15.4	15.4	13.9	80.272	729	729;614	2.97		10	17	9	0	21.296	By MS/MS	By MS/MS	By matching	By MS/MS	By MS/MS	By MS/MS	12.3
Q92882	Q92882	2	2	2	Osteoclast-stimulating factor 1	OSTF1	>Q92882 Osteoclast-stimulating factor 1 OS=Homo sapiens OX=9606 GN=OSTF1 PE=1 SV=2	1	2	2	2	2	1	2	2	1	2	2	1	2	2	1	2	2	1	2	2	1	2	20.6	20.6	20.6	23.787	214	214	3.5			5	5	0	18.733	By MS/MS	By MS/MS	By matching	By MS/MS	By matching	By MS/MS	20.6
Q92890	Q92890	3	3	3	Ubiquitin fusion degradation protein 1 homolog	UFD1L	>Q92890 Ubiquitin recognition factor in ER-associated degradation protein 1 OS=Homo sapiens OX=9606 GN=UFD1 PE=1 SV=3	1	3	3	3	1	1	1	2	2	1	1	1	1	2	2	1	1	1	1	2	2	1	13.4	13.4	13.4	34.5	307	307	4				9	0	6.0982	By MS/MS	By MS/MS	By matching	By MS/MS	By MS/MS	By MS/MS	4.2
Q92896	Q92896	5	5	5	Golgi apparatus protein 1	GLG1	>Q92896 Golgi apparatus protein 1 OS=Homo sapiens OX=9606 GN=GLG1 PE=1 SV=2	1	5	5	5	0	2	1	2	2	1	0	2	1	2	2	1	0	2	1	2	2	1	5.8	5.8	5.8	134.55	1179	1179	1.89	4	3	1	1	0	7.546	By matching	By MS/MS	By matching	By MS/MS	By MS/MS	By MS/MS	0
Q92905	Q92905	4	4	4	COP9 signalosome complex subunit 5	COPS5	>Q92905 COP9 signalosome complex subunit 5 OS=Homo sapiens OX=9606 GN=COPS5 PE=1 SV=4	1	4	4	4	3	3	2	4	3	2	3	3	2	4	3	2	3	3	2	4	3	2	12	12	12	37.578	334	334	2	12	2		6	0	5.672	By MS/MS	By MS/MS	By matching	By MS/MS	By MS/MS	By MS/MS	9
Q92945;Q96I24	Q92945	9;1	7;0	7;0	Far upstream element-binding protein 2	KHSRP	>Q92945 Far upstream element-binding protein 2 OS=Homo sapiens OX=9606 GN=KHSRP PE=1 SV=4	2	9	7	7	6	5	3	8	9	4	4	3	2	6	7	3	4	3	2	6	7	3	13.6	10.5	10.5	73.114	711	711;572	2	7	14	1	3	0	10.389	By MS/MS	By MS/MS	By MS/MS	By MS/MS	By MS/MS	By MS/MS	9.8
Q92973	Q92973	2	2	2	Transportin-1	TNPO1	>Q92973 Transportin-1 OS=Homo sapiens OX=9606 GN=TNPO1 PE=1 SV=2	1	2	2	2	0	1	1	2	1	1	0	1	1	2	1	1	0	1	1	2	1	1	2.4	2.4	2.4	102.35	898	898	3.17			5	1	0.00063371	2.7313	By matching	By matching	By matching	By MS/MS	By MS/MS	By matching	0
Q93009	Q93009	2	2	2	Ubiquitin carboxyl-terminal hydrolase 7	USP7	>Q93009 Ubiquitin carboxyl-terminal hydrolase 7 OS=Homo sapiens OX=9606 GN=USP7 PE=1 SV=2	1	2	2	2	1	1	0	2	2	1	1	1	0	2	2	1	1	1	0	2	2	1	1.8	1.8	1.8	128.3	1102	1102	1.29	5	2			0.0018105	2.3154	By matching	By matching	By matching	By MS/MS	By MS/MS	By matching	0.9
Q93052	Q93052	2	2	2	Lipoma-preferred partner	LPP	>Q93052 Lipoma-preferred partner OS=Homo sapiens OX=9606 GN=LPP PE=1 SV=1	1	2	2	2	2	0	0	1	2	0	2	0	0	1	2	0	2	0	0	1	2	0	4.4	4.4	4.4	65.746	612	612	2.5	3			3	0	5.2894	By MS/MS	By matching	By matching	By MS/MS	By MS/MS	By matching	4.4
Q93063	Q93063	3	3	3	Exostosin-2	EXT2	>Q93063 Exostosin-2 OS=Homo sapiens OX=9606 GN=EXT2 PE=1 SV=1	1	3	3	3	0	1	0	2	3	3	0	1	0	2	3	3	0	1	0	2	3	3	4	4	4	82.254	718	718	1.89	5		4		0	4.0735	By matching	By matching	By matching	By matching	By MS/MS	By MS/MS	0
Q969H8	Q969H8	3	3	3	UPF0556 protein C19orf10	C19orf10	>Q969H8 Myeloid-derived growth factor OS=Homo sapiens OX=9606 GN=MYDGF PE=1 SV=1	1	3	3	3	1	2	1	3	3	3	1	2	1	3	3	3	1	2	1	3	3	3	24.9	24.9	24.9	18.795	173	173	2.83	2	1	19	1	0	41.03	By matching	By matching	By matching	By MS/MS	By MS/MS	By MS/MS	6.4
Q96AC1	Q96AC1	8	8	8	Fermitin family homolog 2	FERMT2	>Q96AC1 Fermitin family homolog 2 OS=Homo sapiens OX=9606 GN=FERMT2 PE=1 SV=1	1	8	8	8	5	6	4	7	6	5	5	6	4	7	6	5	5	6	4	7	6	5	15.3	15.3	15.3	77.86	680	680	2.82	6	10	1	16	0	24.042	By MS/MS	By MS/MS	By MS/MS	By MS/MS	By MS/MS	By MS/MS	10.1
Q96AE4	Q96AE4	10	10	8	Far upstream element-binding protein 1	FUBP1	>Q96AE4 Far upstream element-binding protein 1 OS=Homo sapiens OX=9606 GN=FUBP1 PE=1 SV=3	1	10	10	8	9	9	3	6	8	5	9	9	3	6	8	5	7	7	2	4	6	4	17.5	17.5	15.2	67.56	644	644	2.4	6	14	21	1	0	56.847	By MS/MS	By MS/MS	By MS/MS	By MS/MS	By MS/MS	By MS/MS	16
Q96AY3	Q96AY3	10	10	10	Peptidyl-prolyl cis-trans isomerase FKBP10	FKBP10	>Q96AY3 Peptidyl-prolyl cis-trans isomerase FKBP10 OS=Homo sapiens OX=9606 GN=FKBP10 PE=1 SV=1	1	10	10	10	1	5	1	9	10	9	1	5	1	9	10	9	1	5	1	9	10	9	18.6	18.6	18.6	64.244	582	582	1.89	9	24	5		0	36.017	By matching	By MS/MS	By MS/MS	By MS/MS	By MS/MS	By MS/MS	2.1
Q96C19	Q96C19	4	4	3	EF-hand domain-containing protein D2	EFHD2	>Q96C19 EF-hand domain-containing protein D2 OS=Homo sapiens OX=9606 GN=EFHD2 PE=1 SV=1	1	4	4	3	4	3	2	3	4	2	4	3	2	3	4	2	3	2	1	2	3	1	19.2	19.2	15	26.697	240	240	2.68	1	5	12	1	0	15.896	By MS/MS	By MS/MS	By MS/MS	By MS/MS	By MS/MS	By MS/MS	19.2
Q96C86	Q96C86	3	3	3	m7GpppX diphosphatase	DCPS	>Q96C86 m7GpppX diphosphatase OS=Homo sapiens OX=9606 GN=DCPS PE=1 SV=2	1	3	3	3	0	2	2	1	2	2	0	2	2	1	2	2	0	2	2	1	2	2	14.2	14.2	14.2	38.608	337	337	1.9	5	3		2	0	6.9245	By matching	By MS/MS	By matching	By MS/MS	By MS/MS	By MS/MS	0
Q96CG8	Q96CG8	7	7	7	Collagen triple helix repeat-containing protein 1	CTHRC1	>Q96CG8 Collagen triple helix repeat-containing protein 1 OS=Homo sapiens OX=9606 GN=CTHRC1 PE=1 SV=1	1	7	7	7	4	3	2	7	7	5	4	3	2	7	7	5	4	3	2	7	7	5	34.2	34.2	34.2	26.224	243	243	2.9		14	5	11	0	67.085	By MS/MS	By matching	By matching	By MS/MS	By MS/MS	By MS/MS	16.5
Q96CN7	Q96CN7	4	4	4	Isochorismatase domain-containing protein 1	ISOC1	>Q96CN7 Isochorismatase domain-containing protein 1 OS=Homo sapiens OX=9606 GN=ISOC1 PE=1 SV=3	1	4	4	4	4	2	2	4	2	3	4	2	2	4	2	3	4	2	2	4	2	3	17.8	17.8	17.8	32.236	298	298	2.76	6		3	8	0	12.173	By MS/MS	By MS/MS	By MS/MS	By MS/MS	By MS/MS	By MS/MS	17.8
Q96CX2	Q96CX2	4	4	3	BTB/POZ domain-containing protein KCTD12	KCTD12	>Q96CX2 BTB/POZ domain-containing protein KCTD12 OS=Homo sapiens OX=9606 GN=KCTD12 PE=1 SV=1	1	4	4	3	3	2	3	3	3	2	3	2	3	3	3	2	2	2	3	3	3	2	13.2	13.2	9.8	35.7	325	325	2.88	4		7	6	0	9.6494	By MS/MS	By MS/MS	By MS/MS	By MS/MS	By MS/MS	By MS/MS	11.1
Q96D15	Q96D15	9	9	9	Reticulocalbin-3	RCN3	>Q96D15 Reticulocalbin-3 OS=Homo sapiens OX=9606 GN=RCN3 PE=1 SV=1	1	9	9	9	6	2	5	8	9	5	6	2	5	8	9	5	6	2	5	8	9	5	38.7	38.7	38.7	37.493	328	328	2.19	13	9	19	1	0	64.39	By MS/MS	By matching	By MS/MS	By MS/MS	By MS/MS	By MS/MS	22.9
Q96DG6	Q96DG6	2	2	2	Carboxymethylenebutenolidase homolog	CMBL	>Q96DG6 Carboxymethylenebutenolidase homolog OS=Homo sapiens OX=9606 GN=CMBL PE=1 SV=1	1	2	2	2	1	2	1	1	1	1	1	2	1	1	1	1	1	2	1	1	1	1	10.6	10.6	10.6	28.048	245	245	3		1	8	1	0	10.691	By MS/MS	By MS/MS	By MS/MS	By MS/MS	By MS/MS	By MS/MS	4.9
Q96EK6	Q96EK6	3	3	3	Glucosamine 6-phosphate N-acetyltransferase	GNPNAT1	>Q96EK6 Glucosamine 6-phosphate N-acetyltransferase OS=Homo sapiens OX=9606 GN=GNPNAT1 PE=1 SV=1	1	3	3	3	0	1	1	2	2	1	0	1	1	2	2	1	0	1	1	2	2	1	18.5	18.5	18.5	20.749	184	184	2	4		2	1	0	4.6308	By matching	By MS/MS	By MS/MS	By MS/MS	By MS/MS	By MS/MS	0
Q96EP5	Q96EP5	2	2	2	DAZ-associated protein 1	DAZAP1	>Q96EP5 DAZ-associated protein 1 OS=Homo sapiens OX=9606 GN=DAZAP1 PE=1 SV=1	1	2	2	2	0	1	0	1	2	0	0	1	0	1	2	0	0	1	0	1	2	0	7.6	7.6	7.6	43.383	407	407	4				4	0	4.4079	By matching	By matching	By matching	By MS/MS	By MS/MS	By matching	0
Q96FJ2;P63167	Q96FJ2;P63167	2;1	2;1	2;1	Dynein light chain 2, cytoplasmic;Dynein light chain 1, cytoplasmic	DYNLL2;DYNLL1	>Q96FJ2 Dynein light chain 2, cytoplasmic OS=Homo sapiens OX=9606 GN=DYNLL2 PE=1 SV=1;>P63167 Dynein light chain 1, cytoplasmic OS=Homo sapiens OX=9606 GN=DYNLL1 PE=1 SV=1	2	2	2	2	2	2	1	2	2	2	2	2	1	2	2	2	2	2	1	2	2	2	37.1	37.1	37.1	10.35	89	89;89	2		23			0	74.925	By MS/MS	By MS/MS	By MS/MS	By MS/MS	By MS/MS	By MS/MS	37.1
Q96FQ6	Q96FQ6	2	2	2	Protein S100-A16	S100A16	>Q96FQ6 Protein S100-A16 OS=Homo sapiens OX=9606 GN=S100A16 PE=1 SV=1	1	2	2	2	2	2	2	1	1	1	2	2	2	1	1	1	2	2	2	1	1	1	23.3	23.3	23.3	11.801	103	103	2.73		3	8		0	4.2521	By MS/MS	By MS/MS	By MS/MS	By MS/MS	By MS/MS	By MS/MS	23.3
Q96FV2	Q96FV2	3	3	3	Secernin-2	SCRN2	>Q96FV2 Secernin-2 OS=Homo sapiens OX=9606 GN=SCRN2 PE=1 SV=3	1	3	3	3	3	2	2	2	3	3	3	2	2	2	3	3	3	2	2	2	3	3	8.2	8.2	8.2	46.596	425	425	2.88		3	12	1	0	3.5841	By MS/MS	By MS/MS	By MS/MS	By MS/MS	By MS/MS	By MS/MS	8.2
Q96FW1	Q96FW1	4	4	4	Ubiquitin thioesterase OTUB1	OTUB1	>Q96FW1 Ubiquitin thioesterase OTUB1 OS=Homo sapiens OX=9606 GN=OTUB1 PE=1 SV=2	1	4	4	4	4	3	3	3	3	3	4	3	3	3	3	3	4	3	3	3	3	3	19.2	19.2	19.2	31.284	271	271	3.89	1			27	0	11.809	By MS/MS	By MS/MS	By MS/MS	By MS/MS	By MS/MS	By MS/MS	19.2
Q96G03	Q96G03	8	8	8	Phosphoglucomutase-2	PGM2	>Q96G03 Phosphoglucomutase-2 OS=Homo sapiens OX=9606 GN=PGM2 PE=1 SV=4	1	8	8	8	6	7	4	6	6	7	6	7	4	6	6	7	6	7	4	6	6	7	15.8	15.8	15.8	68.283	612	612	2.51	11	7	23	6	0	30.025	By MS/MS	By MS/MS	By MS/MS	By MS/MS	By MS/MS	By MS/MS	12.6
Q96GD0	Q96GD0	3	3	2	Pyridoxal phosphate phosphatase	PDXP	>Q96GD0 Pyridoxal phosphate phosphatase OS=Homo sapiens OX=9606 GN=PDXP PE=1 SV=2	1	3	3	2	2	1	1	1	2	0	2	1	1	1	2	0	2	1	1	1	1	0	13.9	13.9	10.5	31.698	296	296	3.8			2	8	0	7.1222	By MS/MS	By MS/MS	By matching	By MS/MS	By MS/MS	By matching	10.5
Q96GG9	Q96GG9	2	2	2	DCN1-like protein 1	DCUN1D1	>Q96GG9 DCN1-like protein 1 OS=Homo sapiens OX=9606 GN=DCUN1D1 PE=1 SV=1	1	2	2	2	2	2	0	2	2	1	2	2	0	2	2	1	2	2	0	2	2	1	13.1	13.1	13.1	30.124	259	259	2.89		5		4	0	12.174	By MS/MS	By MS/MS	By matching	By MS/MS	By MS/MS	By MS/MS	13.1
Q96HC4	Q96HC4	3	3	3	PDZ and LIM domain protein 5	PDLIM5	>Q96HC4 PDZ and LIM domain protein 5 OS=Homo sapiens OX=9606 GN=PDLIM5 PE=1 SV=5	1	3	3	3	3	2	2	2	3	1	3	2	2	2	3	1	3	2	2	2	3	1	5.9	5.9	5.9	63.944	596	596	3.54		3		10	0	5.8955	By MS/MS	By matching	By MS/MS	By matching	By matching	By matching	5.9
Q96HE7	Q96HE7	6	6	5	ERO1-like protein alpha	ERO1L	>Q96HE7 ERO1-like protein alpha OS=Homo sapiens OX=9606 GN=ERO1A PE=1 SV=2	1	6	6	5	3	4	2	5	6	5	3	4	2	5	6	5	2	3	1	4	5	4	17.7	17.7	15.4	54.392	468	468	2.29	13		9	6	0	11.055	By MS/MS	By MS/MS	By MS/MS	By MS/MS	By MS/MS	By MS/MS	9
Q96HF1	Q96HF1	5	5	5	Secreted frizzled-related protein 2	SFRP2	>Q96HF1 Secreted frizzled-related protein 2 OS=Homo sapiens OX=9606 GN=SFRP2 PE=1 SV=2	1	5	5	5	1	1	0	0	0	5	1	1	0	0	0	5	1	1	0	0	0	5	14.9	14.9	14.9	33.49	295	295	2.29	2	3		2	0	78.293	By matching	By matching	By matching	By matching	By matching	By MS/MS	2.4
Q96I99	Q96I99	3	3	3	Succinyl-CoA ligase [GDP-forming] subunit beta, mitochondrial	SUCLG2	>Q96I99 Succinate--CoA ligase [GDP-forming] subunit beta, mitochondrial OS=Homo sapiens OX=9606 GN=SUCLG2 PE=1 SV=2	1	3	3	3	2	2	2	2	3	2	2	2	2	2	3	2	2	2	2	2	3	2	11.6	11.6	11.6	46.51	432	432	2.47		8	7		0	13.753	By MS/MS	By MS/MS	By matching	By MS/MS	By MS/MS	By MS/MS	4.6
Q96IJ6	Q96IJ6	3	3	3	Mannose-1-phosphate guanyltransferase alpha	GMPPA	>Q96IJ6 Mannose-1-phosphate guanyltransferase alpha OS=Homo sapiens OX=9606 GN=GMPPA PE=1 SV=1	1	3	3	3	1	2	0	2	1	0	1	2	0	2	1	0	1	2	0	2	1	0	8.8	8.8	8.8	46.291	420	420	3.14		3		4	0	4.3428	By MS/MS	By MS/MS	By matching	By MS/MS	By MS/MS	By matching	2.4
Q96IU4	Q96IU4	3	3	3	Alpha/beta hydrolase domain-containing protein 14B	ABHD14B	>Q96IU4 Protein ABHD14B OS=Homo sapiens OX=9606 GN=ABHD14B PE=1 SV=1	1	3	3	3	2	1	2	2	2	1	2	1	2	2	2	1	2	1	2	2	2	1	20.5	20.5	20.5	22.345	210	210	3.25		3	3	6	0	21.349	By MS/MS	By MS/MS	By MS/MS	By MS/MS	By MS/MS	By matching	10
Q96JB1	Q96JB1	2	2	2	Dynein heavy chain 8, axonemal	DNAH8	>Q96JB1 Dynein heavy chain 8, axonemal OS=Homo sapiens OX=9606 GN=DNAH8 PE=1 SV=2	1	2	2	2	1	2	1	1	1	0	1	2	1	1	1	0	1	2	1	1	1	0	0.3	0.3	0.3	514.66	4490	4490	1.22	8		1		0.0023175	2.0742	By MS/MS	By MS/MS	By MS/MS	By MS/MS	By MS/MS	By matching	0.2
Q96K17	Q96K17	2	2	2	Transcription factor BTF3 homolog 4	BTF3L4	>Q96K17 Transcription factor BTF3 homolog 4 OS=Homo sapiens OX=9606 GN=BTF3L4 PE=1 SV=1	1	2	2	2	2	1	1	1	2	1	2	1	1	1	2	1	2	1	1	1	2	1	17.7	17.7	17.7	17.27	158	158	2.4		8		2	0	4.4496	By MS/MS	By MS/MS	By matching	By matching	By MS/MS	By MS/MS	17.7
Q96K76	Q96K76	3	3	3	Ubiquitin carboxyl-terminal hydrolase 47	USP47	>Q96K76 Ubiquitin carboxyl-terminal hydrolase 47 OS=Homo sapiens OX=9606 GN=USP47 PE=1 SV=3	1	3	3	3	1	3	2	2	3	3	1	3	2	2	3	3	1	3	2	2	3	3	2.3	2.3	2.3	157.31	1375	1375	2.56	5	3	2	6	0	4.2009	By MS/MS	By MS/MS	By MS/MS	By MS/MS	By MS/MS	By MS/MS	0.9
Q96KP4	Q96KP4	6	6	6	Cytosolic non-specific dipeptidase	CNDP2	>Q96KP4 Cytosolic non-specific dipeptidase OS=Homo sapiens OX=9606 GN=CNDP2 PE=1 SV=2	1	6	6	6	4	5	2	4	3	3	4	5	2	4	3	3	4	5	2	4	3	3	18.9	18.9	18.9	52.878	475	475	3.38			13	8	0	20.276	By MS/MS	By MS/MS	By MS/MS	By MS/MS	By MS/MS	By MS/MS	11.6
Q96M27	Q96M27	2	2	2	Protein PRRC1	PRRC1	>Q96M27 Protein PRRC1 OS=Homo sapiens OX=9606 GN=PRRC1 PE=1 SV=1	1	2	2	2	1	1	0	1	0	1	1	1	0	1	0	1	1	1	0	1	0	1	6.7	6.7	6.7	46.701	445	445	3.5		1		3	0	7.775	By MS/MS	By MS/MS	By matching	By MS/MS	By matching	By MS/MS	3.8
Q96QK1	Q96QK1	7	7	7	Vacuolar protein sorting-associated protein 35	VPS35	>Q96QK1 Vacuolar protein sorting-associated protein 35 OS=Homo sapiens OX=9606 GN=VPS35 PE=1 SV=2	1	7	7	7	5	4	5	6	6	4	5	4	5	6	6	4	5	4	5	6	6	4	10.4	10.4	10.4	91.706	796	796	2.81	3	13	9	12	0	17.546	By MS/MS	By MS/MS	By MS/MS	By MS/MS	By MS/MS	By MS/MS	7.9
Q96TA1	Q96TA1	2	2	2	Niban-like protein 1	FAM129B	>Q96TA1 Niban-like protein 1 OS=Homo sapiens OX=9606 GN=FAM129B PE=1 SV=3	1	2	2	2	2	1	0	0	1	1	2	1	0	0	1	1	2	1	0	0	1	1	3.8	3.8	3.8	84.137	746	746	2		5			0	6.9469	By MS/MS	By matching	By matching	By matching	By MS/MS	By matching	3.8
Q99436	Q99436	4	4	4	Proteasome subunit beta type-7	PSMB7	>Q99436 Proteasome subunit beta type-7 OS=Homo sapiens OX=9606 GN=PSMB7 PE=1 SV=1	1	4	4	4	3	4	3	4	3	4	3	4	3	4	3	4	3	4	3	4	3	4	14.4	14.4	14.4	29.965	277	277	1	23				0	97.66	By MS/MS	By MS/MS	By MS/MS	By MS/MS	By MS/MS	By MS/MS	11.2
Q99439	Q99439	3	2	2	Calponin-2	CNN2	>Q99439 Calponin-2 OS=Homo sapiens OX=9606 GN=CNN2 PE=1 SV=4	1	3	2	2	1	0	0	3	1	1	0	0	0	2	1	1	0	0	0	2	1	1	10.7	7.1	7.1	33.697	309	309	3.75			1	3	0	3.4003	By matching	By matching	By matching	By MS/MS	By MS/MS	By MS/MS	3.6
Q99460	Q99460	7	7	7	26S proteasome non-ATPase regulatory subunit 1	PSMD1	>Q99460 26S proteasome non-ATPase regulatory subunit 1 OS=Homo sapiens OX=9606 GN=PSMD1 PE=1 SV=2	1	7	7	7	5	5	2	5	4	2	5	5	2	5	4	2	5	5	2	5	4	2	11.2	11.2	11.2	105.84	953	953	2.25	4	16	5	3	0	33.928	By MS/MS	By MS/MS	By MS/MS	By MS/MS	By MS/MS	By MS/MS	8
Q99471	Q99471	3	3	3	Prefoldin subunit 5	PFDN5	>Q99471 Prefoldin subunit 5 OS=Homo sapiens OX=9606 GN=PFDN5 PE=1 SV=2	1	3	3	3	1	2	1	2	3	2	1	2	1	2	3	2	1	2	1	2	3	2	26.6	26.6	26.6	17.328	154	154	3.87		1		14	0	13.722	By MS/MS	By MS/MS	By matching	By MS/MS	By MS/MS	By matching	11.7
Q99497	Q99497	8	8	8	Protein DJ-1	PARK7	>Q99497 Protein/nucleic acid deglycase DJ-1 OS=Homo sapiens OX=9606 GN=PARK7 PE=1 SV=2	1	8	8	8	7	7	7	7	8	8	7	7	7	7	8	8	7	7	7	7	8	8	46.6	46.6	46.6	19.891	189	189	2.31	8	62	29	6	0	84.571	By MS/MS	By MS/MS	By MS/MS	By MS/MS	By MS/MS	By MS/MS	42.9
Q99536	Q99536	9	9	9	Synaptic vesicle membrane protein VAT-1 homolog	VAT1	>Q99536 Synaptic vesicle membrane protein VAT-1 homolog OS=Homo sapiens OX=9606 GN=VAT1 PE=1 SV=2	1	9	9	9	6	8	5	7	7	5	6	8	5	7	7	5	6	8	5	7	7	5	33.6	33.6	33.6	41.92	393	393	2.72	15	9	15	22	0	85.517	By MS/MS	By MS/MS	By MS/MS	By MS/MS	By MS/MS	By MS/MS	20.9
Q99538	Q99538	2	2	2	Legumain	LGMN	>Q99538 Legumain OS=Homo sapiens OX=9606 GN=LGMN PE=1 SV=1	1	2	2	2	0	0	0	2	1	0	0	0	0	2	1	0	0	0	0	2	1	0	6.5	6.5	6.5	49.411	433	433	2	2			1	0	6.482	By matching	By matching	By matching	By MS/MS	By matching	By matching	0
Q99574	Q99574	6	6	6	Neuroserpin	SERPINI1	>Q99574 Neuroserpin OS=Homo sapiens OX=9606 GN=SERPINI1 PE=1 SV=1	1	6	6	6	6	6	5	6	6	5	6	6	5	6	6	5	6	6	5	6	6	5	13.9	13.9	13.9	46.426	410	410	2.61		27	17	7	0	13.568	By MS/MS	By MS/MS	By MS/MS	By MS/MS	By MS/MS	By MS/MS	13.9
Q99714	Q99714	2	2	2	3-hydroxyacyl-CoA dehydrogenase type-2	HSD17B10	>Q99714 3-hydroxyacyl-CoA dehydrogenase type-2 OS=Homo sapiens OX=9606 GN=HSD17B10 PE=1 SV=3	1	2	2	2	1	2	1	2	2	1	1	2	1	2	2	1	1	2	1	2	2	1	10.7	10.7	10.7	26.923	261	261	1.33	6	3			0	30.533	By MS/MS	By MS/MS	By MS/MS	By MS/MS	By MS/MS	By MS/MS	6.5
Q99715	Q99715	92	92	91	Collagen alpha-1(XII) chain	COL12A1	>Q99715 Collagen alpha-1(XII) chain OS=Homo sapiens OX=9606 GN=COL12A1 PE=1 SV=2	1	92	92	91	54	37	56	81	86	81	54	37	56	81	86	81	53	36	55	80	85	80	37.2	37.2	37.2	333.14	3063	3063	2.85	67	102	184	159	0	323.31	By MS/MS	By MS/MS	By MS/MS	By MS/MS	By MS/MS	By MS/MS	20.8
Q99729	Q99729	2	2	2	Heterogeneous nuclear ribonucleoprotein A/B	HNRNPAB	>Q99729 Heterogeneous nuclear ribonucleoprotein A/B OS=Homo sapiens OX=9606 GN=HNRNPAB PE=1 SV=2	1	2	2	2	0	1	1	1	2	1	0	1	1	1	2	1	0	1	1	1	2	1	7.5	7.5	7.5	36.224	332	332	3.5	1			5	0	10.809	By matching	By MS/MS	By MS/MS	By matching	By MS/MS	By matching	0
Q99733	Q99733	4	3	3	Nucleosome assembly protein 1-like 4	NAP1L4	>Q99733 Nucleosome assembly protein 1-like 4 OS=Homo sapiens OX=9606 GN=NAP1L4 PE=1 SV=1	1	4	3	3	4	1	1	2	2	1	3	0	0	1	1	0	3	0	0	1	1	0	13.1	10.4	10.4	42.823	375	375	3	1		2	2	0	5.7483	By MS/MS	By matching	By matching	By MS/MS	By MS/MS	By matching	13.1
Q99757	Q99757	4	4	4	Thioredoxin, mitochondrial	TXN2	>Q99757 Thioredoxin, mitochondrial OS=Homo sapiens OX=9606 GN=TXN2 PE=1 SV=2	1	4	4	4	4	4	2	4	4	3	4	4	2	4	4	3	4	4	2	4	4	3	36.7	36.7	36.7	18.383	166	166	2.82	2	5	10	5	0	64.351	By MS/MS	By MS/MS	By MS/MS	By MS/MS	By MS/MS	By MS/MS	36.7
Q99798	Q99798	16	16	16	Aconitate hydratase, mitochondrial	ACO2	>Q99798 Aconitate hydratase, mitochondrial OS=Homo sapiens OX=9606 GN=ACO2 PE=1 SV=2	1	16	16	16	10	12	9	13	13	12	10	12	9	13	13	12	10	12	9	13	13	12	25.6	25.6	25.6	85.424	780	780	3	1	22	36	24	0	109.32	By MS/MS	By MS/MS	By MS/MS	By MS/MS	By MS/MS	By MS/MS	16.3
Q99832	Q99832	8	8	8	T-complex protein 1 subunit eta	CCT7	>Q99832 T-complex protein 1 subunit eta OS=Homo sapiens OX=9606 GN=CCT7 PE=1 SV=2	1	8	8	8	8	8	4	6	6	4	8	8	4	6	6	4	8	8	4	6	6	4	21.9	21.9	21.9	59.366	543	543	3.14	3	14	1	26	0	31.498	By MS/MS	By MS/MS	By MS/MS	By MS/MS	By MS/MS	By MS/MS	21.9
Q99873;Q9NR22	Q99873	8;2	8;2	8;2	Protein arginine N-methyltransferase 1	PRMT1	>Q99873 Protein arginine N-methyltransferase 1 OS=Homo sapiens OX=9606 GN=PRMT1 PE=1 SV=3	2	8	8	8	7	7	4	6	7	3	7	7	4	6	7	3	7	7	4	6	7	3	22.1	22.1	22.1	42.461	371	371;394	2.44	9	9	11	7	0	14.769	By MS/MS	By MS/MS	By MS/MS	By MS/MS	By MS/MS	By MS/MS	20.2
Q99961	Q99961	2	2	2	Endophilin-A2	SH3GL1	>Q99961 Endophilin-A2 OS=Homo sapiens OX=9606 GN=SH3GL1 PE=1 SV=1	1	2	2	2	2	2	1	2	2	1	2	2	1	2	2	1	2	2	1	2	2	1	8.7	8.7	8.7	41.489	368	368	2		10			0	3.3826	By MS/MS	By MS/MS	By matching	By MS/MS	By MS/MS	By matching	8.7
Q9BPU6	Q9BPU6	2	2	2	Dihydropyrimidinase-related protein 5	DPYSL5	>Q9BPU6 Dihydropyrimidinase-related protein 5 OS=Homo sapiens OX=9606 GN=DPYSL5 PE=1 SV=1	1	2	2	2	1	2	0	1	0	0	1	2	0	1	0	0	1	2	0	1	0	0	3.9	3.9	3.9	61.421	564	564	3.75			1	3	0.00063492	2.7399	By matching	By MS/MS	By matching	By matching	By matching	By matching	2
Q9BR76	Q9BR76	3	3	3	Coronin-1B	CORO1B	>Q9BR76 Coronin-1B OS=Homo sapiens OX=9606 GN=CORO1B PE=1 SV=1	1	3	3	3	3	1	1	1	2	0	3	1	1	1	2	0	3	1	1	1	2	0	10.4	10.4	10.4	54.234	489	489	3.25			6	2	0	12.494	By MS/MS	By matching	By matching	By MS/MS	By MS/MS	By matching	10.4
Q9BRA2	Q9BRA2	3	3	3	Thioredoxin domain-containing protein 17	TXNDC17	>Q9BRA2 Thioredoxin domain-containing protein 17 OS=Homo sapiens OX=9606 GN=TXNDC17 PE=1 SV=1	1	3	3	3	3	3	1	3	3	3	3	3	1	3	3	3	3	3	1	3	3	3	30.1	30.1	30.1	13.941	123	123	2.9		9	5	7	0	12.226	By MS/MS	By MS/MS	By MS/MS	By MS/MS	By MS/MS	By MS/MS	30.1
Q9BRF8	Q9BRF8	3	3	3	Serine/threonine-protein phosphatase CPPED1	CPPED1	>Q9BRF8 Serine/threonine-protein phosphatase CPPED1 OS=Homo sapiens OX=9606 GN=CPPED1 PE=1 SV=3	1	3	3	3	3	2	1	2	0	0	3	2	1	2	0	0	3	2	1	2	0	0	10.5	10.5	10.5	35.548	314	314	2.75		2	6		0	9.0888	By MS/MS	By MS/MS	By MS/MS	By matching	By matching	By matching	10.5
Q9BRK3	Q9BRK3	2	2	2	Matrix-remodeling-associated protein 8	MXRA8	>Q9BRK3 Matrix remodeling-associated protein 8 OS=Homo sapiens OX=9606 GN=MXRA8 PE=1 SV=1	1	2	2	2	1	1	0	1	1	1	1	1	0	1	1	1	1	1	0	1	1	1	3.8	3.8	3.8	49.131	442	442	3.6			2	3	0.0048283	1.6497	By MS/MS	By matching	By matching	By matching	By MS/MS	By matching	2.3
Q9BRK5	Q9BRK5	10	10	10	45 kDa calcium-binding protein	SDF4	>Q9BRK5 45 kDa calcium-binding protein OS=Homo sapiens OX=9606 GN=SDF4 PE=1 SV=1	1	10	10	10	10	9	9	9	9	9	10	9	9	9	9	9	10	9	9	9	9	9	32.9	32.9	32.9	41.806	362	362	1.53	54	18	12	1	0	32.969	By MS/MS	By MS/MS	By MS/MS	By MS/MS	By MS/MS	By MS/MS	32.9
Q9BS26	Q9BS26	9	9	9	Endoplasmic reticulum resident protein 44	ERP44	>Q9BS26 Endoplasmic reticulum resident protein 44 OS=Homo sapiens OX=9606 GN=ERP44 PE=1 SV=1	1	9	9	9	6	7	6	7	9	6	6	7	6	7	9	6	6	7	6	7	9	6	22.7	22.7	22.7	46.971	406	406	2.35	18	2	23	6	0	102.75	By MS/MS	By MS/MS	By MS/MS	By MS/MS	By MS/MS	By MS/MS	17.2
Q9BT78	Q9BT78	13	13	13	COP9 signalosome complex subunit 4	COPS4	>Q9BT78 COP9 signalosome complex subunit 4 OS=Homo sapiens OX=9606 GN=COPS4 PE=1 SV=1	1	13	13	13	7	11	6	9	10	10	7	11	6	9	10	10	7	11	6	9	10	10	41.9	41.9	41.9	46.268	406	406	3.09	1	4	41	11	0	42.034	By MS/MS	By MS/MS	By MS/MS	By MS/MS	By MS/MS	By MS/MS	22.2
Q9BTT0	Q9BTT0	4	4	4	Acidic leucine-rich nuclear phosphoprotein 32 family member E	ANP32E	>Q9BTT0 Acidic leucine-rich nuclear phosphoprotein 32 family member E OS=Homo sapiens OX=9606 GN=ANP32E PE=1 SV=1	1	4	4	4	4	4	3	4	3	2	4	4	3	4	3	2	4	4	3	4	3	2	22	22	22	30.692	268	268	3.55			9	11	0	86.588	By MS/MS	By MS/MS	By MS/MS	By MS/MS	By MS/MS	By MS/MS	22
Q9BTY2	Q9BTY2	6	6	6	Plasma alpha-L-fucosidase	FUCA2	>Q9BTY2 Plasma alpha-L-fucosidase OS=Homo sapiens OX=9606 GN=FUCA2 PE=1 SV=2	1	6	6	6	3	3	4	6	6	5	3	3	4	6	6	5	3	3	4	6	6	5	13.5	13.5	13.5	54.066	467	467	2.29	5	10	13		0	10.928	By MS/MS	By MS/MS	By MS/MS	By MS/MS	By MS/MS	By MS/MS	7.9
Q9BUD6	Q9BUD6	10	10	10	Spondin-2	SPON2	>Q9BUD6 Spondin-2 OS=Homo sapiens OX=9606 GN=SPON2 PE=1 SV=3	1	10	10	10	3	3	2	10	10	9	3	3	2	10	10	9	3	3	2	10	10	9	36	36	36	35.846	331	331	3.22	7	13	23	47	0	228.89	By matching	By MS/MS	By matching	By MS/MS	By MS/MS	By MS/MS	9.1
Q9BUF5	Q9BUF5	7	2	2	Tubulin beta-6 chain	TUBB6	>Q9BUF5 Tubulin beta-6 chain OS=Homo sapiens OX=9606 GN=TUBB6 PE=1 SV=1	1	7	2	2	7	5	3	5	4	2	2	1	0	0	0	0	2	1	0	0	0	0	19.7	6.1	6.1	49.857	446	446	2		3			0	3.4888	By MS/MS	By matching	By matching	By matching	By matching	By matching	19.7
Q9BUT1	Q9BUT1	5	5	5	3-hydroxybutyrate dehydrogenase type 2	BDH2	>Q9BUT1 3-hydroxybutyrate dehydrogenase type 2 OS=Homo sapiens OX=9606 GN=BDH2 PE=1 SV=2	1	5	5	5	3	4	3	5	1	3	3	4	3	5	1	3	3	4	3	5	1	3	23.7	23.7	23.7	26.724	245	245	2.33	4	6	11		0	19.376	By MS/MS	By MS/MS	By MS/MS	By MS/MS	By MS/MS	By MS/MS	12.2
Q9BVH7	Q9BVH7	2	2	2	Alpha-N-acetylgalactosaminide alpha-2,6-sialyltransferase 5	ST6GALNAC5	>Q9BVH7 Alpha-N-acetylgalactosaminide alpha-2,6-sialyltransferase 5 OS=Homo sapiens OX=9606 GN=ST6GALNAC5 PE=2 SV=1	1	2	2	2	0	0	0	2	2	0	0	0	0	2	2	0	0	0	0	2	2	0	5.4	5.4	5.4	38.442	336	336	2	2		2		0.0038314	1.7666	By matching	By matching	By matching	By MS/MS	By matching	By matching	0
Q9BW30	Q9BW30	7	7	7	Tubulin polymerization-promoting protein family member 3	TPPP3	>Q9BW30 Tubulin polymerization-promoting protein family member 3 OS=Homo sapiens OX=9606 GN=TPPP3 PE=1 SV=1	1	7	7	7	4	4	6	4	4	3	4	4	6	4	4	3	4	4	6	4	4	3	41.5	41.5	41.5	18.985	176	176	3.2		7	14	14	0	33.218	By MS/MS	By MS/MS	By MS/MS	By MS/MS	By MS/MS	By MS/MS	18.2
Q9BW91	Q9BW91	2	2	2	ADP-ribose pyrophosphatase, mitochondrial	NUDT9	>Q9BW91 ADP-ribose pyrophosphatase, mitochondrial OS=Homo sapiens OX=9606 GN=NUDT9 PE=1 SV=1	1	2	2	2	1	2	1	2	2	1	1	2	1	2	2	1	1	2	1	2	2	1	8.3	8.3	8.3	39.125	350	350	2		9			0	8.3106	By matching	By MS/MS	By matching	By matching	By MS/MS	By MS/MS	3.4
Q9BWD1	Q9BWD1	3	3	3	Acetyl-CoA acetyltransferase, cytosolic	ACAT2	>Q9BWD1 Acetyl-CoA acetyltransferase, cytosolic OS=Homo sapiens OX=9606 GN=ACAT2 PE=1 SV=2	1	3	3	3	3	3	2	3	3	3	3	3	2	3	3	3	3	3	2	3	3	3	6.8	6.8	6.8	41.35	397	397	2	6	9	6		0	7.6113	By MS/MS	By MS/MS	By matching	By MS/MS	By MS/MS	By MS/MS	6.8
Q9BWS9	Q9BWS9	4	4	4	Chitinase domain-containing protein 1	CHID1	>Q9BWS9 Chitinase domain-containing protein 1 OS=Homo sapiens OX=9606 GN=CHID1 PE=1 SV=1	1	4	4	4	2	2	1	3	4	2	2	2	1	3	4	2	2	2	1	3	4	2	10.9	10.9	10.9	44.94	393	393	2.81	6		1	9	0	6.8577	By MS/MS	By MS/MS	By matching	By MS/MS	By MS/MS	By MS/MS	5.9
Q9BX68	Q9BX68	3	3	3	Histidine triad nucleotide-binding protein 2, mitochondrial	HINT2	>Q9BX68 Histidine triad nucleotide-binding protein 2, mitochondrial OS=Homo sapiens OX=9606 GN=HINT2 PE=1 SV=1	1	3	3	3	1	2	0	3	2	1	1	2	0	3	2	1	1	2	0	3	2	1	27	27	27	17.162	163	163	2.78	2		5	2	0	26.448	By MS/MS	By MS/MS	By matching	By MS/MS	By MS/MS	By matching	12.3
[truncated: 170 more rows]
[truncated: 46 more columns]
