# Supplementary material for: Proteomic profiling of the human amniotic stem cell-highly abundant secreted proteins
Source: PeerJ. 2025 Jun 3;13:e19449. doi: 10.7717/peerj.19449 (PMC12143284; doi:10.7717/peerj.19449)
Supplement: Supplemental Information 3 [file peerj-13-19449-s003.xlsx]

## Sheet: PCR Cq
	Non-template negative control
	Sample Name	Gene Name	Cq	Cq Error	Dye	Slope	EPF
	CTRL	GAPDH	14.44	0.03	SYBR Green I	0.72	3.6
	CTRL	GAPDH	14.46	0.03	SYBR Green I	0.7	3.61
	CTRL	GAPDH	14.42	0.03	SYBR Green I	0.7	3.58
	CTRL	GAPDH	14.39	0.03	SYBR Green I	0.69	3.59
	10ng	GAPDH	22.17	0.04	SYBR Green I	0.67	3.3
	10ng	GAPDH	22.09	0.04	SYBR Green I	0.68	3.32
	10ng	GAPDH	22.09	0.04	SYBR Green I	0.65	3.26
	10ng	GAPDH	22.12	0.04	SYBR Green I	0.69	3.37
	CTRL	IL-1β	20	0.05	SYBR Green I	1.19	4.23
	CTRL	IL-1β	20.04	0.05	SYBR Green I	1.14	4.11
	CTRL	IL-1β	20.1	0.05	SYBR Green I	1.05	4.06
	CTRL	IL-1β	20.01	0.05	SYBR Green I	1.11	4.08
	10ng	IL-1β	25.06	0.01	SYBR Green I	1	3.71
	10ng	IL-1β	25.09	0.01	SYBR Green I	0.98	3.64
	10ng	IL-1β	25.06	0.01	SYBR Green I	0.98	3.65
	10ng	IL-1β	25.07	0.01	SYBR Green I	0.99	3.7
	CTRL	IL-6	30.63	0.18	SYBR Green I	1.11	4.24
	CTRL	IL-6	30.97	0.18	SYBR Green I	1.14	3.52
	CTRL	IL-6	30.99	0.18	SYBR Green I	1.04	3.97
	CTRL	IL-6	30.73	0.18	SYBR Green I	1.12	3.85
	10ng	IL-6	32.45	0.23	SYBR Green I	0.95	3.24
	10ng	IL-6	32.63	0.23	SYBR Green I	0.89	3.11
	10ng	IL-6	32.84	0.23	SYBR Green I	0.95	2.93
	10ng	IL-6	32.3	0.23	SYBR Green I	1.08	3.35
	CTRL	TGF-β	19.11	0.04	SYBR Green I	1.07	4.22
	CTRL	TGF-β	19.12	0.04	SYBR Green I	1.13	4.33
	CTRL	TGF-β	19.11	0.04	SYBR Green I	1.11	4.28
	CTRL	TGF-β	19.04	0.04	SYBR Green I	1.15	4.32
	10ng	TGF-β	24.02	0.02	SYBR Green I	1.01	3.9
	10ng	TGF-β	24.02	0.02	SYBR Green I	1.02	3.96
	10ng	TGF-β	23.98	0.02	SYBR Green I	1.01	3.91
	10ng	TGF-β	23.99	0.02	SYBR Green I	1.06	3.98
	CTRL	TNFa	23.69	0.05	SYBR Green I	1.29	4.47
	CTRL	TNFa	23.77	0.05	SYBR Green I	1.34	4.57
	CTRL	TNFa	23.68	0.05	SYBR Green I	1.3	4.5
	CTRL	TNFa	23.76	0.05	SYBR Green I	1.26	4.41
	10ng	TNFa	29.6	0.2	SYBR Green I	0.82	3.8
	10ng	TNFa	29.14	0.2	SYBR Green I	1	3.75
	10ng	TNFa	29.52	0.2	SYBR Green I	0.83	3.8
	10ng	TNFa	29.38	0.2	SYBR Green I	0.97	3.84
	Non-template negative control
	Sample Name	Gene Name	Cq	Cq Error	Dye	Slope	EPF
	None	GAPDH	-	-	SYBR Green I	0.02	0.19
	None	GAPDH	-	-	SYBR Green I	0	0.01

## Sheet: Sheet4
Sample Name	Gene Name	Cq
Ctrl	IL1beita	19.82
10ng	IL1beita	24.14
50ng	IL1beita	23.6
100ng	IL1beita	20.45
Ctrl	IL1beita	19.91
10ng	IL1beita	24.14
50ng	IL1beita	23.6
100ng	IL1beita	20.48
Ctrl	IL1beita	19.88
10ng	IL1beita	24.2
50ng	IL1beita	23.57
100ng	IL1beita	20.67
Ctrl	IL1beita	19.91
10ng	IL1beita	24.4
50ng	IL1beita	23.52
100ng	IL1beita	20.51
Ctrl	GAPDH	29.21
10ng	GAPDH	33.13
50ng	GAPDH	31.65
100ng	GAPDH	30.58
Ctrl	GAPDH	29.32
10ng	GAPDH	33.79
50ng	GAPDH	32.72
100ng	GAPDH	30.6
Ctrl	GAPDH	29.65
10ng	GAPDH	32.96
50ng	GAPDH	33.49
100ng	GAPDH	30.95
Ctrl	GAPDH	29.45
10ng	GAPDH	33.38
50ng	GAPDH	32.29
100ng	GAPDH	28.69

## Sheet: Sheet2
Sample Name	Gene Name	Condition Name	Cq	Cq Mean	Cq Error	Ratio	Ratio Error	Normalized Ratio	Normalized Ratio Error	Scaled Ratio	Scaled Ratio Error	Dye	Edited Call	Failure	Slope	EPF	Notes	Sample Prep Notes	Number
Contral	CD68	0ng	18.62	18.64	0.02	2774	108	-	-	-	-	SYBR Green I		None	0.91	4.19			1
ANXA2 10ng	CD68	10ng	21.09	21.11	0.02	5518	2379	-	-	-	-	SYBR Green I		None	0.71	3.63			2
ANXA2 50ng	CD68	50ng	21.37	21.21	0.11	2962	561.7	-	-	-	-	SYBR Green I		None	0.86	4.07			3
ANXA2 100ng	CD68	100ng	19.19	18.81	0.27	4068	809.7	-	-	-	-	SYBR Green I		None	0.85	4			4
Contral	IL-10	0ng	27.33	27.26	0.08	6.623	0.258	-	-	-	-	SYBR Green I		None	0.33	2.3			5
ANXA2 10ng	IL-10	10ng	30.41	30.78	0.48	8.634	3.722	-	-	-	-	SYBR Green I		None	0.34	1.86			6
ANXA2 50ng	IL-10	50ng	30.54	30.83	0.33	5.143	0.9751	-	-	-	-	SYBR Green I		None	0.32	1.8			7
ANXA2 100ng	IL-10	100ng	27.91	27.64	0.26	9.646	1.92	-	-	-	-	SYBR Green I		None	0.34	2.26			8
Contral	IL-6	0ng	30.37	30.21	0.27	0.8052	0.03137	-	-	-	-	SYBR Green I		None	0.58	2.51			9
ANXA2 10ng	IL-6	10ng	30.45	30.82	0.41	8.398	3.62	-	-	-	-	SYBR Green I		None	0.38	2.25			10
ANXA2 50ng	IL-6	50ng	35.29	34.65	1.19	0.1911	0.03624	-	-	-	-	SYBR Green I		None	2.69	2.38			11
ANXA2 100ng	IL-6	100ng	30.03	29.9	0.2	2.219	0.4417	-	-	-	-	SYBR Green I		None	0.51	2.5			12
Contral	CD68	0ng	18.62	18.64	0.02	2774	108	-	-	-	-	SYBR Green I		None	0.85	4.03			13
ANXA2 10ng	CD68	10ng	21.12	21.11	0.02	5405	2330	-	-	-	-	SYBR Green I		None	0.72	3.67			14
ANXA2 50ng	CD68	50ng	21.13	21.21	0.11	3498	663.3	-	-	-	-	SYBR Green I		None	0.72	3.73			15
ANXA2 100ng	CD68	100ng	18.66	18.81	0.27	5873	1169	-	-	-	-	SYBR Green I		None	0.59	3.33			16
Contral	IL-10	0ng	27.32	27.26	0.08	6.669	0.2598	-	-	-	-	SYBR Green I		None	0.33	2.31			17
ANXA2 10ng	IL-10	10ng	30.33	30.78	0.48	9.126	3.935	-	-	-	-	SYBR Green I		None	0.3	1.73			18
ANXA2 50ng	IL-10	50ng	30.55	30.83	0.33	5.107	0.9683	-	-	-	-	SYBR Green I		None	0.3	1.76			19
ANXA2 100ng	IL-10	100ng	27.35	27.64	0.26	14.22	2.831	-	-	-	-	SYBR Green I		None	0.28	2.09			20
Contral	IL-6	0ng	30.44	30.21	0.27	0.7671	0.02988	-	-	-	-	SYBR Green I		None	0.6	2.54			21
ANXA2 10ng	IL-6	10ng	30.48	30.82	0.41	8.225	3.546	-	-	-	-	SYBR Green I		None	0.35	2.05			22
ANXA2 50ng	IL-6	50ng	34.02	34.65	1.19	0.4609	0.08739	-	-	-	-	SYBR Green I		None	2.48	3.53			23
ANXA2 100ng	IL-6	100ng	29.68	29.9	0.2	2.828	0.563	-	-	-	-	SYBR Green I		None	0.47	2.43			24
Contral	CD68	0ng	18.64	18.64	0.02	2735	106.6	-	-	-	-	SYBR Green I		None	0.85	4.01			25
ANXA2 10ng	CD68	10ng	21.12	21.11	0.02	5405	2330	-	-	-	-	SYBR Green I		None	0.74	3.73			26
ANXA2 50ng	CD68	50ng	21.13	21.21	0.11	3498	663.3	-	-	-	-	SYBR Green I		None	0.73	3.72			27
ANXA2 100ng	CD68	100ng	18.82	18.81	0.27	5257	1046	-	-	-	-	SYBR Green I		None	0.63	3.46			28
Contral	IL-10	0ng	27.18	27.26	0.08	7.349	0.2863	-	-	-	-	SYBR Green I		None	0.32	2.27			29
ANXA2 10ng	IL-10	10ng	31.07	30.78	0.48	5.464	2.356	-	-	-	-	SYBR Green I		None	0.31	1.71			30
ANXA2 50ng	IL-10	50ng	31.13	30.83	0.33	3.416	0.6478	-	-	-	-	SYBR Green I		None	0.3	1.65			31
ANXA2 100ng	IL-10	100ng	27.5	27.64	0.26	12.82	2.551	-	-	-	-	SYBR Green I		None	0.29	2.11			32
Contral	IL-6	0ng	30.2	30.21	0.27	0.9059	0.03529	-	-	-	-	SYBR Green I		None	0.59	2.57			33
ANXA2 10ng	IL-6	10ng	31.18	30.82	0.41	5.063	2.183	-	-	-	-	SYBR Green I		None	0.35	1.81			34
ANXA2 50ng	IL-6	50ng	33.33	34.65	1.19	0.7435	0.141	-	-	-	-	SYBR Green I		None	2.33	4.16			35
ANXA2 100ng	IL-6	100ng	30.1	29.9	0.2	2.114	0.4208	-	-	-	-	SYBR Green I		None	0.6	2.61			36
Contral	CD68	0ng	18.67	18.64	0.02	2679	104.4	-	-	-	-	SYBR Green I		None	0.87	4.06			37
ANXA2 10ng	CD68	10ng	21.09	21.11	0.02	5518	2379	-	-	-	-	SYBR Green I		None	0.72	3.67			38
ANXA2 50ng	CD68	50ng	21.19	21.21	0.11	3356	636.3	-	-	-	-	SYBR Green I		None	0.75	3.79			39
ANXA2 100ng	CD68	100ng	18.58	18.81	0.27	6208	1236	-	-	-	-	SYBR Green I		None	0.53	3.16			40
Contral	IL-10	0ng	27.21	27.26	0.08	7.198	0.2804	-	-	-	-	SYBR Green I		None	0.34	2.35			41
ANXA2 10ng	IL-10	10ng	31.29	30.78	0.48	4.691	2.023	-	-	-	-	SYBR Green I		None	0.34	1.75			42
ANXA2 50ng	IL-10	50ng	31.11	30.83	0.33	3.464	0.6568	-	-	-	-	SYBR Green I		None	0.31	1.69			43
ANXA2 100ng	IL-10	100ng	27.79	27.64	0.26	10.48	2.087	-	-	-	-	SYBR Green I		None	0.34	2.27			44
Contral	IL-6	0ng	29.83	30.21	0.27	1.171	0.04561	-	-	-	-	SYBR Green I		None	0.62	2.71			45
ANXA2 10ng	IL-6	10ng	31.16	30.82	0.41	5.134	2.213	-	-	-	-	SYBR Green I		None	0.37	2.11			46
ANXA2 50ng	IL-6	50ng	35.96	34.65	1.19	0.1201	0.02277	-	-	-	-	SYBR Green I		None	2.26	2.05			47
ANXA2 100ng	IL-6	100ng	29.78	29.9	0.2	2.639	0.5253	-	-	-	-	SYBR Green I		None	0.58	2.7			48
Contral	TGF-beita	0ng	21	20.98	0.06	532.8	20.76	-	-	-	-	SYBR Green I		None	0.69	3.42			49
ANXA2 10ng	TGF-beita	10ng	-	-	-	-	-	-	-	-	-	SYBR Green I			-	-			50
ANXA2 50ng	TGF-beita	50ng	23.56	23.62	0.04	649.2	123.1	-	-	-	-	SYBR Green I		None	0.6	3.14			51
ANXA2 100ng	TGF-beita	100ng	20.76	20.89	0.23	1370	272.7	-	-	-	-	SYBR Green I		None	0.42	2.67			52
Contral	TNF a	0ng	25.92	25.9	0.05	17.6	0.6856	-	-	-	-	SYBR Green I		None	1.1	3.99			53
ANXA2 10ng	TNF a	10ng	29.16	29.27	0.19	20.53	8.853	-	-	-	-	SYBR Green I		None	0.97	3.61			54
ANXA2 50ng	TNF a	50ng	28.89	28.98	0.15	16.14	3.06	-	-	-	-	SYBR Green I		None	0.96	3.61			55
ANXA2 100ng	TNF a	100ng	25.85	25.92	0.3	40.22	8.007	-	-	-	-	SYBR Green I		None	0.66	2.95			56
Contral	GAPDH	0ng	30	30.06	0.06	-	-	-	-	-	-	SYBR Green I		None	0.36	2.18			57
ANXA2 10ng	GAPDH	10ng	32.68	33.52	0.62	-	-	-	-	-	-	SYBR Green I		None	0.25	1.33			58
ANXA2 50ng	GAPDH	50ng	33.1	32.9	0.27	-	-	-	-	-	-	SYBR Green I		None	0.37	1.8			59
ANXA2 100ng	GAPDH	100ng	31.54	31.18	0.29	-	-	-	-	-	-	SYBR Green I		None	0.4	2.04			60
Contral	TGF-beita	0ng	20.89	20.98	0.06	575	22.4	-	-	-	-	SYBR Green I		None	0.64	3.29			61
ANXA2 10ng	TGF-beita	10ng	23.53	23.51	0.02	1017	438.4	-	-	-	-	SYBR Green I		None	0.63	3.2			62
ANXA2 50ng	TGF-beita	50ng	23.63	23.62	0.04	618.4	117.3	-	-	-	-	SYBR Green I		None	0.61	3.17			63
ANXA2 100ng	TGF-beita	100ng	20.68	20.89	0.23	1448	288.3	-	-	-	-	SYBR Green I		None	0.4	2.56			64
Contral	TNF a	0ng	25.83	25.9	0.05	18.73	0.7297	-	-	-	-	SYBR Green I		None	1.05	3.91			65
ANXA2 10ng	TNF a	10ng	29.05	29.27	0.19	22.16	9.555	-	-	-	-	SYBR Green I		None	1.05	3.79			66
ANXA2 50ng	TNF a	50ng	28.89	28.98	0.15	16.14	3.06	-	-	-	-	SYBR Green I		None	0.92	3.51			67
ANXA2 100ng	TNF a	100ng	25.87	25.92	0.3	39.67	7.896	-	-	-	-	SYBR Green I		None	0.67	3			68
Contral	GAPDH	0ng	30.07	30.06	0.06	-	-	-	-	-	-	SYBR Green I		None	0.36	2.22			69
ANXA2 10ng	GAPDH	10ng	33.57	33.52	0.62	-	-	-	-	-	-	SYBR Green I		None	0.38	1.8			70
ANXA2 50ng	GAPDH	50ng	32.52	32.9	0.27	-	-	-	-	-	-	SYBR Green I		None	0.36	1.83			71
ANXA2 100ng	GAPDH	100ng	31.23	31.18	0.29	-	-	-	-	-	-	SYBR Green I		None	0.37	2.04			72
Contral	TGF-beita	0ng	20.99	20.98	0.06	536.5	20.9	-	-	-	-	SYBR Green I		None	0.65	3.32			73
ANXA2 10ng	TGF-beita	10ng	23.52	23.51	0.02	1024	441.5	-	-	-	-	SYBR Green I		None	0.58	3.04			74
ANXA2 50ng	TGF-beita	50ng	23.61	23.62	0.04	627.1	118.9	-	-	-	-	SYBR Green I		None	0.6	3.12			75
ANXA2 100ng	TGF-beita	100ng	21.21	20.89	0.23	1003	199.6	-	-	-	-	SYBR Green I		None	0.62	3.29			76
Contral	TNF a	0ng	25.91	25.9	0.05	17.72	0.6904	-	-	-	-	SYBR Green I		None	1.11	4			77
ANXA2 10ng	TNF a	10ng	29.42	29.27	0.19	17.15	7.393	-	-	-	-	SYBR Green I		None	0.97	3.6			78
ANXA2 50ng	TNF a	50ng	29.2	28.98	0.15	13.02	2.468	-	-	-	-	SYBR Green I		None	0.9	3.44			79
ANXA2 100ng	TNF a	100ng	25.62	25.92	0.3	47.18	9.391	-	-	-	-	SYBR Green I		None	0.57	2.71			80
Contral	GAPDH	0ng	30.13	30.06	0.06	-	-	-	-	-	-	SYBR Green I		None	0.34	2.1			81
ANXA2 10ng	GAPDH	10ng	34.18	33.52	0.62	-	-	-	-	-	-	SYBR Green I		None	0.4	1.58			82
ANXA2 50ng	GAPDH	50ng	32.89	32.9	0.27	-	-	-	-	-	-	SYBR Green I		None	0.4	1.76			83
ANXA2 100ng	GAPDH	100ng	30.85	31.18	0.29	-	-	-	-	-	-	SYBR Green I		None	0.39	2.12			84
Contral	TGF-beita	0ng	21.04	20.98	0.06	518.2	20.19	-	-	-	-	SYBR Green I		None	0.69	3.39			85
ANXA2 10ng	TGF-beita	10ng	23.49	23.51	0.02	1046	450.8	-	-	-	-	SYBR Green I		None	0.62	3.18			86
ANXA2 50ng	TGF-beita	50ng	23.66	23.62	0.04	605.7	114.8	-	-	-	-	SYBR Green I		None	0.58	3.08			87
ANXA2 100ng	TGF-beita	100ng	20.91	20.89	0.23	1235	245.8	-	-	-	-	SYBR Green I		None	0.53	2.94			88
Contral	TNF a	0ng	25.95	25.9	0.05	17.24	0.6715	-	-	-	-	SYBR Green I		None	1.12	4.04			89
ANXA2 10ng	TNF a	10ng	29.43	29.27	0.19	17.03	7.342	-	-	-	-	SYBR Green I		None	0.91	3.46			90
ANXA2 50ng	TNF a	50ng	28.93	28.98	0.15	15.7	2.976	-	-	-	-	SYBR Green I		None	0.84	3.3			91
ANXA2 100ng	TNF a	100ng	26.34	25.92	0.3	28.64	5.701	-	-	-	-	SYBR Green I		None	1.02	3.8			92
Contral	GAPDH	0ng	30.03	30.06	0.06	-	-	-	-	-	-	SYBR Green I		None	0.33	2.1			93
ANXA2 10ng	GAPDH	10ng	33.65	33.52	0.62	-	-	-	-	-	-	SYBR Green I		None	0.39	1.76			94
ANXA2 50ng	GAPDH	50ng	33.1	32.9	0.27	-	-	-	-	-	-	SYBR Green I		None	0.36	1.73			95
ANXA2 100ng	GAPDH	100ng	31.1	31.18	0.29	-	-	-	-	-	-	SYBR Green I		None	0.4	2.09			96
