# Supplementary material for: Proteomic profiling of the human amniotic stem cell-highly abundant secreted proteins
Source: PeerJ. 2025 Jun 3;13:e19449. doi: 10.7717/peerj.19449 (PMC12143284; doi:10.7717/peerj.19449)
Supplement: Supplemental Information 4 [file peerj-13-19449-s004.xlsx]

## Sheet: Sheet1
	ITEM TO CHECK	IMPORTANCE	CHECKLIST
	EXPERIMENTAL DESIGN
	Definition of experimental and control groups	E	Line 123-125
	Number within each group	E	Line 147-150
	Assay carried out by core lab or investigator's lab?	D	investigator's lab
	Acknowledgement of authors' contributions	D	\
	SAMPLE
	Description	E	Line 123-127
	Volume/mass of sample processed	D	Line 126
	Microdissection or macrodissection	E	Cell Line
	Processing procedure	E	Line 123-126
	If frozen - how and how quickly?	E	No
	If fixed - with what, how quickly?	E	No
	Sample storage conditions and duration (especially for FFPE samples)	E	No
	NUCLEIC ACID EXTRACTION
	Procedure and/or instrumentation	E	Line 126-130
	Name of kit and details of any modifications	E	Line 131
	Source of additional reagents used	D	\
	Details of DNase or RNAse treatment	E	Supplementary data 2
	Contamination assessment (DNA or RNA)	E	Supplementary data 2
	Nucleic acid quantification	E	Supplementary data 2
	Instrument and method	E	Supplementary data 2
	Purity (A260/A280)	D	\
	Yield	D	\
	RNA integrity method/instrument	E	\
	RIN/RQI or Cq of 3' and 5' transcripts	E	\
	Electrophoresis traces	D	\
	Inhibition testing (Cq dilutions, spike or other)	E	\
	REVERSE TRANSCRIPTION
	Complete reaction conditions	E	Line 130-135
	Amount of RNA and reaction volume	E	Line 132
	Priming oligonucleotide (if using GSP) and concentration	E	Supplementary data 2
	Reverse transcriptase and concentration	E	\
	Temperature and time	E	Line 133-134
	Manufacturer of reagents and catalogue numbers	D	\
	Cqs with and without RT	D*	\
	Storage conditions of cDNA	D	Line 135
	qPCR TARGET INFORMATION
	If multiplex, efficiency and LOD of each assay.	E	\
	Sequence accession number	E	Supplementary data 2
	Location of amplicon	D	Supplementary data 2
	Amplicon length	E	Supplementary data 2
	In silico specificity screen (BLAST, etc)	E	Supplementary data 2
	Pseudogenes, retropseudogenes or other homologs?	D	\
	Sequence alignment	D	\
	Secondary structure analysis of amplicon	D	\
	Location of each primer by exon or intron (if applicable)	E	Supplementary data 2
	What splice variants are targeted?	E	No
	qPCR OLIGONUCLEOTIDES
	Primer sequences	E	Line 144-145
	RTPrimerDB Identification Number	D	\
	Probe sequences	D**	\
	Location and identity of any modifications	E	\
	Manufacturer of oligonucleotides	D	\
	Purification method	D	\
	qPCR PROTOCOL
	Complete reaction conditions	E	Line 135-140
	Reaction volume and amount of cDNA/DNA	E	Line 140
	Primer, (probe), Mg++ and dNTP concentrations	E	TAKARA TB Green® Premix Ex Taq™ II （Mix Buffer）
	Polymerase identity and concentration	E	TAKARA TB Green® Premix Ex Taq™ II （Mix Buffer）
	Buffer/kit identity and manufacturer	E	TAKARA TB Green® Premix Ex Taq™ II （Mix Buffer）
	Exact chemical constitution of the buffer	D	TAKARA TB Green® Premix Ex Taq™ II （Mix Buffer）
	Additives (SYBR Green I, DMSO, etc.)	E	SYBR Green I
	Manufacturer of plates/tubes and catalog number	D	\
	Complete thermocycling parameters	E	\
	Reaction setup (manual/robotic)	D	robotic
	Manufacturer of qPCR instrument	E	Line
	qPCR VALIDATION
	Evidence of optimisation (from gradients)	D	\
	Specificity (gel, sequence, melt, or digest)	E	Supplementary data 2
	For SYBR Green I, Cq of the NTC	E	Supplementary Table 3
	Standard curves with slope and y-intercept	E	\
	PCR efficiency calculated from slope	E	\
	Confidence interval for PCR efficiency or standard error	D	\
	r2 of standard curve	E	\
	Linear dynamic range	E	\
	Cq variation at lower limit	E	\
	Confidence intervals throughout range	D	\
	Evidence for limit of detection	E	\
	If multiplex, efficiency and LOD of each assay.	E	\
	DATA ANALYSIS
	qPCR analysis program (source, version)	E	Line104-143，Supplementary data 2
	Cq method determination	E	Supplementary data 2
	Outlier identification and disposition	E	Supplementary data 2
	Results of NTCs	E	Supplementary Table 3
	Justification of number and choice of reference genes	E	Supplementary data 2
	Description of normalisation method	E	\
	Number and concordance of biological replicates	D	\
	Number and stage (RT or qPCR) of technical replicates	E	Line147-150
	Repeatability (intra-assay variation)	E	Line 147-150
	Reproducibility (inter-assay variation, %CV)	D	\
	Power analysis	D	\
	Statistical methods for result significance	E	Supplementary data 2
	Software (source, version)	E	Supplementary data 2
	Cq or raw data submission using RDML	D	Supplementary Table 3
	Table 1. MIQE checklist for authors, reviewers and editors. All essential information (E) must be submitted with the manuscript. Desirable
	information (D) should be submitted if available. If using primers obtained from RTPrimerDB, information on qPCR target, oligonucleotides,
	protocols and validation is available from that source.
	*: Assessing the absence of DNA using a no RT assay is essential when first extracting RNA. Once the sample has been validated as
	RDNA-free, inclusion of a no-RT control is desirable, but no longer essential.
	**: Disclosure of the probe sequence is highly desirable and strongly encouraged. However, since not all commercial pre-designed assay
	vendors provide this information, it cannot be an essential requirement. Use of such assays is advised against.

## Sheet: Sheet2
						Sample name	Concentration	A260/230	A260/280
						Control	155.2ug/ul	0.856	2.019
						ANXA2-10ng	150.4ug/ul	1.715	2.021
